# Supplementary material for: Small molecule/ML327 mediated transcriptional de-repression of E-cadherin and inhibition of epithelial-to-mesenchymal transition
Source: PubMed Central journal article supplement (PMC4673210; doi:10.18632/oncotarget.4473), 2015-06-10
Supplement: oncotarget-06-22934-s002.pdf [file oncotarget-06-22934-s002.pdf]

## SW620\_CHX ML327 treatment differential expressed genes from RNAseq analysis

| gene     | logFC    | FDR       |
|----------|----------|-----------|
| ARC      | 2.650365 | 0         |
| SYT11    | 1.627168 | 0         |
| IER3     | -1.06493 | 3.60E-312 |
| PPP1R15A | -1.03745 | 7.97E-294 |
| MAP1B    | 2.166502 | 8.82E-287 |
| BHLHE41  | 3.912041 | 1.66E-280 |
| HSPA8    | -1.17217 | 1.51E-279 |
| VGF      | 3.380987 | 1.43E-265 |
| AXIN2    | -1.11341 | 3.25E-258 |
| BMP4     | -1.06206 | 1.06E-252 |
| MAP1A    | 2.566028 | 3.50E-240 |
| PCDH1    | 2.454781 | 4.70E-235 |
| MYC      | -1.05862 | 2.24E-213 |
| IGFBP3   | 3.902902 | 1.48E-211 |
| SYNM     | 2.824935 | 2.21E-209 |
| CCND2    | 5.115318 | 9.71E-200 |
| CDH1     | 1.668249 | 5.92E-190 |
| CXCR4    | 3.81936  | 3.61E-184 |
| EGR4     | 0.935614 | 1.24E-180 |
| SLC38A2  | -0.97812 | 6.53E-180 |
| AMIGO2   | -1.33086 | 8.80E-180 |
| SOX2     | -1.0326  | 3.20E-177 |
| KDM6B    | -1.16994 | 3.37E-177 |
| ZNF365   | 4.084967 | 5.56E-176 |
| HSPA2    | 2.289826 | 6.10E-171 |
| TM4SF1   | -0.93119 | 1.13E-170 |
| KLF6     | -1.37745 | 1.34E-170 |
| NRIP3    | 1.872241 | 5.16E-170 |
| DLX3     | 1.29608  | 4.90E-169 |
| CLU      | 1.227037 | 4.84E-165 |
| SOX4     | -0.78472 | 4.19E-164 |
| SSFA2    | -0.82225 | 6.77E-164 |
| AMOTL2   | -0.79346 | 2.09E-163 |
| APLN     | 1.978667 | 3.34E-163 |
| RREB1    | 1.198714 | 3.02E-162 |
| ARL4A    | -0.85065 | 2.73E-160 |
| CYR61    | -0.94366 | 6.29E-160 |
| FLNC     | 2.253943 | 1.03E-159 |
| FOXQ1    | -1.029   | 4.52E-158 |
| PCDH20   | 4.245841 | 9.97E-158 |
| PHF23    | -1.18753 | 6.10E-157 |
| PLK2     | -0.91402 | 8.41E-157 |
| TFAP2C   | 3.247169 | 4.15E-156 |
| WEE1     | -1.36501 | 2.43E-155 |
| AJUBA    | -0.75215 | 5.09E-155 |

|          |          |           |
|----------|----------|-----------|
| DUSP6    | -0.92697 | 3.51E-154 |
| ZFP36L1  | -0.87931 | 4.33E-154 |
| MCAM     | 0.946027 | 3.70E-149 |
| HIC1     | 3.295382 | 1.80E-146 |
| L3MBTL3  | 1.773138 | 2.42E-143 |
| SEMA6B   | 2.01536  | 8.30E-143 |
| SLC30A2  | 2.827545 | 3.61E-139 |
| SERPINB9 | 1.028621 | 2.14E-137 |
| SYNPO    | 2.182134 | 2.91E-137 |
| EOMES    | 1.723501 | 2.04E-136 |
| CCDC71L  | 1.45189  | 3.45E-136 |
| WNT7B    | 2.503306 | 1.15E-135 |
| GATA6    | 1.956961 | 3.34E-135 |
| CEBPA    | 1.915447 | 3.31E-134 |
| PPP1R15B | -0.8517  | 2.51E-133 |
| TMCC2    | 2.35053  | 3.27E-131 |
| FZD10    | 2.146094 | 8.04E-131 |
| DUSP8    | 1.361701 | 8.59E-131 |
| TIPARP   | -0.78776 | 1.42E-130 |
| METRNL   | 2.353747 | 1.63E-130 |
| ID2      | -0.76149 | 1.11E-129 |
| SYN1     | 2.548232 | 1.39E-129 |
| C11orf96 | 2.018605 | 2.37E-129 |
| LDLR     | -0.9629  | 3.45E-129 |
| LBH      | 2.005099 | 2.49E-128 |
| TOB2     | -0.94568 | 1.18E-123 |
| NOTCH2   | 1.721485 | 2.95E-123 |
| GLIS2    | 2.205988 | 1.04E-122 |
| IL10RA   | 3.551073 | 1.23E-118 |
| MBIP     | -1.05271 | 1.96E-117 |
| ZCCHC3   | -0.83862 | 2.19E-116 |
| SERTAD3  | -1.98579 | 2.26E-116 |
| RASSF10  | 3.127944 | 2.74E-116 |
| SNAI1    | 1.695972 | 3.75E-116 |
| BCORL1   | 0.982444 | 4.93E-116 |
| YOD1     | -1.16866 | 1.97E-115 |
| SGK223   | -0.7062  | 3.98E-113 |
| NUAK2    | -0.92227 | 1.17E-112 |
| ZFHX2    | 2.195143 | 1.22E-112 |
| CDK5R2   | 2.978172 | 7.16E-112 |
| PDE4DIP  | 1.257138 | 1.00E-111 |
| SRXN1    | 0.867651 | 1.59E-111 |
| RBM39    | -0.69989 | 2.71E-111 |
| LOX      | 3.889973 | 3.04E-110 |
| SNPH     | 2.306581 | 3.21E-110 |
| POU3F2   | 2.20535  | 2.56E-109 |
| EIF5     | -0.67886 | 4.87E-109 |

|          |          |           |
|----------|----------|-----------|
| GFI1     | 2.154735 | 5.55E-109 |
| NXF1     | -0.78972 | 9.27E-109 |
| ABCB1    | 1.745137 | 2.14E-108 |
| SLC2A3   | -0.69725 | 1.22E-107 |
| DDIT4    | 1.860964 | 3.14E-107 |
| RAB39B   | 1.674998 | 2.29E-106 |
| NFE2L2   | -0.64993 | 2.79E-106 |
| EPHA2    | -0.5284  | 6.76E-106 |
| RLF      | -0.85124 | 7.87E-103 |
| TIMP3    | 2.36966  | 9.72E-103 |
| NUAK1    | 1.29762  | 1.23E-101 |
| PIP5K1A  | -0.69992 | 1.33E-101 |
| NRARP    | 1.532505 | 2.21E-101 |
| GATA2    | 1.673138 | 5.31E-101 |
| CHST3    | 2.306882 | 2.19E-100 |
| NFATC2   | 1.006884 | 1.04E-99  |
| PADI2    | 3.679312 | 2.23E-99  |
| AIM1L    | 0.877139 | 5.60E-99  |
| KCNK5    | 1.395471 | 5.83E-97  |
| CCNL1    | -0.66005 | 5.98E-96  |
| ARID3B   | -0.75695 | 1.12E-95  |
| PODXL    | 1.198234 | 1.42E-95  |
| CSTF1    | -0.76645 | 4.51E-95  |
| NGFR     | 0.724804 | 6.23E-95  |
| FA2H     | 1.444372 | 8.91E-95  |
| FOSL1    | -0.95203 | 1.24E-94  |
| THEMIS2  | 2.149818 | 1.55E-94  |
| ARL4C    | 1.337423 | 2.30E-94  |
| TRIM8    | -0.75064 | 2.34E-94  |
| PCF11    | -0.7769  | 3.86E-93  |
| LMX1B    | 2.481971 | 5.25E-93  |
| FGF19    | 0.720324 | 6.73E-93  |
| NAT8L    | 2.638474 | 1.29E-92  |
| SIK1     | -0.76442 | 1.77E-92  |
| RASSF8   | 1.421965 | 1.97E-92  |
| IRF2BP2  | -0.78873 | 2.79E-91  |
| RGAG4    | 1.939765 | 3.75E-91  |
| RCOR2    | 1.129548 | 9.11E-91  |
| PDE4A    | 1.711782 | 9.30E-91  |
| ITGA3    | 0.850196 | 1.89E-90  |
| NOL4L    | 1.103302 | 5.81E-90  |
| CORO2A   | 1.851058 | 8.52E-89  |
| FASTKD5  | -0.83339 | 6.98E-88  |
| B3GNT3   | 1.226466 | 9.56E-88  |
| TBX21    | 3.24012  | 3.41E-87  |
| ADCY9    | 1.337674 | 5.27E-87  |
| KIAA0513 | 2.100627 | 6.18E-87  |

|          |          |          |
|----------|----------|----------|
| SHC4     | 2.065933 | 6.18E-87 |
| PDP1     | -0.72989 | 1.24E-86 |
| ZNF408   | -1.00408 | 1.71E-86 |
| SDC3     | 0.773402 | 1.59E-85 |
| RASSF5   | 1.54221  | 1.85E-85 |
| FOXC1    | 1.136661 | 2.04E-85 |
| FZD1     | 3.017333 | 2.34E-85 |
| CLDN4    | 0.829727 | 6.87E-85 |
| KCTD12   | 4.324034 | 6.24E-84 |
| TOP1     | -0.57146 | 2.43E-83 |
| ADAMTS15 | 1.344771 | 3.59E-83 |
| TLX1     | 3.345019 | 5.54E-82 |
| IL11     | 2.417742 | 7.17E-82 |
| ASPHD2   | 3.66298  | 7.35E-82 |
| ZFP90    | 1.346713 | 7.77E-82 |
| BRD2     | -0.54984 | 1.12E-81 |
| BIRC3    | 0.951965 | 2.35E-81 |
| SYBU     | 1.397202 | 6.50E-81 |
| PPRC1    | -0.68643 | 1.30E-80 |
| GATA3    | 1.426726 | 1.54E-80 |
| KANSL2   | -0.71406 | 1.71E-80 |
| SETD1B   | -1.17844 | 1.77E-80 |
| SERTAD1  | -0.62782 | 1.92E-80 |
| PHLDA1   | -0.47085 | 2.48E-80 |
| TNFSF9   | 2.339988 | 4.04E-80 |
| SLC40A1  | 2.576093 | 4.05E-80 |
| SLC16A14 | 1.363519 | 1.49E-79 |
| CDC25A   | -0.89009 | 6.14E-79 |
| SLC52A3  | 1.788216 | 9.41E-79 |
| SYT12    | 2.639516 | 1.32E-78 |
| PAX9     | 1.818765 | 2.68E-77 |
| SLC2A1   | -0.52506 | 2.68E-77 |
| TMEM2    | -0.76867 | 5.66E-77 |
| SIRPA    | 1.19547  | 7.56E-77 |
| PTPRU    | 1.796754 | 1.10E-76 |
| YTHDF2   | -0.70515 | 1.23E-76 |
| RGS3     | 1.034799 | 1.64E-76 |
| C6orf62  | -0.70039 | 1.65E-76 |
| CRKL     | -0.6072  | 2.01E-76 |
| ZBTB2    | -0.83432 | 5.34E-76 |
| ATMIN    | -0.60888 | 5.86E-76 |
| BCAR3    | 1.379745 | 6.56E-76 |
| NEDD9    | 1.275758 | 8.25E-76 |
| TMEM151A | 4.343774 | 9.99E-76 |
| ELOVL7   | 1.400271 | 1.34E-75 |
| CDKN1A   | 1.084729 | 2.18E-75 |
| DLL4     | 1.261897 | 3.56E-75 |

|          |          |          |
|----------|----------|----------|
| ZCCHC12  | 2.360678 | 1.12E-74 |
| TGM2     | 1.126341 | 1.40E-74 |
| CLK1     | -0.75323 | 3.27E-74 |
| MMP15    | 1.794649 | 3.34E-74 |
| FAM167A  | 1.400547 | 5.40E-74 |
| COL4A2   | 0.973694 | 5.51E-74 |
| TUBA1A   | 0.816121 | 5.81E-74 |
| VDR      | 1.241932 | 6.72E-74 |
| PHOSPHO1 | 3.229714 | 1.17E-73 |
| KPNA2    | -0.51682 | 3.14E-73 |
| NR4A3    | 1.287988 | 8.71E-73 |
| CLDN3    | 1.534643 | 9.45E-73 |
| FN1      | 1.026129 | 2.36E-72 |
| ITGA5    | 0.916131 | 2.36E-72 |
| WDR26    | -0.52603 | 2.46E-72 |
| FZD4     | 1.701472 | 3.62E-72 |
| CASZ1    | 0.888963 | 5.11E-72 |
| PDX1     | 2.528712 | 8.29E-72 |
| CCNT2    | -0.78726 | 1.15E-71 |
| SLC4A8   | 1.423735 | 1.45E-71 |
| LFNG     | 1.21788  | 2.71E-71 |
| NPTXR    | 1.228606 | 4.58E-71 |
| MRPL44   | -0.70372 | 6.54E-71 |
| EAF1     | -0.61808 | 8.77E-71 |
| HS6ST1   | 0.927176 | 9.07E-71 |
| COL12A1  | 3.320849 | 1.57E-70 |
| UNC5B    | 2.803963 | 4.49E-70 |
| SOX9     | -0.6036  | 4.83E-70 |
| CELSR2   | 1.06542  | 6.45E-70 |
| DIRAS2   | 2.156951 | 1.19E-69 |
| PNRC2    | -0.53024 | 1.75E-69 |
| RNF10    | -0.52069 | 1.87E-69 |
| DLG3     | 0.682536 | 9.51E-69 |
| SOWAHA   | 1.632264 | 1.69E-68 |
| CX3CL1   | 1.694253 | 2.61E-68 |
| SHOX2    | 2.868561 | 2.63E-68 |
| BRD1     | -0.65218 | 5.54E-68 |
| SIPA1L2  | 3.008343 | 6.29E-68 |
| LRP4     | 0.962302 | 8.05E-68 |
| EIF1AD   | -0.88139 | 9.32E-68 |
| ZCCHC24  | 0.945216 | 1.47E-67 |
| DLL1     | 3.68863  | 1.52E-67 |
| RIOK3    | -0.54606 | 1.89E-67 |
| FOXO1    | 1.327961 | 1.99E-67 |
| SBDSP1   | -0.56692 | 4.71E-67 |
| BDNF     | 4.533067 | 5.61E-67 |
| BCL2L1   | -0.5036  | 8.00E-67 |

|           |          |          |
|-----------|----------|----------|
| CEBPB     | 1.423068 | 8.07E-67 |
| HSPA5     | -0.46152 | 1.08E-66 |
| SLC16A9   | 1.216942 | 1.61E-66 |
| CCDC184   | 6.168064 | 4.41E-66 |
| POU4F1    | 1.855421 | 5.27E-66 |
| PLAU      | 0.782388 | 6.81E-66 |
| IER5L     | 0.923147 | 1.52E-65 |
| SOX8      | 1.901316 | 1.94E-65 |
| RSPRY1    | -0.65811 | 2.46E-65 |
| DAB2IP    | 0.858434 | 5.33E-65 |
| FSTL3     | 1.26202  | 7.09E-65 |
| MAFG      | -0.63389 | 7.20E-65 |
| OTUB2     | 2.244147 | 7.78E-65 |
| STX11     | 4.258478 | 1.23E-64 |
| C11orf45  | 1.538672 | 2.24E-64 |
| CAMK2N1   | 2.123033 | 2.29E-64 |
| PTCH2     | 1.968816 | 3.31E-64 |
| C15orf62  | -0.91858 | 4.20E-64 |
| SRF       | -0.54052 | 5.36E-64 |
| SLC16A6   | -0.77984 | 1.06E-63 |
| LARP4B    | -0.53975 | 1.21E-63 |
| SIRT1     | -0.56401 | 2.07E-63 |
| DDX28     | -0.86761 | 3.41E-63 |
| H1FO      | 0.506128 | 3.70E-63 |
| TXNIP     | -0.55941 | 4.51E-63 |
| PHF21A    | 0.694028 | 4.60E-63 |
| CHSY1     | 1.168536 | 4.98E-63 |
| TPPP      | 1.394055 | 5.46E-63 |
| RSRC2     | -0.58075 | 7.27E-63 |
| IPMK      | -0.77988 | 8.00E-63 |
| BCL11B    | 3.884053 | 1.07E-62 |
| HOXD8     | 2.060532 | 1.30E-62 |
| CRK       | -0.54621 | 1.54E-62 |
| RBM5      | -0.48887 | 7.59E-62 |
| FGFR3     | 1.916868 | 8.65E-62 |
| DCBLD2    | -0.45576 | 2.06E-61 |
| DDX20     | -0.72432 | 2.40E-61 |
| SNIP1     | -0.90185 | 2.55E-61 |
| ZNF367    | -1.41564 | 4.21E-61 |
| PCNXL4    | -0.60057 | 4.52E-61 |
| DCAF12    | -0.66656 | 5.40E-61 |
| LOC652276 | -0.98927 | 5.79E-61 |
| FUT1      | 2.031204 | 7.71E-61 |
| TNFRSF1B  | 0.668207 | 8.39E-61 |
| ADM       | 1.058646 | 8.59E-61 |
| DMRT2     | 1.640708 | 9.28E-61 |
| CBX4      | 0.50145  | 1.20E-60 |

|            |          |          |
|------------|----------|----------|
| EGLN3      | 2.22401  | 2.14E-60 |
| ALOXE3     | 1.272394 | 3.12E-60 |
| SLC20A2    | -0.68207 | 4.17E-60 |
| KLF15      | 2.128434 | 6.84E-60 |
| MEX3B      | 2.241338 | 1.60E-59 |
| GRAMD1B    | 0.826928 | 1.94E-59 |
| SCAMP5     | 1.573376 | 2.44E-59 |
| UBC        | -0.59348 | 2.57E-59 |
| KAZN       | 1.810439 | 3.43E-59 |
| JAG2       | 0.772265 | 3.74E-59 |
| TPBG       | 1.875606 | 4.25E-59 |
| RAB11FIP5  | 1.433299 | 4.49E-59 |
| NRROS      | 1.617089 | 4.55E-59 |
| DNAJA1     | -0.57271 | 4.85E-59 |
| SMNDC1     | -0.78697 | 9.20E-59 |
| NFIC       | 0.714493 | 1.67E-58 |
| PFKFB3     | 0.56334  | 2.05E-58 |
| SGK1       | 1.83298  | 2.17E-58 |
| AKIRIN1    | -0.46952 | 2.26E-58 |
| ZNF618     | 1.037476 | 2.57E-58 |
| RSBN1      | -0.79372 | 6.87E-58 |
| GDF11      | 0.755022 | 8.18E-58 |
| CMTM3      | 0.694266 | 1.20E-57 |
| IRF6       | 1.358305 | 1.55E-57 |
| CKS2       | -0.66326 | 1.61E-57 |
| AURKA      | -0.57739 | 3.07E-57 |
| C1orf115   | 0.921723 | 3.50E-57 |
| SBDS       | -0.53645 | 3.90E-57 |
| ZNF217     | 0.577449 | 7.72E-57 |
| DIXDC1     | 0.942707 | 1.33E-56 |
| CDS1       | 3.050601 | 1.39E-56 |
| EFR3B      | 0.969453 | 1.51E-56 |
| TEX19      | 3.16962  | 3.10E-56 |
| JMJD1C     | -0.58842 | 3.39E-56 |
| RBM48      | -0.92473 | 3.54E-56 |
| CNN2       | -0.43242 | 5.11E-56 |
| SMEK1      | -0.54873 | 5.80E-56 |
| EIF4A2     | -0.41542 | 1.85E-55 |
| LRRC8C     | 1.316397 | 1.93E-55 |
| PGF        | 2.051714 | 2.14E-55 |
| SPRED2     | -0.62148 | 2.21E-55 |
| TSC22D1    | -0.52494 | 3.29E-55 |
| MED26      | -0.81294 | 4.39E-55 |
| ZIC2       | 3.509152 | 4.66E-55 |
| LOC1005072 | -0.53647 | 5.48E-55 |
| C2CD4A     | 4.614113 | 8.63E-55 |
| C16orf70   | -0.61378 | 1.37E-54 |

|          |          |          |
|----------|----------|----------|
| FLNB     | 0.530794 | 1.90E-54 |
| SIX1     | 1.177461 | 2.18E-54 |
| PMP22    | 1.680541 | 2.19E-54 |
| MAFF     | -0.50174 | 2.57E-54 |
| ESAM     | 2.511014 | 2.84E-54 |
| FGF18    | 1.114979 | 2.86E-54 |
| NACC1    | -0.66193 | 4.38E-54 |
| TERF2IP  | -0.54605 | 5.14E-54 |
| EZR      | -0.38648 | 5.17E-54 |
| KBTBD2   | -0.65024 | 6.64E-54 |
| CDKN1B   | -0.69048 | 8.64E-54 |
| FAM46C   | 1.906633 | 1.15E-53 |
| CHRM4    | 3.252852 | 1.20E-53 |
| HEY2     | 2.039343 | 1.25E-53 |
| NR3C1    | 1.755255 | 1.37E-53 |
| SLC44A2  | 0.755367 | 1.46E-53 |
| ZNF394   | -1.04755 | 1.78E-53 |
| OSBP     | -0.44499 | 2.25E-53 |
| SOCS2    | 0.983301 | 2.39E-53 |
| RNF19A   | -0.72554 | 2.94E-53 |
| RTN4RL2  | 2.602568 | 3.38E-53 |
| THBS1    | -0.60418 | 3.43E-53 |
| EHD2     | 3.223981 | 3.66E-53 |
| KIAA1462 | 1.515011 | 3.74E-53 |
| MAFA     | 2.61587  | 4.96E-53 |
| GADD45G  | 2.846598 | 5.18E-53 |
| C3orf38  | -0.69922 | 8.69E-53 |
| MARVELD3 | 1.928335 | 1.16E-52 |
| RNF4     | -0.59637 | 1.35E-52 |
| VCPKMT   | -1.16434 | 1.36E-52 |
| FOXA1    | 6.506035 | 1.64E-52 |
| AAR2     | -0.56346 | 2.67E-52 |
| CELSR3   | 0.806953 | 2.86E-52 |
| KLF10    | -0.49355 | 4.30E-52 |
| CYP2U1   | 1.543171 | 5.90E-52 |
| DR1      | -0.50752 | 6.07E-52 |
| SLAIN1   | 0.963228 | 7.89E-52 |
| LPHN1    | 0.924979 | 9.43E-52 |
| SBK1     | 1.182207 | 1.01E-51 |
| ZIC5     | 5.172576 | 1.02E-51 |
| CRY1     | -0.72685 | 1.13E-51 |
| AXIN1    | -0.61551 | 1.59E-51 |
| AKAP5    | 1.698522 | 1.99E-51 |
| FAM46A   | 0.930371 | 1.99E-51 |
| TMEM51   | 2.197451 | 2.16E-51 |
| CYP24A1  | 2.307179 | 3.29E-51 |
| SMG8     | -0.69364 | 3.31E-51 |



|          |          |          |
|----------|----------|----------|
| ARHGAP23 | -0.50194 | 3.90E-51 |
| MSL1     | -0.72927 | 4.44E-51 |
| PAQR8    | 0.793112 | 4.79E-51 |
| SETD5    | -0.6027  | 6.75E-51 |
| ARHGDIB  | 0.954807 | 7.62E-51 |
| PRICKLE1 | 5.974593 | 9.95E-51 |
| NUFIP2   | -0.62468 | 1.37E-50 |
| GPBP1L1  | -0.63857 | 1.49E-50 |
| RASGRP1  | 3.11845  | 1.74E-50 |
| RGS16    | 1.725331 | 1.80E-50 |
| YTHDF1   | -0.60846 | 1.82E-50 |
| RUNX3    | 0.654273 | 2.06E-50 |
| SP6      | 1.450548 | 2.31E-50 |
| AMOT     | 1.044634 | 2.52E-50 |
| BLCAP    | -0.62597 | 4.36E-50 |
| WHAMM    | -0.66255 | 8.18E-50 |
| CKAP4    | 1.130647 | 1.07E-49 |
| EHF      | 0.593371 | 1.08E-49 |
| BMP2     | 5.956867 | 1.30E-49 |
| MFSD2A   | 1.152369 | 1.40E-49 |
| ZFX      | -0.52759 | 1.64E-49 |
| ANKRD13C | -0.59666 | 1.86E-49 |
| SYVN1    | -0.64031 | 2.12E-49 |
| TARDBP   | -0.46473 | 2.21E-49 |
| ITPKB    | 1.821017 | 2.28E-49 |
| TBCC     | -1.12117 | 2.28E-49 |
| COL1A1   | 1.44323  | 2.81E-49 |
| EPAS1    | 3.533819 | 3.04E-49 |
| AKAP8    | -0.61043 | 3.05E-49 |
| ARHGEF26 | 1.101604 | 3.18E-49 |
| RRP8     | -0.56365 | 3.44E-49 |
| ISL1     | 3.293561 | 4.94E-49 |
| SPATA2   | -0.80733 | 5.06E-49 |
| TUBB2B   | 2.332755 | 6.17E-49 |
| CSF1     | 3.042502 | 6.87E-49 |
| BTG3     | 1.024002 | 8.40E-49 |
| HPCAL4   | 3.532658 | 9.11E-49 |
| FAM84B   | 2.246308 | 9.41E-49 |
| RBM47    | 0.704643 | 1.34E-48 |
| N4BP3    | 2.743374 | 1.43E-48 |
| HCP5     | 1.601938 | 2.36E-48 |
| SDE2     | -0.71851 | 2.66E-48 |
| RAET1K   | 1.306768 | 2.66E-48 |
| NPPC     | 3.590912 | 2.81E-48 |
| NAGS     | 3.250369 | 2.85E-48 |
| PCBP1    | -0.4407  | 3.53E-48 |
| LAMB3    | 0.776166 | 3.75E-48 |

|          |          |          |
|----------|----------|----------|
| VEGFA    | 1.024837 | 4.09E-48 |
| PABPC4   | -0.44739 | 1.65E-47 |
| KMT2E    | -0.67876 | 1.77E-47 |
| MT1H     | 1.193114 | 2.47E-47 |
| SVEP1    | 1.068523 | 2.82E-47 |
| GPR180   | 0.858024 | 3.67E-47 |
| EFNA3    | 3.674003 | 3.80E-47 |
| CDR2L    | 0.641817 | 4.43E-47 |
| SCN8A    | 0.887884 | 4.62E-47 |
| VCPIP1   | -0.80762 | 5.10E-47 |
| RAG1     | 1.16313  | 5.48E-47 |
| PRR15    | 1.91025  | 8.73E-47 |
| STOX1    | 0.905703 | 1.03E-46 |
| ELL      | -0.80181 | 1.05E-46 |
| CCDC160  | 3.91559  | 1.13E-46 |
| UGDH-AS1 | 0.600014 | 1.31E-46 |
| FILIP1L  | 0.600036 | 1.32E-46 |
| EXOC8    | -0.68697 | 1.43E-46 |
| KLHDC7A  | 0.828057 | 1.75E-46 |
| DLX6     | 1.992559 | 1.79E-46 |
| RLIM     | -0.54131 | 1.81E-46 |
| DAPK3    | -0.59043 | 1.82E-46 |
| TCEB3    | -0.61306 | 2.20E-46 |
| POLR1C   | -0.9237  | 2.50E-46 |
| FAM131B  | 4.349047 | 2.58E-46 |
| FLRT3    | 3.818009 | 2.73E-46 |
| COQ10B   | -0.63173 | 2.78E-46 |
| OTX1     | 2.095089 | 3.04E-46 |
| ESYT3    | 1.329614 | 3.04E-46 |
| ZXDB     | -0.71865 | 3.08E-46 |
| FAM78A   | 4.418081 | 3.23E-46 |
| DDX3X    | -0.53588 | 3.46E-46 |
| HIST1H1D | 3.646283 | 3.51E-46 |
| SH3PXD2B | 1.026093 | 4.29E-46 |
| KLF13    | 0.945802 | 4.65E-46 |
| TMEM169  | 1.147016 | 6.13E-46 |
| EPOR     | 1.258138 | 8.02E-46 |
| KCNC1    | 3.88554  | 8.13E-46 |
| ANGPTL4  | 3.270411 | 8.75E-46 |
| ZYX      | -0.45198 | 8.92E-46 |
| EVX1     | 4.956275 | 1.12E-45 |
| NOTCH1   | 0.564728 | 1.31E-45 |
| KRT18    | -0.48932 | 1.40E-45 |
| USP27X   | 2.212875 | 1.64E-45 |
| TBC1D2B  | 0.637066 | 1.78E-45 |
| VIPR1    | 1.97485  | 1.88E-45 |
| TLR4     | 1.410435 | 2.13E-45 |

|          |          |          |
|----------|----------|----------|
| GDPD1    | 1.467513 | 2.52E-45 |
| FAM105A  | 2.386459 | 2.91E-45 |
| FZD8     | 5.780443 | 2.96E-45 |
| RAB5A    | -0.48565 | 3.16E-45 |
| CNOT4    | -0.51947 | 3.85E-45 |
| HEYL     | 1.501319 | 4.09E-45 |
| ZNF3     | -0.6038  | 4.53E-45 |
| FHOD1    | 0.587509 | 4.88E-45 |
| MAX      | -0.49831 | 5.09E-45 |
| ZNF207   | -0.37655 | 5.09E-45 |
| RAB5B    | -0.52177 | 5.56E-45 |
| RTN4RL1  | 4.305188 | 5.63E-45 |
| SPATA12  | 1.151104 | 6.01E-45 |
| TOR1AIP2 | -0.57484 | 6.34E-45 |
| GADD45B  | -0.44799 | 6.93E-45 |
| GEM      | 4.40149  | 8.69E-45 |
| PPARGC1B | 2.839068 | 9.42E-45 |
| TRIB2    | 1.074785 | 1.23E-44 |
| C3orf58  | 4.961904 | 1.24E-44 |
| AHNAK2   | 2.214201 | 1.26E-44 |
| CCNT1    | -0.61155 | 1.36E-44 |
| SOWAHB   | 3.05095  | 1.36E-44 |
| PVRL2    | -0.49714 | 1.82E-44 |
| ADRBK2   | 2.157625 | 1.94E-44 |
| CRABP2   | 0.802679 | 1.97E-44 |
| ELFN2    | 1.567816 | 2.33E-44 |
| IFFO2    | 0.836139 | 3.38E-44 |
| YY1AP1   | -0.49691 | 3.88E-44 |
| ZNF35    | -0.847   | 4.56E-44 |
| DDIT3    | -0.91877 | 5.22E-44 |
| RAI2     | 3.355455 | 5.64E-44 |
| AIM1     | 2.022403 | 6.52E-44 |
| NKX2-8   | 4.694615 | 9.77E-44 |
| NDRG4    | 1.090582 | 1.03E-43 |
| MN1      | 2.748593 | 1.17E-43 |
| CTDSP2   | -0.44463 | 1.17E-43 |
| NCEH1    | -0.50723 | 1.51E-43 |
| FBXO28   | -0.56224 | 1.54E-43 |
| TRIB1    | -0.54464 | 1.57E-43 |
| RNF43    | -0.51527 | 2.08E-43 |
| DKK1     | -0.62365 | 2.13E-43 |
| TFIP11   | -0.68587 | 2.43E-43 |
| HIAT1    | -0.58147 | 2.67E-43 |
| RBBP6    | -0.50284 | 2.69E-43 |
| CCND1    | -0.38423 | 3.73E-43 |
| SPTY2D1  | -0.53713 | 4.98E-43 |
| C5orf51  | -0.42671 | 5.26E-43 |

|          |          |          |
|----------|----------|----------|
| KIF5A    | 1.479679 | 7.80E-43 |
| SP9      | 2.10589  | 8.64E-43 |
| ADAM9    | -0.44022 | 9.22E-43 |
| KCTD5    | -0.48145 | 1.07E-42 |
| ARX      | 5.178007 | 1.10E-42 |
| PALLD    | 0.510203 | 1.10E-42 |
| RASAL1   | 1.321277 | 1.28E-42 |
| VLDLR    | 1.886781 | 1.31E-42 |
| AKAP12   | -0.57217 | 1.56E-42 |
| DRAM1    | 1.34536  | 1.62E-42 |
| BRPF1    | -0.68833 | 1.77E-42 |
| ARHGEF18 | -0.47354 | 1.90E-42 |
| GSG2     | -0.93024 | 1.96E-42 |
| QTRTD1   | -0.49441 | 2.12E-42 |
| COL2A1   | 1.449186 | 2.43E-42 |
| ZNF282   | -0.47811 | 2.47E-42 |
| TRA2B    | -0.4323  | 2.49E-42 |
| SEMA7A   | 0.813421 | 2.60E-42 |
| IPPK     | -0.77724 | 2.85E-42 |
| CITED4   | 1.376463 | 3.18E-42 |
| BRD8     | -0.54528 | 4.06E-42 |
| FAM101B  | 0.93029  | 5.26E-42 |
| DNAJB1   | -0.49217 | 7.26E-42 |
| MEIS2    | 0.990606 | 7.52E-42 |
| MAST3    | 0.959477 | 8.59E-42 |
| 9-Mar    | 1.484844 | 9.01E-42 |
| CCNB1    | -0.3854  | 1.20E-41 |
| ZNF185   | 1.146051 | 1.41E-41 |
| HHEX     | 1.061206 | 1.64E-41 |
| AREL1    | -0.60209 | 1.68E-41 |
| SOX18    | 1.518305 | 1.68E-41 |
| ADRM1    | -0.39768 | 1.86E-41 |
| TFCP2L1  | 0.710563 | 1.86E-41 |
| TMEM115  | -0.81738 | 1.94E-41 |
| CDK16    | -0.53489 | 2.19E-41 |
| SF3B4    | -0.52634 | 2.24E-41 |
| BAG5     | -0.53699 | 3.15E-41 |
| ZNF263   | -0.56961 | 3.58E-41 |
| TSKU     | 1.747217 | 3.66E-41 |
| ZDHH5    | -0.44187 | 3.92E-41 |
| TSHZ3    | 5.724154 | 4.05E-41 |
| ZNF830   | -0.85314 | 4.20E-41 |
| NETO2    | 0.549007 | 4.55E-41 |
| LEPREL2  | 1.514665 | 4.59E-41 |
| NIPAL1   | 2.091076 | 4.74E-41 |
| LATS1    | -0.58219 | 5.46E-41 |
| TMEM11   | -0.6574  | 6.47E-41 |

|          |          |          |
|----------|----------|----------|
| MAP2K4   | -0.50081 | 6.87E-41 |
| OXTR     | 1.499511 | 7.23E-41 |
| PAK6     | 1.203789 | 7.43E-41 |
| PDE12    | -0.44726 | 7.63E-41 |
| EP300    | -0.49424 | 7.65E-41 |
| PRKAG2   | 0.896911 | 7.96E-41 |
| NIP7     | -0.42766 | 8.92E-41 |
| MSL2     | -0.54865 | 9.07E-41 |
| ST5      | 0.611847 | 9.22E-41 |
| BRAP     | -0.48317 | 1.03E-40 |
| ID3      | 2.448114 | 1.08E-40 |
| PPP1R14C | 1.487671 | 1.10E-40 |
| BATF2    | 1.860804 | 1.25E-40 |
| CWC25    | -0.57983 | 1.36E-40 |
| CCDC85C  | 0.606302 | 1.55E-40 |
| CCDC174  | -0.54746 | 1.57E-40 |
| SCD5     | 0.797285 | 1.60E-40 |
| SPRY2    | -0.50874 | 1.88E-40 |
| LRRC75A  | 1.297297 | 2.06E-40 |
| SETD1A   | -0.65281 | 2.14E-40 |
| ARHGEF40 | 1.018458 | 2.45E-40 |
| HNRNPA0  | -0.42219 | 2.46E-40 |
| WNT11    | 0.969412 | 3.51E-40 |
| NACAD    | 2.836684 | 3.75E-40 |
| TPPP3    | 1.107745 | 3.75E-40 |
| ZNF853   | 1.375782 | 4.40E-40 |
| BHLHE40  | -0.47416 | 4.61E-40 |
| GPBP1    | -0.48804 | 5.16E-40 |
| NCOA7    | 0.886062 | 6.28E-40 |
| FOXJ1    | 2.105943 | 7.02E-40 |
| HYLS1    | 0.846922 | 7.22E-40 |
| PDLIM1   | 0.679783 | 7.73E-40 |
| CYP1A1   | 1.431245 | 7.74E-40 |
| IRS1     | 0.7552   | 7.79E-40 |
| A4GALT   | 2.700199 | 7.91E-40 |
| C1orf52  | -0.70101 | 8.38E-40 |
| RBM15B   | -0.45697 | 9.22E-40 |
| LHX6     | 0.590979 | 9.36E-40 |
| NUP50    | -0.48839 | 1.16E-39 |
| PAQR7    | 1.417541 | 1.29E-39 |
| MTA2     | -0.40055 | 1.37E-39 |
| RUNDC1   | -0.57301 | 1.39E-39 |
| NIPAL4   | 2.815631 | 1.43E-39 |
| WNT1     | 8.64182  | 1.55E-39 |
| LAMA3    | 0.933389 | 1.65E-39 |
| M6PR     | -0.43035 | 1.84E-39 |
| MAMLD1   | 0.836257 | 1.98E-39 |

|            |          |          |
|------------|----------|----------|
| HLA-B      | 0.658428 | 2.01E-39 |
| ZCCHC8     | -0.54028 | 2.04E-39 |
| LZTS1      | 3.664592 | 2.11E-39 |
| LOC1005066 | 1.029183 | 2.46E-39 |
| FBXO32     | -1.35159 | 2.51E-39 |
| CLCN5      | 0.891698 | 2.63E-39 |
| DCTN5      | -0.45834 | 2.86E-39 |
| YRDC       | -0.52779 | 3.08E-39 |
| IFIT5      | 0.816094 | 3.88E-39 |
| SPTBN2     | 0.536936 | 3.88E-39 |
| ZNF710     | 0.778327 | 4.48E-39 |
| FGD6       | 0.602502 | 4.54E-39 |
| NECAP1     | -0.55867 | 4.86E-39 |
| CHMP1B     | -0.5832  | 5.25E-39 |
| TUSC2      | -0.77811 | 5.49E-39 |
| ASAP3      | 2.029242 | 5.78E-39 |
| TFAP2A     | 1.987363 | 6.15E-39 |
| PLAGL2     | -0.50206 | 7.05E-39 |
| SH3D19     | -0.46952 | 7.28E-39 |
| CRNKL1     | -0.49608 | 7.36E-39 |
| GPR3       | 1.146909 | 9.38E-39 |
| BCAR1      | -0.43694 | 9.72E-39 |
| TUBB4B     | -0.33836 | 1.06E-38 |
| FGFR1OP2   | -0.45697 | 1.19E-38 |
| ATF4       | -0.3416  | 1.31E-38 |
| CCRN4L     | -0.81778 | 1.56E-38 |
| PTPRS      | 1.133607 | 1.57E-38 |
| ITPRIP     | 0.555099 | 1.60E-38 |
| TUBB6      | 0.603882 | 1.61E-38 |
| HSPB8      | 3.908833 | 1.68E-38 |
| FAM102B    | 1.194863 | 2.01E-38 |
| PCK1       | 2.606848 | 2.10E-38 |
| CBLL1      | -0.50831 | 2.17E-38 |
| CHGB       | 0.584853 | 2.22E-38 |
| RPL22L1    | -0.77458 | 2.38E-38 |
| KIF5B      | -0.45586 | 2.39E-38 |
| CLDN23     | 2.433049 | 2.56E-38 |
| MT1G       | 0.660134 | 2.81E-38 |
| SNN        | 1.534534 | 3.19E-38 |
| C15orf39   | 0.656237 | 3.94E-38 |
| AKAP10     | -0.56495 | 6.71E-38 |
| FOXA3      | -0.57188 | 7.22E-38 |
| PDE4D      | -0.45403 | 7.85E-38 |
| FOXO6      | 1.116766 | 8.24E-38 |
| C11orf82   | -0.63421 | 9.28E-38 |
| CXCL6      | 2.10452  | 9.29E-38 |
| BAI2       | 0.668692 | 9.53E-38 |

|           |          |          |
|-----------|----------|----------|
| ETAA1     | -0.67522 | 1.03E-37 |
| ITGA2     | 1.363386 | 1.21E-37 |
| MCL1      | -0.36752 | 1.32E-37 |
| MYEOV     | 1.35073  | 1.38E-37 |
| OCLN      | 0.662656 | 1.61E-37 |
| CAPN5     | 0.783111 | 1.78E-37 |
| DLC1      | 4.158501 | 1.83E-37 |
| TNFRSF12A | -0.45514 | 1.83E-37 |
| KCNMB3    | 0.98259  | 1.98E-37 |
| CDC42SE1  | -0.45753 | 2.16E-37 |
| IFNLR1    | 1.098945 | 2.17E-37 |
| SYNJ1     | -0.59544 | 2.48E-37 |
| ABHD15    | 1.127989 | 2.53E-37 |
| SRC       | 0.574608 | 2.58E-37 |
| PXDC1     | 0.934056 | 2.71E-37 |
| INTS6     | -0.39963 | 3.20E-37 |
| MAML1     | -0.44063 | 3.50E-37 |
| DBF4      | -0.56471 | 3.50E-37 |
| WDR82     | -0.45619 | 3.53E-37 |
| LDLRAP1   | 0.893041 | 3.54E-37 |
| RRAD      | 2.535216 | 3.58E-37 |
| GCC1      | -0.70496 | 3.78E-37 |
| RAF1      | -0.51262 | 3.79E-37 |
| GNE       | 1.400764 | 5.69E-37 |
| FAM103A1  | -0.58489 | 6.11E-37 |
| ZNF184    | 0.636384 | 6.43E-37 |
| ARPC5L    | -0.50083 | 6.68E-37 |
| SEC24A    | -0.55533 | 8.11E-37 |
| CDCA8     | -0.48883 | 1.03E-36 |
| PLXND1    | 0.481918 | 1.07E-36 |
| JDP2      | 1.164271 | 1.10E-36 |
| PDGFA     | -0.68921 | 1.15E-36 |
| TRIM15    | 0.871891 | 1.27E-36 |
| SLCO4A1   | 0.516816 | 1.27E-36 |
| UTP15     | -0.51863 | 1.30E-36 |
| NGRN      | -0.45297 | 1.67E-36 |
| EGR2      | 0.607369 | 2.40E-36 |
| WTAP      | -0.39413 | 2.50E-36 |
| MALL      | 0.78389  | 2.54E-36 |
| KCNS3     | 2.903071 | 2.64E-36 |
| TRMT10C   | -0.72709 | 2.67E-36 |
| MISP      | -0.39756 | 2.71E-36 |
| LATS2     | -0.50456 | 3.00E-36 |
| PPP1R10   | -0.43755 | 3.04E-36 |
| PLAT      | 1.179116 | 3.25E-36 |
| PPP2R5B   | 0.843102 | 3.35E-36 |
| KMT2B     | -0.5961  | 3.44E-36 |

|           |          |          |
|-----------|----------|----------|
| RPRD2     | -0.50519 | 3.61E-36 |
| FZD7      | 1.808157 | 3.72E-36 |
| SHB       | -0.50631 | 4.45E-36 |
| BCL9L     | -0.3559  | 4.64E-36 |
| SFRP4     | 3.485728 | 5.00E-36 |
| MLKL      | 0.545826 | 5.03E-36 |
| UBE2G1    | -0.45719 | 5.05E-36 |
| TRIM29    | 0.534794 | 5.29E-36 |
| NCOA4     | -0.36501 | 5.49E-36 |
| LOC730101 | 0.827151 | 5.80E-36 |
| KDM2A     | -0.44511 | 6.00E-36 |
| TINAGL1   | 0.593221 | 6.01E-36 |
| SLC35E4   | 0.643695 | 6.56E-36 |
| AKAP8L    | -0.51933 | 6.94E-36 |
| IL17RD    | 0.989126 | 7.37E-36 |
| INTS5     | -0.5168  | 7.47E-36 |
| PAPOLG    | -0.58781 | 8.51E-36 |
| POM121C   | -0.45345 | 9.41E-36 |
| POM121    | -0.48185 | 9.79E-36 |
| FEM1A     | -0.55142 | 9.80E-36 |
| TMF1      | -0.44563 | 1.09E-35 |
| MPHOSPH10 | -0.59458 | 1.10E-35 |
| CDC42EP1  | 0.471415 | 1.21E-35 |
| GPATCH3   | -0.76021 | 1.33E-35 |
| OTUD7B    | -0.54446 | 1.45E-35 |
| TTBK1     | 2.936459 | 1.50E-35 |
| PPIL4     | -0.4949  | 1.54E-35 |
| APOLD1    | 1.461141 | 1.71E-35 |
| MALT1     | -0.48959 | 1.74E-35 |
| HIST1H1C  | 0.683163 | 1.94E-35 |
| SLC1A4    | 1.259945 | 1.99E-35 |
| EPHB4     | 1.159036 | 2.11E-35 |
| ZNF697    | -0.49862 | 2.23E-35 |
| WASL      | -0.75184 | 2.41E-35 |
| MEF2D     | -0.61075 | 2.46E-35 |
| EFNB2     | -0.34478 | 2.78E-35 |
| ADORA1    | 2.16436  | 3.01E-35 |
| ADRA2C    | 0.91098  | 3.02E-35 |
| BRIX1     | -0.39192 | 3.33E-35 |
| LEMD3     | -0.64188 | 3.81E-35 |
| DLX2      | 1.038836 | 4.05E-35 |
| ASB8      | -0.55669 | 4.23E-35 |
| FAM43A    | 0.616031 | 4.27E-35 |
| FAM84A    | 8.554732 | 4.34E-35 |
| URB2      | -0.74394 | 4.49E-35 |
| CSRNP3    | 1.132697 | 4.86E-35 |
| CALCB     | 5.934292 | 5.02E-35 |



|          |          |          |
|----------|----------|----------|
| BMP6     | 3.394123 | 5.02E-35 |
| ZNF410   | -0.49368 | 5.23E-35 |
| H6PD     | 0.571631 | 6.69E-35 |
| ETF1     | -0.39492 | 7.03E-35 |
| CYP26A1  | 2.325108 | 7.09E-35 |
| ZNF324   | -0.92327 | 7.41E-35 |
| GJB3     | 1.307089 | 7.65E-35 |
| PRCC     | -0.48842 | 9.07E-35 |
| WDR74    | -0.54249 | 9.20E-35 |
| FZD2     | 2.834122 | 1.11E-34 |
| WDR20    | -0.63313 | 1.15E-34 |
| GSN      | 0.848619 | 1.17E-34 |
| VAMP3    | -0.52451 | 1.17E-34 |
| KDM6A    | -0.44879 | 1.22E-34 |
| MANSC1   | 0.850666 | 1.22E-34 |
| SLC27A2  | 0.742662 | 1.27E-34 |
| ZNF114   | 2.315219 | 1.31E-34 |
| YTHDF3   | -0.41912 | 1.46E-34 |
| GOS2     | 2.395228 | 1.59E-34 |
| CGN      | 0.559853 | 1.68E-34 |
| UHMK1    | -0.43375 | 1.72E-34 |
| PRPF38B  | -0.45753 | 1.83E-34 |
| HERC6    | 0.874811 | 2.00E-34 |
| SRPR     | -0.36956 | 2.34E-34 |
| TNFSF15  | 1.561231 | 2.47E-34 |
| EXOC3    | -0.4591  | 2.83E-34 |
| GJA3     | 2.431466 | 3.23E-34 |
| SLC2A10  | 1.878832 | 3.28E-34 |
| DHX8     | -0.40518 | 4.03E-34 |
| PPARGC1A | 2.265321 | 4.60E-34 |
| IGHMBP2  | -0.50111 | 5.01E-34 |
| MAB21L3  | 0.716989 | 5.07E-34 |
| PTPN22   | 0.743016 | 5.62E-34 |
| MX1      | 1.215588 | 5.63E-34 |
| CPEB2    | 3.195078 | 6.21E-34 |
| CEND1    | 3.751381 | 6.54E-34 |
| SHH      | 3.214881 | 6.95E-34 |
| NOM1     | -0.41283 | 6.98E-34 |
| GLIPR2   | 1.581608 | 7.66E-34 |
| ARIH1    | -0.4179  | 8.53E-34 |
| TMEM221  | 3.114087 | 8.56E-34 |
| CD274    | 2.794073 | 9.94E-34 |
| CENPC    | -0.53714 | 1.02E-33 |
| BUD13    | -0.50282 | 1.04E-33 |
| APBB1    | 0.851263 | 1.09E-33 |
| RPRM     | 8.444598 | 1.42E-33 |
| THSD1    | 1.946311 | 1.43E-33 |

|          |          |          |
|----------|----------|----------|
| SCML2    | 0.807358 | 1.58E-33 |
| USP38    | -0.47046 | 1.92E-33 |
| PLK3     | -0.5455  | 1.92E-33 |
| CANT1    | -0.54673 | 2.12E-33 |
| ARID4A   | -0.41194 | 2.23E-33 |
| NR2E1    | 2.021442 | 2.47E-33 |
| PLAUR    | 1.207485 | 2.67E-33 |
| HCN4     | 5.398803 | 2.72E-33 |
| NR1D1    | -0.7534  | 2.84E-33 |
| TWF1     | -0.45955 | 2.91E-33 |
| CSNK1D   | -0.33607 | 3.05E-33 |
| TMEM9B   | -0.52833 | 3.28E-33 |
| MT1X     | 0.417408 | 3.28E-33 |
| GTF2H1   | -0.45335 | 3.31E-33 |
| C1QTNF6  | 1.287933 | 3.36E-33 |
| SART3    | -0.36826 | 3.42E-33 |
| WIPF3    | 1.700901 | 3.76E-33 |
| PLEKHO2  | 0.552932 | 4.23E-33 |
| MAD2L1BP | -0.57183 | 4.44E-33 |
| HCCS     | -0.43312 | 4.78E-33 |
| CAB39    | -0.42502 | 5.10E-33 |
| MBLAC2   | 1.135424 | 5.22E-33 |
| ST3GAL5  | 1.898464 | 5.60E-33 |
| EPPK1    | 3.05236  | 5.73E-33 |
| KCNH3    | 1.121281 | 6.03E-33 |
| ALDH3B1  | 0.888201 | 6.07E-33 |
| SLC30A1  | -0.3666  | 6.08E-33 |
| SMO      | 1.460246 | 6.47E-33 |
| EPHA1    | 3.487117 | 6.99E-33 |
| RBM22    | -0.41299 | 7.35E-33 |
| NEURL1B  | 1.296689 | 7.87E-33 |
| MED17    | -0.56665 | 8.00E-33 |
| TSPAN15  | 0.498317 | 8.09E-33 |
| MOB3A    | 0.779541 | 8.35E-33 |
| CREB3L2  | 0.534491 | 8.59E-33 |
| RIMKLA   | 1.333878 | 9.43E-33 |
| OLFM1    | 3.322402 | 9.50E-33 |
| ATP2A3   | 1.757927 | 1.02E-32 |
| FGD4     | 0.747003 | 1.23E-32 |
| ZBTB38   | -0.39016 | 1.25E-32 |
| MAFB     | 2.726404 | 1.30E-32 |
| HPS6     | -1.04297 | 1.34E-32 |
| TRA2A    | -0.45065 | 1.34E-32 |
| GAB2     | 0.705408 | 1.43E-32 |
| CBLN1    | 4.012257 | 1.51E-32 |
| FGA      | 1.280034 | 1.54E-32 |
| CACNG4   | 0.492612 | 1.54E-32 |

|           |          |          |
|-----------|----------|----------|
| AFAP1L2   | 0.602149 | 1.57E-32 |
| EPC1      | -0.4067  | 1.57E-32 |
| MXD1      | -0.83912 | 1.60E-32 |
| TUBB2A    | 0.90681  | 1.84E-32 |
| UBE2Z     | -0.41071 | 2.11E-32 |
| MOSPD1    | -0.44169 | 2.17E-32 |
| DNAJA2    | -0.41427 | 2.19E-32 |
| C7orf43   | -0.63086 | 2.27E-32 |
| RABGGTB   | -0.3933  | 2.40E-32 |
| CYTH4     | 1.987002 | 2.45E-32 |
| EFNB1     | 0.5782   | 2.48E-32 |
| AMMECR1L  | -0.45522 | 2.62E-32 |
| FTSJ1     | -0.34866 | 2.71E-32 |
| BAG4      | -0.59079 | 2.77E-32 |
| SRSF6     | -0.34594 | 3.02E-32 |
| SRRM3     | 3.530597 | 3.17E-32 |
| HSPA14    | -0.40916 | 3.32E-32 |
| QRICH1    | -0.42946 | 3.32E-32 |
| SDAD1     | -0.40766 | 3.66E-32 |
| IL4R      | 0.85562  | 3.75E-32 |
| TMEM56    | 0.714083 | 4.18E-32 |
| TMEM127   | -0.53389 | 4.64E-32 |
| WAC       | -0.37117 | 4.77E-32 |
| ZNF266    | -0.61038 | 5.14E-32 |
| PAX5      | 3.047329 | 5.43E-32 |
| LINC00657 | -0.44869 | 6.24E-32 |
| TCHH      | 2.005866 | 6.37E-32 |
| EIF2S1    | -0.34561 | 6.40E-32 |
| SCAF4     | -0.37969 | 6.52E-32 |
| FUBP1     | -0.34765 | 6.52E-32 |
| VMA21     | -0.43474 | 6.98E-32 |
| PPP2CA    | -0.32902 | 7.84E-32 |
| AHRR      | -0.40506 | 7.84E-32 |
| YTHDC1    | -0.35647 | 8.47E-32 |
| LAMC2     | 0.645519 | 8.60E-32 |
| FHL1      | 2.52     | 8.96E-32 |
| KCTD21    | 0.959663 | 1.29E-31 |
| CCDC137   | -0.45203 | 1.34E-31 |
| GNL3      | -0.37378 | 1.42E-31 |
| FNBP4     | -0.36822 | 1.42E-31 |
| CAPRIN2   | 0.772894 | 1.43E-31 |
| MTPAP     | -0.4976  | 1.47E-31 |
| YY1       | -0.42173 | 1.47E-31 |
| ZDHHC22   | 1.299336 | 1.51E-31 |
| DACT1     | 3.618402 | 1.81E-31 |
| MKRN1     | -0.39281 | 1.88E-31 |
| MIR22HG   | -1.27714 | 2.03E-31 |

|           |          |          |
|-----------|----------|----------|
| SRP68     | -0.34196 | 2.03E-31 |
| CLSTN3    | 0.593878 | 2.64E-31 |
| FEN1      | -0.4911  | 2.89E-31 |
| MSX2      | 0.529061 | 2.92E-31 |
| ZFAND5    | -0.35675 | 3.22E-31 |
| C1RL      | 0.658158 | 3.23E-31 |
| SLC46A1   | 0.870261 | 3.29E-31 |
| SOX7      | 1.967184 | 3.41E-31 |
| MATN1-AS1 | 1.045939 | 3.99E-31 |
| CRAMP1L   | -0.61493 | 4.16E-31 |
| TGS1      | -0.44472 | 4.19E-31 |
| MAP6      | 2.533799 | 4.57E-31 |
| RBM24     | 2.80944  | 4.85E-31 |
| BCL6      | 0.68319  | 6.03E-31 |
| SIN3A     | -0.67885 | 6.33E-31 |
| INPP5J    | 1.031656 | 6.34E-31 |
| ZFP36L2   | 0.562607 | 6.52E-31 |
| C2orf49   | -0.64316 | 6.68E-31 |
| SNHG16    | -0.51479 | 7.30E-31 |
| TSR1      | -0.39093 | 7.36E-31 |
| TIAL1     | -0.37389 | 7.43E-31 |
| WSCD1     | 3.438958 | 7.75E-31 |
| OLFML2A   | 1.337034 | 7.85E-31 |
| KDM7A     | -0.44204 | 8.14E-31 |
| SRRM1     | -0.42705 | 8.35E-31 |
| SBNO1     | -0.52287 | 8.53E-31 |
| IL1RAP    | 1.330949 | 8.56E-31 |
| ZNF488    | 1.044797 | 9.10E-31 |
| RASSF7    | -0.51388 | 9.47E-31 |
| WNT5B     | 3.39631  | 1.08E-30 |
| FZD9      | 1.748664 | 1.12E-30 |
| POLR3C    | -0.46203 | 1.17E-30 |
| B3GNT9    | 0.871125 | 1.18E-30 |
| HAGLR     | 2.925274 | 1.22E-30 |
| SNX18     | 0.762659 | 1.56E-30 |
| AP1G1     | -0.39814 | 1.64E-30 |
| C16orf54  | 0.881201 | 1.72E-30 |
| PGM2L1    | 0.680875 | 1.76E-30 |
| LINC00265 | 0.597502 | 1.79E-30 |
| UBE2D3    | -0.36885 | 1.90E-30 |
| PHC2      | -0.39761 | 1.94E-30 |
| UTP3      | -0.53263 | 2.28E-30 |
| MEIS3     | 1.103634 | 2.30E-30 |
| SLC30A7   | -0.6642  | 2.30E-30 |
| HJURP     | -0.54416 | 2.84E-30 |
| GPR114    | 0.746589 | 2.96E-30 |
| CDON      | 1.237642 | 3.07E-30 |

|          |          |          |
|----------|----------|----------|
| NUP153   | -0.40726 | 3.08E-30 |
| ZNF581   | -1.17271 | 3.13E-30 |
| AHDC1    | 0.5428   | 3.25E-30 |
| GPR176   | 3.438297 | 3.32E-30 |
| GJC1     | 1.380997 | 3.67E-30 |
| ZNF654   | -0.54357 | 5.01E-30 |
| SIRT7    | -0.51516 | 5.10E-30 |
| ARID1A   | -0.54634 | 5.13E-30 |
| EFCAB14  | -0.48646 | 5.26E-30 |
| RPUSD2   | -0.76137 | 5.27E-30 |
| ANK1     | 1.143353 | 5.66E-30 |
| ETS2     | 0.405945 | 5.75E-30 |
| RTN4R    | 1.278667 | 6.21E-30 |
| UTP14A   | -0.33982 | 6.21E-30 |
| ZRANB1   | -0.46731 | 7.41E-30 |
| SDC1     | 0.504884 | 8.01E-30 |
| SLC7A6OS | -0.40715 | 8.26E-30 |
| UBOX5    | -0.69508 | 8.65E-30 |
| SPSB1    | 0.646138 | 9.25E-30 |
| SLC25A30 | 0.934297 | 9.51E-30 |
| AKIRIN2  | -0.44349 | 9.75E-30 |
| CCDC136  | 1.037695 | 9.75E-30 |
| DZIP1L   | 1.070864 | 1.01E-29 |
| PHLDA3   | 1.459148 | 1.16E-29 |
| ISM2     | 4.25975  | 1.17E-29 |
| CASP2    | -0.35989 | 1.23E-29 |
| DGAT2    | 0.847469 | 1.26E-29 |
| ACHE     | 3.267661 | 1.35E-29 |
| MTERFD2  | -0.58104 | 1.36E-29 |
| ST14     | 0.846194 | 1.39E-29 |
| PIK3CD   | 0.674781 | 1.49E-29 |
| LHX9     | 2.539111 | 1.55E-29 |
| SEMA4B   | 0.681788 | 1.63E-29 |
| SH2D4A   | 0.771463 | 1.74E-29 |
| LTV1     | -0.40956 | 1.88E-29 |
| VPS11    | -0.45974 | 1.90E-29 |
| EMR2     | 0.487917 | 2.14E-29 |
| MCPH1    | -0.59819 | 2.32E-29 |
| HUNK     | 0.676964 | 2.51E-29 |
| IREB2    | -0.43169 | 2.56E-29 |
| ATXN1L   | -0.53151 | 2.69E-29 |
| RBM7     | -0.43456 | 2.86E-29 |
| ESRP1    | 0.510178 | 3.44E-29 |
| SDHAF2   | -0.50733 | 3.48E-29 |
| KDELR3   | 0.782291 | 3.50E-29 |
| C11orf57 | -0.54357 | 4.13E-29 |
| ICAM1    | 1.317945 | 4.44E-29 |

|          |          |          |
|----------|----------|----------|
| MED15    | -0.42735 | 4.79E-29 |
| F5       | 1.201612 | 5.06E-29 |
| ARF6     | -0.34932 | 5.29E-29 |
| ADAMTS9  | 0.826271 | 5.69E-29 |
| H2AFX    | -0.47428 | 6.08E-29 |
| DTX4     | 3.093565 | 6.51E-29 |
| RND3     | -0.6619  | 6.66E-29 |
| ZNF232   | 0.812063 | 7.53E-29 |
| TRPC1    | 0.94353  | 7.76E-29 |
| MORC4    | 0.509033 | 8.29E-29 |
| DUSP16   | 0.519585 | 8.52E-29 |
| ZDHHC7   | -0.61648 | 8.60E-29 |
| SEMA4F   | 0.803661 | 8.81E-29 |
| PFKFB4   | 0.663165 | 8.95E-29 |
| NDST1    | 0.768709 | 9.60E-29 |
| NHLRC1   | 2.223097 | 1.00E-28 |
| AK6      | -0.57597 | 1.02E-28 |
| PLLP     | 0.532623 | 1.06E-28 |
| BCL10    | -0.49519 | 1.11E-28 |
| MFAP1    | -0.43918 | 1.19E-28 |
| LAT2     | 0.865368 | 1.27E-28 |
| FBXO30   | -0.45475 | 1.31E-28 |
| SLC16A2  | 1.917787 | 1.32E-28 |
| TRERF1   | 0.590998 | 1.35E-28 |
| CD24     | 0.366002 | 1.43E-28 |
| CBX2     | 0.607052 | 1.45E-28 |
| THUMPD1  | -0.4085  | 1.49E-28 |
| PSAPL1   | 2.540254 | 1.59E-28 |
| KITLG    | 1.18877  | 1.60E-28 |
| SMIM3    | 1.178961 | 1.77E-28 |
| GRWD1    | -0.41254 | 1.90E-28 |
| SRSF2    | -0.32059 | 1.94E-28 |
| MIXL1    | 3.157199 | 1.99E-28 |
| LINS     | -0.74036 | 2.12E-28 |
| MTRF1L   | -0.40223 | 2.20E-28 |
| SLC9A7   | 0.623447 | 2.44E-28 |
| GNAZ     | 1.341643 | 2.57E-28 |
| MTF2     | -0.57201 | 2.58E-28 |
| GNG2     | 0.61971  | 2.60E-28 |
| KDM5A    | -0.39495 | 2.72E-28 |
| IP6K2    | -0.41613 | 2.79E-28 |
| PDLIM5   | -0.36076 | 2.81E-28 |
| JMJD6    | -0.43089 | 2.88E-28 |
| BMP5     | -0.61154 | 2.90E-28 |
| LRRRC10B | 6.022919 | 2.99E-28 |
| SURF6    | -0.39096 | 3.05E-28 |
| FRS2     | -0.78868 | 3.15E-28 |

|          |          |          |
|----------|----------|----------|
| NPAT     | -0.5619  | 3.17E-28 |
| DCHS1    | 1.833809 | 3.22E-28 |
| KIF23    | -0.47051 | 3.26E-28 |
| F2R      | 1.927027 | 3.43E-28 |
| EPB41L4B | 0.579732 | 3.53E-28 |
| HES2     | 2.711369 | 4.24E-28 |
| MCIDAS   | 1.534106 | 4.49E-28 |
| PNMA2    | 2.101436 | 4.80E-28 |
| TNFAIP2  | 0.633898 | 5.36E-28 |
| RHOV     | 1.239688 | 5.92E-28 |
| ITK      | 0.628145 | 6.81E-28 |
| ZNF777   | -0.35226 | 6.86E-28 |
| HDX      | 0.82731  | 7.04E-28 |
| RBM43    | 1.837652 | 7.04E-28 |
| TGFB2    | 1.29522  | 7.14E-28 |
| SH3TC2   | 1.041895 | 7.30E-28 |
| PCSK9    | 0.70326  | 7.49E-28 |
| GBX2     | 1.47371  | 8.34E-28 |
| SLFN5    | 1.390018 | 8.40E-28 |
| GORASP2  | -0.3654  | 8.44E-28 |
| NGDN     | -0.44407 | 8.47E-28 |
| WAPAL    | -0.3592  | 8.83E-28 |
| ENC1     | 0.511746 | 9.29E-28 |
| VEZF1    | -0.45664 | 9.95E-28 |
| RANBP10  | -0.32786 | 1.01E-27 |
| TSPAN12  | 1.166725 | 1.03E-27 |
| ACVR1C   | 2.131035 | 1.05E-27 |
| ECT2     | -0.38053 | 1.20E-27 |
| ARL4D    | 0.990592 | 1.33E-27 |
| ARHGEF37 | 2.629303 | 1.47E-27 |
| ZUFSP    | -0.53123 | 1.54E-27 |
| RELA     | -0.35547 | 1.60E-27 |
| C10orf2  | -0.60356 | 1.63E-27 |
| VPS37B   | -0.41472 | 1.63E-27 |
| FLJ32255 | 1.609771 | 1.64E-27 |
| NOP2     | -0.33053 | 1.76E-27 |
| TRIM2    | 0.951952 | 1.91E-27 |
| PVRL1    | 0.442741 | 1.92E-27 |
| TRIM16   | 1.130261 | 1.96E-27 |
| PAG1     | 0.942982 | 2.06E-27 |
| TRAPPC6B | -0.41843 | 2.06E-27 |
| MFAP3L   | 2.836338 | 2.07E-27 |
| DNTTIP2  | -0.3806  | 2.49E-27 |
| P2RY2    | 1.51521  | 2.60E-27 |
| CREB5    | 0.801316 | 2.61E-27 |
| RQCD1    | -0.38171 | 2.74E-27 |
| TM2D2    | -0.54221 | 2.90E-27 |

|          |          |          |
|----------|----------|----------|
| GLI3     | 1.063538 | 3.25E-27 |
| C9orf152 | 0.646771 | 3.36E-27 |
| DOK4     | 0.543198 | 3.81E-27 |
| SPEN     | -0.43588 | 3.81E-27 |
| MON1B    | -0.36078 | 3.85E-27 |
| NPY1R    | 6.254827 | 4.28E-27 |
| ATF7IP   | 0.328366 | 4.80E-27 |
| KIN      | -0.56646 | 4.90E-27 |
| ANKRD28  | -0.44305 | 5.20E-27 |
| WBP11    | -0.33987 | 5.75E-27 |
| MMP24    | 0.807875 | 6.31E-27 |
| NFX1     | -0.3812  | 6.57E-27 |
| RNF182   | 2.758878 | 6.91E-27 |
| TMEM170B | 2.840175 | 6.92E-27 |
| USP51    | 2.052078 | 6.99E-27 |
| HOXD13   | 3.179625 | 7.11E-27 |
| OXR1     | -0.37072 | 7.35E-27 |
| PHLDB1   | 0.39907  | 7.36E-27 |
| SLC35A2  | -0.4426  | 7.48E-27 |
| SLC25A53 | 1.0888   | 7.73E-27 |
| TNFAIP1  | -0.47498 | 7.96E-27 |
| SLC8B1   | 0.824483 | 8.35E-27 |
| DHRS2    | 1.121481 | 8.57E-27 |
| MEPCE    | -0.40154 | 8.64E-27 |
| WDR24    | -0.77029 | 9.07E-27 |
| TOPORS   | -0.55886 | 9.43E-27 |
| ERRFI1   | -0.40014 | 9.50E-27 |
| PRPF4    | -0.40065 | 9.74E-27 |
| DYNC1LI2 | -0.32899 | 9.76E-27 |
| SLC45A3  | 0.768046 | 1.01E-26 |
| TMEM41A  | -0.4983  | 1.03E-26 |
| BEND3    | 0.997266 | 1.04E-26 |
| MIEF1    | -0.39402 | 1.07E-26 |
| TRMT6    | -0.36071 | 1.07E-26 |
| TMOD2    | 1.525415 | 1.12E-26 |
| CELF1    | -0.31461 | 1.27E-26 |
| KLHL18   | -0.4482  | 1.27E-26 |
| GAPVD1   | -0.38792 | 1.33E-26 |
| HCFC1    | -0.43605 | 1.54E-26 |
| CNOT3    | -0.42059 | 1.57E-26 |
| ABT1     | -0.50536 | 1.62E-26 |
| TMEM184C | -0.50726 | 1.64E-26 |
| TRAF3IP2 | 0.558686 | 1.67E-26 |
| STK35    | -0.39371 | 1.68E-26 |
| TRIM11   | -0.38844 | 1.82E-26 |
| HAS2     | -0.6983  | 1.88E-26 |
| CXorf57  | 0.556815 | 1.98E-26 |



|            |          |          |
|------------|----------|----------|
| RFWD3      | -0.3419  | 2.06E-26 |
| SHF        | 0.704699 | 2.09E-26 |
| SFPQ       | -0.29874 | 2.10E-26 |
| STK40      | -0.37989 | 2.23E-26 |
| MRPS2      | -0.41271 | 2.31E-26 |
| RIMS3      | 1.610252 | 2.34E-26 |
| RBM15      | -0.62198 | 2.38E-26 |
| AMD1       | -0.3411  | 2.61E-26 |
| ZBTB43     | -0.85749 | 2.62E-26 |
| FAM110A    | 0.666733 | 2.62E-26 |
| RIOK2      | -0.49713 | 2.64E-26 |
| PHLDB3     | 0.638293 | 2.79E-26 |
| PUM1       | -0.38055 | 2.80E-26 |
| PTPN14     | -0.463   | 2.97E-26 |
| GCC2       | -0.37596 | 3.03E-26 |
| CDK12      | -0.39972 | 3.07E-26 |
| MUL1       | -0.44962 | 3.09E-26 |
| KDM5B      | 0.494002 | 3.36E-26 |
| CSNK1A1    | -0.35252 | 3.37E-26 |
| MED9       | -0.93454 | 3.54E-26 |
| SQLE       | 0.517668 | 3.68E-26 |
| ZPR1       | -0.31474 | 3.69E-26 |
| CHST6      | 1.453928 | 3.83E-26 |
| CEBPZ      | -0.33701 | 4.01E-26 |
| CRYBG3     | 0.602371 | 4.56E-26 |
| IRS2       | 0.394628 | 4.58E-26 |
| ATP8B2     | 1.653233 | 5.21E-26 |
| PPP2R2D    | -0.50483 | 5.27E-26 |
| ELAVL2     | 0.637294 | 5.31E-26 |
| RPP38      | -0.5114  | 5.33E-26 |
| NTF3       | 0.786707 | 5.43E-26 |
| IGF2BP1    | -0.42246 | 5.51E-26 |
| TSPYL1     | -0.43381 | 5.58E-26 |
| LIN54      | -0.59537 | 5.62E-26 |
| LOC1019289 | 0.666226 | 5.64E-26 |
| GPR132     | 0.952988 | 5.95E-26 |
| ZNF532     | 0.51145  | 6.08E-26 |
| C16orf91   | -0.6857  | 6.15E-26 |
| FNDC4      | 2.36778  | 6.16E-26 |
| C2orf72    | 0.918383 | 6.45E-26 |
| HAP1       | 1.486149 | 6.73E-26 |
| NRG2       | 2.702784 | 6.75E-26 |
| CHERP      | -0.38897 | 6.99E-26 |
| SLC10A3    | -0.58365 | 7.70E-26 |
| ARFGAP2    | -0.33362 | 7.71E-26 |
| ABCA3      | 1.303935 | 7.85E-26 |
| TBX1       | 3.022054 | 8.03E-26 |

|            |          |          |
|------------|----------|----------|
| BRF2       | -0.56683 | 8.04E-26 |
| SFSWAP     | -0.42992 | 8.11E-26 |
| S1PR2      | 1.337123 | 8.19E-26 |
| ARRDC3     | -0.39135 | 8.30E-26 |
| CDH3       | 4.108876 | 8.31E-26 |
| TNFRSF1A   | -0.65932 | 8.37E-26 |
| EFNA2      | 1.474749 | 8.72E-26 |
| ISLR2      | 4.271937 | 8.72E-26 |
| ZNF12      | -0.57165 | 8.82E-26 |
| ZNF92      | -0.4835  | 8.89E-26 |
| TJP3       | 2.1702   | 8.93E-26 |
| BFAR       | -0.48009 | 9.27E-26 |
| VDAC2      | -0.31462 | 9.85E-26 |
| LAPTM4A    | -0.47261 | 1.08E-25 |
| EIF4E3     | 1.853034 | 1.08E-25 |
| SCYL1      | -0.4533  | 1.08E-25 |
| RC3H1      | -0.64822 | 1.11E-25 |
| DIDO1      | -0.40227 | 1.12E-25 |
| ARID4B     | -0.46152 | 1.13E-25 |
| ITGB7      | 0.624257 | 1.16E-25 |
| HPSE       | 2.26749  | 1.17E-25 |
| LOC1001290 | 0.393056 | 1.19E-25 |
| CCNK       | -0.3778  | 1.20E-25 |
| ZBTB11     | -0.42797 | 1.22E-25 |
| ZNF267     | -0.63755 | 1.32E-25 |
| ABHD17B    | -0.61433 | 1.36E-25 |
| PPP4R4     | 2.610146 | 1.43E-25 |
| RAB11FIP1  | 0.394857 | 1.47E-25 |
| CCDC12     | -0.54619 | 1.50E-25 |
| ING2       | -0.63154 | 1.51E-25 |
| VSNL1      | 0.535698 | 1.74E-25 |
| EDN2       | 2.497338 | 1.85E-25 |
| PLEKHG2    | 0.428785 | 1.93E-25 |
| IL21R      | 2.865036 | 2.01E-25 |
| WT1        | 0.479546 | 2.02E-25 |
| SREK1      | -0.38786 | 2.05E-25 |
| GPR56      | 0.295875 | 2.08E-25 |
| GLCCI1     | 0.800612 | 2.10E-25 |
| ACACB      | 0.704135 | 2.15E-25 |
| AZIN1      | -0.3165  | 2.40E-25 |
| OGDHL      | 1.655844 | 2.45E-25 |
| SRSF3      | -0.32204 | 2.49E-25 |
| FBXO11     | -0.36472 | 3.05E-25 |
| MSL3P1     | 0.68161  | 3.05E-25 |
| NPEPPS     | -0.32599 | 3.18E-25 |
| SLC20A1    | -0.30211 | 3.22E-25 |
| KDM5C      | -0.3433  | 3.44E-25 |

|           |          |          |
|-----------|----------|----------|
| KCNQ1OT1  | 0.606328 | 3.63E-25 |
| PLOD2     | 0.847602 | 3.74E-25 |
| SEC24C    | -0.33102 | 3.95E-25 |
| APH1B     | 1.217488 | 4.16E-25 |
| ZNF574    | -0.69833 | 4.27E-25 |
| RHOU      | 2.921696 | 4.27E-25 |
| CERS2     | -0.33718 | 4.81E-25 |
| IRF5      | 0.873257 | 4.92E-25 |
| C10orf118 | -0.52619 | 4.94E-25 |
| NAA60     | -0.45038 | 5.05E-25 |
| SEMA4D    | 1.584216 | 5.15E-25 |
| IFRD1     | -0.36073 | 5.36E-25 |
| RFX2      | 0.73172  | 5.89E-25 |
| SMIM15    | -0.34542 | 5.94E-25 |
| NGEF      | 0.693123 | 6.02E-25 |
| CAMK2N2   | 2.062496 | 6.17E-25 |
| FBXL3     | -0.34788 | 6.35E-25 |
| SELT      | -0.43903 | 6.38E-25 |
| PTGS1     | 1.896689 | 6.42E-25 |
| PUM2      | -0.34576 | 6.42E-25 |
| DDAH1     | 0.652128 | 6.52E-25 |
| CBR1      | 0.566062 | 6.64E-25 |
| NKX3-1    | 0.826225 | 6.85E-25 |
| DYRK1A    | -0.51174 | 7.65E-25 |
| SOX1      | 4.46999  | 7.81E-25 |
| OXGR1     | 1.646277 | 7.81E-25 |
| ICAM5     | 1.994045 | 7.85E-25 |
| DLX1      | 1.128516 | 7.86E-25 |
| WTIP      | 0.952714 | 8.38E-25 |
| ONECUT2   | 0.984402 | 8.41E-25 |
| NFATC1    | 1.335021 | 8.66E-25 |
| MAFK      | -0.55799 | 8.75E-25 |
| TTC39A    | 1.447195 | 1.01E-24 |
| COG3      | -0.44776 | 1.01E-24 |
| NR2F2     | 0.403325 | 1.02E-24 |
| CRY2      | -0.61035 | 1.04E-24 |
| PPP6R1    | -0.3452  | 1.04E-24 |
| UBTF      | -0.40263 | 1.21E-24 |
| DDX52     | -0.35235 | 1.22E-24 |
| LRRN4     | 1.321089 | 1.25E-24 |
| TRIM65    | 0.549467 | 1.25E-24 |
| CLK3      | -0.36517 | 1.26E-24 |
| TRAM2     | 0.492181 | 1.34E-24 |
| STC2      | -0.36602 | 1.40E-24 |
| WDR45B    | -0.33394 | 1.44E-24 |
| WFS1      | -0.37128 | 1.53E-24 |
| TMC5      | 0.909531 | 1.55E-24 |

|            |          |          |
|------------|----------|----------|
| STYK1      | 2.255241 | 1.61E-24 |
| HNRNPDL    | -0.27984 | 1.72E-24 |
| LRFN1      | 1.860182 | 1.77E-24 |
| SON        | -0.32813 | 1.84E-24 |
| CFL2       | -0.7855  | 1.89E-24 |
| HK1        | 0.391077 | 1.90E-24 |
| KIAA0753   | -0.41649 | 1.92E-24 |
| L1CAM      | 0.372773 | 2.05E-24 |
| NEXN       | 1.292916 | 2.10E-24 |
| SOX14      | 4.421241 | 2.15E-24 |
| FAM126A    | 0.760783 | 2.20E-24 |
| RGS9       | 1.998462 | 2.39E-24 |
| KLK6       | 0.447269 | 2.41E-24 |
| ZNF441     | -0.49451 | 2.42E-24 |
| JHDM1D-AS1 | 0.816699 | 2.57E-24 |
| CILP2      | 2.26086  | 2.59E-24 |
| BLZF1      | -0.49606 | 2.85E-24 |
| NPTX2      | 3.150892 | 2.86E-24 |
| YAP1       | -0.28985 | 2.88E-24 |
| TAF5       | -0.76113 | 2.99E-24 |
| PCYOX1L    | 0.901546 | 3.00E-24 |
| TSPAN2     | 0.853471 | 3.09E-24 |
| GLS2       | 0.7765   | 3.21E-24 |
| LITAF      | 0.564019 | 3.36E-24 |
| SOGA3      | 0.98493  | 3.37E-24 |
| HOXB13     | 1.034017 | 3.55E-24 |
| CISH       | 1.292575 | 3.75E-24 |
| HOXC5      | 0.74676  | 3.75E-24 |
| SPOCK2     | 1.919518 | 3.78E-24 |
| C2orf81    | 1.021352 | 3.86E-24 |
| PDE5A      | 3.190246 | 4.05E-24 |
| SCN3B      | 1.365965 | 4.07E-24 |
| ZNF778     | -1.04017 | 4.07E-24 |
| HOMER1     | 0.404485 | 4.28E-24 |
| COPS2      | -0.34359 | 4.40E-24 |
| TSC22D2    | -0.41923 | 4.58E-24 |
| NKX2-1     | 0.831597 | 4.61E-24 |
| PPP6C      | -0.3563  | 4.86E-24 |
| XYLT2      | 0.951144 | 4.93E-24 |
| HNF4A      | 0.431937 | 5.16E-24 |
| PRF1       | 0.511658 | 5.16E-24 |
| FAM175B    | -0.45632 | 5.31E-24 |
| DNAJC30    | -0.76943 | 5.78E-24 |
| SORL1      | 0.457071 | 5.86E-24 |
| IRX2       | 1.216395 | 5.94E-24 |
| ZNF202     | -0.47924 | 6.52E-24 |
| RNF111     | -0.46354 | 6.86E-24 |

|           |          |          |
|-----------|----------|----------|
| TMEM87A   | -0.39155 | 6.86E-24 |
| EGR1      | 0.286142 | 7.52E-24 |
| KIAA1586  | -0.5262  | 7.86E-24 |
| CACNA2D4  | 0.458322 | 8.01E-24 |
| KCNJ2     | 2.014863 | 8.28E-24 |
| DNMT3B    | 0.746646 | 8.33E-24 |
| BMP8A     | 2.050226 | 8.49E-24 |
| NOL11     | -0.31368 | 8.50E-24 |
| ATG101    | -0.46961 | 8.51E-24 |
| PALB2     | -0.59132 | 8.51E-24 |
| NUDT16P1  | 1.290814 | 9.06E-24 |
| MRPL46    | -0.50733 | 9.40E-24 |
| TBC1D20   | -0.44751 | 9.41E-24 |
| FAM73B    | -0.54205 | 9.60E-24 |
| SLC16A1   | -0.38845 | 9.84E-24 |
| STEAP2    | 0.601844 | 1.03E-23 |
| GLRX      | 0.709245 | 1.05E-23 |
| FHDC1     | 0.538764 | 1.06E-23 |
| PFN2      | 0.374182 | 1.07E-23 |
| PHRF1     | -0.3499  | 1.12E-23 |
| CALM2     | -0.33627 | 1.14E-23 |
| MRFAP1    | -0.32698 | 1.16E-23 |
| PPP1R3B   | 0.741704 | 1.22E-23 |
| TGFBR3    | 0.807551 | 1.25E-23 |
| KIF21B    | 1.159366 | 1.28E-23 |
| TNFAIP3   | 0.546424 | 1.28E-23 |
| NKX3-2    | 2.661914 | 1.28E-23 |
| SLC22A23  | 1.153946 | 1.32E-23 |
| HTR7P1    | 1.170871 | 1.33E-23 |
| KBTBD11   | 3.752785 | 1.41E-23 |
| DPY19L2P2 | 1.125732 | 1.48E-23 |
| TOMM70A   | -0.3781  | 1.51E-23 |
| ZNF764    | -0.65971 | 1.53E-23 |
| LOXL4     | 0.449275 | 1.54E-23 |
| AFAP1     | 0.733924 | 1.57E-23 |
| RICTOR    | -0.40524 | 1.65E-23 |
| PDK4      | 1.768761 | 1.76E-23 |
| KLF9      | 2.237464 | 1.80E-23 |
| HOXB9     | 0.388382 | 1.82E-23 |
| HKDC1     | 0.830521 | 1.87E-23 |
| ENO2      | 0.371922 | 1.90E-23 |
| CHGA      | 4.150162 | 1.94E-23 |
| ABCF3     | -0.43394 | 1.97E-23 |
| FAM220A   | 0.665451 | 2.01E-23 |
| TRIM47    | 0.561974 | 2.01E-23 |
| CCNL2     | -0.57264 | 2.14E-23 |
| TRAF4     | -0.48505 | 2.19E-23 |

|           |          |          |
|-----------|----------|----------|
| PLEKHH1   | 0.61725  | 2.30E-23 |
| C16orf72  | -0.43361 | 2.98E-23 |
| GALNT6    | 0.563986 | 2.99E-23 |
| RBM33     | -0.41342 | 3.00E-23 |
| RAD23B    | -0.30444 | 3.00E-23 |
| LSM14B    | -0.37989 | 3.13E-23 |
| B4GALNT1  | 1.31446  | 3.15E-23 |
| PPP1R3D   | 0.908352 | 3.23E-23 |
| SUPT6H    | -0.31602 | 3.46E-23 |
| ANKS4B    | 1.482371 | 3.55E-23 |
| SHROOM3   | 0.509148 | 3.65E-23 |
| UBE4A     | -0.32007 | 3.70E-23 |
| MACC1     | -0.37123 | 3.74E-23 |
| SLC7A6    | -0.39711 | 3.87E-23 |
| GABPB1    | -0.49252 | 3.90E-23 |
| ST3GAL2   | 0.432128 | 3.91E-23 |
| POU3F1    | 2.564736 | 3.95E-23 |
| FAM126B   | -0.6927  | 3.98E-23 |
| KLHDC10   | -0.50695 | 4.02E-23 |
| C14orf119 | -0.38108 | 4.09E-23 |
| FRMD4B    | 0.783396 | 4.16E-23 |
| DCUN1D3   | -0.62363 | 4.21E-23 |
| CYP26B1   | 1.975625 | 4.27E-23 |
| NCSTN     | -0.33011 | 4.32E-23 |
| RANBP6    | -0.57766 | 4.77E-23 |
| CNTNAP1   | 1.864448 | 4.84E-23 |
| ABLIM1    | 0.480336 | 5.27E-23 |
| RBBP5     | -0.43923 | 5.28E-23 |
| HR        | 0.864781 | 5.29E-23 |
| RAP2C     | -0.42687 | 5.71E-23 |
| SAFB2     | -0.35021 | 5.77E-23 |
| SYP       | 0.703218 | 5.78E-23 |
| NRBF2     | -0.36154 | 5.86E-23 |
| TAOK2     | -0.38889 | 6.10E-23 |
| SULF2     | 0.432397 | 6.20E-23 |
| ZNF516    | 1.048755 | 6.49E-23 |
| HGS       | -0.35853 | 6.85E-23 |
| JAKMIP2   | 1.709125 | 7.23E-23 |
| TSPAN14   | 0.49711  | 7.23E-23 |
| MED12L    | 1.443781 | 7.66E-23 |
| STAU1     | -0.29469 | 7.75E-23 |
| TBCEL     | -0.54904 | 7.95E-23 |
| BET1L     | -0.32692 | 8.08E-23 |
| TBC1D8B   | 0.977685 | 8.36E-23 |
| ESCO1     | -0.38645 | 8.55E-23 |
| ZNF24     | -0.35139 | 8.55E-23 |
| USP8      | -0.38231 | 8.67E-23 |

|           |          |          |
|-----------|----------|----------|
| FAM91A1   | -0.35191 | 8.71E-23 |
| LDB3      | 1.592517 | 9.10E-23 |
| CHRND     | 0.751115 | 9.34E-23 |
| FBXO5     | -0.48494 | 9.70E-23 |
| CDCP1     | 0.36119  | 1.03E-22 |
| RNF34     | -0.36432 | 1.10E-22 |
| AK4       | 0.918346 | 1.11E-22 |
| PPP1R9B   | 0.429669 | 1.12E-22 |
| TMEM39A   | -0.47475 | 1.14E-22 |
| TLR6      | 2.512687 | 1.14E-22 |
| ELK1      | -0.34178 | 1.17E-22 |
| TMOD1     | 1.28511  | 1.30E-22 |
| H2AFJ     | 0.545738 | 1.30E-22 |
| HOXA13    | 2.70656  | 1.32E-22 |
| RGS2      | 0.695062 | 1.35E-22 |
| DDX6      | -0.39249 | 1.41E-22 |
| SMTN      | -0.37362 | 1.50E-22 |
| CLP1      | -0.97101 | 1.55E-22 |
| ENPP1     | 0.735876 | 1.67E-22 |
| VANGL2    | 1.656498 | 1.72E-22 |
| SLC25A44  | -0.4267  | 1.78E-22 |
| MYADM     | -0.35724 | 1.79E-22 |
| CALHM1    | 2.61227  | 1.80E-22 |
| RBM25     | -0.34223 | 1.81E-22 |
| UBALD1    | -0.44156 | 1.83E-22 |
| NOC3L     | -0.35663 | 1.84E-22 |
| HAUS8     | -0.6069  | 2.12E-22 |
| ACTG1     | -0.29216 | 2.12E-22 |
| CRIM1     | 0.741125 | 2.17E-22 |
| RRN3      | -0.33433 | 2.49E-22 |
| HPS5      | -0.41572 | 2.60E-22 |
| GGA3      | -0.53164 | 2.60E-22 |
| OAS2      | 0.477238 | 2.62E-22 |
| MYL9      | 0.42189  | 2.62E-22 |
| ZNF579    | -0.83327 | 2.74E-22 |
| ATAD1     | -0.333   | 2.75E-22 |
| ALG2      | -0.42866 | 2.96E-22 |
| COMP      | 2.305538 | 3.08E-22 |
| HIST1H2AG | 1.405392 | 3.15E-22 |
| FBRS      | -0.44466 | 3.27E-22 |
| ZNF322    | -0.47365 | 3.27E-22 |
| SLC1A5    | -0.30344 | 3.36E-22 |
| POLR2A    | -0.30404 | 3.36E-22 |
| RAB15     | 0.463153 | 3.40E-22 |
| APBA1     | 2.614105 | 3.44E-22 |
| TADA2B    | -0.55441 | 3.64E-22 |
| KANK1     | 0.474788 | 3.80E-22 |

|          |          |          |
|----------|----------|----------|
| PREX1    | 0.495152 | 3.89E-22 |
| TMEM248  | -0.32024 | 3.90E-22 |
| MAP3K7   | -0.37021 | 4.13E-22 |
| EIF2AK3  | -0.50227 | 4.17E-22 |
| USP15    | -0.34262 | 4.40E-22 |
| TRPV3    | 1.399555 | 4.43E-22 |
| CACNB3   | 0.836425 | 4.45E-22 |
| BOD1     | -0.67285 | 4.63E-22 |
| C1orf27  | -0.39997 | 4.76E-22 |
| RBM34    | -0.33863 | 4.88E-22 |
| HIPK3    | -0.47966 | 5.17E-22 |
| TAF1D    | -0.3277  | 5.18E-22 |
| EIF3J    | -0.30084 | 5.43E-22 |
| ZNF506   | -0.45612 | 5.55E-22 |
| TMEM41B  | -0.33618 | 5.58E-22 |
| BMP8B    | 1.237544 | 5.64E-22 |
| HIF1A    | -0.31326 | 5.64E-22 |
| ADRA1B   | 0.968996 | 5.91E-22 |
| ADAMTS18 | 0.62402  | 5.95E-22 |
| PRDM13   | 3.258101 | 6.25E-22 |
| CEP68    | 0.485933 | 6.30E-22 |
| PGBD5    | 3.071509 | 6.60E-22 |
| SESN3    | 0.43098  | 6.62E-22 |
| SLC30A4  | 1.797065 | 7.01E-22 |
| CXCL16   | 2.026943 | 7.08E-22 |
| HLA-E    | 0.420185 | 7.22E-22 |
| CYTH2    | -0.3867  | 7.26E-22 |
| GPX8     | 0.965212 | 7.52E-22 |
| C7orf31  | 0.745595 | 7.57E-22 |
| TM2D3    | -0.73348 | 7.64E-22 |
| GPRC5A   | 0.818954 | 7.89E-22 |
| RPS6KB1  | -0.38494 | 8.06E-22 |
| FAF2     | -0.32896 | 8.34E-22 |
| ARTN     | 1.236675 | 8.44E-22 |
| SAP30BP  | -0.37514 | 8.76E-22 |
| ELF2     | -0.73822 | 9.17E-22 |
| SBK3     | 0.855798 | 9.36E-22 |
| UGT8     | 0.956802 | 9.50E-22 |
| PRSS23   | -0.36599 | 9.81E-22 |
| UGCG     | -0.65821 | 1.01E-21 |
| PCNXL3   | -0.37596 | 1.03E-21 |
| SUV39H1  | -0.41552 | 1.06E-21 |
| ATP6V1D  | -0.38007 | 1.12E-21 |
| PAFAH1B1 | -0.28901 | 1.19E-21 |
| ETNK1    | -0.27451 | 1.20E-21 |
| TTF1     | -0.42561 | 1.20E-21 |
| ZNF79    | -0.7156  | 1.29E-21 |



|            |          |          |
|------------|----------|----------|
| ECD        | -0.33239 | 1.32E-21 |
| FAS        | 2.244031 | 1.35E-21 |
| RABGEF1    | -0.38298 | 1.40E-21 |
| USP42      | -0.50259 | 1.43E-21 |
| LRRC20     | 0.530972 | 1.44E-21 |
| MGAT2      | -0.44865 | 1.46E-21 |
| PLEKHM1    | -0.45527 | 1.47E-21 |
| TRIM6      | 2.021831 | 1.49E-21 |
| STOM       | 1.094651 | 1.53E-21 |
| CSNK2A2    | -0.34486 | 1.54E-21 |
| IL12A      | 2.592454 | 1.57E-21 |
| ULBP1      | 0.816193 | 1.58E-21 |
| DPF2       | -0.34798 | 1.59E-21 |
| DNAJC25    | -0.5146  | 1.60E-21 |
| KIF13B     | 0.379885 | 1.72E-21 |
| ATOH8      | 2.139356 | 1.75E-21 |
| ACBD3      | -0.36403 | 1.76E-21 |
| NEFH       | 3.036318 | 2.03E-21 |
| NPR1       | 2.902284 | 2.05E-21 |
| ARF4       | -0.31177 | 2.06E-21 |
| GID8       | -0.36298 | 2.06E-21 |
| CUL1       | -0.33685 | 2.07E-21 |
| AHNAK      | 0.497103 | 2.09E-21 |
| IL27RA     | 0.663679 | 2.15E-21 |
| KL         | 2.546912 | 2.20E-21 |
| C19orf26   | 0.999813 | 2.23E-21 |
| HSPA12A    | 0.40048  | 2.30E-21 |
| RAB1A      | -0.33933 | 2.36E-21 |
| MAPK6      | -0.38925 | 2.40E-21 |
| FZR1       | -0.42931 | 2.65E-21 |
| MRAS       | 1.12884  | 2.75E-21 |
| CPLX2      | 1.251703 | 2.75E-21 |
| MBTPS1     | -0.41989 | 2.81E-21 |
| YWHAH      | -0.29848 | 2.82E-21 |
| CECR6      | 1.663406 | 2.86E-21 |
| WDR43      | -0.28737 | 2.96E-21 |
| LOC1019284 | 2.062473 | 3.16E-21 |
| PXYLP1     | 1.389943 | 3.22E-21 |
| LPCAT2     | 0.613121 | 3.24E-21 |
| FBXW7      | -0.69007 | 3.34E-21 |
| PUS3       | -0.52467 | 3.34E-21 |
| TFEB       | 2.37963  | 3.47E-21 |
| GPER1      | 0.616611 | 3.51E-21 |
| KCNF1      | 0.908502 | 3.65E-21 |
| SLC39A14   | 0.29175  | 3.74E-21 |
| RAB14      | -0.34767 | 3.74E-21 |
| RRAGD      | 1.140559 | 3.83E-21 |

|            |          |          |
|------------|----------|----------|
| FTSJ2      | -0.38481 | 3.90E-21 |
| RCE1       | -0.41172 | 4.03E-21 |
| TRMU       | -0.44294 | 4.42E-21 |
| KPNA4      | -0.34487 | 4.54E-21 |
| ST6GAL1    | 0.770262 | 4.61E-21 |
| TNRC6C-AS1 | 1.594563 | 4.70E-21 |
| GYLTL1B    | 0.557853 | 4.91E-21 |
| RPRD1B     | -0.36739 | 4.98E-21 |
| UBE2J2     | -0.37638 | 4.99E-21 |
| ZBTB46     | 0.655188 | 5.18E-21 |
| RAB2A      | -0.42616 | 5.40E-21 |
| AP1S3      | 0.478147 | 5.54E-21 |
| ZNF462     | 2.505668 | 5.87E-21 |
| RSRP1      | -0.48285 | 6.07E-21 |
| STRIP1     | -0.45755 | 6.25E-21 |
| CLIP2      | 0.334988 | 6.32E-21 |
| PPP1R8     | -0.34659 | 6.64E-21 |
| PPM1B      | -0.3818  | 6.79E-21 |
| ZNF821     | 0.890195 | 7.01E-21 |
| SRSF4      | -0.2798  | 7.13E-21 |
| OSER1      | -0.40486 | 7.14E-21 |
| MAPKBP1    | 0.383379 | 7.35E-21 |
| POLR3G     | 0.664591 | 7.49E-21 |
| SEN2       | -0.34289 | 7.52E-21 |
| HOXB3      | -0.47062 | 7.55E-21 |
| ANXA2R     | 1.536282 | 7.57E-21 |
| PTPRF      | 0.465389 | 7.84E-21 |
| ABCF1      | -0.27999 | 7.88E-21 |
| SAR1A      | -0.31682 | 7.88E-21 |
| PEAR1      | 1.108012 | 8.20E-21 |
| SOBP       | 0.784349 | 8.47E-21 |
| CALHM3     | 0.802813 | 8.54E-21 |
| PTGER4     | 1.385932 | 8.67E-21 |
| CWC22      | -0.33826 | 9.07E-21 |
| ARHGEF28   | 0.479685 | 9.11E-21 |
| MTSS1      | 1.46313  | 9.17E-21 |
| NLRC5      | 1.083271 | 9.43E-21 |
| SPRED3     | 0.906515 | 9.54E-21 |
| TRPV4      | 0.749702 | 9.62E-21 |
| GPATCH1    | -0.49985 | 1.03E-20 |
| IST1       | -0.2523  | 1.07E-20 |
| PIAS4      | -0.54251 | 1.12E-20 |
| GJB2       | 2.026813 | 1.13E-20 |
| RPP14      | -0.44009 | 1.18E-20 |
| TBC1D10B   | -0.3838  | 1.20E-20 |
| DUS2       | -0.52221 | 1.21E-20 |
| YIPF5      | -0.42378 | 1.21E-20 |

|           |          |          |
|-----------|----------|----------|
| FGD5      | 0.386254 | 1.22E-20 |
| FAM222A   | 0.437901 | 1.23E-20 |
| PRRT3     | 1.294893 | 1.30E-20 |
| PKDCC     | 3.227336 | 1.30E-20 |
| SOCS3     | 0.766777 | 1.31E-20 |
| THBD      | 2.694949 | 1.36E-20 |
| 3-Sep     | 1.080156 | 1.38E-20 |
| HIVEP3    | 0.720583 | 1.39E-20 |
| EIF4G2    | -0.25854 | 1.45E-20 |
| CHODL     | 1.201176 | 1.49E-20 |
| MIR4697HG | 1.950224 | 1.71E-20 |
| UBN2      | -0.45955 | 1.88E-20 |
| BVES      | 2.929042 | 1.89E-20 |
| DLK2      | 1.476681 | 1.93E-20 |
| GPR63     | 0.82619  | 1.97E-20 |
| PRDM12    | 3.215652 | 2.00E-20 |
| ZNF622    | -0.34433 | 2.06E-20 |
| CCDC94    | -0.52636 | 2.07E-20 |
| GPR124    | 1.953175 | 2.15E-20 |
| FAM115A   | 0.326382 | 2.15E-20 |
| SQSTM1    | -0.29291 | 2.16E-20 |
| BCL11A    | 1.286692 | 2.19E-20 |
| SCARF2    | 1.254253 | 2.27E-20 |
| MYCL      | 1.61549  | 2.27E-20 |
| NIFK      | -0.2942  | 2.32E-20 |
| LURAP1L   | 2.05842  | 2.34E-20 |
| CASC10    | 0.993057 | 2.39E-20 |
| PPP1R37   | -0.42649 | 2.41E-20 |
| CYFIP2    | 0.388061 | 2.44E-20 |
| LSM12     | -0.34862 | 2.47E-20 |
| SCNN1A    | 0.39964  | 2.61E-20 |
| ZBTB49    | -0.56822 | 2.77E-20 |
| IL6R      | 0.827229 | 2.84E-20 |
| ZHX1      | -0.38154 | 2.87E-20 |
| MAPK8IP1  | 0.888711 | 3.03E-20 |
| PSME3     | -0.30514 | 3.09E-20 |
| TMEM136   | 0.511208 | 3.19E-20 |
| FAM174B   | 0.564351 | 3.19E-20 |
| NRXN2     | 3.352466 | 3.21E-20 |
| TBRG4     | -0.30015 | 3.30E-20 |
| GPR126    | 1.15565  | 3.32E-20 |
| NYNRIN    | 2.434259 | 3.40E-20 |
| SEC23IP   | -0.32943 | 3.41E-20 |
| ATP6V1A   | -0.33078 | 3.44E-20 |
| AKNAD1    | 1.177978 | 3.52E-20 |
| CALB2     | 3.215386 | 3.76E-20 |
| CASP3     | -0.34314 | 4.06E-20 |

|             |          |          |
|-------------|----------|----------|
| KIAA1377    | 0.679296 | 4.20E-20 |
| HOXC13      | 0.479214 | 4.25E-20 |
| LRRC8B      | 0.541736 | 4.32E-20 |
| GTF2B       | -0.40037 | 4.33E-20 |
| PTPN13      | 0.953792 | 4.34E-20 |
| DHX38       | -0.3212  | 4.46E-20 |
| SRSF10      | -0.30795 | 4.60E-20 |
| ZNF195      | -0.3957  | 4.60E-20 |
| MAPRE3      | 0.806434 | 4.60E-20 |
| OSGIN1      | 0.615571 | 4.65E-20 |
| ARMC5       | -0.40207 | 4.81E-20 |
| FOXA2       | -0.31937 | 4.84E-20 |
| UMPS        | -0.42565 | 5.04E-20 |
| PRKCQ       | 1.407751 | 5.05E-20 |
| PROSER2     | 0.597312 | 5.59E-20 |
| STARD7      | -0.29277 | 5.64E-20 |
| RBM11       | 2.468924 | 5.67E-20 |
| SCAF8       | -0.29483 | 5.71E-20 |
| PI4KB       | -0.30766 | 5.79E-20 |
| MMADHC      | -0.33135 | 5.83E-20 |
| DSC2        | 2.00126  | 6.02E-20 |
| ZBTB14      | 0.61304  | 6.18E-20 |
| KIF18A      | -0.33432 | 6.27E-20 |
| PTGER4P2-CI | 1.00552  | 6.27E-20 |
| XAB2        | -0.36416 | 6.34E-20 |
| DUSP15      | 2.691685 | 6.42E-20 |
| CD58        | 0.671473 | 6.52E-20 |
| SPSB4       | 3.243006 | 6.54E-20 |
| GOSR1       | -0.36393 | 6.86E-20 |
| SLC44A1     | 0.474265 | 6.95E-20 |
| DGKA        | 1.113653 | 7.18E-20 |
| RAB18       | -0.34762 | 7.34E-20 |
| HNRNPH3     | -0.26413 | 7.43E-20 |
| MIDN        | -0.33109 | 7.49E-20 |
| VASH1       | 1.35031  | 7.49E-20 |
| C6orf47     | -0.68643 | 7.54E-20 |
| TLL2        | 2.907552 | 7.54E-20 |
| FAM168A     | 0.345402 | 8.19E-20 |
| SCG2        | 0.406796 | 8.23E-20 |
| ZNF606      | 0.809016 | 8.59E-20 |
| KLHL5       | -0.37687 | 8.82E-20 |
| FAM76B      | -0.37786 | 9.22E-20 |
| ANKRD33B    | 1.801422 | 9.53E-20 |
| RMDN3       | -0.42687 | 9.68E-20 |
| CXorf40A    | -0.64364 | 9.70E-20 |
| TICAM1      | 0.643023 | 1.05E-19 |
| MED21       | -0.41052 | 1.15E-19 |

|            |          |          |
|------------|----------|----------|
| CLPX       | -0.44675 | 1.15E-19 |
| SLU7       | -0.34973 | 1.20E-19 |
| RNF213     | 0.491716 | 1.23E-19 |
| LEPREL4    | 0.567708 | 1.23E-19 |
| GALNT12    | 0.884728 | 1.25E-19 |
| LETM2      | 0.576676 | 1.28E-19 |
| SLC39A9    | -0.38284 | 1.29E-19 |
| MLH3       | 0.418735 | 1.41E-19 |
| CDKL2      | 2.064417 | 1.45E-19 |
| HLX        | 2.752923 | 1.49E-19 |
| TRIM9      | 0.80832  | 1.51E-19 |
| KCMF1      | -0.36367 | 1.53E-19 |
| TRIM71     | 1.908586 | 1.55E-19 |
| MYH10      | 0.275552 | 1.58E-19 |
| MRGPRF     | 1.660237 | 1.59E-19 |
| KIF3A      | 0.514346 | 1.76E-19 |
| HIPK1      | -0.39485 | 1.82E-19 |
| MAEA       | -0.38342 | 1.87E-19 |
| ANKS6      | 0.403406 | 1.89E-19 |
| RAB36      | 0.69988  | 1.89E-19 |
| HCFC2      | -0.54671 | 1.90E-19 |
| PPP2R2C    | -0.43456 | 1.93E-19 |
| MRPS18B    | -0.39447 | 1.95E-19 |
| ATG9A      | -0.49239 | 1.97E-19 |
| INPP5F     | 0.438771 | 2.07E-19 |
| CNOT6L     | -0.42344 | 2.14E-19 |
| PAFAH1B2   | -0.32999 | 2.18E-19 |
| GPATCH8    | -0.32684 | 2.29E-19 |
| MRC2       | 2.023703 | 2.30E-19 |
| TDG        | -0.35047 | 2.35E-19 |
| SMIM10     | 0.647144 | 2.35E-19 |
| SPATA5L1   | -0.38156 | 2.38E-19 |
| ADM2       | 1.602263 | 2.46E-19 |
| AIF1L      | 0.420692 | 2.47E-19 |
| ZFP91      | -0.39903 | 2.49E-19 |
| SEC14L2    | 0.677599 | 2.62E-19 |
| SP3        | -0.29181 | 2.65E-19 |
| GTF2E1     | -0.49981 | 2.85E-19 |
| ATF2       | -0.38497 | 2.86E-19 |
| PLCH1      | 0.732312 | 2.94E-19 |
| GAS2L1     | 0.679669 | 2.97E-19 |
| TLK2       | -0.29168 | 3.04E-19 |
| FAM134B    | 1.699119 | 3.13E-19 |
| GTF2F1     | -0.26445 | 3.22E-19 |
| ATP6V0E2-A | 1.160278 | 3.34E-19 |
| COIL       | -0.43668 | 3.44E-19 |
| EDC4       | -0.2796  | 3.46E-19 |

|          |          |          |
|----------|----------|----------|
| GBP2     | 1.880179 | 3.61E-19 |
| PCYT1B   | 0.849014 | 3.63E-19 |
| C3orf80  | 2.560611 | 3.64E-19 |
| GRPEL2   | -0.45578 | 3.70E-19 |
| DHFRL1   | 0.678038 | 3.75E-19 |
| CORO1A   | 0.81096  | 3.79E-19 |
| PWWP2B   | 1.246098 | 4.05E-19 |
| ZBTB47   | 1.129378 | 4.15E-19 |
| RND1     | 0.535156 | 4.16E-19 |
| LRP11    | 0.474258 | 4.17E-19 |
| KRT81    | 0.534737 | 4.17E-19 |
| CLGN     | 1.595441 | 4.17E-19 |
| USP36    | -0.389   | 4.21E-19 |
| FAM160A2 | -0.39274 | 4.25E-19 |
| SH3BP5   | 0.49622  | 4.26E-19 |
| THY1     | 1.741092 | 4.27E-19 |
| GIGYF2   | -0.35027 | 4.37E-19 |
| ZHX2     | 0.567881 | 4.45E-19 |
| FOSB     | -0.35194 | 4.60E-19 |
| EVA1A    | 1.075825 | 4.69E-19 |
| ITPRIPL1 | 0.88258  | 4.71E-19 |
| ARHGEF7  | -0.31487 | 4.83E-19 |
| SMAD7    | -0.74549 | 4.83E-19 |
| BCOR     | 0.321742 | 4.83E-19 |
| ATG2A    | -0.39034 | 4.84E-19 |
| EIF3A    | -0.29835 | 4.90E-19 |
| HS1BP3   | 0.678765 | 4.90E-19 |
| KAT5     | -0.2986  | 4.94E-19 |
| HEY1     | 1.595775 | 4.97E-19 |
| MUC13    | 0.732041 | 5.15E-19 |
| ZNF469   | 1.110303 | 5.37E-19 |
| SERPINA1 | 0.61532  | 5.39E-19 |
| LSG1     | -0.27963 | 5.40E-19 |
| GNAI1    | -0.42602 | 5.68E-19 |
| ULBP2    | 0.714931 | 5.71E-19 |
| SLC7A4   | 1.095726 | 5.73E-19 |
| C1orf226 | 0.647024 | 5.78E-19 |
| SLC30A5  | -0.33021 | 5.84E-19 |
| VWF      | 1.674086 | 6.06E-19 |
| SATB2    | 0.73374  | 6.12E-19 |
| LRRC8A   | -0.291   | 6.13E-19 |
| DGCR14   | -0.4741  | 6.32E-19 |
| TAGLN3   | 1.981721 | 6.46E-19 |
| ZBTB4    | -0.33976 | 6.59E-19 |
| MTUS1    | 1.286521 | 6.71E-19 |
| BRPF3    | -0.2949  | 7.06E-19 |
| FBXO42   | -0.45292 | 7.13E-19 |

|           |          |          |
|-----------|----------|----------|
| FBXO41    | 0.59172  | 7.35E-19 |
| TESK1     | -0.63133 | 7.37E-19 |
| ARMCX5    | -0.39214 | 7.73E-19 |
| TTC3P1    | 1.364774 | 7.85E-19 |
| HIST2H2BE | 0.400182 | 7.86E-19 |
| TOB2P1    | 1.343616 | 7.92E-19 |
| GSK3A     | -0.33068 | 8.13E-19 |
| KAT7      | -0.36128 | 8.31E-19 |
| ZDHHC1    | 1.13057  | 8.40E-19 |
| LAPTM5    | 0.765267 | 8.49E-19 |
| HOXB8     | -0.54748 | 8.60E-19 |
| ARL5B     | -0.45332 | 8.71E-19 |
| CDC37L1   | -0.58813 | 8.75E-19 |
| DAXX      | -0.39778 | 8.92E-19 |
| PRPF3     | -0.32228 | 8.93E-19 |
| C11orf30  | -0.44125 | 9.04E-19 |
| TGFBR2    | -0.32845 | 9.71E-19 |
| ZFP3      | 0.910846 | 1.07E-18 |
| RNF25     | -0.44053 | 1.07E-18 |
| LINC01137 | 1.601213 | 1.08E-18 |
| SF3B1     | -0.25107 | 1.13E-18 |
| RXRA      | 0.548705 | 1.14E-18 |
| PTGFRN    | 0.581976 | 1.20E-18 |
| SSTR1     | 1.312247 | 1.21E-18 |
| MFN2      | -0.27552 | 1.22E-18 |
| AMPD3     | 0.55424  | 1.25E-18 |
| EFNA4     | 2.57532  | 1.31E-18 |
| PPM1D     | -0.40087 | 1.35E-18 |
| HMOX1     | 0.951595 | 1.36E-18 |
| RNMT      | -0.37483 | 1.39E-18 |
| PLEKHA3   | -0.54331 | 1.46E-18 |
| HID1      | 0.527459 | 1.50E-18 |
| MARK3     | -0.32954 | 1.51E-18 |
| NRN1      | 1.894431 | 1.51E-18 |
| C1orf116  | -0.36284 | 1.55E-18 |
| FAM160B1  | -0.69495 | 1.59E-18 |
| PIGA      | -0.40924 | 1.64E-18 |
| ADNP      | -0.28563 | 1.66E-18 |
| ZMYND8    | -0.2663  | 1.73E-18 |
| ZNF354A   | 0.803851 | 1.76E-18 |
| DPYSL2    | 0.414326 | 1.83E-18 |
| GIPR      | 2.091736 | 1.91E-18 |
| PTP4A1    | -0.27873 | 1.95E-18 |
| VASP      | -0.2695  | 1.98E-18 |
| GPRIN1    | 0.428574 | 2.00E-18 |
| TEAD3     | 0.577421 | 2.03E-18 |
| LPAR5     | 0.98885  | 2.04E-18 |

|          |          |          |
|----------|----------|----------|
| CDK7     | -0.37442 | 2.05E-18 |
| DDX42    | -0.24047 | 2.08E-18 |
| USP22    | -0.27028 | 2.14E-18 |
| THEM6    | 0.466377 | 2.19E-18 |
| NXPE3    | 0.853665 | 2.28E-18 |
| NBR1     | -0.31774 | 2.29E-18 |
| SURF4    | -0.2751  | 2.35E-18 |
| DDX23    | -0.26548 | 2.36E-18 |
| PRSS35   | 2.892203 | 2.41E-18 |
| ADPRH    | 0.95807  | 2.55E-18 |
| TCFL5    | 0.582412 | 2.56E-18 |
| CCNJ     | -0.61261 | 2.67E-18 |
| ADAMTSL5 | 0.640777 | 2.86E-18 |
| G2E3     | -0.40468 | 2.86E-18 |
| HSPG2    | 0.334003 | 2.91E-18 |
| C1QTNF1  | 0.626898 | 2.92E-18 |
| TACO1    | -0.38803 | 2.92E-18 |
| MED8     | -0.43541 | 2.95E-18 |
| PDP2     | 0.431913 | 3.13E-18 |
| P4HA1    | 0.337763 | 3.22E-18 |
| CEP76    | -0.52491 | 3.35E-18 |
| KLF4     | 0.707719 | 3.43E-18 |
| NRBP1    | -0.29791 | 3.48E-18 |
| EIF2B2   | -0.29858 | 3.51E-18 |
| PHF12    | -0.40283 | 3.74E-18 |
| TNKS1BP1 | 0.302686 | 3.78E-18 |
| NCR3LG1  | 0.753519 | 4.04E-18 |
| MAK16    | -0.39797 | 4.06E-18 |
| HUS1     | -0.31785 | 4.07E-18 |
| BNIP2    | -0.4465  | 4.09E-18 |
| SDF2     | -0.48536 | 4.14E-18 |
| SOGA1    | 0.573916 | 4.15E-18 |
| CCT6P3   | -0.454   | 4.22E-18 |
| ERBB3    | 0.334739 | 4.27E-18 |
| CDYL     | 0.432235 | 4.28E-18 |
| ZNF641   | 0.444994 | 4.28E-18 |
| CTSL     | 0.680703 | 4.30E-18 |
| NFAT5    | -0.46163 | 4.45E-18 |
| STARD8   | 1.817138 | 4.54E-18 |
| C2CD2L   | -0.39333 | 4.55E-18 |
| TGIF1    | -0.5356  | 4.66E-18 |
| ABTB2    | 0.376996 | 4.93E-18 |
| FUT4     | -0.4291  | 4.94E-18 |
| WWTR1    | 0.452853 | 4.98E-18 |
| DCLK1    | 1.244452 | 4.99E-18 |
| GLI2     | 2.35425  | 5.31E-18 |
| RARG     | 0.579736 | 5.45E-18 |



|           |          |          |
|-----------|----------|----------|
| CD83      | 0.856372 | 5.57E-18 |
| LGR4      | 0.625637 | 5.67E-18 |
| HNRNPUL1  | -0.22329 | 5.72E-18 |
| ADPRHL2   | -0.37958 | 5.73E-18 |
| ACOT4     | 1.093926 | 5.83E-18 |
| ZC3H3     | -0.52386 | 5.83E-18 |
| ZNF281    | -0.33227 | 5.90E-18 |
| CDYL2     | 0.797062 | 5.98E-18 |
| FBXW11    | -0.34706 | 6.02E-18 |
| TNFRSF11B | 1.901392 | 6.02E-18 |
| TIMM23B   | -0.3953  | 6.04E-18 |
| TSC22D3   | 0.641262 | 6.08E-18 |
| LOC284023 | 0.73136  | 6.16E-18 |
| MTERF     | -0.37919 | 6.58E-18 |
| CCNG1     | -0.36468 | 6.76E-18 |
| CRMP1     | 0.43453  | 6.83E-18 |
| LRP1      | 0.831903 | 6.95E-18 |
| PTPN1     | -0.26494 | 7.05E-18 |
| BLACAT1   | 1.296651 | 7.55E-18 |
| AP3M1     | -0.26861 | 7.65E-18 |
| REXO1     | -0.42712 | 7.69E-18 |
| MAST1     | 1.046696 | 7.75E-18 |
| PDHX      | -0.32828 | 8.07E-18 |
| MPZL1     | 0.296553 | 8.10E-18 |
| TACC2     | 0.349536 | 8.29E-18 |
| KCNC3     | 2.814989 | 8.32E-18 |
| DLG5-AS1  | 1.395825 | 8.43E-18 |
| MICA      | 0.572704 | 8.62E-18 |
| ZC3H6     | 0.61974  | 8.88E-18 |
| PPM1K     | 0.770282 | 8.89E-18 |
| RPP25     | 0.531113 | 9.09E-18 |
| TIMM22    | -0.33806 | 9.14E-18 |
| CD164     | -0.32857 | 9.14E-18 |
| SEMA3A    | -0.29898 | 9.31E-18 |
| FAM171A2  | 0.831231 | 9.52E-18 |
| REST      | -0.38097 | 9.58E-18 |
| SLC38A4   | 1.210758 | 9.80E-18 |
| CPSF7     | -0.24186 | 1.02E-17 |
| FAM193A   | -0.31491 | 1.06E-17 |
| HSPA4     | -0.25766 | 1.07E-17 |
| FRAS1     | 0.449975 | 1.08E-17 |
| FBXO33    | -0.47303 | 1.11E-17 |
| DSEL      | 1.184321 | 1.11E-17 |
| KIAA1522  | 0.391772 | 1.11E-17 |
| TSLP      | 2.537627 | 1.14E-17 |
| SEMA6A    | 0.67873  | 1.17E-17 |
| DNAJC2    | -0.30297 | 1.18E-17 |

|           |          |          |
|-----------|----------|----------|
| CPNE2     | 0.462706 | 1.18E-17 |
| ANKLE2    | -0.37688 | 1.22E-17 |
| TMEM98    | 0.963404 | 1.23E-17 |
| ZC3H12C   | 0.451703 | 1.23E-17 |
| NOB1      | -0.24081 | 1.30E-17 |
| USP6NL    | -0.53475 | 1.30E-17 |
| SMIM24    | 2.556496 | 1.31E-17 |
| BTBD3     | 0.301256 | 1.42E-17 |
| NABP1     | -0.64614 | 1.46E-17 |
| AGBL2     | 1.046203 | 1.48E-17 |
| ZNF280C   | 0.325889 | 1.52E-17 |
| CYP1B1    | 1.059321 | 1.52E-17 |
| DOCK3     | 0.890892 | 1.53E-17 |
| AKT1S1    | -0.55045 | 1.53E-17 |
| VCP       | -0.25435 | 1.63E-17 |
| NAA50     | -0.26148 | 1.63E-17 |
| 4-Sep     | 1.345843 | 1.64E-17 |
| ARHGAP18  | -0.27042 | 1.66E-17 |
| TRIM23    | -0.52506 | 1.72E-17 |
| MLF1      | 0.982065 | 1.82E-17 |
| ZNF800    | -0.49828 | 1.84E-17 |
| LEPREL1   | 0.911034 | 1.86E-17 |
| AMN       | 2.169609 | 1.86E-17 |
| CHAMP1    | -0.28616 | 1.88E-17 |
| PDGFRB    | 1.499995 | 1.93E-17 |
| GRPEL1    | -0.32039 | 2.00E-17 |
| FBXO38    | -0.37671 | 2.02E-17 |
| TRIM7     | 1.210528 | 2.11E-17 |
| RBAK      | -0.41097 | 2.13E-17 |
| DPM1      | -0.27706 | 2.15E-17 |
| ARVCF     | 0.656341 | 2.22E-17 |
| OSBPL6    | 1.110621 | 2.22E-17 |
| SHISA9    | 0.308957 | 2.25E-17 |
| ENPP5     | 2.59631  | 2.30E-17 |
| CCDC97    | -0.31666 | 2.33E-17 |
| C14orf132 | 1.136583 | 2.33E-17 |
| ITCH      | -0.26307 | 2.39E-17 |
| EPC2      | -0.35076 | 2.44E-17 |
| SHISA2    | 2.977977 | 2.48E-17 |
| TSN       | -0.3003  | 2.57E-17 |
| MAP10     | 2.488348 | 2.64E-17 |
| ATP2A2    | -0.2792  | 2.66E-17 |
| RPS6KB2   | -0.31597 | 2.69E-17 |
| ENDOD1    | 0.438742 | 2.70E-17 |
| IGFBPL1   | 0.691923 | 2.72E-17 |
| VPS4A     | -0.24259 | 2.84E-17 |
| KIAA0040  | 0.524139 | 2.88E-17 |

|            |          |          |
|------------|----------|----------|
| NKIRAS2    | -0.34387 | 2.89E-17 |
| CRISPLD2   | 1.113341 | 3.02E-17 |
| SAMD1      | 0.575511 | 3.05E-17 |
| RHOBTB1    | 0.856774 | 3.11E-17 |
| JUP        | 0.277769 | 3.22E-17 |
| TNFAIP8    | 1.018189 | 3.30E-17 |
| PHC1       | 0.417472 | 3.37E-17 |
| EXOSC6     | -0.36291 | 3.38E-17 |
| CDC42BPG   | 0.715694 | 3.38E-17 |
| MAP3K12    | 1.290181 | 3.41E-17 |
| ARHGAP11A  | -0.31777 | 3.45E-17 |
| ZNF709     | 1.068729 | 3.64E-17 |
| TCEAL3     | 0.773258 | 3.69E-17 |
| ZNF540     | 1.628337 | 3.74E-17 |
| UBAP2L     | -0.27443 | 3.74E-17 |
| SNX16      | 0.737921 | 3.90E-17 |
| POLQ       | -0.48359 | 3.92E-17 |
| TPST1      | 0.476747 | 3.93E-17 |
| CTDSP1     | -0.35254 | 3.94E-17 |
| GUCD1      | -0.36879 | 4.12E-17 |
| TRIM37     | -0.38465 | 4.35E-17 |
| SEC16A     | -0.27445 | 4.44E-17 |
| HEXIM1     | -0.27708 | 4.61E-17 |
| CENPQ      | -0.80942 | 4.65E-17 |
| GTF2A1     | -0.36998 | 4.69E-17 |
| LOC1001312 | 0.539545 | 4.69E-17 |
| C8orf33    | -0.2868  | 4.87E-17 |
| LRP12      | 0.732978 | 4.95E-17 |
| KIF3C      | 0.353661 | 4.96E-17 |
| TRIM46     | 1.918877 | 4.96E-17 |
| CDK9       | -0.3756  | 5.00E-17 |
| RUNX2      | 1.033551 | 5.01E-17 |
| MYSM1      | -0.31763 | 5.10E-17 |
| IFNAR2     | 0.658843 | 5.24E-17 |
| RECK       | 1.070445 | 5.31E-17 |
| SOX5       | 0.618343 | 5.44E-17 |
| NCMAP      | 2.08042  | 5.46E-17 |
| IL6ST      | -0.31328 | 5.48E-17 |
| CMTM4      | 0.551844 | 5.50E-17 |
| NRAS       | -0.30937 | 5.69E-17 |
| MAPK8IP2   | 2.166961 | 5.87E-17 |
| SNX33      | 0.712323 | 5.87E-17 |
| SPN        | 0.460869 | 6.08E-17 |
| PRR18      | 1.911289 | 6.08E-17 |
| ZNF485     | 0.878679 | 6.19E-17 |
| CHPF2      | -0.39552 | 6.59E-17 |
| MRPL49     | -0.32707 | 6.62E-17 |

|          |          |          |
|----------|----------|----------|
| USP10    | -0.27615 | 6.64E-17 |
| TBC1D1   | 0.38228  | 6.87E-17 |
| SMEK2    | -0.34697 | 6.92E-17 |
| ITPR1    | 0.77925  | 7.33E-17 |
| ADCY1    | 2.064045 | 7.39E-17 |
| TRIP11   | -0.38761 | 7.44E-17 |
| BRSK1    | 1.141657 | 7.57E-17 |
| IKBKG    | -0.38169 | 7.59E-17 |
| HS3ST3B1 | 1.603244 | 7.72E-17 |
| SLC30A6  | -0.37138 | 8.03E-17 |
| GOLPH3   | -0.27847 | 8.10E-17 |
| ARHGEF10 | 0.479963 | 8.11E-17 |
| CYB5D1   | -0.46048 | 8.11E-17 |
| FZD6     | 0.414806 | 8.30E-17 |
| JPH3     | 1.279543 | 8.53E-17 |
| FAM13C   | 0.82618  | 8.63E-17 |
| NSUN2    | -0.23254 | 8.65E-17 |
| BRD4     | -0.35391 | 8.75E-17 |
| INO80D   | -0.43181 | 9.04E-17 |
| TMEM200B | 2.554505 | 9.20E-17 |
| RAB10    | -0.26103 | 9.65E-17 |
| FLJ25758 | 2.988309 | 9.83E-17 |
| CAPRIN1  | -0.23545 | 9.85E-17 |
| RAB22A   | -0.41123 | 1.00E-16 |
| 7-Mar    | -0.26472 | 1.01E-16 |
| CACTIN   | -0.3678  | 1.04E-16 |
| TTC30B   | 1.236653 | 1.05E-16 |
| POLR2D   | -0.33776 | 1.09E-16 |
| PARP12   | 0.644221 | 1.09E-16 |
| ATP8B3   | 0.888911 | 1.16E-16 |
| KRT17    | 0.752997 | 1.20E-16 |
| MAP4K5   | -0.29598 | 1.20E-16 |
| KLHL20   | -0.4796  | 1.22E-16 |
| CCDC69   | 1.150176 | 1.22E-16 |
| CREB3L1  | 2.296996 | 1.23E-16 |
| TOX4     | -0.29188 | 1.23E-16 |
| MRPL50   | -0.49587 | 1.23E-16 |
| IL22RA1  | 1.444702 | 1.23E-16 |
| FAM132B  | 0.926533 | 1.24E-16 |
| ID1      | -0.6001  | 1.25E-16 |
| ARG2     | 0.469733 | 1.29E-16 |
| SACM1L   | -0.39754 | 1.29E-16 |
| ARFGAP1  | -0.2986  | 1.32E-16 |
| HIST1H1E | 1.161177 | 1.41E-16 |
| TM9SF3   | -0.27917 | 1.42E-16 |
| NPL      | 0.934424 | 1.44E-16 |
| ZNF17    | -0.72357 | 1.58E-16 |

|           |          |          |
|-----------|----------|----------|
| MAP3K1    | -0.34231 | 1.60E-16 |
| MGAT3     | 0.837763 | 1.61E-16 |
| GPATCH11  | -0.34324 | 1.64E-16 |
| ZCCHC10   | -0.44412 | 1.69E-16 |
| C2orf47   | -0.54305 | 1.69E-16 |
| RNF26     | -0.37454 | 1.70E-16 |
| GPR162    | 1.785216 | 1.71E-16 |
| CDIP1     | 1.346101 | 1.79E-16 |
| SYNGR3    | 2.523736 | 1.79E-16 |
| ZNF317    | -0.31969 | 1.79E-16 |
| SAP130    | -0.3608  | 1.81E-16 |
| TBKBP1    | 1.086427 | 1.83E-16 |
| TBC1D23   | -0.31661 | 1.85E-16 |
| ALKBH1    | -0.375   | 1.95E-16 |
| VPS18     | -0.4684  | 2.03E-16 |
| PTPDC1    | 0.624108 | 2.04E-16 |
| ZSWIM8    | -0.31627 | 2.06E-16 |
| SAFB      | -0.26432 | 2.12E-16 |
| UBALD2    | -0.43922 | 2.30E-16 |
| UBAP1     | -0.30563 | 2.32E-16 |
| ATP8B1    | 0.666746 | 2.35E-16 |
| SCYL2     | -0.30084 | 2.35E-16 |
| PMM2      | -0.29392 | 2.42E-16 |
| FBXO31    | -0.44159 | 2.47E-16 |
| TIGD2     | 0.880248 | 2.53E-16 |
| LRFN3     | 1.792989 | 2.56E-16 |
| DSCAML1   | 1.676236 | 2.57E-16 |
| NTRK2     | 0.644508 | 2.63E-16 |
| ELK3      | 0.722801 | 2.67E-16 |
| WBP1L     | -0.43524 | 2.70E-16 |
| CYP2R1    | 0.767668 | 2.74E-16 |
| PTRH2     | -0.51743 | 2.77E-16 |
| CWC15     | -0.40832 | 2.82E-16 |
| OAS3      | 0.358557 | 2.88E-16 |
| USP1      | -0.28736 | 2.94E-16 |
| IDI1      | -0.34413 | 2.95E-16 |
| TRAPPC10  | -0.31893 | 2.97E-16 |
| C1orf106  | 0.393518 | 3.02E-16 |
| STX5      | -0.42106 | 3.11E-16 |
| LHX4      | 2.043437 | 3.21E-16 |
| LOC113230 | 0.830315 | 3.22E-16 |
| PKIG      | 0.45539  | 3.25E-16 |
| PDCD7     | -0.30521 | 3.25E-16 |
| RNF122    | 1.470247 | 3.25E-16 |
| ZKSCAN8   | -0.28881 | 3.26E-16 |
| SMPD3     | 1.482479 | 3.33E-16 |
| TIAM2     | 1.255918 | 3.40E-16 |

|           |          |          |
|-----------|----------|----------|
| ABCG4     | 2.57151  | 3.45E-16 |
| LINC00701 | 0.986273 | 3.45E-16 |
| CDC7      | 0.309982 | 3.46E-16 |
| PCSK7     | -0.29234 | 3.46E-16 |
| MED20     | -0.36699 | 3.46E-16 |
| RAP1GAP   | 0.715634 | 3.46E-16 |
| PSMG3-AS1 | 1.287115 | 3.50E-16 |
| CCDC88C   | 0.355997 | 3.53E-16 |
| SNX9      | -0.27366 | 3.68E-16 |
| MTO1      | -0.39019 | 3.80E-16 |
| DHCR7     | 0.319664 | 3.92E-16 |
| ZNF783    | 0.46801  | 3.96E-16 |
| 6-Mar     | -0.29102 | 3.99E-16 |
| DLX4      | 1.267025 | 4.05E-16 |
| CDV3      | -0.26441 | 4.07E-16 |
| NUP88     | -0.2775  | 4.14E-16 |
| METTL22   | -0.52877 | 4.17E-16 |
| HIST1H2BG | 1.07042  | 4.28E-16 |
| NFYA      | -0.38358 | 4.36E-16 |
| PAPSS2    | 2.156936 | 4.45E-16 |
| FBXL12    | -0.45231 | 4.50E-16 |
| ZNF689    | -0.42774 | 4.57E-16 |
| IP6K1     | -0.29014 | 4.69E-16 |
| IQSEC2    | 1.673786 | 4.78E-16 |
| SHOC2     | -0.31988 | 4.78E-16 |
| TGFB1I1   | 0.649542 | 4.78E-16 |
| PKIA      | 0.764774 | 4.80E-16 |
| TMEM203   | -0.64574 | 4.82E-16 |
| ZMYM3     | 0.281918 | 4.87E-16 |
| MGC12916  | 1.813955 | 4.88E-16 |
| RB1CC1    | -0.34123 | 4.94E-16 |
| HTATIP2   | 0.489777 | 4.99E-16 |
| CDC23     | -0.30587 | 4.99E-16 |
| C5orf30   | 0.644848 | 5.04E-16 |
| USF1      | -0.43832 | 5.36E-16 |
| PRSS16    | 0.613609 | 5.47E-16 |
| CCNF      | -0.43475 | 5.49E-16 |
| MYPOP     | 0.869561 | 5.54E-16 |
| GPRC5B    | 2.600124 | 5.54E-16 |
| DERL2     | -0.3782  | 5.57E-16 |
| QSOX2     | -0.28498 | 5.63E-16 |
| KLF3      | -0.35452 | 5.71E-16 |
| VAPA      | -0.26811 | 5.71E-16 |
| EPB41L4A  | 1.810759 | 5.89E-16 |
| FXR2      | -0.30431 | 5.89E-16 |
| UNC50     | -0.41405 | 5.92E-16 |
| BCAS4     | 0.516037 | 6.02E-16 |

|           |          |          |
|-----------|----------|----------|
| ZFH3      | 0.421859 | 6.12E-16 |
| HNRNPU    | -0.23109 | 6.20E-16 |
| PRRG4     | 2.238091 | 6.25E-16 |
| ZKSCAN5   | -0.36226 | 6.47E-16 |
| SPHK1     | 2.105798 | 6.57E-16 |
| EMC7      | -0.32767 | 6.58E-16 |
| ATP10D    | 0.667148 | 6.74E-16 |
| EMC8      | -0.35019 | 6.77E-16 |
| ZNF791    | -0.60387 | 6.82E-16 |
| FAM169A   | 0.340827 | 7.02E-16 |
| NXPH3     | 1.356467 | 7.04E-16 |
| ZNF385A   | 0.405073 | 7.38E-16 |
| NIPA2     | -0.33356 | 7.54E-16 |
| TNS1      | 2.065032 | 7.56E-16 |
| CTCF      | -0.24747 | 7.79E-16 |
| C15orf52  | 0.561089 | 7.88E-16 |
| ATG13     | -0.26914 | 7.95E-16 |
| MAP3K11   | -0.38332 | 8.25E-16 |
| NOL8      | -0.32695 | 8.27E-16 |
| FEM1B     | -0.31832 | 8.28E-16 |
| MED1      | -0.32455 | 8.28E-16 |
| INHBB     | -0.30004 | 8.31E-16 |
| RAI14     | 0.39008  | 8.42E-16 |
| DNAJC18   | 0.692524 | 8.53E-16 |
| H1FX      | 0.35354  | 8.56E-16 |
| MIER1     | -0.28318 | 8.56E-16 |
| GPC4      | 0.544125 | 8.77E-16 |
| COLCA2    | 2.584904 | 8.87E-16 |
| KIAA1244  | 0.552713 | 8.94E-16 |
| RASSF3    | 0.381563 | 9.16E-16 |
| MAK       | 1.41314  | 9.43E-16 |
| PDZD4     | 1.462782 | 9.48E-16 |
| FNBP1     | 0.593873 | 9.55E-16 |
| MAN1C1    | 2.446893 | 9.56E-16 |
| DAGLA     | 0.418239 | 1.03E-15 |
| WIZ       | -0.38398 | 1.06E-15 |
| TUBA1C    | -0.25904 | 1.06E-15 |
| ATF7IP2   | 0.637606 | 1.10E-15 |
| SUPT7L    | -0.33986 | 1.11E-15 |
| MED4      | -0.42849 | 1.12E-15 |
| SRCIN1    | 1.162526 | 1.15E-15 |
| MAPK1IP1L | -0.30306 | 1.15E-15 |
| METTL13   | -0.43066 | 1.17E-15 |
| MTMR14    | -0.35254 | 1.19E-15 |
| SUZ12     | -0.28454 | 1.20E-15 |
| MORF4L1   | -0.27103 | 1.20E-15 |
| RUNX1T1   | 1.368892 | 1.23E-15 |

|           |          |          |
|-----------|----------|----------|
| C2orf15   | 0.831101 | 1.25E-15 |
| KPNA6     | -0.31047 | 1.26E-15 |
| PEG10     | 0.301891 | 1.29E-15 |
| LINC00883 | 1.511062 | 1.32E-15 |
| GFM2      | -0.28818 | 1.33E-15 |
| LPHN2     | 0.938726 | 1.36E-15 |
| TSSC4     | -0.46484 | 1.37E-15 |
| BRD9      | -0.26449 | 1.44E-15 |
| HBS1L     | -0.28645 | 1.45E-15 |
| RNMTL1    | -0.38995 | 1.46E-15 |
| DUSP10    | 1.058647 | 1.48E-15 |
| PAPD4     | -0.33058 | 1.53E-15 |
| ZSCAN25   | -0.36638 | 1.54E-15 |
| ARL6IP1   | -0.27161 | 1.56E-15 |
| CUL3      | -0.33629 | 1.62E-15 |
| MOCS3     | -0.53359 | 1.62E-15 |
| PARP8     | 0.371661 | 1.63E-15 |
| RRP12     | -0.26488 | 1.64E-15 |
| EMC1      | -0.29206 | 1.65E-15 |
| SCG3      | 0.882204 | 1.70E-15 |
| FANCF     | 0.509073 | 1.79E-15 |
| TWISTNB   | -0.31099 | 1.80E-15 |
| NOL6      | -0.271   | 1.80E-15 |
| XBP1      | -0.36092 | 1.82E-15 |
| ZNF384    | -0.27339 | 1.92E-15 |
| COPB2     | -0.23775 | 1.93E-15 |
| LOC729732 | 0.833995 | 1.94E-15 |
| PLEK2     | 0.448963 | 1.94E-15 |
| ARF1      | -0.22415 | 1.96E-15 |
| CYTH3     | 0.350798 | 1.97E-15 |
| IRF2BPL   | 0.436338 | 1.97E-15 |
| DCTN4     | -0.3326  | 1.98E-15 |
| SLC35F2   | 0.305322 | 1.98E-15 |
| ZNF200    | -0.52889 | 2.03E-15 |
| EDARADD   | 1.10498  | 2.03E-15 |
| SENP5     | -0.3188  | 2.05E-15 |
| ATXN7L3B  | -0.34506 | 2.06E-15 |
| ZNF136    | -0.60564 | 2.06E-15 |
| MED13     | -0.27294 | 2.19E-15 |
| ADAM19    | 0.287577 | 2.23E-15 |
| GPR183    | -0.60051 | 2.24E-15 |
| GPRC5C    | -0.36301 | 2.27E-15 |
| FAM46B    | 0.913405 | 2.28E-15 |
| TET1      | 0.757719 | 2.30E-15 |
| IGSF5     | 1.621821 | 2.30E-15 |
| ZNF425    | 0.414975 | 2.34E-15 |
| ZNF212    | -0.41226 | 2.38E-15 |



|           |          |          |
|-----------|----------|----------|
| ACTB      | -0.19315 | 2.46E-15 |
| FERMT1    | 0.290698 | 2.50E-15 |
| KIAA0947  | -0.34814 | 2.50E-15 |
| WWC2-AS2  | 2.0369   | 2.52E-15 |
| USP35     | 0.909392 | 2.53E-15 |
| SLC41A1   | 0.374549 | 2.55E-15 |
| SMARCD3   | 1.217631 | 2.58E-15 |
| TRMT44    | -0.52574 | 2.62E-15 |
| SUPV3L1   | -0.39785 | 2.67E-15 |
| LINC00052 | 2.513875 | 2.70E-15 |
| PDLIM4    | 0.603548 | 2.70E-15 |
| AXL       | -0.25059 | 2.71E-15 |
| TTC25     | 0.818151 | 2.80E-15 |
| PAIP2     | -0.27946 | 2.82E-15 |
| SF3B3     | -0.22811 | 2.94E-15 |
| ATP6V0C   | -0.32087 | 2.98E-15 |
| CCNG2     | -0.86718 | 2.98E-15 |
| DDX47     | -0.25399 | 3.02E-15 |
| TOMM20    | -0.24915 | 3.13E-15 |
| SYNC      | 1.478529 | 3.15E-15 |
| ZFP36     | -0.48949 | 3.16E-15 |
| MYL12B    | -0.21012 | 3.18E-15 |
| ITPKA     | 0.67866  | 3.29E-15 |
| TNPO3     | -0.34005 | 3.30E-15 |
| ACSL4     | 0.390577 | 3.30E-15 |
| ZNF398    | -0.40472 | 3.46E-15 |
| PPP4C     | -0.32069 | 3.62E-15 |
| ASB7      | -0.47829 | 3.66E-15 |
| ANKRD40   | -0.37333 | 3.80E-15 |
| KHDRBS3   | 0.938492 | 3.90E-15 |
| RNF40     | -0.24516 | 3.95E-15 |
| B3GNT7    | 2.017853 | 3.98E-15 |
| MARS2     | -0.51118 | 4.01E-15 |
| POLM      | 0.432157 | 4.03E-15 |
| ZNF770    | -0.32364 | 4.07E-15 |
| KIAA1467  | 0.522579 | 4.08E-15 |
| RPS6KL1   | 0.494443 | 4.08E-15 |
| ZBED8     | 0.848651 | 4.08E-15 |
| ADSS      | -0.29581 | 4.12E-15 |
| PIGS      | -0.35573 | 4.14E-15 |
| KANK2     | 0.327238 | 4.14E-15 |
| MID1      | -0.25902 | 4.21E-15 |
| NOL9      | -0.38677 | 4.30E-15 |
| MRPS30    | -0.30305 | 4.31E-15 |
| PTBP1     | -0.19864 | 4.42E-15 |
| GAL3ST1   | 0.9407   | 4.62E-15 |
| LINC00941 | 0.830438 | 4.63E-15 |

|            |          |          |
|------------|----------|----------|
| TMEM43     | -0.35353 | 4.64E-15 |
| LOC1019273 | 0.452679 | 4.65E-15 |
| RBM12      | -0.32459 | 4.67E-15 |
| CEP95      | -0.3217  | 4.70E-15 |
| CYP2J2     | 0.757325 | 4.77E-15 |
| DNAJA3     | -0.26836 | 4.93E-15 |
| XDH        | 2.079233 | 4.95E-15 |
| TBC1D8     | -0.40275 | 5.01E-15 |
| MAP1LC3B   | -0.2873  | 5.08E-15 |
| MAPKAPK5   | -0.33193 | 5.18E-15 |
| ADC        | 1.131389 | 5.21E-15 |
| STRN3      | -0.35768 | 5.49E-15 |
| F2RL1      | 0.328313 | 5.51E-15 |
| PPP2CB     | -0.35651 | 5.53E-15 |
| DVL3       | -0.2675  | 5.55E-15 |
| RAC2       | 0.855505 | 5.60E-15 |
| GTPBP4     | -0.23127 | 5.60E-15 |
| KCNMB4     | 0.807697 | 5.72E-15 |
| SNX10      | 0.510471 | 5.87E-15 |
| DNAH6      | 1.588165 | 5.93E-15 |
| SLC30A3    | 0.74533  | 5.93E-15 |
| ACSS2      | 0.309407 | 6.03E-15 |
| SOCS1      | 1.422756 | 6.05E-15 |
| ZNF629     | -0.29258 | 6.11E-15 |
| CDCA5      | -0.27573 | 6.50E-15 |
| PLEKHG1    | 2.22458  | 6.50E-15 |
| NDEL1      | -0.27691 | 6.56E-15 |
| PSMC4      | -0.27025 | 6.62E-15 |
| JAG1       | 0.298669 | 6.76E-15 |
| FOXL2NB    | 0.866114 | 6.81E-15 |
| SRD5A3     | 0.605472 | 6.96E-15 |
| HTRA1      | 0.511769 | 6.96E-15 |
| PLEKHO1    | 0.648176 | 7.02E-15 |
| ATG16L1    | -0.33934 | 7.12E-15 |
| TFAM       | -0.28844 | 7.16E-15 |
| ZNF268     | -0.34567 | 7.39E-15 |
| NCBP1      | -0.24428 | 7.59E-15 |
| CDCA2      | -0.37161 | 7.62E-15 |
| RNF139     | -0.4499  | 7.84E-15 |
| TMEM164    | 0.38824  | 7.89E-15 |
| DMBT1      | 1.578088 | 7.89E-15 |
| KIAA2013   | -0.30708 | 7.89E-15 |
| SNHG17     | -0.28199 | 8.03E-15 |
| HIRA       | -0.32957 | 8.20E-15 |
| EMILIN2    | 0.788889 | 8.41E-15 |
| SIT1       | 0.78766  | 8.63E-15 |
| BCAS2      | -0.33074 | 9.03E-15 |

|          |          |          |
|----------|----------|----------|
| MICAL1   | 0.468554 | 9.14E-15 |
| LLGL2    | 0.253995 | 9.37E-15 |
| ATP6V0D1 | -0.22625 | 9.38E-15 |
| SRSF11   | -0.2545  | 9.40E-15 |
| ELP5     | -0.28734 | 9.43E-15 |
| MRPL32   | -0.40042 | 9.52E-15 |
| DDX19A   | -0.24906 | 9.57E-15 |
| SNAI2    | 0.381939 | 9.61E-15 |
| TAF4     | -0.37417 | 9.71E-15 |
| HMGCR    | -0.26576 | 9.84E-15 |
| PSMD11   | -0.24325 | 9.91E-15 |
| ZNF175   | -0.49689 | 9.92E-15 |
| CHIC2    | -0.59498 | 1.00E-14 |
| MT2A     | 0.290606 | 1.03E-14 |
| CELSR1   | 0.384478 | 1.04E-14 |
| OVOL2    | 1.979788 | 1.04E-14 |
| SCAF1    | -0.38726 | 1.05E-14 |
| ZNF746   | -0.3413  | 1.06E-14 |
| KIF26A   | 1.709286 | 1.06E-14 |
| TAOK1    | -0.35961 | 1.06E-14 |
| FAM53B   | 0.369339 | 1.07E-14 |
| GOLPH3L  | -0.41324 | 1.09E-14 |
| BAP1     | -0.32858 | 1.12E-14 |
| GOLT1B   | -0.34969 | 1.13E-14 |
| NES      | 0.260149 | 1.15E-14 |
| SLBP     | -0.25536 | 1.21E-14 |
| SF1      | -0.22924 | 1.23E-14 |
| PRDM1    | -0.56349 | 1.26E-14 |
| SART1    | -0.27004 | 1.29E-14 |
| TMEM55B  | -0.46332 | 1.31E-14 |
| TGIF2    | 0.445553 | 1.31E-14 |
| FARSA    | -0.26813 | 1.32E-14 |
| KCNJ11   | 1.234449 | 1.32E-14 |
| CAP2     | 0.550899 | 1.37E-14 |
| BFSP1    | 0.76659  | 1.38E-14 |
| SESTD1   | 0.446424 | 1.40E-14 |
| SRSF1    | -0.25742 | 1.43E-14 |
| RUSC2    | 0.447986 | 1.46E-14 |
| SLC45A1  | 2.125956 | 1.49E-14 |
| ITGB5    | -0.24284 | 1.50E-14 |
| SHC1     | -0.24279 | 1.66E-14 |
| XIAP     | -0.27696 | 1.70E-14 |
| EFR3A    | 0.341643 | 1.71E-14 |
| SUV420H1 | -0.27437 | 1.72E-14 |
| ZMYND11  | -0.28235 | 1.73E-14 |
| EIF2S2   | -0.22117 | 1.75E-14 |
| GRHL1    | 0.57626  | 1.77E-14 |

|            |          |          |
|------------|----------|----------|
| AASDHPPT   | -0.25694 | 1.82E-14 |
| AKAP13     | 0.385152 | 1.83E-14 |
| PLEKHG6    | 1.777112 | 1.83E-14 |
| CNKSR3     | 0.57094  | 1.85E-14 |
| SLC26A2    | 0.633223 | 1.86E-14 |
| TSG101     | -0.2638  | 1.88E-14 |
| ZNF7       | -0.53586 | 1.88E-14 |
| ATAD2B     | -0.28782 | 1.90E-14 |
| SGSH       | 0.668835 | 1.98E-14 |
| SSR4P1     | 1.443173 | 2.00E-14 |
| RLN2       | 1.700291 | 2.01E-14 |
| MTG2       | -0.28761 | 2.08E-14 |
| ZFP69      | 0.700344 | 2.11E-14 |
| CAD        | 0.269253 | 2.15E-14 |
| C16orf45   | 1.785804 | 2.16E-14 |
| TDRD7      | 0.499483 | 2.16E-14 |
| EML1       | 1.346731 | 2.17E-14 |
| IGFBP2     | 0.559124 | 2.18E-14 |
| TMC6       | 0.406803 | 2.22E-14 |
| SNRNP40    | -0.26804 | 2.24E-14 |
| ATP6V0E2   | 0.418924 | 2.28E-14 |
| C10orf54   | 0.443707 | 2.29E-14 |
| WNT3       | 0.90422  | 2.31E-14 |
| ZNHIT6     | -0.27249 | 2.33E-14 |
| CREBZF     | -0.26858 | 2.35E-14 |
| ADRB2      | 1.42736  | 2.37E-14 |
| PABPC1     | -0.21018 | 2.42E-14 |
| UBN1       | -0.29575 | 2.42E-14 |
| KRR1       | -0.26034 | 2.43E-14 |
| POLR3F     | -0.38338 | 2.52E-14 |
| SERINC1    | -0.28603 | 2.56E-14 |
| BCLAF1     | -0.26872 | 2.57E-14 |
| ICAM2      | 0.579224 | 2.58E-14 |
| ROCK2      | -0.30766 | 2.59E-14 |
| TM7SF3     | 0.258753 | 2.60E-14 |
| SLC25A23   | 0.534427 | 2.62E-14 |
| CNOT1      | -0.27732 | 2.63E-14 |
| SEC14L1    | -0.32165 | 2.64E-14 |
| UTP14C     | -0.4418  | 2.66E-14 |
| SDCBP2-AS1 | 0.81125  | 2.66E-14 |
| GPR137B    | 1.24271  | 2.69E-14 |
| CDC42EP2   | 0.529692 | 2.70E-14 |
| TFAP2E     | 1.012595 | 2.71E-14 |
| WNT6       | -0.63392 | 2.75E-14 |
| TRIM59     | 0.393619 | 2.91E-14 |
| ST6GALNAC6 | 0.838018 | 2.98E-14 |
| ACE        | 0.942298 | 2.98E-14 |

|          |          |          |
|----------|----------|----------|
| PNN      | -0.26983 | 3.12E-14 |
| OPA3     | -0.40345 | 3.21E-14 |
| GTF2IRD1 | 0.344741 | 3.40E-14 |
| SLC25A25 | -0.26205 | 3.40E-14 |
| LARP6    | 0.491158 | 3.44E-14 |
| MGEA5    | -0.24011 | 3.49E-14 |
| POLI     | 0.66595  | 3.52E-14 |
| TMEM171  | 2.026749 | 3.53E-14 |
| DHX30    | -0.24028 | 3.69E-14 |
| BSDC1    | -0.35101 | 3.71E-14 |
| C21orf91 | -0.38055 | 3.80E-14 |
| RAB21    | -0.3059  | 3.96E-14 |
| ASB1     | -0.41048 | 4.01E-14 |
| SLC37A1  | 0.649186 | 4.01E-14 |
| STX12    | -0.35515 | 4.17E-14 |
| ATXN7L3  | -0.31607 | 4.30E-14 |
| ACO2     | -0.24977 | 4.31E-14 |
| TNKS2    | -0.26297 | 4.43E-14 |
| RNF144B  | 1.201429 | 4.46E-14 |
| ZBTB17   | -0.41921 | 4.55E-14 |
| CMYA5    | 0.853657 | 4.59E-14 |
| AKNA     | 0.688082 | 4.63E-14 |
| NANOS1   | 1.285383 | 4.65E-14 |
| FGFR2    | 2.215814 | 4.80E-14 |
| RASGEF1A | 1.405764 | 4.86E-14 |
| CD47     | 0.408489 | 4.89E-14 |
| LIN52    | -0.47895 | 4.90E-14 |
| ADCY3    | 0.330043 | 5.01E-14 |
| COX10    | -0.39941 | 5.07E-14 |
| C8orf58  | -0.4616  | 5.12E-14 |
| KIAA0922 | 0.503083 | 5.27E-14 |
| RPUSD4   | -0.33782 | 5.35E-14 |
| SOCS7    | 0.425162 | 5.36E-14 |
| NHSL1    | 0.379497 | 5.36E-14 |
| KLHDC8B  | 1.015332 | 5.44E-14 |
| SETD2    | -0.34978 | 5.55E-14 |
| PCYOX1   | 0.344074 | 5.66E-14 |
| RPF2     | -0.29314 | 5.67E-14 |
| ABCF2    | -0.24941 | 5.73E-14 |
| C9orf114 | -0.3051  | 5.76E-14 |
| B3GNT1   | 0.552565 | 5.79E-14 |
| EAPP     | -0.36488 | 6.05E-14 |
| RBM14    | -0.25139 | 6.16E-14 |
| C17orf96 | 0.437197 | 6.38E-14 |
| WDR66    | 0.619434 | 6.41E-14 |
| PLK4     | -0.37104 | 6.59E-14 |
| APOBEC3F | 0.545144 | 6.69E-14 |

|           |          |          |
|-----------|----------|----------|
| PIK3C2B   | 0.527441 | 6.89E-14 |
| C12orf4   | -0.36047 | 6.96E-14 |
| PITPNM1   | 0.483488 | 7.09E-14 |
| RASGRF1   | 0.824646 | 7.15E-14 |
| EPDR1     | 0.263726 | 7.24E-14 |
| FTSJ3     | -0.25142 | 7.27E-14 |
| KIAA1429  | -0.30005 | 7.38E-14 |
| TSC1      | -0.45723 | 7.46E-14 |
| ARHGEF10L | 0.376501 | 7.57E-14 |
| PPM1G     | -0.23438 | 7.63E-14 |
| PADI1     | 0.684406 | 7.66E-14 |
| CCDC110   | 1.47658  | 7.66E-14 |
| ATXN2L    | -0.2372  | 7.78E-14 |
| BMP7      | 0.291542 | 7.80E-14 |
| CDK13     | -0.29679 | 8.24E-14 |
| TGM4      | 1.293987 | 8.29E-14 |
| CABYR     | 1.191073 | 8.38E-14 |
| UBP1      | -0.2526  | 8.55E-14 |
| CREG1     | 0.242463 | 8.56E-14 |
| PLEKHA1   | 0.362998 | 8.73E-14 |
| MAP1S     | -0.38061 | 8.94E-14 |
| PEX13     | -0.44635 | 9.41E-14 |
| ZNF805    | -0.70224 | 9.48E-14 |
| IFT57     | 0.395715 | 9.51E-14 |
| B4GALT6   | 1.294901 | 9.55E-14 |
| NMD3      | -0.25143 | 9.59E-14 |
| EDRF1     | -0.28808 | 9.62E-14 |
| STIM1     | 0.284585 | 9.71E-14 |
| ING1      | -0.2706  | 9.84E-14 |
| NHS       | 2.279998 | 9.89E-14 |
| PSMD6     | -0.26239 | 9.90E-14 |
| EML5      | 0.682079 | 9.95E-14 |
| KDM1B     | 0.326726 | 1.01E-13 |
| PLAA      | -0.27919 | 1.03E-13 |
| LRP5      | -0.25729 | 1.04E-13 |
| CNIH3     | 0.727931 | 1.05E-13 |
| POLDIP3   | -0.22287 | 1.10E-13 |
| CLTA      | -0.24566 | 1.12E-13 |
| IGF2BP3   | -0.31196 | 1.13E-13 |
| RP2       | -0.33009 | 1.17E-13 |
| CENPN     | -0.24691 | 1.17E-13 |
| SLC39A10  | 0.345481 | 1.23E-13 |
| TBK1      | -0.31783 | 1.24E-13 |
| ZNF18     | 0.456673 | 1.24E-13 |
| TRPV2     | 0.361649 | 1.25E-13 |
| C20orf194 | 0.468013 | 1.25E-13 |
| RNF41     | -0.28612 | 1.25E-13 |

|           |          |          |
|-----------|----------|----------|
| PTER      | 0.456426 | 1.28E-13 |
| MCRS1     | -0.27821 | 1.28E-13 |
| MPP2      | 0.700683 | 1.29E-13 |
| TPCN1     | 0.423874 | 1.30E-13 |
| CLPTM1L   | -0.24236 | 1.31E-13 |
| NUP50-AS1 | 0.712253 | 1.32E-13 |
| RHOD      | 0.311035 | 1.32E-13 |
| XK        | 2.065842 | 1.32E-13 |
| PHC3      | -0.28007 | 1.39E-13 |
| RRS1      | -0.3334  | 1.41E-13 |
| UBE2B     | -0.3483  | 1.41E-13 |
| HBEGF     | 0.342447 | 1.44E-13 |
| MT1M      | 0.801525 | 1.50E-13 |
| MTRR      | -0.26182 | 1.50E-13 |
| COPS3     | -0.26255 | 1.53E-13 |
| TMEM138   | -0.4409  | 1.59E-13 |
| TXNL1     | -0.32989 | 1.60E-13 |
| PTPN3     | 0.396653 | 1.60E-13 |
| ZNF644    | -0.27539 | 1.67E-13 |
| SLC35G1   | 0.599684 | 1.69E-13 |
| UBIAD1    | -0.41031 | 1.73E-13 |
| MBD6      | -0.35323 | 1.74E-13 |
| YARS2     | -0.28491 | 1.76E-13 |
| ZNF594    | 0.449931 | 1.81E-13 |
| MTMR9     | -0.43617 | 1.86E-13 |
| RNF157    | 0.375808 | 1.92E-13 |
| TTK       | -0.28989 | 1.92E-13 |
| ORAOV1    | -0.29974 | 1.92E-13 |
| BECN1     | -0.31002 | 1.93E-13 |
| LIN7C     | -0.34877 | 1.94E-13 |
| FUT8-AS1  | 1.440745 | 1.98E-13 |
| SEC61A1   | -0.2393  | 2.00E-13 |
| FAM212B   | 0.581689 | 2.01E-13 |
| SOWAHC    | 0.437917 | 2.03E-13 |
| DOLPP1    | -0.28051 | 2.07E-13 |
| USP7      | -0.26088 | 2.15E-13 |
| MAOA      | 1.404696 | 2.19E-13 |
| CACUL1    | -0.30792 | 2.21E-13 |
| FAM50B    | 1.252817 | 2.21E-13 |
| PIK3CA    | -0.4008  | 2.24E-13 |
| HECTD2    | 1.056645 | 2.29E-13 |
| FBXL16    | 0.569221 | 2.31E-13 |
| SUPT5H    | -0.22866 | 2.31E-13 |
| FOXD2-AS1 | 2.083351 | 2.33E-13 |
| ARHGAP25  | 0.607065 | 2.37E-13 |
| CCNO      | 0.946736 | 2.40E-13 |
| HAUS3     | -0.38073 | 2.42E-13 |

|         |          |          |
|---------|----------|----------|
| RGL1    | -0.28981 | 2.46E-13 |
| RNF168  | -0.41439 | 2.48E-13 |
| RAE1    | -0.2342  | 2.48E-13 |
| ALOX12B | 1.722064 | 2.49E-13 |
| TSPAN13 | 0.412496 | 2.54E-13 |
| NELFA   | -0.29851 | 2.60E-13 |
| SMG5    | -0.22647 | 2.61E-13 |
| PIP4K2C | -0.28508 | 2.62E-13 |
| ATL3    | 0.554802 | 2.66E-13 |
| BYSL    | -0.36191 | 2.68E-13 |
| WDR55   | -0.32131 | 2.71E-13 |
| GLDR    | 0.404887 | 2.79E-13 |
| DOCK11  | 0.518376 | 2.82E-13 |
| TBC1D13 | -0.39197 | 2.82E-13 |
| VIL1    | 0.231435 | 2.82E-13 |
| FIZ1    | -0.38456 | 2.91E-13 |
| ADD3    | 0.301274 | 2.92E-13 |
| ANKRD11 | -0.32404 | 3.25E-13 |
| CACNB1  | 0.571662 | 3.26E-13 |
| LANCL2  | -0.27493 | 3.28E-13 |
| TBC1D9  | 1.525251 | 3.32E-13 |
| SETD8   | -0.26455 | 3.49E-13 |
| ZNF786  | 0.387543 | 3.49E-13 |
| PMPCA   | -0.27304 | 3.51E-13 |
| RAB37   | 1.560622 | 3.55E-13 |
| RPL36AL | -0.26196 | 3.55E-13 |
| G3BP2   | -0.25327 | 3.56E-13 |
| LRRC34  | 0.784751 | 3.58E-13 |
| MLLT3   | 0.807795 | 3.58E-13 |
| CARKD   | -0.28297 | 3.59E-13 |
| TBC1D30 | 0.796218 | 3.59E-13 |
| DNAJA4  | 0.420913 | 3.66E-13 |
| EMC6    | -0.30857 | 3.71E-13 |
| TUFT1   | -0.29975 | 3.86E-13 |
| CYB561  | 0.368155 | 3.86E-13 |
| ZNF589  | 0.369601 | 3.91E-13 |
| B3GALT5 | 1.171903 | 3.91E-13 |
| DDX49   | -0.29532 | 4.02E-13 |
| SLC35D3 | 1.468134 | 4.02E-13 |
| GPR160  | 0.982528 | 4.07E-13 |
| NCS1    | 0.355636 | 4.12E-13 |
| ABCA5   | 0.538385 | 4.16E-13 |
| TRUB1   | -0.31049 | 4.16E-13 |
| SUPT4H1 | -0.26759 | 4.16E-13 |
| DIABLO  | -0.28577 | 4.23E-13 |
| CDK11B  | -0.39988 | 4.31E-13 |
| RAB3A   | 1.685595 | 4.36E-13 |



|           |          |          |
|-----------|----------|----------|
| MFSD5     | -0.51785 | 4.40E-13 |
| LOC642236 | 0.594147 | 4.46E-13 |
| LRRC8D    | 0.297716 | 4.51E-13 |
| DUSP7     | 0.393798 | 4.61E-13 |
| RBM27     | -0.25885 | 4.63E-13 |
| SYT13     | 0.736594 | 4.65E-13 |
| TAF1A     | -0.41223 | 4.74E-13 |
| TANK      | -0.37903 | 4.82E-13 |
| RSF1      | -0.27205 | 4.85E-13 |
| GDPD5     | 0.380777 | 4.99E-13 |
| SETDB1    | -0.32197 | 4.99E-13 |
| SKIDA1    | 1.684465 | 5.02E-13 |
| PLEKHH3   | 1.420069 | 5.08E-13 |
| DACT3     | 2.157573 | 5.18E-13 |
| BTG1      | -0.26194 | 5.29E-13 |
| RAVER1    | -0.29812 | 5.35E-13 |
| ZNF385C   | 1.213675 | 5.36E-13 |
| PSMD5     | -0.27834 | 5.46E-13 |
| UNC5A     | 1.589501 | 5.49E-13 |
| ASB6      | -0.3389  | 5.54E-13 |
| CA13      | 1.923296 | 5.64E-13 |
| CCNI2     | 2.131154 | 5.64E-13 |
| CENPL     | -0.5103  | 5.68E-13 |
| BSPRY     | 1.861079 | 5.79E-13 |
| IGF2BP2   | -0.23065 | 5.84E-13 |
| DENND5B   | 0.461309 | 5.97E-13 |
| ALCAM     | 0.818652 | 5.98E-13 |
| LRRC49    | 0.456803 | 5.99E-13 |
| NFE2L3    | 0.361969 | 6.07E-13 |
| COASY     | -0.27766 | 6.14E-13 |
| FMOD      | 0.977492 | 6.19E-13 |
| MT1E      | 0.307569 | 6.29E-13 |
| ATP13A1   | -0.27563 | 6.37E-13 |
| SNHG1     | -0.22151 | 6.58E-13 |
| CSRP1     | 0.239292 | 6.63E-13 |
| SLC41A2   | 0.590755 | 6.87E-13 |
| RALGPS2   | 0.604735 | 6.90E-13 |
| ZNF451    | -0.28757 | 7.00E-13 |
| OCEL1     | 0.711825 | 7.03E-13 |
| FAM174A   | -0.56783 | 7.04E-13 |
| MARK2     | -0.23217 | 7.10E-13 |
| SYNCRIP   | -0.23027 | 7.14E-13 |
| IGSF3     | 1.646452 | 7.23E-13 |
| EXPH5     | 0.519648 | 7.31E-13 |
| ECEL1     | 1.24845  | 7.31E-13 |
| NOP58     | -0.25098 | 7.40E-13 |
| YME1L1    | -0.24107 | 7.58E-13 |

|          |          |          |
|----------|----------|----------|
| DOC2B    | 1.780632 | 7.59E-13 |
| PITHD1   | -0.25785 | 7.80E-13 |
| NRGN     | 0.843016 | 7.83E-13 |
| FAM217B  | 0.504762 | 7.84E-13 |
| SBF2-AS1 | 0.740112 | 7.92E-13 |
| MAPK13   | 0.339555 | 8.06E-13 |
| GPR39    | 0.8498   | 8.17E-13 |
| RAPGEFL1 | 0.674164 | 8.42E-13 |
| POF1B    | 0.291417 | 8.48E-13 |
| KCTD15   | 0.566568 | 8.63E-13 |
| CEP350   | -0.28983 | 8.64E-13 |
| FOXL1    | 0.882093 | 8.64E-13 |
| PDIA3P1  | 0.972753 | 8.84E-13 |
| KDF1     | 1.232822 | 8.85E-13 |
| CHMP7    | -0.2801  | 8.87E-13 |
| SAR1B    | -0.34003 | 8.93E-13 |
| CACHD1   | 0.293559 | 9.17E-13 |
| AP3D1    | -0.22136 | 9.20E-13 |
| GRB10    | 1.015615 | 9.23E-13 |
| ZC3H18   | -0.22821 | 9.28E-13 |
| EFNA1    | -0.72854 | 9.36E-13 |
| NOTCH2NL | 0.635806 | 9.36E-13 |
| ISM1     | 1.019738 | 9.44E-13 |
| RAB20    | 0.346978 | 9.44E-13 |
| SLC31A2  | 0.807507 | 9.44E-13 |
| ACIN1    | -0.2024  | 9.52E-13 |
| MBD1     | -0.31233 | 9.56E-13 |
| LIPA     | 0.302996 | 9.56E-13 |
| POMGNT2  | 0.537536 | 9.56E-13 |
| ZNRD1    | -0.44106 | 9.72E-13 |
| FAM32A   | -0.25507 | 9.72E-13 |
| HNRNPL   | -0.20365 | 9.88E-13 |
| ARAP3    | 0.478267 | 1.01E-12 |
| SVIL     | -0.28475 | 1.01E-12 |
| HNRNPAB  | -0.23302 | 1.05E-12 |
| CPEB4    | -0.30631 | 1.07E-12 |
| TESC     | 0.341842 | 1.10E-12 |
| OXCT2    | 0.990164 | 1.10E-12 |
| RASL11A  | 1.431342 | 1.15E-12 |
| PITPNB   | -0.25258 | 1.16E-12 |
| LMTK3    | 1.738551 | 1.16E-12 |
| LAMA5    | 0.404436 | 1.16E-12 |
| ICT1     | -0.28912 | 1.18E-12 |
| TPRA1    | -0.43697 | 1.18E-12 |
| AP5M1    | -0.34728 | 1.22E-12 |
| STARD9   | 0.480459 | 1.23E-12 |
| TMX2     | -0.25223 | 1.25E-12 |

|           |          |          |
|-----------|----------|----------|
| RFK       | 0.362778 | 1.27E-12 |
| ELF4      | -0.25037 | 1.27E-12 |
| CIR1      | -0.34399 | 1.27E-12 |
| CHTOP     | -0.22353 | 1.27E-12 |
| PPFIA3    | 0.689586 | 1.33E-12 |
| ACTR1A    | -0.2437  | 1.35E-12 |
| TIMM44    | -0.27322 | 1.37E-12 |
| E2F4      | -0.26282 | 1.39E-12 |
| TLL4      | -0.28849 | 1.46E-12 |
| ZNF25     | 0.771778 | 1.50E-12 |
| MRPS18C   | -0.37584 | 1.52E-12 |
| COL4A3BP  | -0.33748 | 1.53E-12 |
| C2orf54   | 0.360362 | 1.54E-12 |
| CROCCP2   | -0.40593 | 1.58E-12 |
| HERC2     | 0.405641 | 1.58E-12 |
| TIAM1     | 0.486065 | 1.60E-12 |
| CPT1A     | 0.227807 | 1.64E-12 |
| TTC9      | 0.476171 | 1.65E-12 |
| DISP2     | 0.800987 | 1.66E-12 |
| IGF1R     | 0.274734 | 1.68E-12 |
| ZFAND2A   | -0.4345  | 1.70E-12 |
| PQBP1     | -0.26506 | 1.71E-12 |
| YIPF3     | -0.27498 | 1.73E-12 |
| SNX21     | 0.722103 | 1.73E-12 |
| CCDC59    | -0.26665 | 1.75E-12 |
| HNRNPLL   | -0.284   | 1.76E-12 |
| HIF1AN    | -0.27612 | 1.78E-12 |
| PGM5P2    | 0.664541 | 1.80E-12 |
| ABCE1     | -0.24575 | 1.82E-12 |
| LPIN2     | 0.379451 | 1.82E-12 |
| SHISA5    | 0.393595 | 1.90E-12 |
| STON1     | 1.748881 | 1.90E-12 |
| CLDN9     | 1.520204 | 1.91E-12 |
| TAF5L     | -0.29674 | 1.94E-12 |
| JPH1      | 0.477386 | 1.96E-12 |
| TSPYL4    | 0.346077 | 1.97E-12 |
| DCAF7     | -0.20851 | 1.97E-12 |
| SGCB      | 0.346356 | 1.97E-12 |
| SLC33A1   | -0.42452 | 1.98E-12 |
| DHDDS     | -0.32074 | 2.01E-12 |
| LINC01123 | 1.350578 | 2.14E-12 |
| FGF9      | 0.734534 | 2.17E-12 |
| PNO1      | -0.28125 | 2.23E-12 |
| SLC25A28  | -0.80304 | 2.25E-12 |
| PISD      | -0.32566 | 2.27E-12 |
| ZNF318    | 0.300916 | 2.29E-12 |
| NCBP2-AS2 | -0.39123 | 2.30E-12 |

|            |          |          |
|------------|----------|----------|
| DCLK2      | 1.84668  | 2.32E-12 |
| ATG14      | -0.54136 | 2.36E-12 |
| ERC2       | 2.100198 | 2.41E-12 |
| LLPH       | -0.28596 | 2.43E-12 |
| DUSP4      | -0.3197  | 2.46E-12 |
| KIAA1161   | 0.498026 | 2.48E-12 |
| PSMG2      | -0.29984 | 2.48E-12 |
| MED6       | -0.30039 | 2.48E-12 |
| SLC35B1    | -0.31791 | 2.50E-12 |
| TOR1AIP1   | -0.25141 | 2.50E-12 |
| GTF3C4     | -0.43887 | 2.51E-12 |
| MTM1       | -0.37551 | 2.54E-12 |
| LMO7       | -0.19663 | 2.60E-12 |
| PHACTR3    | 0.953771 | 2.61E-12 |
| C9orf40    | 0.426877 | 2.64E-12 |
| TMBIM6     | -0.20318 | 2.66E-12 |
| MAP3K15    | 0.549453 | 2.67E-12 |
| FADS1      | 0.244466 | 2.67E-12 |
| HMGXB4     | -0.29908 | 2.67E-12 |
| AFF1       | 0.263694 | 2.67E-12 |
| KISS1R     | 1.080076 | 2.68E-12 |
| CLPTM1     | -0.2613  | 2.73E-12 |
| MMP17      | 0.523674 | 2.80E-12 |
| CUL2       | -0.29087 | 2.81E-12 |
| ILKAP      | -0.32089 | 2.82E-12 |
| PELI3      | 0.94755  | 2.84E-12 |
| SECISBP2L  | -0.26425 | 2.85E-12 |
| ABCC9      | 0.472143 | 2.85E-12 |
| OASL       | 2.095248 | 2.87E-12 |
| ERVMER34-1 | 0.727485 | 2.96E-12 |
| PANK2      | -0.25484 | 2.98E-12 |
| UBE2W      | -0.32881 | 2.98E-12 |
| C11orf95   | 0.405784 | 3.02E-12 |
| PARP2      | -0.31915 | 3.04E-12 |
| KCTD2      | -0.34287 | 3.06E-12 |
| EPSTI1     | 1.110551 | 3.08E-12 |
| SLC12A7    | -0.21127 | 3.21E-12 |
| BZW1       | -0.21885 | 3.23E-12 |
| CREG2      | 1.870066 | 3.26E-12 |
| FBXL19     | 0.438751 | 3.27E-12 |
| KLHL15     | -0.41877 | 3.28E-12 |
| CCAR2      | -0.20517 | 3.30E-12 |
| COPS5      | -0.30017 | 3.36E-12 |
| C22orf46   | 0.33207  | 3.38E-12 |
| ERBB2      | 0.414353 | 3.38E-12 |
| TTC9C      | -0.3697  | 3.41E-12 |
| LSM1       | -0.33399 | 3.50E-12 |

|            |          |          |
|------------|----------|----------|
| CLASRP     | -0.23863 | 3.52E-12 |
| CRISPLD1   | 1.081183 | 3.56E-12 |
| PSMD12     | -0.29429 | 3.69E-12 |
| ZNF174     | 0.466849 | 3.70E-12 |
| C19orf44   | 0.435751 | 3.76E-12 |
| FAM115C    | 2.004958 | 3.78E-12 |
| SMIM6      | 0.509143 | 3.79E-12 |
| RAD21      | -0.21667 | 3.81E-12 |
| RIC8A      | -0.24576 | 3.88E-12 |
| EHHADH     | 0.41043  | 3.94E-12 |
| GPNMB      | 1.841084 | 3.95E-12 |
| BROX       | -0.30947 | 4.06E-12 |
| METAP2     | -0.20513 | 4.13E-12 |
| LAMP3      | 1.837438 | 4.14E-12 |
| SMCO4      | 1.02183  | 4.14E-12 |
| L3MBTL2    | -0.25528 | 4.16E-12 |
| NOP16      | -0.41064 | 4.17E-12 |
| ANO1       | 0.365434 | 4.18E-12 |
| IGFBP4     | 0.208192 | 4.21E-12 |
| GPN2       | -0.39034 | 4.28E-12 |
| ACOT11     | 0.845563 | 4.28E-12 |
| SIMC1      | 0.457619 | 4.38E-12 |
| ANGPTL2    | 1.062802 | 4.47E-12 |
| NAA30      | -0.32895 | 4.47E-12 |
| ZNF557     | -0.57401 | 4.52E-12 |
| TNRC18     | -0.27495 | 4.53E-12 |
| SERPINE2   | 0.328031 | 4.54E-12 |
| PROC       | 1.365323 | 4.62E-12 |
| SEL1L3     | 0.377171 | 4.90E-12 |
| C5orf22    | -0.27043 | 4.92E-12 |
| C17orf58   | 0.3329   | 4.97E-12 |
| TRIM10     | 0.824238 | 5.04E-12 |
| BSN        | 0.480034 | 5.11E-12 |
| CNBP       | -0.20602 | 5.11E-12 |
| PLEKHF1    | 1.35344  | 5.17E-12 |
| HMGB2      | -0.2191  | 5.22E-12 |
| ZNF274     | 0.287575 | 5.23E-12 |
| LOC1005061 | 1.082337 | 5.31E-12 |
| LINC00624  | 1.217587 | 5.35E-12 |
| CDKN1C     | 0.761381 | 5.40E-12 |
| RNF6       | -0.30975 | 5.44E-12 |
| PRPF40B    | 0.559766 | 5.47E-12 |
| DPP8       | -0.29562 | 5.48E-12 |
| LOC1001293 | -0.28862 | 5.49E-12 |
| FAM102A    | 0.448615 | 5.50E-12 |
| PLEC       | -0.23459 | 5.51E-12 |
| CERS4      | 0.561918 | 5.53E-12 |

|           |          |          |
|-----------|----------|----------|
| T         | 0.71634  | 5.66E-12 |
| GOLGA6C   | 1.097885 | 5.94E-12 |
| MIS12     | -0.24377 | 5.95E-12 |
| IKZF5     | -0.40721 | 5.95E-12 |
| MAP7D2    | 0.417583 | 5.96E-12 |
| PSMC6     | -0.31394 | 6.01E-12 |
| NRDE2     | -0.427   | 6.01E-12 |
| PRRC2A    | -0.22461 | 6.02E-12 |
| CCNA2     | -0.35793 | 6.07E-12 |
| FAM129B   | 0.245907 | 6.08E-12 |
| SPATA7    | 0.592076 | 6.09E-12 |
| RAVER2    | 0.336886 | 6.10E-12 |
| FAM179B   | 0.398591 | 6.17E-12 |
| ADIPOR1   | -0.24092 | 6.19E-12 |
| SMTNL2    | 1.894912 | 6.25E-12 |
| BRSK2     | 1.175476 | 6.29E-12 |
| LCOR      | -0.36185 | 6.34E-12 |
| PIK3R3    | 0.379289 | 6.43E-12 |
| RCHY1     | -0.33235 | 6.44E-12 |
| FAM104A   | -0.26068 | 6.46E-12 |
| POLDIP2   | -0.25354 | 6.46E-12 |
| DEPDC5    | 0.40552  | 6.56E-12 |
| FAM171B   | 1.409537 | 6.63E-12 |
| ATP11A    | 0.314837 | 6.68E-12 |
| DCP1A     | -0.27845 | 6.71E-12 |
| ATP1B1    | 0.284701 | 6.73E-12 |
| SENP6     | -0.23948 | 6.76E-12 |
| MAN1A1    | 0.393071 | 6.95E-12 |
| RINT1     | -0.29349 | 6.95E-12 |
| SORBS3    | 0.310695 | 7.08E-12 |
| FAM122B   | -0.21884 | 7.11E-12 |
| DPF1      | 0.443698 | 7.37E-12 |
| PRR3      | -0.28092 | 7.39E-12 |
| USP11     | -0.25054 | 7.39E-12 |
| HIST1H2BD | 0.381028 | 7.45E-12 |
| FAM107B   | 0.418017 | 7.45E-12 |
| HECTD1    | -0.33371 | 7.47E-12 |
| PLEKHG4B  | 0.294268 | 7.50E-12 |
| GATAD2B   | -0.35612 | 7.58E-12 |
| SCO1      | -0.28765 | 7.61E-12 |
| NSFL1C    | -0.21434 | 7.72E-12 |
| EIF6      | -0.19923 | 7.83E-12 |
| SH3BGRL2  | -0.25688 | 7.92E-12 |
| ATP1A3    | 1.180732 | 7.98E-12 |
| PPAP2A    | 0.477252 | 8.10E-12 |
| GNAO1     | 1.053436 | 8.23E-12 |
| GMPR      | 1.084554 | 8.25E-12 |

|           |          |          |
|-----------|----------|----------|
| CXorf40B  | -0.45947 | 8.31E-12 |
| ATAD5     | -0.32074 | 8.35E-12 |
| DOCK6     | 0.266793 | 8.35E-12 |
| C1QTNF2   | 1.745258 | 8.39E-12 |
| GPKOW     | -0.34667 | 8.39E-12 |
| TTC33     | -0.44461 | 8.66E-12 |
| UBE2K     | -0.22224 | 8.66E-12 |
| B3GAT1    | 0.693898 | 8.85E-12 |
| C11orf24  | -0.25157 | 8.98E-12 |
| CAPN7     | -0.26786 | 9.11E-12 |
| CYTH1     | 0.283273 | 9.12E-12 |
| PLIN3     | 0.256823 | 9.14E-12 |
| AMDHD1    | 0.948143 | 9.21E-12 |
| KRT40     | -0.2955  | 9.31E-12 |
| CD4       | 0.449143 | 9.33E-12 |
| SPRED1    | -0.26977 | 9.39E-12 |
| PDZD8     | -0.33542 | 9.49E-12 |
| MT1DP     | 2.05786  | 9.53E-12 |
| SLC46A3   | 0.914282 | 9.98E-12 |
| F2RL3     | 0.590233 | 1.02E-11 |
| SLC4A1AP  | -0.30755 | 1.03E-11 |
| ABCC3     | 0.44189  | 1.09E-11 |
| LINC01003 | 0.752252 | 1.09E-11 |
| SH3KBP1   | 0.290455 | 1.10E-11 |
| ISG20L2   | -0.27969 | 1.11E-11 |
| CYP27A1   | 0.696471 | 1.11E-11 |
| SHROOM2   | 0.44766  | 1.12E-11 |
| NDUFS3    | -0.29731 | 1.12E-11 |
| SH2B3     | 0.411928 | 1.12E-11 |
| ZNF772    | 1.078181 | 1.13E-11 |
| ARHGAP29  | -0.24156 | 1.13E-11 |
| NPLOC4    | -0.20683 | 1.13E-11 |
| GGACT     | 0.863084 | 1.15E-11 |
| PARP14    | 0.400576 | 1.16E-11 |
| IVNS1ABP  | -0.26822 | 1.19E-11 |
| NOP56     | -0.17405 | 1.20E-11 |
| IGDCC3    | 0.673816 | 1.23E-11 |
| IQCC      | -0.56232 | 1.25E-11 |
| MYO5B     | 0.324221 | 1.29E-11 |
| HBP1      | -0.74908 | 1.31E-11 |
| RIOK1     | -0.25519 | 1.32E-11 |
| ABHD13    | -0.32495 | 1.34E-11 |
| USP47     | -0.25689 | 1.36E-11 |
| TMEM45A   | 0.691734 | 1.37E-11 |
| SFXN5     | 0.473656 | 1.37E-11 |
| SLC25A43  | 0.440026 | 1.38E-11 |
| BLOC1S3   | -0.79033 | 1.42E-11 |

|          |          |          |
|----------|----------|----------|
| TMEM158  | 0.771248 | 1.42E-11 |
| SNX30    | 0.353739 | 1.43E-11 |
| TCF7     | 0.269305 | 1.44E-11 |
| FNDC5    | 1.802735 | 1.46E-11 |
| STXBP1   | 0.300006 | 1.47E-11 |
| EVPL     | 0.334116 | 1.49E-11 |
| PTGES    | 1.656067 | 1.51E-11 |
| PNRC1    | -0.5238  | 1.52E-11 |
| FAM179A  | 1.103841 | 1.52E-11 |
| AP3B2    | 0.899053 | 1.53E-11 |
| FKBP7    | 0.619034 | 1.56E-11 |
| SNX5     | -0.22602 | 1.57E-11 |
| CLK4     | -0.43978 | 1.57E-11 |
| RTFDC1   | -0.2207  | 1.57E-11 |
| ASH1L    | -0.39988 | 1.58E-11 |
| MX2      | 0.394889 | 1.58E-11 |
| PTPRJ    | 0.245819 | 1.58E-11 |
| DNAJB12  | -0.23711 | 1.59E-11 |
| DAZAP2   | -0.18631 | 1.61E-11 |
| ETV6     | 0.384051 | 1.68E-11 |
| ILDR2    | 0.33914  | 1.69E-11 |
| TRPM4    | 0.733004 | 1.70E-11 |
| SLC25A3  | -0.20724 | 1.70E-11 |
| UPF1     | -0.21575 | 1.72E-11 |
| PDK3     | 0.476745 | 1.72E-11 |
| LIPH     | 1.186269 | 1.75E-11 |
| NUP98    | -0.21865 | 1.79E-11 |
| PLEKHG4  | 0.363318 | 1.79E-11 |
| C6orf1   | 0.490966 | 1.79E-11 |
| NAPA     | -0.28233 | 1.79E-11 |
| MESDC2   | -0.29341 | 1.83E-11 |
| ZNF567   | -0.55048 | 1.88E-11 |
| MTF1     | -0.31857 | 1.92E-11 |
| PSMC2    | -0.24727 | 1.94E-11 |
| GNL2     | -0.24112 | 1.94E-11 |
| USPL1    | -0.48053 | 2.00E-11 |
| ZCCHC6   | -0.2776  | 2.04E-11 |
| EEF1A2   | 0.259775 | 2.07E-11 |
| ATP6V1C1 | -0.29643 | 2.16E-11 |
| KAT6A    | -0.27935 | 2.16E-11 |
| SRA1     | -0.27694 | 2.21E-11 |
| SERINC3  | -0.24336 | 2.24E-11 |
| NR1H2    | -0.35959 | 2.24E-11 |
| UACA     | 0.293898 | 2.25E-11 |
| HDAC11   | 0.545411 | 2.26E-11 |
| PPP1R2   | -0.25003 | 2.30E-11 |
| CDAN1    | -0.3256  | 2.31E-11 |



|         |          |          |
|---------|----------|----------|
| FAM57B  | 1.663606 | 2.31E-11 |
| UBE2J1  | -0.20192 | 2.31E-11 |
| HERPUD1 | -0.40738 | 2.33E-11 |
| OSBP2   | 0.455072 | 2.34E-11 |
| MAP7    | 0.312604 | 2.34E-11 |
| TEFM    | -0.58268 | 2.44E-11 |
| MRPS35  | -0.24552 | 2.45E-11 |
| SNX4    | -0.31125 | 2.46E-11 |
| FASTKD3 | -0.40692 | 2.46E-11 |
| ASXL1   | -0.22835 | 2.47E-11 |
| TAF11   | -0.31567 | 2.52E-11 |
| ARHGAP1 | -0.24153 | 2.58E-11 |
| SMARCD1 | -0.20565 | 2.59E-11 |
| ZC3H15  | -0.24062 | 2.63E-11 |
| TSPAN9  | 0.30903  | 2.64E-11 |
| ATP2B1  | 0.376475 | 2.65E-11 |
| SLC39A7 | -0.24593 | 2.68E-11 |
| IGDCC4  | 0.827075 | 2.72E-11 |
| LRR57   | -0.4097  | 2.75E-11 |
| HTRA3   | 1.319313 | 2.75E-11 |
| FAR2P2  | 0.912628 | 2.76E-11 |
| DYRK2   | 0.482219 | 2.78E-11 |
| DIS3    | -0.19364 | 2.89E-11 |
| LRR1    | -0.38998 | 2.89E-11 |
| VPS39   | -0.24113 | 2.90E-11 |
| USP19   | -0.25233 | 2.91E-11 |
| GMEB2   | -0.25714 | 2.93E-11 |
| HOXD11  | 2.160655 | 2.94E-11 |
| REEP6   | 0.593954 | 2.98E-11 |
| TRIM58  | 1.401252 | 3.00E-11 |
| TICRR   | -0.38653 | 3.00E-11 |
| OTUD6B  | -0.27451 | 3.00E-11 |
| DYNC2H1 | 0.481476 | 3.01E-11 |
| CCDC87  | 1.571944 | 3.02E-11 |
| PTPRE   | 0.277018 | 3.10E-11 |
| DTL     | -0.26579 | 3.14E-11 |
| CALHM2  | 0.919589 | 3.20E-11 |
| MT1F    | 0.516369 | 3.21E-11 |
| ZFYVE26 | -0.37918 | 3.23E-11 |
| SRP19   | -0.32082 | 3.25E-11 |
| CRCP    | -0.25992 | 3.30E-11 |
| ZNF639  | -0.38464 | 3.32E-11 |
| CAPN6   | 1.590418 | 3.33E-11 |
| COQ10A  | 0.548055 | 3.34E-11 |
| LIN9    | -0.33522 | 3.42E-11 |
| PRPF6   | -0.19622 | 3.42E-11 |
| TRAPPC4 | -0.30887 | 3.43E-11 |

|          |          |          |
|----------|----------|----------|
| EIF1     | -0.20261 | 3.44E-11 |
| PPM1H    | 0.419284 | 3.46E-11 |
| GPR19    | 1.556509 | 3.51E-11 |
| TRAPPC13 | -0.3004  | 3.52E-11 |
| TENC1    | 0.341924 | 3.54E-11 |
| NUP35    | -0.30037 | 3.56E-11 |
| ZNF862   | 0.462835 | 3.63E-11 |
| PHAX     | -0.28073 | 3.65E-11 |
| NDUFV3   | -0.31518 | 3.74E-11 |
| LZTFL1   | -0.36581 | 3.79E-11 |
| LIMK1    | 0.366401 | 3.83E-11 |
| RTN2     | 0.722242 | 3.87E-11 |
| KSR1     | 0.746608 | 3.88E-11 |
| ZBTB8A   | 0.542437 | 3.88E-11 |
| HELZ     | -0.33145 | 3.89E-11 |
| PGBD2    | 0.633475 | 3.94E-11 |
| TMED7    | -0.29837 | 3.98E-11 |
| GOLM1    | 0.250418 | 4.04E-11 |
| ENPP4    | 0.385499 | 4.11E-11 |
| TMEM165  | -0.29089 | 4.16E-11 |
| FLAD1    | -0.29152 | 4.22E-11 |
| XRN1     | -0.31378 | 4.29E-11 |
| PKP2     | 0.220942 | 4.34E-11 |
| WASF3    | 0.525136 | 4.37E-11 |
| KBTBD3   | 0.825019 | 4.38E-11 |
| SPNS3    | 0.482431 | 4.40E-11 |
| ZNF707   | -0.53541 | 4.51E-11 |
| CCDC117  | -0.42584 | 4.60E-11 |
| DLST     | -0.20116 | 4.63E-11 |
| DHX37    | -0.20932 | 4.68E-11 |
| PRKG2    | 0.488209 | 4.72E-11 |
| GOLGA5   | -0.31712 | 4.84E-11 |
| ANKEF1   | 0.386206 | 4.89E-11 |
| ENTPD8   | 0.476185 | 4.89E-11 |
| FOXP1    | 0.42206  | 4.89E-11 |
| RASL10B  | 0.497014 | 4.92E-11 |
| AQP3     | 0.353676 | 5.01E-11 |
| TRMT61B  | -0.4812  | 5.01E-11 |
| MALSU1   | -0.41253 | 5.02E-11 |
| BTF3L4   | -0.26545 | 5.11E-11 |
| RARS     | -0.21842 | 5.14E-11 |
| NCKAP5L  | -0.25728 | 5.16E-11 |
| SETDB2   | 0.311711 | 5.19E-11 |
| PITPNM3  | 0.576977 | 5.21E-11 |
| RNF31    | -0.34617 | 5.24E-11 |
| MYH9     | -0.18444 | 5.29E-11 |
| PCIF1    | -0.34032 | 5.29E-11 |

|           |          |          |
|-----------|----------|----------|
| PCDHAC2   | 1.825609 | 5.34E-11 |
| TM9SF2    | -0.20982 | 5.36E-11 |
| ACVR1     | 0.515031 | 5.39E-11 |
| ZBED6CL   | 0.368659 | 5.40E-11 |
| MF12      | 0.493468 | 5.53E-11 |
| CUL5      | -0.32642 | 5.64E-11 |
| CNOT7     | -0.21282 | 5.67E-11 |
| SORT1     | 0.260564 | 5.79E-11 |
| KIAA1551  | 0.302942 | 5.83E-11 |
| C4orf32   | 0.466292 | 5.95E-11 |
| GRAMD4    | 0.874051 | 6.05E-11 |
| RBM3      | -0.19052 | 6.06E-11 |
| TIMM10B   | -0.28357 | 6.13E-11 |
| SMIM13    | 0.464262 | 6.16E-11 |
| RELB      | -0.45565 | 6.18E-11 |
| STRN4     | -0.28034 | 6.25E-11 |
| DAG1      | 0.295073 | 6.26E-11 |
| PSCA      | 1.475243 | 6.30E-11 |
| KLHL9     | -0.33916 | 6.34E-11 |
| ADAMTS7   | 1.922081 | 6.44E-11 |
| DMXL2     | 0.368675 | 6.45E-11 |
| ZNRF1     | 0.336005 | 6.53E-11 |
| PAR6A     | 0.5421   | 6.65E-11 |
| DNAJC3    | -0.26821 | 6.87E-11 |
| LOC646903 | 1.889247 | 7.13E-11 |
| ERLEC1    | -0.33476 | 7.22E-11 |
| PEX16     | -0.31713 | 7.34E-11 |
| CYBRD1    | 0.919784 | 7.34E-11 |
| ABCB9     | 0.895678 | 7.40E-11 |
| PBX3      | 0.917246 | 7.41E-11 |
| RGS14     | 0.353501 | 7.44E-11 |
| SAMHD1    | 0.306963 | 7.47E-11 |
| CHMP1A    | -0.22414 | 7.52E-11 |
| SEL1L     | -0.26737 | 7.52E-11 |
| NREP      | 0.789241 | 7.61E-11 |
| TECPR2    | 0.369588 | 7.61E-11 |
| C6orf48   | -0.20983 | 7.63E-11 |
| GPX3      | 1.393704 | 7.92E-11 |
| MBD4      | -0.28046 | 7.95E-11 |
| UBQLN1    | -0.19105 | 7.98E-11 |
| HDAC7     | -0.3023  | 8.08E-11 |
| FBXO45    | -0.27481 | 8.19E-11 |
| HMGA2     | -0.45416 | 8.27E-11 |
| ARHGAP40  | 0.631549 | 8.27E-11 |
| SLC7A8    | 0.276595 | 8.28E-11 |
| ZBTB33    | -0.25278 | 8.32E-11 |
| ACVR1B    | 0.283178 | 8.48E-11 |

|           |          |          |
|-----------|----------|----------|
| PMS2CL    | -0.44934 | 8.57E-11 |
| KIF13A    | 0.323862 | 8.63E-11 |
| FGFBP3    | 0.92582  | 8.78E-11 |
| SUN2      | 0.2821   | 9.05E-11 |
| ITPRIPL2  | 0.473537 | 9.10E-11 |
| PITPNA    | -0.19105 | 9.27E-11 |
| SYTL4     | 0.879122 | 9.36E-11 |
| PES1      | -0.19927 | 9.36E-11 |
| STPG1     | 0.408712 | 9.62E-11 |
| NAB2      | 0.370191 | 9.69E-11 |
| TMEM206   | 0.417689 | 9.69E-11 |
| IKZF2     | 1.244749 | 9.71E-11 |
| RAB3B     | 1.317053 | 1.01E-10 |
| TMEM167B  | -0.34457 | 1.02E-10 |
| RASL11B   | 0.930278 | 1.02E-10 |
| CLTC      | -0.22496 | 1.03E-10 |
| SAMD13    | 1.648388 | 1.03E-10 |
| CNNM4     | 0.408909 | 1.04E-10 |
| CCDC43    | -0.30866 | 1.04E-10 |
| WDR36     | -0.23561 | 1.05E-10 |
| LOC642852 | 0.594343 | 1.05E-10 |
| WDR73     | -0.27517 | 1.05E-10 |
| NKRF      | -0.26325 | 1.06E-10 |
| SLCO2B1   | 1.943138 | 1.07E-10 |
| TOP3B     | -0.29055 | 1.08E-10 |
| TRIM45    | 0.927473 | 1.08E-10 |
| TM9SF4    | -0.22413 | 1.09E-10 |
| C17orf85  | -0.23606 | 1.09E-10 |
| CDK20     | 0.893173 | 1.12E-10 |
| NEURL4    | -0.3129  | 1.17E-10 |
| U2AF1     | -0.22152 | 1.18E-10 |
| C18orf21  | -0.50883 | 1.19E-10 |
| DNAJC6    | 0.224514 | 1.20E-10 |
| MGME1     | -0.27907 | 1.21E-10 |
| TBX20     | 1.01547  | 1.23E-10 |
| SS18L1    | -0.35307 | 1.23E-10 |
| E2F3      | -0.30637 | 1.27E-10 |
| GLTPD1    | -0.50906 | 1.30E-10 |
| CHD2      | -0.23996 | 1.32E-10 |
| HMHA1     | 0.396141 | 1.33E-10 |
| C1orf220  | 1.263275 | 1.34E-10 |
| SNCB      | 1.752937 | 1.34E-10 |
| TSPAN33   | 0.499683 | 1.38E-10 |
| P4HA2     | 0.584882 | 1.38E-10 |
| TYSND1    | 0.435861 | 1.38E-10 |
| POLE3     | -0.21217 | 1.41E-10 |
| LAMTOR3   | -0.45725 | 1.42E-10 |

|         |          |          |
|---------|----------|----------|
| MMGT1   | -0.28575 | 1.42E-10 |
| FNIP1   | -0.37473 | 1.42E-10 |
| WDR48   | -0.2797  | 1.42E-10 |
| TOPBP1  | -0.23033 | 1.44E-10 |
| PRSS22  | 1.213412 | 1.44E-10 |
| ZBTB5   | -0.41535 | 1.46E-10 |
| MR1     | 0.600746 | 1.46E-10 |
| DHX34   | -0.31908 | 1.46E-10 |
| POLR3D  | -0.31206 | 1.47E-10 |
| SHCBP1  | -0.26191 | 1.48E-10 |
| ZSWIM5  | 0.346295 | 1.49E-10 |
| SLC22A3 | 0.511927 | 1.49E-10 |
| KRT86   | 0.673317 | 1.50E-10 |
| SENP1   | -0.23325 | 1.52E-10 |
| C1orf50 | -0.4239  | 1.54E-10 |
| DNAJB9  | -1.4084  | 1.54E-10 |
| PDCD6   | -0.22938 | 1.54E-10 |
| FBXL2   | 0.554192 | 1.56E-10 |
| ABHD2   | -0.21843 | 1.58E-10 |
| ZNFX1   | -0.38863 | 1.60E-10 |
| PTAFR   | 1.049449 | 1.60E-10 |
| DUSP5   | -0.30139 | 1.61E-10 |
| TFRC    | -0.21811 | 1.61E-10 |
| PSD     | 1.670823 | 1.65E-10 |
| RLTPR   | 0.282465 | 1.66E-10 |
| CITED2  | -0.28507 | 1.68E-10 |
| PER2    | -0.42469 | 1.68E-10 |
| NAA25   | -0.2592  | 1.68E-10 |
| ABAT    | 0.87302  | 1.71E-10 |
| EMC3    | -0.32733 | 1.71E-10 |
| SLC1A7  | 1.56909  | 1.71E-10 |
| TTYH3   | 0.197068 | 1.72E-10 |
| MKL1    | -0.22685 | 1.72E-10 |
| BTBD1   | -0.2103  | 1.73E-10 |
| EPHA4   | 0.301044 | 1.73E-10 |
| TCERG1  | -0.22033 | 1.76E-10 |
| TAB2    | -0.19998 | 1.81E-10 |
| PRKD3   | 0.246725 | 1.83E-10 |
| PRKAB2  | -0.40228 | 1.86E-10 |
| RAB40C  | -0.4907  | 1.87E-10 |
| GSPT1   | -0.20192 | 1.91E-10 |
| ABCC2   | 0.361241 | 1.91E-10 |
| TAF13   | -0.50961 | 1.91E-10 |
| UBE2L3  | -0.19481 | 1.93E-10 |
| MED28   | -0.4238  | 1.93E-10 |
| SASS6   | -0.34759 | 1.97E-10 |
| ORAI2   | 0.286091 | 2.06E-10 |

|            |          |          |
|------------|----------|----------|
| DOCK9-AS2  | 1.542045 | 2.09E-10 |
| PPP1CC     | -0.18981 | 2.13E-10 |
| EPN2       | 0.352429 | 2.15E-10 |
| C22orf29   | 0.325234 | 2.16E-10 |
| LMAN2L     | -0.36823 | 2.16E-10 |
| OSBPL2     | -0.30454 | 2.20E-10 |
| KLLN       | 1.062108 | 2.23E-10 |
| CNOT2      | -0.22038 | 2.23E-10 |
| C3orf17    | -0.25918 | 2.23E-10 |
| LOC1019273 | 1.096488 | 2.30E-10 |
| ADCK2      | 0.535635 | 2.30E-10 |
| CTDNEP1    | -0.21508 | 2.30E-10 |
| CHST11     | 0.29884  | 2.32E-10 |
| FBXO3      | -0.36699 | 2.32E-10 |
| ZNF605     | 0.670039 | 2.36E-10 |
| SOCS4      | -0.26897 | 2.42E-10 |
| LGR5       | -0.28337 | 2.46E-10 |
| PCGF1      | -0.37853 | 2.48E-10 |
| PPP4R1     | -0.21293 | 2.48E-10 |
| SAPCD2     | 0.214171 | 2.50E-10 |
| SH2D2A     | 1.215916 | 2.53E-10 |
| TSFM       | -0.32508 | 2.53E-10 |
| PPTC7      | -0.36523 | 2.53E-10 |
| INPPL1     | 0.215292 | 2.53E-10 |
| FZD3       | 0.567282 | 2.57E-10 |
| ZNF598     | -0.29009 | 2.57E-10 |
| KCNH2      | 0.503093 | 2.61E-10 |
| MED10      | -0.23033 | 2.69E-10 |
| SRSF7      | -0.2255  | 2.70E-10 |
| EIF3B      | -0.18707 | 2.72E-10 |
| GOSR2      | -0.25885 | 2.73E-10 |
| TOR1A      | -0.27958 | 2.76E-10 |
| FBXO6      | 0.929782 | 2.79E-10 |
| CSDE1      | -0.20288 | 2.80E-10 |
| ACTR8      | -0.29079 | 2.81E-10 |
| TUT1       | -0.37108 | 2.82E-10 |
| C1orf198   | -0.25076 | 2.83E-10 |
| PDE3B      | 0.420456 | 2.86E-10 |
| EIF4G1     | -0.17561 | 2.86E-10 |
| BAG1       | -0.24381 | 2.88E-10 |
| KATNAL1    | 0.915065 | 2.92E-10 |
| STK11      | -0.437   | 2.94E-10 |
| HSPA9      | -0.17711 | 2.99E-10 |
| MREG       | 0.54122  | 3.02E-10 |
| IFT46      | 0.360357 | 3.07E-10 |
| ZDHHC2     | 0.439217 | 3.14E-10 |
| ARHGEF4    | 0.529809 | 3.15E-10 |

|           |          |          |
|-----------|----------|----------|
| R3HDM4    | -0.22697 | 3.15E-10 |
| NBEAL2    | 0.33218  | 3.15E-10 |
| TMEM64    | 0.625715 | 3.18E-10 |
| FBXO8     | -0.43618 | 3.18E-10 |
| BCR       | 0.294415 | 3.19E-10 |
| LDOC1L    | 0.229767 | 3.20E-10 |
| TRIM5     | 0.295774 | 3.22E-10 |
| ZNF501    | 0.579924 | 3.23E-10 |
| MTMR3     | -0.29152 | 3.23E-10 |
| ZNF32     | 0.447054 | 3.25E-10 |
| RNF223    | 1.717732 | 3.25E-10 |
| DYRK3     | 0.375129 | 3.26E-10 |
| ERMP1     | 0.328184 | 3.26E-10 |
| ITPKC     | -0.47425 | 3.27E-10 |
| HNRNPD    | -0.17521 | 3.28E-10 |
| BTBD7     | -0.47755 | 3.28E-10 |
| PCID2     | -0.20966 | 3.29E-10 |
| DDX21     | -0.20174 | 3.37E-10 |
| TMEM185B  | 0.312963 | 3.42E-10 |
| ZNF204P   | 1.280678 | 3.42E-10 |
| C7orf13   | 0.892217 | 3.45E-10 |
| XKRX      | 1.402615 | 3.46E-10 |
| ZNF254    | -0.32265 | 3.50E-10 |
| AFAP1L1   | 1.318119 | 3.51E-10 |
| LRCH1     | -0.28659 | 3.53E-10 |
| LINC00341 | 0.734605 | 3.55E-10 |
| FCF1      | -0.24972 | 3.59E-10 |
| CWF19L1   | -0.29522 | 3.60E-10 |
| UGDH      | -0.26289 | 3.66E-10 |
| GYG2      | 1.406973 | 3.69E-10 |
| LYPD6     | 1.277415 | 3.73E-10 |
| CCDC86    | -0.21275 | 3.74E-10 |
| CACNA1H   | 0.415087 | 3.78E-10 |
| ANKRD1    | 0.372299 | 3.79E-10 |
| ARCN1     | -0.19364 | 3.82E-10 |
| CROT      | 0.644356 | 3.91E-10 |
| AK7       | 1.148412 | 3.92E-10 |
| KIF2C     | -0.20678 | 3.99E-10 |
| NPTN      | -0.24598 | 4.09E-10 |
| ARHGEF2   | 0.266763 | 4.12E-10 |
| CIRH1A    | -0.18879 | 4.19E-10 |
| KIAA0232  | -0.35231 | 4.21E-10 |
| JUND      | 0.195617 | 4.22E-10 |
| SSH3      | 0.294429 | 4.27E-10 |
| RUFY3     | 0.396769 | 4.36E-10 |
| CGNL1     | 0.399493 | 4.36E-10 |
| FMO5      | 1.411255 | 4.36E-10 |

|            |          |          |
|------------|----------|----------|
| KCNK6      | 0.604306 | 4.39E-10 |
| STARD10    | 0.377294 | 4.49E-10 |
| MEGF9      | 0.479859 | 4.49E-10 |
| TBRG1      | -0.22222 | 4.50E-10 |
| DKK3       | 1.419201 | 4.53E-10 |
| MICAL2     | 0.492386 | 4.53E-10 |
| PDPK1      | -0.23276 | 4.54E-10 |
| GPATCH4    | -0.25266 | 4.55E-10 |
| SGSM1      | 0.960654 | 4.65E-10 |
| NR2F6      | 0.379438 | 4.66E-10 |
| PAXBP1     | -0.21586 | 4.72E-10 |
| MGA        | 0.342341 | 4.74E-10 |
| TMEM150C   | 1.358407 | 4.84E-10 |
| SCN1B      | 1.211646 | 4.84E-10 |
| TRPM6      | 1.62083  | 4.98E-10 |
| TMPRSS2    | 0.25695  | 5.11E-10 |
| SHANK2-AS1 | 1.80673  | 5.11E-10 |
| DNTTIP1    | -0.24683 | 5.12E-10 |
| CHKA       | -0.17834 | 5.17E-10 |
| DCTN6      | -0.26798 | 5.25E-10 |
| WIBG       | -0.25991 | 5.27E-10 |
| ADAT2      | -0.57501 | 5.32E-10 |
| ABHD8      | 0.77914  | 5.51E-10 |
| PRDM8      | 1.908649 | 5.57E-10 |
| RNH1       | -0.22893 | 5.63E-10 |
| ZNF483     | 1.624593 | 5.69E-10 |
| LOXL3      | 0.523657 | 5.83E-10 |
| SP2        | -0.26819 | 5.85E-10 |
| EDN1       | -0.25326 | 5.92E-10 |
| MECP2      | -0.23058 | 5.94E-10 |
| TRMT12     | -0.54023 | 5.98E-10 |
| RAB8A      | -0.23683 | 6.06E-10 |
| PWP2       | -0.28859 | 6.12E-10 |
| RIC8B      | 0.315358 | 6.25E-10 |
| REEP2      | 0.512917 | 6.30E-10 |
| TMEM38A    | 1.162057 | 6.33E-10 |
| JUN        | -0.18157 | 6.33E-10 |
| TTC30A     | 0.677379 | 6.33E-10 |
| NEK4       | -0.2866  | 6.34E-10 |
| RAB29      | 0.669136 | 6.36E-10 |
| PTTG1IP    | -0.165   | 6.42E-10 |
| CREB1      | -0.26253 | 6.53E-10 |
| PMAIP1     | -0.28502 | 6.54E-10 |
| SEC24B     | -0.26906 | 6.63E-10 |
| RAB23      | 0.379948 | 6.65E-10 |
| NEDD4L     | -0.23273 | 6.66E-10 |
| MTFR2      | -0.43736 | 6.66E-10 |



|           |          |          |
|-----------|----------|----------|
| PCDHB14   | 0.951278 | 6.68E-10 |
| HAUS2     | -0.21846 | 6.71E-10 |
| LRRC16B   | 1.187224 | 6.71E-10 |
| FOXO3B    | 0.731518 | 6.86E-10 |
| NCOA6     | -0.22674 | 6.87E-10 |
| RNF185    | -0.30324 | 6.87E-10 |
| LSM14A    | -0.21458 | 6.91E-10 |
| ENTPD7    | -0.34268 | 6.93E-10 |
| TMEM161B  | -0.34348 | 6.93E-10 |
| UTP11L    | -0.236   | 7.08E-10 |
| LRRC41    | -0.25245 | 7.18E-10 |
| ANKRD49   | -0.35494 | 7.28E-10 |
| CDC42     | -0.18675 | 7.30E-10 |
| PCYT2     | -0.2344  | 7.31E-10 |
| DNALI1    | 1.075485 | 7.41E-10 |
| CCNC      | -0.27686 | 7.47E-10 |
| CITED1    | 1.294211 | 7.68E-10 |
| SEC14L4   | 0.597342 | 7.71E-10 |
| KIAA1324  | 1.235713 | 7.72E-10 |
| ARPC4     | -0.22683 | 7.74E-10 |
| TIMM17A   | -0.23687 | 7.98E-10 |
| IGSF9B    | 0.96298  | 8.00E-10 |
| MID2      | 0.660367 | 8.06E-10 |
| CHORDC1   | -0.2057  | 8.07E-10 |
| NDUFV2    | -0.21615 | 8.08E-10 |
| SLC22A18  | 0.634353 | 8.14E-10 |
| FEM1C     | -0.35025 | 8.16E-10 |
| TNK2      | 0.28872  | 8.17E-10 |
| PXDN      | 1.168101 | 8.29E-10 |
| SF3A1     | -0.17543 | 8.31E-10 |
| GAB1      | 1.650843 | 8.36E-10 |
| ZC3H4     | -0.24191 | 8.38E-10 |
| TFB2M     | -0.39491 | 8.43E-10 |
| MUM1L1    | 0.303067 | 8.48E-10 |
| ARNT2     | 0.277378 | 8.79E-10 |
| PURB      | -0.36663 | 8.92E-10 |
| DCLRE1C   | -0.29203 | 9.10E-10 |
| TPRG1L    | -0.52077 | 9.26E-10 |
| LIG4      | 0.248144 | 9.27E-10 |
| CRLS1     | -0.27794 | 9.36E-10 |
| INCENP    | -0.27039 | 9.41E-10 |
| CTBP1-AS2 | 0.627421 | 9.42E-10 |
| GPSM2     | 0.376034 | 9.43E-10 |
| ENTHD2    | -0.36573 | 9.46E-10 |
| EYA3      | -0.26881 | 9.49E-10 |
| TIGD4     | 0.684809 | 9.52E-10 |
| EML6      | 1.195171 | 9.54E-10 |

|            |          |          |
|------------|----------|----------|
| BATF       | 0.489612 | 9.72E-10 |
| PLXNA1     | 0.265407 | 9.80E-10 |
| ODC1       | -0.18899 | 9.81E-10 |
| HDAC9      | -0.35675 | 9.91E-10 |
| MRTO4      | -0.21658 | 9.99E-10 |
| PCDH19     | 0.504237 | 1.01E-09 |
| METTLL16   | -0.23777 | 1.02E-09 |
| YIPF6      | -0.22339 | 1.02E-09 |
| USP43      | 0.327318 | 1.03E-09 |
| SMARCA1    | 0.295487 | 1.04E-09 |
| ABCC8      | 1.329288 | 1.04E-09 |
| TMEM25     | 0.565771 | 1.05E-09 |
| ASB13      | 0.361927 | 1.05E-09 |
| CNOT8      | -0.2715  | 1.05E-09 |
| UQCRFS1    | -0.23569 | 1.07E-09 |
| SRCAP      | -0.25921 | 1.07E-09 |
| PRKAB1     | -0.24475 | 1.08E-09 |
| ZNF823     | -0.46075 | 1.09E-09 |
| UNC13D     | 0.449934 | 1.09E-09 |
| WWC1       | 0.316526 | 1.09E-09 |
| MOB2       | -0.39311 | 1.09E-09 |
| DNAJC16    | -0.37767 | 1.09E-09 |
| GPR161     | 1.587745 | 1.10E-09 |
| ADORA2B    | 0.432217 | 1.12E-09 |
| ATN1       | -0.19276 | 1.12E-09 |
| JAZF1      | 0.951894 | 1.12E-09 |
| HIATL1     | -0.27439 | 1.14E-09 |
| LOC1019282 | 1.685318 | 1.14E-09 |
| NPC1       | -0.27663 | 1.15E-09 |
| NF2        | -0.28225 | 1.20E-09 |
| NAA35      | -0.29017 | 1.21E-09 |
| GLS        | -0.23362 | 1.21E-09 |
| CRHR1-IT1  | 0.955982 | 1.21E-09 |
| TAF2       | -0.21508 | 1.21E-09 |
| FYN        | -0.22224 | 1.22E-09 |
| LIMS1      | -0.23028 | 1.24E-09 |
| IL18       | 0.75326  | 1.24E-09 |
| PAK1       | 0.21829  | 1.26E-09 |
| ZC3H7A     | -0.24625 | 1.27E-09 |
| RAB5C      | -0.21296 | 1.30E-09 |
| LGR6       | 0.29088  | 1.32E-09 |
| EPB41L1    | 0.308151 | 1.37E-09 |
| DDX18      | -0.19514 | 1.37E-09 |
| TCTA       | 0.369928 | 1.37E-09 |
| MST1R      | 0.261965 | 1.38E-09 |
| AEN        | -0.27054 | 1.38E-09 |
| RBM17      | -0.2056  | 1.39E-09 |

|           |          |          |
|-----------|----------|----------|
| SLC23A2   | 0.298374 | 1.39E-09 |
| MANEAL    | 0.396219 | 1.41E-09 |
| DGCR2     | -0.24311 | 1.42E-09 |
| ZNF430    | -0.31955 | 1.44E-09 |
| FSD1L     | 0.398521 | 1.45E-09 |
| FASTK     | -0.30405 | 1.45E-09 |
| MAP3K2    | -0.25676 | 1.48E-09 |
| MICB      | 0.341493 | 1.48E-09 |
| DSE       | 0.996952 | 1.48E-09 |
| TMEM222   | -0.30545 | 1.49E-09 |
| C15orf38  | 0.337842 | 1.49E-09 |
| ANLN      | -0.21668 | 1.49E-09 |
| GTF3C2    | -0.21358 | 1.53E-09 |
| REPIN1    | -0.20196 | 1.53E-09 |
| EIF1B     | -0.26355 | 1.55E-09 |
| BUD31     | -0.21461 | 1.56E-09 |
| MCF2L-AS1 | 0.893    | 1.58E-09 |
| TEX10     | -0.30028 | 1.59E-09 |
| ZZZ3      | -0.24283 | 1.60E-09 |
| ZBTB6     | -0.44273 | 1.60E-09 |
| KCNQ4     | 0.950401 | 1.61E-09 |
| TMEM54    | 0.487988 | 1.64E-09 |
| ECE1      | 0.232943 | 1.67E-09 |
| UBE2N     | -0.18552 | 1.70E-09 |
| THNSL2    | 1.192245 | 1.71E-09 |
| DHCR24    | 0.247167 | 1.71E-09 |
| VAT1L     | 1.540135 | 1.71E-09 |
| FBLIM1    | 0.39319  | 1.73E-09 |
| CLRN3     | 0.562442 | 1.73E-09 |
| MERTK     | 0.372539 | 1.73E-09 |
| PRSS3     | 0.642933 | 1.73E-09 |
| KBTBD7    | 1.051808 | 1.74E-09 |
| EID2      | -0.3677  | 1.74E-09 |
| THSD4     | 0.404985 | 1.75E-09 |
| PDE9A     | 0.602533 | 1.78E-09 |
| YES1      | -0.27211 | 1.80E-09 |
| DYNLL1    | -0.23856 | 1.84E-09 |
| TYRO3     | 0.292133 | 1.84E-09 |
| ASXL2     | -0.32129 | 1.84E-09 |
| YEATS2    | 0.214535 | 1.85E-09 |
| PDCD11    | -0.22925 | 1.85E-09 |
| KIAA1191  | -0.25284 | 1.87E-09 |
| SPTB      | 1.06133  | 1.88E-09 |
| ABCA7     | 0.407667 | 1.90E-09 |
| DGKE      | 0.36573  | 1.90E-09 |
| C1R       | 0.594474 | 1.91E-09 |
| BTBD10    | -0.22305 | 1.91E-09 |

|           |          |          |
|-----------|----------|----------|
| ATP6V0A1  | 0.322948 | 1.93E-09 |
| MFAP2     | 0.307593 | 1.96E-09 |
| NECAP2    | -0.29958 | 1.97E-09 |
| DDX39A    | -0.22899 | 1.97E-09 |
| GOT1      | -0.23828 | 1.99E-09 |
| LYSMD4    | 0.616866 | 2.00E-09 |
| PAIP1     | -0.20293 | 2.01E-09 |
| TRIP10    | 0.343043 | 2.03E-09 |
| LINC01268 | 0.81452  | 2.03E-09 |
| KCTD10    | -0.31602 | 2.06E-09 |
| TERF2     | -0.18348 | 2.07E-09 |
| FAT1      | 0.324581 | 2.08E-09 |
| ZNF26     | -0.39913 | 2.12E-09 |
| GLYR1     | -0.21774 | 2.21E-09 |
| AQR       | -0.18949 | 2.22E-09 |
| BRD7      | -0.17464 | 2.23E-09 |
| KIF1C     | -0.21345 | 2.27E-09 |
| SPCS2     | -0.21956 | 2.28E-09 |
| ZNF16     | -0.45287 | 2.28E-09 |
| LTBP2     | 1.16945  | 2.30E-09 |
| KCTD9     | -0.25948 | 2.30E-09 |
| BTN2A2    | 0.406675 | 2.32E-09 |
| TBP       | -0.31439 | 2.36E-09 |
| MDK       | 0.286007 | 2.37E-09 |
| STRAP     | -0.17733 | 2.38E-09 |
| PATL1     | -0.20699 | 2.40E-09 |
| SRRT      | -0.18084 | 2.42E-09 |
| CPE       | 0.773852 | 2.42E-09 |
| PRDM15    | -0.35191 | 2.42E-09 |
| PRDM4     | -0.25299 | 2.43E-09 |
| LOC90246  | 1.623047 | 2.43E-09 |
| CTNNAL1   | -0.2159  | 2.46E-09 |
| TRIP12    | -0.21709 | 2.47E-09 |
| TRAPPC12  | -0.27211 | 2.47E-09 |
| SLC2A14   | 0.940092 | 2.47E-09 |
| ZFAND4    | 0.445008 | 2.48E-09 |
| ANAPC13   | -0.28021 | 2.52E-09 |
| CDC14B    | 0.330372 | 2.53E-09 |
| PPP4R2    | -0.33472 | 2.55E-09 |
| CSNK1G1   | -0.24518 | 2.57E-09 |
| WDR75     | -0.20781 | 2.59E-09 |
| BMS1      | -0.18969 | 2.61E-09 |
| RAPGEF2   | 0.281174 | 2.64E-09 |
| RSL1D1    | -0.19136 | 2.69E-09 |
| DPH1      | -0.30525 | 2.70E-09 |
| MYZAP     | 1.026711 | 2.72E-09 |
| TRIM27    | -0.21982 | 2.72E-09 |

|            |          |          |
|------------|----------|----------|
| SSX2IP     | 0.387826 | 2.77E-09 |
| SH3GL1     | -0.25002 | 2.83E-09 |
| SLC35A4    | -0.26315 | 2.84E-09 |
| DHX16      | -0.2045  | 2.86E-09 |
| SLC2A11    | 0.471369 | 2.88E-09 |
| MAGEB6     | 1.185488 | 2.90E-09 |
| KIAA1524   | -0.23154 | 2.95E-09 |
| GOLGA1     | -0.30123 | 2.97E-09 |
| LOXL1      | 0.549327 | 2.98E-09 |
| SEPHS2     | -0.24279 | 3.01E-09 |
| SERP1      | -0.23347 | 3.01E-09 |
| ARRB2      | 0.29866  | 3.01E-09 |
| ARRB1      | 0.455947 | 3.03E-09 |
| GPANK1     | -0.46029 | 3.06E-09 |
| ST3GAL1    | 1.890814 | 3.08E-09 |
| RIMKLB     | 0.977434 | 3.08E-09 |
| KPNA1      | -0.20945 | 3.09E-09 |
| AFG3L2     | -0.20491 | 3.09E-09 |
| WNT10A     | 0.556312 | 3.10E-09 |
| SMAD6      | 0.455501 | 3.11E-09 |
| EI24       | -0.21901 | 3.14E-09 |
| GGN        | 1.722256 | 3.17E-09 |
| BOK        | 1.155301 | 3.19E-09 |
| TMC8       | 0.441311 | 3.26E-09 |
| FAM175A    | 0.382549 | 3.30E-09 |
| TSPAN1     | 0.635432 | 3.34E-09 |
| EN2        | -0.36165 | 3.40E-09 |
| UBE3A      | -0.20532 | 3.42E-09 |
| LPP-AS2    | 0.870877 | 3.44E-09 |
| LOC1019269 | 0.951953 | 3.47E-09 |
| AHCTF1     | -0.23266 | 3.48E-09 |
| KLF2       | 0.319034 | 3.49E-09 |
| ATG4D      | -0.26608 | 3.49E-09 |
| ZBTB9      | -0.36242 | 3.52E-09 |
| ACOT13     | 0.422963 | 3.53E-09 |
| ESPN       | 0.660298 | 3.55E-09 |
| SMYD4      | 0.2968   | 3.57E-09 |
| NAPG       | -0.29117 | 3.58E-09 |
| MOB1A      | -0.39493 | 3.59E-09 |
| NAV1       | 0.325311 | 3.59E-09 |
| ALDH1A3    | 0.310332 | 3.65E-09 |
| ZFP64      | 0.326852 | 3.65E-09 |
| CHST13     | 0.870099 | 3.68E-09 |
| BMS1P4     | -0.3934  | 3.69E-09 |
| TANC1      | 0.303573 | 3.73E-09 |
| NUP62      | -0.26524 | 3.74E-09 |
| MORF4L2    | -0.18121 | 3.80E-09 |

|           |          |          |
|-----------|----------|----------|
| LAPTM4B   | 0.223884 | 3.82E-09 |
| FMNL3     | 0.35557  | 3.84E-09 |
| PSEN1     | -0.25603 | 3.89E-09 |
| CBY1      | -0.40831 | 3.91E-09 |
| HNRNPK    | -0.15595 | 3.92E-09 |
| TSHZ1     | 0.858579 | 3.93E-09 |
| CHUK      | -0.22766 | 3.93E-09 |
| PEX11B    | -0.40044 | 3.94E-09 |
| CABP4     | 0.504225 | 3.96E-09 |
| SMPD1     | -0.39782 | 4.01E-09 |
| DCP2      | -0.31545 | 4.02E-09 |
| SLC35E1   | -0.26245 | 4.04E-09 |
| TRAF6     | -0.24762 | 4.09E-09 |
| DNAJB5    | 0.701333 | 4.11E-09 |
| SGTB      | 0.307493 | 4.12E-09 |
| PTCD3     | -0.20172 | 4.25E-09 |
| RAB31     | 1.081792 | 4.29E-09 |
| ZNF700    | -0.34921 | 4.30E-09 |
| ZSCAN12P1 | 0.751107 | 4.36E-09 |
| DDX58     | 0.473382 | 4.39E-09 |
| ALAD      | 0.25574  | 4.51E-09 |
| DIEXF     | -0.26157 | 4.51E-09 |
| COL9A3    | 0.373877 | 4.55E-09 |
| PLXNA2    | 0.672169 | 4.60E-09 |
| NDUFAF5   | -0.26472 | 4.61E-09 |
| PRPF40A   | -0.18199 | 4.61E-09 |
| PAOX      | 0.827071 | 4.70E-09 |
| SAMD9     | 0.476954 | 4.70E-09 |
| DNAJB6    | -0.20855 | 4.71E-09 |
| SUCO      | -0.28438 | 4.72E-09 |
| FAM168B   | -0.18486 | 4.74E-09 |
| CD2BP2    | -0.22808 | 4.78E-09 |
| SSSCA1    | -0.3684  | 4.99E-09 |
| TMEM144   | 0.595794 | 5.00E-09 |
| RAC1      | -0.17915 | 5.08E-09 |
| ABCG1     | 0.65518  | 5.10E-09 |
| SDHD      | -0.21231 | 5.16E-09 |
| IFIT1     | 1.410294 | 5.20E-09 |
| GRK5      | 0.434788 | 5.21E-09 |
| IPO7      | -0.19941 | 5.21E-09 |
| MPP7      | 0.363488 | 5.21E-09 |
| RNF115    | -0.27417 | 5.26E-09 |
| PPP2R3A   | 0.798152 | 5.29E-09 |
| DNAJB14   | -0.37229 | 5.29E-09 |
| POFUT2    | -0.42495 | 5.32E-09 |
| CSRNP1    | -0.24531 | 5.34E-09 |
| RNPS1     | -0.17408 | 5.34E-09 |

|           |          |          |
|-----------|----------|----------|
| SEC23B    | -0.20029 | 5.37E-09 |
| PYGB      | 0.177738 | 5.37E-09 |
| LINC00673 | -0.18668 | 5.43E-09 |
| SREK1IP1  | -0.26519 | 5.43E-09 |
| CHMP4B    | -0.22267 | 5.44E-09 |
| SMCR8     | -0.32818 | 5.52E-09 |
| NIPBL     | -0.25567 | 5.53E-09 |
| TAPT1     | -0.27033 | 5.56E-09 |
| DRG1      | -0.26583 | 5.59E-09 |
| GEMIN7    | -0.4691  | 5.66E-09 |
| FAM227A   | 0.724068 | 5.74E-09 |
| RTF1      | -0.2353  | 5.77E-09 |
| STMN3     | 0.390876 | 5.78E-09 |
| WDR1      | -0.15897 | 5.92E-09 |
| BLOC1S2   | -0.2797  | 5.92E-09 |
| MATN3     | 0.785088 | 5.96E-09 |
| PRPF38A   | -0.19031 | 6.04E-09 |
| MAP3K3    | -0.25297 | 6.07E-09 |
| CLDN1     | -0.1864  | 6.10E-09 |
| F3        | 0.512201 | 6.12E-09 |
| OBSCN     | 0.786959 | 6.13E-09 |
| EIF5B     | -0.19548 | 6.14E-09 |
| CXADR     | 0.322553 | 6.27E-09 |
| MDGA1     | 0.672743 | 6.27E-09 |
| C1orf109  | -0.31845 | 6.32E-09 |
| CSRP2     | 0.265706 | 6.36E-09 |
| INO80     | -0.22439 | 6.40E-09 |
| PROS1     | 0.401449 | 6.40E-09 |
| RANBP3    | -0.19892 | 6.55E-09 |
| ADA       | 0.278512 | 6.59E-09 |
| IK        | -0.18462 | 6.64E-09 |
| ARMC9     | 0.353272 | 6.71E-09 |
| SPPL3     | -0.34135 | 6.75E-09 |
| NUPL2     | -0.29773 | 6.76E-09 |
| CAMKK1    | 0.455324 | 6.76E-09 |
| PSKH1     | -0.23441 | 6.83E-09 |
| GJB1      | 0.244898 | 6.87E-09 |
| CNTNAP3B  | 1.193946 | 6.88E-09 |
| ZNF883    | 0.964981 | 6.95E-09 |
| SLC4A7    | -0.18594 | 6.97E-09 |
| PRPF39    | -0.24461 | 7.16E-09 |
| EIF2B5    | -0.20442 | 7.17E-09 |
| TRIM4     | -0.25282 | 7.21E-09 |
| RHOBTB3   | 0.288135 | 7.23E-09 |
| MFSD6     | 0.299519 | 7.28E-09 |
| NFE2L1    | -0.2039  | 7.43E-09 |
| RAB32     | 0.459138 | 7.45E-09 |

|           |          |          |
|-----------|----------|----------|
| ARNTL     | 0.351628 | 7.45E-09 |
| EGFR      | 1.28833  | 7.47E-09 |
| NOSIP     | -0.2579  | 7.51E-09 |
| MYNN      | -0.33178 | 7.53E-09 |
| LOC440173 | 0.997094 | 7.56E-09 |
| YAF2      | -0.27734 | 7.58E-09 |
| PUF60     | -0.17617 | 7.65E-09 |
| RAD51AP1  | -0.23016 | 7.70E-09 |
| KIAA2026  | -0.47518 | 7.71E-09 |
| TPD52L1   | 0.315915 | 7.73E-09 |
| TMC7      | 0.291433 | 7.89E-09 |
| CDC40     | -0.26555 | 7.92E-09 |
| SV2A      | 0.450216 | 7.92E-09 |
| TMED2     | -0.19006 | 7.95E-09 |
| ZSWIM1    | -0.38097 | 8.05E-09 |
| CNOT11    | -0.2117  | 8.19E-09 |
| MMD       | 0.588809 | 8.20E-09 |
| GON4L     | -0.20317 | 8.24E-09 |
| SLC48A1   | 0.408454 | 8.25E-09 |
| ANKRD13D  | 0.30375  | 8.25E-09 |
| NOD1      | 0.527762 | 8.26E-09 |
| ADNP2     | -0.33258 | 8.27E-09 |
| AKAP11    | 0.314917 | 8.35E-09 |
| GOLGA2    | -0.21756 | 8.35E-09 |
| RTKN2     | 0.322555 | 8.48E-09 |
| UBE3C     | -0.21574 | 8.55E-09 |
| SETD7     | 0.434098 | 8.55E-09 |
| ARHGEF16  | 0.41069  | 8.64E-09 |
| TIGD7     | 0.737604 | 8.69E-09 |
| SOX13     | 0.206554 | 8.85E-09 |
| RBM42     | -0.26306 | 8.86E-09 |
| EREG      | 0.295434 | 8.98E-09 |
| ARAF      | -0.23829 | 9.01E-09 |
| ACP6      | 0.283646 | 9.03E-09 |
| MRPL15    | -0.2876  | 9.16E-09 |
| MYEF2     | 0.254384 | 9.27E-09 |
| ZEB1-AS1  | 0.624073 | 9.35E-09 |
| CNN3      | -0.18258 | 9.36E-09 |
| NEDD4     | 0.250515 | 9.38E-09 |
| CAPZA1    | -0.17678 | 9.38E-09 |
| GTSE1     | -0.22778 | 9.56E-09 |
| SMIM7     | -0.23818 | 9.61E-09 |
| POLR2E    | -0.18923 | 9.92E-09 |
| TMEM30A   | -0.23806 | 9.92E-09 |
| COL9A2    | 1.05449  | 9.95E-09 |
| BAZ1B     | -0.16854 | 1.01E-08 |
| TP53      | -0.20457 | 1.01E-08 |



|           |          |          |
|-----------|----------|----------|
| DROSHA    | -0.21622 | 1.02E-08 |
| ZBED4     | -0.26755 | 1.02E-08 |
| PKIB      | 1.392483 | 1.03E-08 |
| CHTF8     | -0.1702  | 1.04E-08 |
| MGAT1     | -0.28922 | 1.04E-08 |
| TUBB3     | 0.220137 | 1.05E-08 |
| ASUN      | -0.16734 | 1.07E-08 |
| UPP1      | 0.240311 | 1.08E-08 |
| AGA       | 0.382101 | 1.08E-08 |
| ABHD14B   | 0.236243 | 1.08E-08 |
| PIK3AP1   | 0.68964  | 1.08E-08 |
| EIF4B     | -0.16112 | 1.10E-08 |
| ITGB1     | -0.19689 | 1.11E-08 |
| RNF39     | 0.625425 | 1.11E-08 |
| DDX5      | -0.19425 | 1.12E-08 |
| SH3PXD2A  | 0.418544 | 1.13E-08 |
| PRPF4B    | -0.19658 | 1.13E-08 |
| ARHGAP10  | 0.389741 | 1.14E-08 |
| LOC493754 | -0.30169 | 1.15E-08 |
| TBX4      | 0.85511  | 1.15E-08 |
| XPO1      | -0.16026 | 1.15E-08 |
| RAB11FIP3 | 0.313543 | 1.18E-08 |
| PCSK6     | 0.428608 | 1.19E-08 |
| SCRN1     | -0.16946 | 1.19E-08 |
| PSMC3     | -0.1838  | 1.19E-08 |
| C5orf24   | -0.23625 | 1.19E-08 |
| TPRN      | -0.45874 | 1.21E-08 |
| ATP2B4    | 0.791204 | 1.22E-08 |
| RPGRIP1L  | 0.374844 | 1.27E-08 |
| C9orf72   | 0.770805 | 1.27E-08 |
| ALDH6A1   | -0.30736 | 1.27E-08 |
| SOX12     | 0.347534 | 1.31E-08 |
| HTATSF1P2 | 0.462137 | 1.33E-08 |
| BTAF1     | -0.23576 | 1.33E-08 |
| SLC39A8   | 0.532801 | 1.34E-08 |
| CTNNBIP1  | 0.219987 | 1.35E-08 |
| C17orf53  | -0.39245 | 1.37E-08 |
| SPTLC1    | -0.19781 | 1.37E-08 |
| SYNGAP1   | 0.508894 | 1.40E-08 |
| ARID2     | -0.24913 | 1.41E-08 |
| RARB      | 1.071752 | 1.41E-08 |
| LINC01116 | 0.87455  | 1.42E-08 |
| NEK2      | -0.23442 | 1.44E-08 |
| RAPGEF6   | -0.23911 | 1.45E-08 |
| LEF1      | 0.551507 | 1.47E-08 |
| C12orf43  | -0.29358 | 1.47E-08 |
| TNFAIP8L1 | 0.512528 | 1.48E-08 |

|            |          |          |
|------------|----------|----------|
| NAPEPLD    | 0.407682 | 1.48E-08 |
| HOXA7      | -0.31128 | 1.50E-08 |
| CCDC151    | 1.252303 | 1.50E-08 |
| SYNRG      | -0.23457 | 1.50E-08 |
| SLC22A5    | 0.399661 | 1.51E-08 |
| LRR37A11P  | 1.552387 | 1.52E-08 |
| EIF4A3     | -0.18323 | 1.53E-08 |
| LCA5       | 0.399438 | 1.53E-08 |
| RRP15      | -0.25144 | 1.54E-08 |
| MMP11      | 1.260498 | 1.56E-08 |
| SRFBP1     | -0.315   | 1.56E-08 |
| ARMC1      | -0.22609 | 1.56E-08 |
| RNF138     | -0.29154 | 1.57E-08 |
| MORC2      | 0.316097 | 1.58E-08 |
| FLCN       | -0.48986 | 1.62E-08 |
| HAUS6      | -0.2278  | 1.63E-08 |
| STAT5A     | 0.712579 | 1.63E-08 |
| CUEDC1     | 0.240089 | 1.65E-08 |
| ZC3H11A    | -0.18874 | 1.66E-08 |
| ALDH1A2    | 0.199648 | 1.66E-08 |
| SSU72      | -0.24884 | 1.69E-08 |
| ZBTB42     | 1.179998 | 1.70E-08 |
| DNMT3A     | 0.306558 | 1.70E-08 |
| TRIB3      | 0.30618  | 1.70E-08 |
| UBXN7      | -0.27077 | 1.74E-08 |
| FASLG      | -0.59356 | 1.78E-08 |
| ALDH1L2    | 1.172121 | 1.80E-08 |
| LOC1019268 | 0.805303 | 1.81E-08 |
| C12orf36   | 0.405049 | 1.82E-08 |
| GOLGA3     | -0.29235 | 1.83E-08 |
| SNHG15     | -0.25324 | 1.86E-08 |
| SOS1       | -0.24089 | 1.88E-08 |
| FAM189A2   | 1.605156 | 1.89E-08 |
| TBX6       | 1.205611 | 1.89E-08 |
| AP4E1      | -0.25114 | 1.90E-08 |
| RHOF       | 0.284539 | 1.90E-08 |
| TMBIM1     | 0.340878 | 1.91E-08 |
| SH3BP1     | 0.28403  | 1.93E-08 |
| HIST3H2BB  | 1.02605  | 1.95E-08 |
| NHP2L1     | -0.17588 | 2.00E-08 |
| PIK3R4     | -0.2496  | 2.01E-08 |
| LRR59      | -0.18852 | 2.03E-08 |
| SARNP      | -0.22109 | 2.06E-08 |
| HIST1H2AC  | 0.294775 | 2.08E-08 |
| C3orf52    | 0.540287 | 2.08E-08 |
| SATB1      | 0.538765 | 2.09E-08 |
| KIFC1      | -0.27026 | 2.10E-08 |

|            |          |          |
|------------|----------|----------|
| GOLGA2P7   | 0.359788 | 2.11E-08 |
| NOA1       | -0.24628 | 2.13E-08 |
| FSTL4      | 0.402414 | 2.14E-08 |
| RELT       | -0.25851 | 2.15E-08 |
| ZDHHC3     | -0.20127 | 2.15E-08 |
| DYRK1B     | -0.33281 | 2.16E-08 |
| ASRGL1     | 0.445254 | 2.17E-08 |
| UBXN1      | -0.19417 | 2.18E-08 |
| MRPS12     | -0.26063 | 2.21E-08 |
| LONP2      | -0.21322 | 2.21E-08 |
| FASTKD2    | -0.22297 | 2.22E-08 |
| RHOG       | -0.27023 | 2.26E-08 |
| RAB11FIP4  | 0.393793 | 2.26E-08 |
| EIF4H      | -0.15515 | 2.28E-08 |
| PPARA      | 1.038542 | 2.30E-08 |
| THRAP3     | -0.16498 | 2.30E-08 |
| WHAMMP2    | 0.696406 | 2.30E-08 |
| ELOF1      | -0.23696 | 2.31E-08 |
| SMU1       | -0.2222  | 2.31E-08 |
| FAM207A    | -0.29879 | 2.31E-08 |
| SH2D5      | 1.433271 | 2.31E-08 |
| AUP1       | -0.20102 | 2.31E-08 |
| OTUD6B-AS1 | -0.26867 | 2.33E-08 |
| VPS4B      | -0.3352  | 2.33E-08 |
| MRPS7      | -0.20835 | 2.35E-08 |
| ASAP2      | -0.23524 | 2.37E-08 |
| TNPO2      | -0.20752 | 2.42E-08 |
| NFKBIA     | -0.28953 | 2.45E-08 |
| TMEM159    | 1.667288 | 2.47E-08 |
| ZNF131     | -0.23715 | 2.50E-08 |
| DEDD       | -0.22664 | 2.52E-08 |
| NT5DC3     | 0.355055 | 2.52E-08 |
| LOC285696  | 1.264229 | 2.53E-08 |
| VPS53      | -0.21862 | 2.54E-08 |
| ELL2       | 0.217822 | 2.54E-08 |
| PHF20L1    | -0.23269 | 2.55E-08 |
| FOSL2      | -0.20136 | 2.56E-08 |
| CDK5R1     | 0.358031 | 2.57E-08 |
| IL17RA     | 0.263467 | 2.68E-08 |
| EPHB3      | 0.219592 | 2.72E-08 |
| JADE2      | 0.266841 | 2.78E-08 |
| BAIAP3     | 0.56143  | 2.78E-08 |
| BRMS1      | -0.21609 | 2.78E-08 |
| ARAP1      | 0.225608 | 2.78E-08 |
| RPE        | -0.25133 | 2.80E-08 |
| FLJ37201   | 1.433092 | 2.82E-08 |
| AAGAB      | -0.19013 | 2.85E-08 |

|           |          |          |
|-----------|----------|----------|
| PRRG1     | 0.266425 | 2.87E-08 |
| LRRCC1    | 0.332429 | 2.88E-08 |
| MAPK14    | -0.22424 | 2.92E-08 |
| FAM110C   | 0.374144 | 2.94E-08 |
| RHNO1     | -0.22254 | 2.95E-08 |
| NR4A1     | 0.274205 | 2.95E-08 |
| NOD2      | 1.047967 | 2.96E-08 |
| MRPL38    | -0.23282 | 2.98E-08 |
| CHST7     | 0.656484 | 3.03E-08 |
| RGS12     | 0.286352 | 3.06E-08 |
| NIPA1     | 0.258571 | 3.06E-08 |
| C3orf18   | 0.990634 | 3.06E-08 |
| TMEM74B   | 1.077799 | 3.07E-08 |
| FAM53A    | 0.889273 | 3.08E-08 |
| RNF103    | -0.38755 | 3.10E-08 |
| HIST1H2AE | 1.034169 | 3.11E-08 |
| DNAJB11   | -0.18116 | 3.13E-08 |
| ZNF219    | 0.479113 | 3.14E-08 |
| POLR2B    | -0.19551 | 3.16E-08 |
| ZFPL1     | -0.28827 | 3.16E-08 |
| ATAD2     | -0.18278 | 3.17E-08 |
| PCBP2     | -0.14118 | 3.23E-08 |
| MRPS23    | -0.24879 | 3.23E-08 |
| FAHD1     | -0.3644  | 3.24E-08 |
| HSP90AB1  | -0.14564 | 3.25E-08 |
| TRAPPC8   | -0.27704 | 3.25E-08 |
| CD82      | 0.367257 | 3.27E-08 |
| FAM204A   | -0.28619 | 3.28E-08 |
| TRIAP1    | -0.31161 | 3.28E-08 |
| MEOX2     | 0.931165 | 3.30E-08 |
| CREM      | 0.409348 | 3.30E-08 |
| RAB3GAP1  | -0.19578 | 3.38E-08 |
| NXT1      | -0.30876 | 3.38E-08 |
| CXCL8     | -0.27516 | 3.40E-08 |
| UBAP2     | -0.20415 | 3.44E-08 |
| LEPRE1    | -0.24876 | 3.46E-08 |
| PTEN      | -0.19211 | 3.48E-08 |
| WDR78     | 0.867861 | 3.54E-08 |
| PTPRB     | 1.501717 | 3.54E-08 |
| WDR77     | -0.23612 | 3.63E-08 |
| ACBD4     | 0.531975 | 3.64E-08 |
| C7orf49   | -0.21531 | 3.67E-08 |
| PSMA1     | -0.20854 | 3.70E-08 |
| DERL1     | -0.25962 | 3.71E-08 |
| METTL7A   | 0.731232 | 3.72E-08 |
| GCNT2     | 0.437543 | 3.76E-08 |
| LYPLA2    | -0.1986  | 3.79E-08 |

|           |          |          |
|-----------|----------|----------|
| SDPR      | -0.19891 | 3.80E-08 |
| SEMA4C    | -0.37484 | 3.80E-08 |
| LINC00667 | 0.374627 | 3.82E-08 |
| CAND1     | -0.17388 | 3.82E-08 |
| CYP2S1    | 0.288252 | 3.85E-08 |
| PITX2     | 0.390751 | 3.87E-08 |
| C1orf174  | -0.40658 | 3.89E-08 |
| RNF128    | 0.260862 | 3.89E-08 |
| TCF7L1    | 0.658166 | 3.90E-08 |
| TIMM23    | -0.23054 | 3.90E-08 |
| LINC01128 | -0.39731 | 3.98E-08 |
| TTPA      | 1.057231 | 3.98E-08 |
| PIP5K1C   | 0.267687 | 4.04E-08 |
| EDC3      | -0.20696 | 4.08E-08 |
| FBXW5     | -0.20519 | 4.09E-08 |
| TBC1D31   | 0.283452 | 4.12E-08 |
| RHOQ      | 0.672963 | 4.14E-08 |
| MAP2K3    | -0.22735 | 4.22E-08 |
| SMIM5     | 1.564215 | 4.23E-08 |
| MTMR11    | 0.697647 | 4.24E-08 |
| UAP1L1    | 0.32751  | 4.24E-08 |
| STAT2     | -0.25183 | 4.28E-08 |
| CERCAM    | 0.517825 | 4.32E-08 |
| ERGIC2    | -0.32233 | 4.42E-08 |
| FAIM2     | 1.527533 | 4.47E-08 |
| GTF3C6    | -0.24522 | 4.47E-08 |
| C11orf84  | -0.18128 | 4.48E-08 |
| RBPMS     | -0.26039 | 4.50E-08 |
| TMCO3     | -0.22659 | 4.63E-08 |
| MTL5      | 0.541196 | 4.64E-08 |
| MAGEB2    | 0.409691 | 4.68E-08 |
| KRTAP2-3  | 0.476444 | 4.72E-08 |
| NFKB1     | -0.28277 | 4.77E-08 |
| MICAL3    | 0.227826 | 4.78E-08 |
| MYL12A    | -0.16009 | 4.79E-08 |
| SYS1      | -0.2485  | 4.83E-08 |
| SMAGP     | 0.2882   | 4.83E-08 |
| NUDT18    | 0.516483 | 4.84E-08 |
| ARHGEF17  | 0.227648 | 4.88E-08 |
| TOX3      | 0.215565 | 4.92E-08 |
| AKAP3     | 1.361462 | 5.03E-08 |
| LOC285074 | -0.4205  | 5.03E-08 |
| GNAI3     | -0.19433 | 5.05E-08 |
| SLMO2     | -0.20919 | 5.08E-08 |
| DDX56     | -0.19848 | 5.10E-08 |
| SNX13     | -0.28994 | 5.11E-08 |
| FGD1      | 0.83417  | 5.16E-08 |

|            |          |          |
|------------|----------|----------|
| ATP6V0A2   | -0.26052 | 5.19E-08 |
| PAK1IP1    | -0.22098 | 5.25E-08 |
| NLGN2      | 0.312188 | 5.28E-08 |
| PON2       | 0.213713 | 5.28E-08 |
| CLASP1     | -0.18806 | 5.31E-08 |
| HOXC11     | 0.889615 | 5.38E-08 |
| C12orf5    | -0.25942 | 5.43E-08 |
| PRR7       | 0.405355 | 5.46E-08 |
| SYF2       | -0.28189 | 5.51E-08 |
| LUC7L3     | -0.20785 | 5.55E-08 |
| PPP1R12A   | -0.16997 | 5.55E-08 |
| RNASEH1    | -0.28911 | 5.63E-08 |
| SRSF5      | -0.17474 | 5.63E-08 |
| ELAVL1     | -0.17761 | 5.65E-08 |
| SIAH1      | -0.30305 | 5.65E-08 |
| ATP6V1H    | -0.2611  | 5.70E-08 |
| ARRDC3-AS1 | 0.841752 | 5.72E-08 |
| DUS3L      | -0.22685 | 5.75E-08 |
| ZGPAT      | -0.28426 | 5.78E-08 |
| FAM177A1   | -0.30221 | 5.80E-08 |
| ZSCAN29    | -0.25098 | 5.84E-08 |
| HIST1H2AI  | 1.149356 | 5.86E-08 |
| U2AF2      | -0.16112 | 5.88E-08 |
| EWSR1      | -0.15009 | 5.89E-08 |
| HS3ST5     | 1.357518 | 5.91E-08 |
| GFOD1      | 0.748517 | 5.95E-08 |
| DOPEY2     | 0.287012 | 5.98E-08 |
| SLC7A5     | -0.15811 | 6.01E-08 |
| GTF3C3     | -0.22643 | 6.01E-08 |
| GOLT1A     | 0.632127 | 6.09E-08 |
| DCAF5      | -0.20157 | 6.10E-08 |
| ARMC8      | -0.31832 | 6.10E-08 |
| LOC145783  | 1.035296 | 6.12E-08 |
| RAD23A     | -0.16732 | 6.16E-08 |
| PRDM11     | 0.445894 | 6.22E-08 |
| MAU2       | -0.22494 | 6.23E-08 |
| NAA15      | -0.21877 | 6.23E-08 |
| ZC3HC1     | -0.23927 | 6.23E-08 |
| RBMX       | -0.15242 | 6.27E-08 |
| MED23      | -0.22102 | 6.27E-08 |
| SEMA3C     | 0.639161 | 6.28E-08 |
| DHX29      | -0.20768 | 6.29E-08 |
| ETV7       | 1.549871 | 6.34E-08 |
| RRP1B      | -0.20464 | 6.39E-08 |
| DBR1       | -0.24758 | 6.50E-08 |
| RAET1L     | 0.806356 | 6.50E-08 |
| IL10RB     | 0.340699 | 6.53E-08 |

|            |          |          |
|------------|----------|----------|
| ZFAS1      | -0.16906 | 6.56E-08 |
| PEX12      | -0.42937 | 6.59E-08 |
| C5orf15    | -0.19102 | 6.68E-08 |
| ZNF396     | 1.18335  | 6.69E-08 |
| C10orf88   | -0.31025 | 6.75E-08 |
| RSPH1      | 1.414987 | 6.75E-08 |
| SPG7       | -0.31521 | 6.75E-08 |
| C19orf66   | 0.601533 | 6.80E-08 |
| FOXJ3      | -0.26077 | 6.80E-08 |
| LINC00886  | 0.555373 | 6.85E-08 |
| SMPD2      | 0.389431 | 6.90E-08 |
| CCDC112    | 0.276781 | 6.93E-08 |
| DOK1       | 0.336447 | 6.94E-08 |
| RBM26-AS1  | 0.650866 | 6.97E-08 |
| PLEKHA5    | 0.23499  | 6.99E-08 |
| GSK3B      | -0.259   | 7.05E-08 |
| OTUD5      | -0.18095 | 7.11E-08 |
| RNU86      | -0.52061 | 7.12E-08 |
| C6orf15    | 0.343018 | 7.15E-08 |
| MAPKAPK3   | 0.203186 | 7.25E-08 |
| LINC00337  | 1.305321 | 7.30E-08 |
| HIST1H4H   | 0.77624  | 7.31E-08 |
| TAF6L      | -0.28455 | 7.42E-08 |
| SLC16A13   | 0.865763 | 7.42E-08 |
| RRP36      | -0.21571 | 7.43E-08 |
| ZNF484     | -0.42102 | 7.48E-08 |
| CHAC2      | 0.474547 | 7.54E-08 |
| ATP1A1-AS1 | 0.979332 | 7.57E-08 |
| YWHAZ      | -0.14581 | 7.58E-08 |
| FAM192A    | -0.17921 | 7.70E-08 |
| NIPSNAP3B  | 1.569937 | 7.74E-08 |
| ESF1       | -0.20063 | 7.79E-08 |
| IRAK1BP1   | 0.569877 | 7.82E-08 |
| GOLGA7B    | 0.72249  | 7.89E-08 |
| ATP1A1     | 0.156855 | 7.99E-08 |
| LAMB1      | 0.228828 | 8.03E-08 |
| OLFML3     | 0.479416 | 8.06E-08 |
| HELQ       | -0.30672 | 8.07E-08 |
| TMEM154    | 1.186418 | 8.11E-08 |
| CTSV       | 0.47334  | 8.28E-08 |
| RGL3       | 0.363663 | 8.32E-08 |
| CKB        | 0.342627 | 8.34E-08 |
| SMIM12     | -0.326   | 8.43E-08 |
| GPATCH2    | -0.3802  | 8.44E-08 |
| TMPRSS3    | 0.521994 | 8.47E-08 |
| LZTS3      | 0.627    | 8.48E-08 |
| TRAM2-AS1  | 0.482578 | 8.49E-08 |

|           |          |          |
|-----------|----------|----------|
| PCSK1N    | 0.52645  | 8.50E-08 |
| CDK18     | 0.64681  | 8.51E-08 |
| ILF2      | -0.15999 | 8.60E-08 |
| GAP43     | 0.463925 | 8.63E-08 |
| KDELC2    | 0.211725 | 8.72E-08 |
| STYX      | -0.34345 | 8.85E-08 |
| GSE1      | -0.17207 | 9.08E-08 |
| WDR41     | 0.273208 | 9.08E-08 |
| NDOR1     | -0.31958 | 9.08E-08 |
| ZNF711    | 0.232823 | 9.08E-08 |
| LYSMD2    | 0.568661 | 9.09E-08 |
| LMO4      | 0.280563 | 9.10E-08 |
| ZNF554    | 0.964014 | 9.12E-08 |
| ADCK4     | 0.297989 | 9.29E-08 |
| IRX5      | 0.442241 | 9.29E-08 |
| LOC93622  | 0.398957 | 9.35E-08 |
| ARPP19    | -0.1989  | 9.64E-08 |
| COMMD2    | -0.23319 | 9.65E-08 |
| MRPL9     | -0.18639 | 9.77E-08 |
| SNRNP27   | -0.2365  | 9.84E-08 |
| GAS6      | -0.27286 | 9.84E-08 |
| FAM89A    | 0.60949  | 9.84E-08 |
| ENO4      | 1.382026 | 9.91E-08 |
| IGIP      | 0.895123 | 9.94E-08 |
| FCHO1     | 0.37849  | 9.95E-08 |
| MGC57346  | 0.429842 | 1.01E-07 |
| ATXN2     | -0.19602 | 1.02E-07 |
| GAK       | -0.18412 | 1.03E-07 |
| MYCBP2    | 0.226925 | 1.03E-07 |
| OPRL1     | 1.252263 | 1.03E-07 |
| IMP3      | -0.26157 | 1.05E-07 |
| HELZ2     | 0.317425 | 1.06E-07 |
| BCL2L15   | 0.258764 | 1.06E-07 |
| TCAIM     | 0.303477 | 1.07E-07 |
| LINC01011 | 1.02906  | 1.07E-07 |
| KEAP1     | -0.2445  | 1.10E-07 |
| DENND1B   | 0.44506  | 1.12E-07 |
| UBAC2-AS1 | 0.889755 | 1.12E-07 |
| BEX5      | 0.551696 | 1.13E-07 |
| PRAF2     | 0.289276 | 1.16E-07 |
| RRAGC     | -0.3626  | 1.16E-07 |
| PLCG2     | 0.738688 | 1.16E-07 |
| EPT1      | -0.20135 | 1.16E-07 |
| TXNL4B    | -0.22275 | 1.17E-07 |
| CBR4      | 0.289392 | 1.17E-07 |
| CCDC125   | 0.340864 | 1.18E-07 |
| LINC00649 | 0.425092 | 1.18E-07 |



|           |          |          |
|-----------|----------|----------|
| TPX2      | -0.14841 | 1.19E-07 |
| METTL1    | -0.29537 | 1.19E-07 |
| DHX32     | -0.27762 | 1.20E-07 |
| NUDT19    | -0.26079 | 1.21E-07 |
| DOLK      | -0.54385 | 1.21E-07 |
| FLII      | -0.16198 | 1.21E-07 |
| LINC00491 | 0.377768 | 1.23E-07 |
| RHOBTB2   | 0.302141 | 1.25E-07 |
| EIF5A2    | 0.342876 | 1.25E-07 |
| KLHL21    | 0.269588 | 1.25E-07 |
| MCFD2     | -0.18861 | 1.25E-07 |
| RFFL      | 0.635753 | 1.26E-07 |
| HARS      | -0.18251 | 1.26E-07 |
| ADAM17    | -0.28333 | 1.26E-07 |
| MTMR12    | -0.21332 | 1.27E-07 |
| COPA      | -0.15423 | 1.28E-07 |
| FLVCR2    | 0.905915 | 1.30E-07 |
| ZMAT2     | -0.18667 | 1.30E-07 |
| ERAL1     | -0.18371 | 1.31E-07 |
| SUMF2     | 0.18278  | 1.32E-07 |
| SES2      | 0.361834 | 1.32E-07 |
| LOC643406 | 0.602766 | 1.33E-07 |
| ZNF547    | -0.67755 | 1.33E-07 |
| MFSD11    | -0.28338 | 1.34E-07 |
| FGFR1     | 0.20746  | 1.34E-07 |
| METTL14   | -0.31897 | 1.34E-07 |
| GABRR1    | 0.939146 | 1.35E-07 |
| HSD11B2   | 0.31043  | 1.36E-07 |
| RPS6KA1   | 0.241353 | 1.36E-07 |
| ANTXR1    | 0.255176 | 1.37E-07 |
| FAIM3     | 1.397958 | 1.38E-07 |
| FAM199X   | -0.1903  | 1.38E-07 |
| GFER      | -0.23409 | 1.39E-07 |
| TRMT11    | -0.28571 | 1.40E-07 |
| OSBPL5    | 0.383944 | 1.41E-07 |
| RPL14     | -0.16332 | 1.41E-07 |
| OAF       | 0.317432 | 1.41E-07 |
| FJX1      | -0.26732 | 1.41E-07 |
| MCAT      | -0.28668 | 1.42E-07 |
| NFIL3     | 0.286857 | 1.43E-07 |
| PPIG      | -0.23967 | 1.43E-07 |
| GNA12     | 0.229568 | 1.44E-07 |
| SLC25A29  | 0.340396 | 1.45E-07 |
| SLC35D2   | -0.24948 | 1.47E-07 |
| RNF38     | -0.44389 | 1.48E-07 |
| FAM53C    | -0.17616 | 1.48E-07 |
| MAP7D3    | 0.226179 | 1.52E-07 |

|           |          |          |
|-----------|----------|----------|
| HAUS4     | 0.388752 | 1.52E-07 |
| NDUFA12   | -0.21049 | 1.52E-07 |
| PNPLA6    | 0.29291  | 1.52E-07 |
| DMTF1     | -0.19589 | 1.54E-07 |
| CD109     | 0.215312 | 1.55E-07 |
| TBX15     | 0.862207 | 1.55E-07 |
| THNSL1    | 0.477573 | 1.57E-07 |
| FAM111A   | 0.393926 | 1.58E-07 |
| PIGC      | -0.33189 | 1.60E-07 |
| TCEA2     | 0.370218 | 1.61E-07 |
| NXPH4     | 1.277955 | 1.61E-07 |
| TMEM106C  | 0.178963 | 1.61E-07 |
| CYLD      | -0.32176 | 1.62E-07 |
| TIFA      | 0.619202 | 1.66E-07 |
| PITX1     | -0.28369 | 1.66E-07 |
| GDI2      | -0.15087 | 1.66E-07 |
| CLSTN1    | 0.189495 | 1.68E-07 |
| KLF5      | -0.14339 | 1.68E-07 |
| LINC01184 | 0.468001 | 1.69E-07 |
| RASD1     | 0.539553 | 1.72E-07 |
| RALGAPA2  | 0.323493 | 1.72E-07 |
| VWA5A     | 0.442698 | 1.73E-07 |
| LINC00847 | 0.772518 | 1.74E-07 |
| YWHAB     | -0.15623 | 1.74E-07 |
| SH3BP5L   | -0.35424 | 1.76E-07 |
| LBX2-AS1  | 0.665388 | 1.77E-07 |
| MAPKAPK2  | -0.18099 | 1.77E-07 |
| COPS8     | -0.18868 | 1.78E-07 |
| CCDC47    | -0.15502 | 1.78E-07 |
| TMEM109   | 0.18956  | 1.79E-07 |
| MTMR2     | -0.16628 | 1.79E-07 |
| RPARP-AS1 | 0.675687 | 1.80E-07 |
| KCTD1     | 0.408473 | 1.81E-07 |
| CRB2      | 1.116903 | 1.83E-07 |
| LINC01106 | 0.72976  | 1.85E-07 |
| IL10      | 1.155352 | 1.85E-07 |
| VPS37D    | 1.516075 | 1.87E-07 |
| MPZL2     | 0.397894 | 1.88E-07 |
| POLR3E    | -0.25362 | 1.88E-07 |
| KLB       | 1.117177 | 1.88E-07 |
| ANKRD17   | -0.17628 | 1.88E-07 |
| ZNF44     | -0.32461 | 1.89E-07 |
| PRKAR1A   | -0.16684 | 1.90E-07 |
| CIC       | -0.30496 | 1.91E-07 |
| FKBP4     | 0.177537 | 1.93E-07 |
| KIAA1671  | 0.209257 | 1.94E-07 |
| UBE2Q1    | -0.16741 | 1.95E-07 |

|         |          |          |
|---------|----------|----------|
| UBA2    | -0.17578 | 1.96E-07 |
| KIF16B  | 0.267673 | 1.98E-07 |
| PSAT1   | 0.22368  | 1.99E-07 |
| SZRD1   | -0.1534  | 2.00E-07 |
| CARD11  | 0.784399 | 2.01E-07 |
| IWS1    | -0.19842 | 2.03E-07 |
| FAM206A | -0.21483 | 2.06E-07 |
| CTNNB1  | -0.1541  | 2.07E-07 |
| TXLNB   | 1.36651  | 2.08E-07 |
| NAT10   | -0.17145 | 2.09E-07 |
| UBE2C   | -0.16206 | 2.10E-07 |
| ALKBH3  | -0.28455 | 2.10E-07 |
| RPP25L  | 0.33479  | 2.12E-07 |
| ZSCAN32 | -0.29439 | 2.12E-07 |
| WDR37   | -0.35802 | 2.12E-07 |
| RNF167  | -0.18285 | 2.14E-07 |
| NDUFAF7 | -0.32099 | 2.15E-07 |
| HLA-F   | 0.872186 | 2.16E-07 |
| ZBTB25  | 0.784182 | 2.17E-07 |
| PTK6    | 0.435872 | 2.21E-07 |
| HNRNPH1 | -0.16141 | 2.22E-07 |
| TEAD4   | -0.21125 | 2.23E-07 |
| ZNF75A  | 0.279296 | 2.23E-07 |
| GINS1   | -0.25231 | 2.24E-07 |
| KALRN   | 0.806005 | 2.28E-07 |
| ATF1    | -0.2622  | 2.30E-07 |
| MTMR1   | -0.24841 | 2.33E-07 |
| DCAF10  | -0.22654 | 2.34E-07 |
| FRK     | 0.523689 | 2.35E-07 |
| PGS1    | -0.22523 | 2.35E-07 |
| SMKR1   | 0.895642 | 2.35E-07 |
| SNRPB2  | -0.17742 | 2.36E-07 |
| FKBP1B  | 0.75908  | 2.36E-07 |
| ZNF507  | -0.25561 | 2.37E-07 |
| GPR153  | 0.398831 | 2.38E-07 |
| LPP     | 0.278293 | 2.40E-07 |
| ARL8B   | -0.19909 | 2.40E-07 |
| GPR173  | 0.836112 | 2.41E-07 |
| EFHC1   | 0.310864 | 2.42E-07 |
| ZFYVE16 | -0.20041 | 2.42E-07 |
| TMEM14A | 0.379955 | 2.45E-07 |
| TNFRSF9 | 1.246169 | 2.46E-07 |
| TMEM44  | 0.350544 | 2.47E-07 |
| HERC1   | 0.250773 | 2.47E-07 |
| PLEKHG5 | 0.40819  | 2.49E-07 |
| REXO4   | -0.21718 | 2.53E-07 |
| MAPT    | 1.145253 | 2.54E-07 |

|           |          |          |
|-----------|----------|----------|
| HDGF      | -0.13926 | 2.54E-07 |
| PSMB9     | 1.205774 | 2.56E-07 |
| FOPNL     | -0.26254 | 2.59E-07 |
| ZNF526    | -0.39707 | 2.59E-07 |
| ASNS      | 0.257007 | 2.59E-07 |
| EIF4ENIF1 | -0.31572 | 2.60E-07 |
| PIKFYVE   | -0.27135 | 2.60E-07 |
| ATXN7L2   | -0.39408 | 2.62E-07 |
| PRKRIR    | -0.20095 | 2.63E-07 |
| MEX3C     | -0.33007 | 2.65E-07 |
| ZNF607    | 0.567422 | 2.68E-07 |
| ZNF614    | -0.37648 | 2.71E-07 |
| GRIN2D    | 0.811461 | 2.71E-07 |
| ASB2      | 0.592648 | 2.72E-07 |
| METTL7B   | 0.276219 | 2.77E-07 |
| ZNF543    | -0.53314 | 2.79E-07 |
| CEP104    | -0.28415 | 2.81E-07 |
| MED27     | -0.28482 | 2.87E-07 |
| CCL28     | 0.54479  | 2.87E-07 |
| CDCA4     | -0.2761  | 2.88E-07 |
| ITGB6     | 0.838979 | 2.90E-07 |
| CA12      | 1.408909 | 2.95E-07 |
| LOC284412 | 0.542334 | 2.98E-07 |
| AHR       | 0.179931 | 2.98E-07 |
| PPP2R5E   | -0.21062 | 2.98E-07 |
| IGF2R     | 0.181571 | 3.02E-07 |
| MIR3648   | 0.734532 | 3.03E-07 |
| NSA2      | -0.18715 | 3.06E-07 |
| PIAS1     | -0.2943  | 3.08E-07 |
| ISG20     | 0.914439 | 3.11E-07 |
| SLC15A2   | 0.748537 | 3.12E-07 |
| ADAMTS20  | 0.915918 | 3.13E-07 |
| CSPP1     | -0.25048 | 3.13E-07 |
| TRUB2     | -0.22416 | 3.15E-07 |
| NUDCD3    | -0.20514 | 3.15E-07 |
| SLAIN2    | -0.20858 | 3.21E-07 |
| TCP1      | -0.22794 | 3.24E-07 |
| SNW1      | -0.16321 | 3.25E-07 |
| ADAM10    | -0.18661 | 3.29E-07 |
| MID1IP1   | 0.202823 | 3.30E-07 |
| ZNF330    | -0.27228 | 3.31E-07 |
| ZNRF3     | -0.19942 | 3.32E-07 |
| EPHA10    | 0.575638 | 3.34E-07 |
| ACTN1     | -0.14185 | 3.34E-07 |
| CORO6     | 0.807203 | 3.35E-07 |
| NTSR1     | 0.231475 | 3.36E-07 |
| FAM13B    | -0.21477 | 3.36E-07 |

|           |          |          |
|-----------|----------|----------|
| NOP14-AS1 | -0.45312 | 3.37E-07 |
| CCDC103   | -0.70525 | 3.39E-07 |
| ZBED5-AS1 | 0.398441 | 3.40E-07 |
| GPX7      | 0.58019  | 3.41E-07 |
| GOLGA7    | -0.23972 | 3.42E-07 |
| POU2F2    | 0.584728 | 3.43E-07 |
| SMURF2    | -0.30355 | 3.43E-07 |
| RYR1      | 1.357053 | 3.43E-07 |
| CDC5L     | -0.17547 | 3.45E-07 |
| PANX1     | -0.32045 | 3.49E-07 |
| SLC6A6    | 0.224402 | 3.50E-07 |
| SLC7A2    | 1.349627 | 3.50E-07 |
| PPME1     | -0.17747 | 3.50E-07 |
| CPSF2     | -0.19661 | 3.51E-07 |
| PKD2      | 0.304171 | 3.52E-07 |
| LINC00999 | 0.370155 | 3.58E-07 |
| POP7      | -0.23198 | 3.60E-07 |
| CDC42EP3  | -0.17973 | 3.63E-07 |
| LHFPL2    | 0.35875  | 3.65E-07 |
| SULT1C2   | 0.638868 | 3.65E-07 |
| THAP9-AS1 | -0.234   | 3.67E-07 |
| HNRNPA1L2 | -0.38183 | 3.68E-07 |
| CCL20     | -0.6842  | 3.71E-07 |
| ACKR2     | 1.375503 | 3.74E-07 |
| LINC00511 | 0.370678 | 3.77E-07 |
| FRY       | 1.067212 | 3.78E-07 |
| UNC5CL    | 0.51854  | 3.78E-07 |
| MBOAT1    | 0.522086 | 3.80E-07 |
| E4F1      | -0.31127 | 3.80E-07 |
| NPM2      | 0.681146 | 3.82E-07 |
| ITPK1     | 0.18707  | 3.82E-07 |
| SUFU      | 0.287691 | 3.83E-07 |
| PFKP      | 0.167063 | 3.83E-07 |
| SBNO2     | -0.19461 | 3.84E-07 |
| WRAP73    | 0.274672 | 3.91E-07 |
| GLTSCR1   | -0.34035 | 3.96E-07 |
| TBCCD1    | -0.34289 | 3.99E-07 |
| LRRC47    | -0.20492 | 4.01E-07 |
| CTDSPL2   | -0.29754 | 4.02E-07 |
| PBX4      | 0.424412 | 4.03E-07 |
| GNB3      | 1.334204 | 4.06E-07 |
| LOC286437 | 0.655475 | 4.06E-07 |
| ZNF230    | 0.420313 | 4.07E-07 |
| LUC7L     | -0.29627 | 4.08E-07 |
| MRPS18A   | -0.23588 | 4.10E-07 |
| CSNK2B    | -0.18756 | 4.10E-07 |
| NAT14     | 0.295508 | 4.11E-07 |

|           |          |          |
|-----------|----------|----------|
| RBM38     | 0.233845 | 4.11E-07 |
| HIST1H2BF | 0.973437 | 4.14E-07 |
| IMP4      | -0.23391 | 4.14E-07 |
| ALDH3A2   | 0.238211 | 4.17E-07 |
| FAM86JP   | 0.654269 | 4.19E-07 |
| PSMC1     | -0.16593 | 4.22E-07 |
| C12orf75  | 0.301841 | 4.24E-07 |
| AP2A1     | -0.21442 | 4.27E-07 |
| PRMT5     | -0.1619  | 4.32E-07 |
| FAM83G    | 0.231784 | 4.33E-07 |
| SGOL1     | -0.3421  | 4.33E-07 |
| GTPBP1    | -0.23182 | 4.33E-07 |
| NUFIP1    | -0.27567 | 4.33E-07 |
| FMN1      | 0.284726 | 4.34E-07 |
| VWA1      | 0.252409 | 4.35E-07 |
| HACL1     | -0.36779 | 4.37E-07 |
| SHC3      | 0.362103 | 4.38E-07 |
| ATP6V1E1  | -0.18201 | 4.40E-07 |
| POPDC3    | 0.844245 | 4.42E-07 |
| SIK3      | -0.18291 | 4.46E-07 |
| MEX3A     | 0.248348 | 4.47E-07 |
| SEZ6L2    | 0.427208 | 4.47E-07 |
| NDUFB9    | -0.24743 | 4.50E-07 |
| CLN5      | 0.242432 | 4.51E-07 |
| TOLLIP    | -0.25246 | 4.56E-07 |
| NUP160    | -0.17851 | 4.59E-07 |
| ASNSD1    | -0.20294 | 4.64E-07 |
| USP16     | -0.25031 | 4.68E-07 |
| PSMD7     | -0.1667  | 4.78E-07 |
| ZNF818P   | 0.97001  | 4.80E-07 |
| HLA-DQB1  | 0.907838 | 4.82E-07 |
| WDR31     | 1.540465 | 4.84E-07 |
| BBS10     | 0.255932 | 4.98E-07 |
| GPN1      | -0.21011 | 5.02E-07 |
| FSCN1     | 0.174305 | 5.06E-07 |
| RPS19BP1  | -0.23149 | 5.08E-07 |
| AMN1      | 0.471005 | 5.18E-07 |
| MAP3K8    | 0.612976 | 5.24E-07 |
| CCT6P1    | -0.30933 | 5.25E-07 |
| MADD      | -0.16834 | 5.30E-07 |
| MRPS31P5  | -0.33678 | 5.33E-07 |
| MORC3     | -0.21865 | 5.34E-07 |
| WDR62     | -0.1825  | 5.35E-07 |
| FUBP3     | -0.18049 | 5.35E-07 |
| HIST1H3H  | 0.801974 | 5.36E-07 |
| RTCB      | -0.17775 | 5.41E-07 |
| CHRNA1    | -0.18058 | 5.48E-07 |

|          |          |          |
|----------|----------|----------|
| IL15RA   | 1.282445 | 5.51E-07 |
| USP39    | -0.15682 | 5.52E-07 |
| FAM86FP  | 0.496314 | 5.55E-07 |
| ST3GAL4  | 0.37543  | 5.59E-07 |
| PTCHD2   | 0.652278 | 5.63E-07 |
| NARG2    | -0.21671 | 5.64E-07 |
| LPCAT1   | -0.22219 | 5.65E-07 |
| HNF1A    | 0.259198 | 5.72E-07 |
| HDHD3    | 0.452932 | 5.73E-07 |
| RSL24D1  | -0.19823 | 5.75E-07 |
| ASPRV1   | 0.818694 | 5.77E-07 |
| ZFP28    | 0.620794 | 5.77E-07 |
| HGD      | 0.509399 | 5.82E-07 |
| HIP1     | 0.202398 | 5.84E-07 |
| ZC4H2    | 0.502816 | 5.89E-07 |
| MRPS31   | -0.26511 | 5.90E-07 |
| WDR54    | 0.341456 | 5.91E-07 |
| CC2D1A   | 0.178793 | 5.94E-07 |
| ZNF781   | 1.137742 | 5.94E-07 |
| TRNT1    | -0.25189 | 6.00E-07 |
| ZDHHC17  | -0.24013 | 6.02E-07 |
| TUBA3FP  | 0.805023 | 6.05E-07 |
| SAMD4A   | 0.362533 | 6.07E-07 |
| HNRNPM   | -0.13735 | 6.10E-07 |
| CDC123   | -0.17378 | 6.11E-07 |
| FUT8     | 0.258987 | 6.19E-07 |
| CACNA1F  | 0.748454 | 6.30E-07 |
| PARP9    | 0.425247 | 6.33E-07 |
| NFYB     | -0.21149 | 6.35E-07 |
| SLC17A5  | 0.351285 | 6.40E-07 |
| SNAP47   | -0.35187 | 6.47E-07 |
| CLIP4    | 1.00621  | 6.48E-07 |
| E2F2     | 0.454282 | 6.53E-07 |
| DDX60L   | 0.855732 | 6.53E-07 |
| GPS2     | -0.22091 | 6.59E-07 |
| SF3A2    | -0.22766 | 6.66E-07 |
| VWA9     | -0.2144  | 6.75E-07 |
| FAM171A1 | 0.89096  | 6.76E-07 |
| NMU      | 1.233148 | 6.78E-07 |
| HNRNPC   | -0.13826 | 6.85E-07 |
| SIX2     | 1.413287 | 6.90E-07 |
| DDX41    | -0.19711 | 6.91E-07 |
| CREBBP   | -0.20821 | 6.94E-07 |
| KHDRBS1  | -0.14356 | 6.97E-07 |
| PCGF2    | 0.266546 | 6.98E-07 |
| TRIM26   | -0.22857 | 7.02E-07 |
| ABHD10   | 0.263298 | 7.06E-07 |

|           |          |          |
|-----------|----------|----------|
| CHD9      | 0.242016 | 7.07E-07 |
| HIST1H2BC | 0.338662 | 7.10E-07 |
| DDX24     | -0.14843 | 7.10E-07 |
| IMPAD1    | -0.1747  | 7.11E-07 |
| IFIT2     | 0.766134 | 7.13E-07 |
| ALAS1     | -0.19589 | 7.14E-07 |
| NFKB2     | 0.264696 | 7.15E-07 |
| NUP133    | -0.19835 | 7.20E-07 |
| NMT1      | -0.15181 | 7.28E-07 |
| ARID5B    | -0.26595 | 7.28E-07 |
| TAF1      | -0.1814  | 7.34E-07 |
| TMEM65    | 0.443197 | 7.37E-07 |
| HOXC8     | 0.399935 | 7.45E-07 |
| VEZT      | -0.18861 | 7.55E-07 |
| CSNK2A1   | -0.16084 | 7.59E-07 |
| NOLC1     | -0.15404 | 7.63E-07 |
| RTCA      | -0.23888 | 7.65E-07 |
| MMP7      | 1.489049 | 7.66E-07 |
| IQCH-AS1  | 0.655324 | 7.68E-07 |
| GPT2      | 0.185949 | 7.68E-07 |
| VAT1      | 0.220232 | 7.75E-07 |
| LRRC8E    | 0.364826 | 7.80E-07 |
| NCOA2     | 0.29183  | 7.85E-07 |
| ZNF2      | -0.3676  | 7.96E-07 |
| DUSP11    | -0.28797 | 7.98E-07 |
| RBM18     | -0.21613 | 7.99E-07 |
| HES1      | 0.270804 | 7.99E-07 |
| AP1B1     | -0.16077 | 8.15E-07 |
| AADAT     | 0.244657 | 8.20E-07 |
| GPR155    | 0.248852 | 8.31E-07 |
| DENND4A   | -0.23063 | 8.35E-07 |
| POU2F3    | 1.384547 | 8.35E-07 |
| NUDT21    | -0.16311 | 8.47E-07 |
| PSMD2     | -0.14341 | 8.53E-07 |
| TRAFD1    | -0.1918  | 8.65E-07 |
| SELENBP1  | 0.76474  | 8.66E-07 |
| ARHGAP17  | -0.21364 | 8.68E-07 |
| FAM134C   | -0.33697 | 8.76E-07 |
| KIAA1432  | -0.34324 | 8.76E-07 |
| GTPBP10   | -0.24572 | 8.81E-07 |
| KLHL29    | 0.881637 | 8.81E-07 |
| EIF1AX    | -0.1773  | 8.82E-07 |
| AASS      | 0.386221 | 8.85E-07 |
| BSN-AS2   | 1.206476 | 8.85E-07 |
| UBXN4     | -0.15507 | 8.85E-07 |
| LRRC73    | 1.415552 | 8.86E-07 |
| MDFI      | 0.369462 | 8.93E-07 |



|            |          |          |
|------------|----------|----------|
| DUSP9      | 0.909625 | 9.07E-07 |
| HOOK1      | 0.288216 | 9.07E-07 |
| ZER1       | -0.26128 | 9.10E-07 |
| PAR6G      | 0.951545 | 9.38E-07 |
| KCNH6      | 0.92161  | 9.42E-07 |
| LPPR2      | 0.611585 | 9.43E-07 |
| TOM1L1     | 0.225858 | 9.54E-07 |
| USP21      | -0.28252 | 9.55E-07 |
| GABARAPL1  | 0.683092 | 9.57E-07 |
| C19orf43   | -0.15975 | 9.61E-07 |
| MSANTD3    | -0.25595 | 9.62E-07 |
| PAN3       | -0.25743 | 9.69E-07 |
| FAM120AOS  | -0.25286 | 9.73E-07 |
| EGLN1      | -0.21272 | 9.80E-07 |
| NPAS2      | 0.318162 | 9.81E-07 |
| TOMM40     | -0.16412 | 9.83E-07 |
| SUCLA2     | -0.2389  | 9.92E-07 |
| TYW3       | -0.20808 | 9.96E-07 |
| H2AFY2     | 0.167343 | 1.01E-06 |
| CASP8      | 0.492762 | 1.01E-06 |
| DNAJC13    | -0.20514 | 1.01E-06 |
| FAM69A     | 0.375208 | 1.02E-06 |
| AGFG1      | -0.17244 | 1.03E-06 |
| ARFIP1     | -0.21359 | 1.03E-06 |
| ZSWIM3     | -0.34099 | 1.03E-06 |
| LYSMD3     | -0.21265 | 1.05E-06 |
| LIPT2      | 0.531947 | 1.05E-06 |
| ARNTL2     | 0.225845 | 1.06E-06 |
| CIDECF     | -0.34582 | 1.06E-06 |
| NAT1       | -0.332   | 1.06E-06 |
| KAT6B      | -0.22109 | 1.07E-06 |
| HCG11      | -0.3529  | 1.07E-06 |
| CHRNA2     | 0.983409 | 1.08E-06 |
| OPA1       | -0.17548 | 1.09E-06 |
| TXNDC11    | -0.1916  | 1.10E-06 |
| MPDU1      | -0.17793 | 1.10E-06 |
| ELK4       | -0.26202 | 1.11E-06 |
| VPS37A     | -0.24888 | 1.11E-06 |
| MRPL14     | -0.34715 | 1.11E-06 |
| P2RX4      | 0.289944 | 1.12E-06 |
| C1orf216   | 0.415492 | 1.12E-06 |
| PLEKHB1    | 0.170923 | 1.14E-06 |
| PGAM5      | -0.17096 | 1.14E-06 |
| HYOU1      | -0.15187 | 1.16E-06 |
| SQRDL      | 0.261623 | 1.17E-06 |
| SSUH2      | 1.332405 | 1.17E-06 |
| PAXIP1-AS1 | 0.399158 | 1.18E-06 |

|          |          |          |
|----------|----------|----------|
| RPL7L1   | -0.18163 | 1.18E-06 |
| TANC2    | 0.18207  | 1.19E-06 |
| USP9X    | -0.21547 | 1.20E-06 |
| TMEM212  | 0.47445  | 1.20E-06 |
| MLLT11   | 0.2227   | 1.20E-06 |
| RASSF4   | 0.354574 | 1.20E-06 |
| RCAN1    | 0.373442 | 1.21E-06 |
| RIN3     | 0.318313 | 1.21E-06 |
| SPEG     | 1.196381 | 1.21E-06 |
| CEP85L   | 0.460169 | 1.21E-06 |
| TBX2     | -0.28017 | 1.21E-06 |
| PLEKHM2  | -0.22556 | 1.22E-06 |
| CASC3    | -0.16078 | 1.23E-06 |
| SDHAP1   | -0.46942 | 1.23E-06 |
| ZMYM5    | -0.23951 | 1.28E-06 |
| IDH2     | 0.213793 | 1.28E-06 |
| ARHGAP5  | -0.19366 | 1.29E-06 |
| RFXAP    | 0.423921 | 1.30E-06 |
| PDIK1L   | -0.31127 | 1.30E-06 |
| CDK11A   | -0.36569 | 1.30E-06 |
| KIF24    | -0.26524 | 1.30E-06 |
| TVP23B   | -0.46848 | 1.31E-06 |
| CC2D1B   | -0.19855 | 1.32E-06 |
| CPT2     | -0.21308 | 1.33E-06 |
| ACTR3    | -0.16594 | 1.36E-06 |
| COTL1    | 0.197608 | 1.38E-06 |
| FOXRED2  | 0.20424  | 1.38E-06 |
| KBTBD4   | -0.26059 | 1.39E-06 |
| CDT1     | -0.26267 | 1.39E-06 |
| ZNF292   | -0.2662  | 1.41E-06 |
| CGREF1   | 0.2496   | 1.41E-06 |
| TNRC6A   | -0.18776 | 1.41E-06 |
| MMP14    | 0.598492 | 1.41E-06 |
| SOCS5    | -0.40865 | 1.42E-06 |
| PSMD1    | -0.15077 | 1.42E-06 |
| GALK1    | 0.382591 | 1.43E-06 |
| BUB1B    | -0.178   | 1.43E-06 |
| FLNA     | -0.14951 | 1.44E-06 |
| PPFIA1   | -0.14847 | 1.45E-06 |
| SNED1    | 1.038639 | 1.45E-06 |
| TMEM259  | -0.23926 | 1.46E-06 |
| PPAP2C   | 0.274412 | 1.46E-06 |
| TRIM39   | -0.33628 | 1.47E-06 |
| BAHCC1   | 0.450341 | 1.47E-06 |
| KATNBL1  | -0.36124 | 1.49E-06 |
| ANKRD34A | 0.670672 | 1.49E-06 |
| ITGAV    | 0.257758 | 1.49E-06 |

|            |          |          |
|------------|----------|----------|
| ZDHHC13    | 0.252115 | 1.50E-06 |
| PRB3       | 1.123718 | 1.50E-06 |
| TAF7       | -0.19975 | 1.51E-06 |
| VSIG1      | 0.574055 | 1.51E-06 |
| CTSH       | 0.497365 | 1.52E-06 |
| TMED10     | -0.1562  | 1.53E-06 |
| ZNF271     | -0.28962 | 1.53E-06 |
| USP37      | -0.26076 | 1.53E-06 |
| PPM1J      | 1.070239 | 1.54E-06 |
| RRP1       | -0.22226 | 1.55E-06 |
| STK24      | -0.13475 | 1.55E-06 |
| DUSP19     | 0.764728 | 1.55E-06 |
| GTF3C1     | -0.17159 | 1.57E-06 |
| SLC25A16   | -0.33167 | 1.57E-06 |
| ARMC6      | -0.2089  | 1.58E-06 |
| CDC34      | -0.19317 | 1.58E-06 |
| MAP4K4     | 0.173198 | 1.58E-06 |
| LINC00963  | 0.422478 | 1.58E-06 |
| MRPL22     | -0.21588 | 1.60E-06 |
| POLG       | -0.19142 | 1.60E-06 |
| PP7080     | 0.349567 | 1.60E-06 |
| TNNI3      | 1.275144 | 1.61E-06 |
| VPS33A     | -0.22276 | 1.61E-06 |
| NAF1       | -0.27361 | 1.62E-06 |
| MRPL1      | -0.23584 | 1.62E-06 |
| CSTF2      | -0.18052 | 1.62E-06 |
| SNRPA1     | -0.19971 | 1.62E-06 |
| DENND2C    | 1.376981 | 1.63E-06 |
| RBM10      | -0.1499  | 1.64E-06 |
| BOLA1      | 0.562641 | 1.64E-06 |
| PVR        | 0.159316 | 1.65E-06 |
| SLC25A37   | 0.321229 | 1.65E-06 |
| CSPG4      | 1.181095 | 1.65E-06 |
| LOC1019271 | 0.521358 | 1.65E-06 |
| RBL1       | 0.166738 | 1.66E-06 |
| CNTNAP3    | 0.513136 | 1.69E-06 |
| WSB1       | -0.25143 | 1.70E-06 |
| AGPAT4     | 1.262569 | 1.71E-06 |
| LOC1019297 | 0.784703 | 1.72E-06 |
| DYNC1I1    | 0.894362 | 1.73E-06 |
| ANXA11     | -0.13604 | 1.74E-06 |
| PAK4       | -0.19388 | 1.74E-06 |
| PLCB3      | 0.247216 | 1.77E-06 |
| BEAN1      | 0.542946 | 1.77E-06 |
| PANK1      | -0.3313  | 1.79E-06 |
| OGFRL1     | 0.434158 | 1.79E-06 |
| TBC1D16    | 0.176231 | 1.81E-06 |

|          |          |          |
|----------|----------|----------|
| SYT17    | 0.503323 | 1.83E-06 |
| RBM4     | -0.2834  | 1.86E-06 |
| TAF3     | -0.21549 | 1.88E-06 |
| ZNF563   | 0.639675 | 1.89E-06 |
| RCAN3    | 0.436964 | 1.95E-06 |
| CDK5RAP1 | -0.20117 | 1.96E-06 |
| NLRP11   | 1.270081 | 1.96E-06 |
| HLTF     | 0.24049  | 1.97E-06 |
| HFM1     | 0.687588 | 1.98E-06 |
| PAK2     | -0.16175 | 1.98E-06 |
| AQP11    | 1.180236 | 1.99E-06 |
| TMEM8A   | -0.21874 | 1.99E-06 |
| SNHG12   | -0.21486 | 1.99E-06 |
| CUL4B    | -0.16279 | 2.01E-06 |
| ANKFY1   | -0.17538 | 2.04E-06 |
| MIA3     | -0.18998 | 2.04E-06 |
| TTYH2    | 0.507984 | 2.04E-06 |
| SCAF11   | -0.18562 | 2.06E-06 |
| SDSL     | 0.661911 | 2.06E-06 |
| LRRFIP2  | -0.21269 | 2.09E-06 |
| MAPK12   | 0.314095 | 2.11E-06 |
| XKR8     | 0.445965 | 2.12E-06 |
| SLC16A4  | 0.575641 | 2.14E-06 |
| GRB2     | -0.1701  | 2.15E-06 |
| CTPS1    | -0.16037 | 2.17E-06 |
| ATP6V1G1 | -0.21593 | 2.17E-06 |
| MAGT1    | -0.19397 | 2.18E-06 |
| MRPS17   | -0.21569 | 2.18E-06 |
| PCDHGC3  | 0.392    | 2.19E-06 |
| STIP1    | -0.12437 | 2.20E-06 |
| AP5Z1    | -0.24199 | 2.23E-06 |
| CDC27    | -0.16823 | 2.23E-06 |
| PLCD3    | 0.172239 | 2.23E-06 |
| VWA2     | 0.253408 | 2.24E-06 |
| C5       | 0.412476 | 2.26E-06 |
| PHGDH    | 0.301752 | 2.27E-06 |
| SSR1     | -0.16536 | 2.27E-06 |
| GDAP2    | -0.30396 | 2.28E-06 |
| GAR1     | -0.35052 | 2.28E-06 |
| TXN2     | -0.19897 | 2.28E-06 |
| CHAF1A   | -0.20784 | 2.32E-06 |
| SPATA2L  | 0.417394 | 2.32E-06 |
| RIPPLY3  | 0.998125 | 2.33E-06 |
| RC3H2    | -0.27502 | 2.34E-06 |
| DPP9     | -0.16837 | 2.34E-06 |
| BTBD16   | 0.456428 | 2.38E-06 |
| CGRRF1   | -0.41716 | 2.38E-06 |

|              |          |          |
|--------------|----------|----------|
| C11orf58     | -0.16562 | 2.39E-06 |
| UHRF1        | 0.158111 | 2.39E-06 |
| EIF3F        | -0.16129 | 2.41E-06 |
| RNF166       | -0.3011  | 2.42E-06 |
| BUB1         | -0.1713  | 2.42E-06 |
| TTC7A        | 0.23329  | 2.44E-06 |
| IL20RA       | 0.386193 | 2.46E-06 |
| NT5C2        | -0.15911 | 2.46E-06 |
| DESI1        | -0.18317 | 2.46E-06 |
| ANXA5        | -0.14033 | 2.46E-06 |
| ELF1         | -0.19706 | 2.49E-06 |
| LOC389641    | 0.395759 | 2.49E-06 |
| PSMD3        | -0.14785 | 2.50E-06 |
| FMO3         | 1.148132 | 2.51E-06 |
| MAML2        | 0.216351 | 2.52E-06 |
| FAM83D       | -0.24185 | 2.55E-06 |
| MAOB         | 1.115632 | 2.56E-06 |
| ST6GALNAC5   | 0.665432 | 2.56E-06 |
| CYP3A5       | 0.811566 | 2.57E-06 |
| TDRKH        | 0.430864 | 2.59E-06 |
| HIVEP2       | 0.238384 | 2.60E-06 |
| FLJ20021     | 0.757285 | 2.60E-06 |
| VPRBP        | -0.19242 | 2.61E-06 |
| XPA          | -0.2565  | 2.61E-06 |
| PRR5         | 0.462568 | 2.65E-06 |
| CORO2B       | 0.99707  | 2.67E-06 |
| LINC01270    | 1.039586 | 2.71E-06 |
| AIFM2        | 0.162942 | 2.71E-06 |
| DNAJC7       | -0.16115 | 2.71E-06 |
| MLLT1        | -0.17248 | 2.72E-06 |
| GABBR1       | 0.488838 | 2.74E-06 |
| EIF5A        | -0.12445 | 2.78E-06 |
| HEATR5A      | 0.251318 | 2.78E-06 |
| CDC6         | -0.1582  | 2.81E-06 |
| SYNGR1       | 0.499378 | 2.81E-06 |
| TARS         | -0.14039 | 2.83E-06 |
| DHRS4-AS1    | 0.276177 | 2.85E-06 |
| WDR17        | 0.494052 | 2.86E-06 |
| EPB41L4A-AS1 | -0.31001 | 2.89E-06 |
| BAG6         | -0.14065 | 2.89E-06 |
| MKRN2        | -0.18604 | 2.89E-06 |
| INTS10       | -0.17717 | 2.91E-06 |
| NDUFAF4      | -0.26865 | 2.93E-06 |
| FOXN3        | 0.354583 | 2.95E-06 |
| SEC22B       | -0.19518 | 2.96E-06 |
| GJC2         | 0.574086 | 2.97E-06 |
| GSTA4        | 0.450455 | 3.02E-06 |

|             |          |          |
|-------------|----------|----------|
| SORBS1      | 0.573744 | 3.02E-06 |
| VASH2       | 0.689392 | 3.05E-06 |
| GLIS3       | 1.035122 | 3.06E-06 |
| ZNF763      | 0.663078 | 3.06E-06 |
| MPI         | 0.22656  | 3.10E-06 |
| EPHB2       | 0.188406 | 3.11E-06 |
| ANKRD52     | 0.161468 | 3.12E-06 |
| RAP2B       | -0.28225 | 3.13E-06 |
| KDM4A       | -0.17513 | 3.15E-06 |
| FAM216A     | 0.246787 | 3.18E-06 |
| NEK9        | 0.174346 | 3.18E-06 |
| RPUSD1      | -0.24934 | 3.20E-06 |
| TCF3        | 0.14982  | 3.21E-06 |
| ATG4B       | -0.22853 | 3.23E-06 |
| PPIL1       | -0.17445 | 3.23E-06 |
| ZADH2       | -0.35305 | 3.25E-06 |
| LOC284581   | 0.731601 | 3.29E-06 |
| LEO1        | -0.17271 | 3.31E-06 |
| RAB11A      | -0.16435 | 3.31E-06 |
| RARS2       | -0.20853 | 3.37E-06 |
| ZNF276      | -0.33114 | 3.40E-06 |
| TRMT61A     | -0.188   | 3.40E-06 |
| SERBP1      | -0.13168 | 3.41E-06 |
| CD9         | 0.163499 | 3.41E-06 |
| RNF11       | -0.2377  | 3.43E-06 |
| AP2M1       | -0.14173 | 3.43E-06 |
| NGFRAP1     | 0.192119 | 3.43E-06 |
| DCAF15      | -0.18391 | 3.43E-06 |
| HPS3        | 0.169841 | 3.44E-06 |
| GGNBP2      | -0.18834 | 3.48E-06 |
| KARS        | -0.13589 | 3.49E-06 |
| SPON1       | 0.972254 | 3.50E-06 |
| TMEM63C     | 0.676232 | 3.53E-06 |
| SPINT1      | 0.161472 | 3.61E-06 |
| VPS25       | -0.17596 | 3.62E-06 |
| SNX24       | 0.357355 | 3.63E-06 |
| ST3GAL4-AS1 | 1.018701 | 3.66E-06 |
| ZNF672      | 0.205162 | 3.70E-06 |
| MRPS16      | -0.15567 | 3.70E-06 |
| PSMF1       | -0.15186 | 3.70E-06 |
| DDHD2       | 0.232702 | 3.73E-06 |
| GORAB       | -0.21688 | 3.74E-06 |
| PTK2B       | 0.350558 | 3.77E-06 |
| C2orf70     | 0.636179 | 3.80E-06 |
| ABCD3       | -0.18138 | 3.80E-06 |
| LAMP1       | -0.14379 | 3.87E-06 |
| PRDM10      | -0.32436 | 3.87E-06 |

|            |          |          |
|------------|----------|----------|
| 3-Mar      | 0.514592 | 3.88E-06 |
| TMED6      | 0.987942 | 3.92E-06 |
| ATL2       | -0.18768 | 3.92E-06 |
| CBFA2T2    | 0.213273 | 3.92E-06 |
| RFESD      | 0.872598 | 3.95E-06 |
| SEPT7P2    | -0.2333  | 3.95E-06 |
| TMEM55A    | 0.310454 | 4.02E-06 |
| LOC150776  | -0.20339 | 4.03E-06 |
| BCL7B      | -0.17289 | 4.06E-06 |
| PDGFC      | 1.008302 | 4.07E-06 |
| ZKSCAN7    | 0.6592   | 4.10E-06 |
| LGMN       | 0.229347 | 4.12E-06 |
| TUBB       | -0.11975 | 4.12E-06 |
| CEP290     | 0.205167 | 4.14E-06 |
| LINC00659  | 0.711014 | 4.15E-06 |
| SNX25      | -0.20281 | 4.16E-06 |
| DPH3       | -0.2134  | 4.17E-06 |
| SLC25A46   | -0.1996  | 4.17E-06 |
| CSGALNACT2 | 0.162393 | 4.18E-06 |
| ASIC1      | 0.293779 | 4.19E-06 |
| HS1BP3-IT1 | 1.21889  | 4.20E-06 |
| POLR1B     | -0.20013 | 4.22E-06 |
| PPP3R1     | -0.19728 | 4.22E-06 |
| WWC2       | -0.1784  | 4.28E-06 |
| HILPDA     | 0.584889 | 4.28E-06 |
| SLC27A4    | 0.24531  | 4.28E-06 |
| NOXA1      | 0.467976 | 4.32E-06 |
| EPN1       | -0.19392 | 4.36E-06 |
| ZNF561     | -0.2456  | 4.40E-06 |
| HSPA13     | -0.25442 | 4.43E-06 |
| SKP1       | -0.16769 | 4.50E-06 |
| RETSAT     | 0.237019 | 4.55E-06 |
| BOLA3-AS1  | 0.627852 | 4.55E-06 |
| PSIP1      | 0.174744 | 4.57E-06 |
| C9orf78    | -0.18506 | 4.59E-06 |
| C6orf106   | -0.18072 | 4.60E-06 |
| NEO1       | 0.187761 | 4.63E-06 |
| GNPDA2     | 0.313952 | 4.64E-06 |
| WDR53      | -0.33583 | 4.65E-06 |
| KBTBD6     | 0.457696 | 4.67E-06 |
| HARS2      | -0.19153 | 4.76E-06 |
| SOAT2      | 0.534841 | 4.77E-06 |
| STX1A      | 0.270199 | 4.78E-06 |
| INPP5D     | 0.190799 | 4.79E-06 |
| FGGY       | 0.267494 | 4.89E-06 |
| PDE8A      | 0.175907 | 4.89E-06 |
| NUP85      | -0.19368 | 4.96E-06 |

|            |          |          |
|------------|----------|----------|
| PKHD1      | 0.46237  | 4.98E-06 |
| HOXA10-AS  | -0.36324 | 4.98E-06 |
| TMEM132A   | 0.238335 | 4.99E-06 |
| TBC1D24    | 0.405474 | 5.02E-06 |
| NCOR2      | 0.133598 | 5.03E-06 |
| LGALS1     | 0.267706 | 5.04E-06 |
| ZC3H10     | 0.390449 | 5.07E-06 |
| TATDN2     | -0.20533 | 5.09E-06 |
| KIAA2018   | -0.35085 | 5.11E-06 |
| MEAF6      | -0.18543 | 5.12E-06 |
| SCAI       | 0.342113 | 5.13E-06 |
| SLC12A9    | 0.403597 | 5.26E-06 |
| KCTD17     | 0.363981 | 5.26E-06 |
| ZNF84      | 0.284782 | 5.32E-06 |
| INADL      | 0.253061 | 5.45E-06 |
| CTR9       | -0.15662 | 5.48E-06 |
| MOK        | -0.37527 | 5.49E-06 |
| ZBTB48     | -0.24335 | 5.51E-06 |
| KIF1A      | 0.581832 | 5.52E-06 |
| MRPL2      | -0.2204  | 5.56E-06 |
| LEMD2      | -0.20508 | 5.56E-06 |
| YLPM1      | -0.16481 | 5.58E-06 |
| MSRB3      | 0.200136 | 5.61E-06 |
| LOC1019278 | 0.630019 | 5.61E-06 |
| UPF2       | -0.17719 | 5.63E-06 |
| ZNF571     | 0.52786  | 5.64E-06 |
| ZRSR2      | -0.27795 | 5.65E-06 |
| SH3BP4     | -0.14869 | 5.67E-06 |
| KHK        | 0.354438 | 5.68E-06 |
| DHX33      | -0.18865 | 5.70E-06 |
| RNF170     | 0.295688 | 5.71E-06 |
| IRF9       | -0.53192 | 5.74E-06 |
| ZDHHC23    | 0.546393 | 5.75E-06 |
| C1D        | -0.31811 | 5.78E-06 |
| GOLIM4     | 0.233602 | 5.79E-06 |
| ZNF564     | -0.27216 | 5.80E-06 |
| NDRG1      | 0.546007 | 5.81E-06 |
| ROR1       | 0.496733 | 5.81E-06 |
| ZNF845     | -0.24781 | 5.82E-06 |
| RXRB       | -0.25958 | 5.82E-06 |
| VIMP       | -0.24076 | 5.83E-06 |
| ANKRD55    | 0.761049 | 5.84E-06 |
| TES        | -0.15874 | 5.96E-06 |
| IBTK       | -0.19042 | 5.96E-06 |
| VWA5B2     | 0.333115 | 5.97E-06 |
| TUBD1      | -0.37887 | 6.02E-06 |
| FGF1       | 1.129479 | 6.05E-06 |



|             |          |          |
|-------------|----------|----------|
| KLHL22      | 0.408159 | 6.07E-06 |
| VANGL1      | 0.27904  | 6.07E-06 |
| ERC1        | 0.185407 | 6.08E-06 |
| ORC6        | -0.16401 | 6.08E-06 |
| SFN         | -0.19811 | 6.09E-06 |
| ZNF593      | -0.22256 | 6.14E-06 |
| CHN1        | 0.208409 | 6.16E-06 |
| AZI2        | -0.20162 | 6.20E-06 |
| CSTF2T      | -0.18209 | 6.20E-06 |
| IPO4        | -0.17532 | 6.25E-06 |
| RASSF2      | 1.103066 | 6.25E-06 |
| PSMA6       | -0.15557 | 6.26E-06 |
| MEMO1       | -0.23147 | 6.27E-06 |
| SDCBP       | 0.163741 | 6.27E-06 |
| ELMO3       | -0.68697 | 6.30E-06 |
| TAF1C       | -0.33383 | 6.30E-06 |
| ZBTB7C      | 0.363383 | 6.32E-06 |
| LINC00668   | 1.18764  | 6.34E-06 |
| DUSP1       | -0.21971 | 6.36E-06 |
| TRIM28      | -0.17092 | 6.37E-06 |
| LRRC37A6P   | 1.186916 | 6.38E-06 |
| MAPKAPK5-/- | -0.32065 | 6.43E-06 |
| CXCL3       | -0.4838  | 6.45E-06 |
| ABLIM3      | 0.362574 | 6.48E-06 |
| ATG3        | -0.186   | 6.55E-06 |
| ZBTB44      | -0.22263 | 6.55E-06 |
| CTBP1       | -0.19145 | 6.56E-06 |
| ADAP1       | 0.261496 | 6.56E-06 |
| SLC43A1     | 0.231345 | 6.56E-06 |
| CALM1       | 0.160331 | 6.62E-06 |
| CBFB        | -0.13526 | 6.67E-06 |
| ZNF397      | 0.549818 | 6.67E-06 |
| DNAJC11     | -0.14677 | 6.71E-06 |
| BCCIP       | -0.17858 | 6.74E-06 |
| SSBP2       | 0.248972 | 6.75E-06 |
| FGFR1OP     | -0.31528 | 6.76E-06 |
| DNAH12      | 0.653933 | 6.80E-06 |
| PLIN2       | 0.154645 | 6.82E-06 |
| UBE2I       | -0.13856 | 6.93E-06 |
| ATP1B2      | 1.011795 | 6.94E-06 |
| LINC01152   | 1.323582 | 6.97E-06 |
| PSMB2       | -0.14109 | 7.01E-06 |
| ZNF433      | 0.613502 | 7.04E-06 |
| ANKRD31     | 1.001516 | 7.11E-06 |
| PJA2        | -0.17094 | 7.12E-06 |
| PROX1       | 0.262069 | 7.17E-06 |
| MRPS11      | -0.2062  | 7.17E-06 |

|            |          |          |
|------------|----------|----------|
| LPAR2      | 0.483867 | 7.19E-06 |
| RPN1       | -0.13918 | 7.24E-06 |
| TRPM2      | 0.460593 | 7.24E-06 |
| PTPN2      | -0.17018 | 7.27E-06 |
| BACE2      | 0.167293 | 7.28E-06 |
| LINC01061  | 0.49131  | 7.29E-06 |
| DECR2      | 0.335456 | 7.29E-06 |
| SPRY4      | -0.1876  | 7.30E-06 |
| CCDC134    | 0.518255 | 7.33E-06 |
| DLL3       | 1.047962 | 7.33E-06 |
| LUZP1      | 0.179282 | 7.34E-06 |
| MNX1-AS1   | 0.583668 | 7.34E-06 |
| DHX15      | -0.12997 | 7.40E-06 |
| PRODH2     | 0.57731  | 7.40E-06 |
| TEC        | 0.471538 | 7.47E-06 |
| LOC1019295 | 0.373904 | 7.53E-06 |
| SUV39H2    | -0.2442  | 7.55E-06 |
| TBC1D2     | 0.282882 | 7.55E-06 |
| USP18      | 0.328303 | 7.55E-06 |
| LOC399815  | 0.74079  | 7.63E-06 |
| SPRYD4     | -0.47484 | 7.67E-06 |
| CAPN12     | 0.78393  | 7.71E-06 |
| DHX9       | -0.13627 | 7.71E-06 |
| ZNF827     | 0.368981 | 7.76E-06 |
| ARPC1A     | -0.18016 | 7.77E-06 |
| CAPN15     | -0.3488  | 7.77E-06 |
| KIAA1804   | 0.269327 | 7.78E-06 |
| GUSBP5     | 1.031789 | 7.85E-06 |
| EFNB3      | 0.798954 | 7.91E-06 |
| TCF25      | -0.17142 | 8.01E-06 |
| NUDC       | -0.15121 | 8.14E-06 |
| RAP1B      | -0.15105 | 8.14E-06 |
| GBF1       | -0.14778 | 8.20E-06 |
| EIF3G      | -0.14805 | 8.21E-06 |
| CHD7       | 0.220518 | 8.22E-06 |
| AFF4       | -0.17429 | 8.29E-06 |
| CCDC85B    | 0.202691 | 8.29E-06 |
| ZCCHC2     | 0.388658 | 8.32E-06 |
| ABCB6      | 0.32439  | 8.33E-06 |
| DGCR8      | -0.23561 | 8.33E-06 |
| ZFYVE1     | -0.31092 | 8.33E-06 |
| FMR1       | -0.19591 | 8.39E-06 |
| API5       | -0.1442  | 8.41E-06 |
| MCF2L      | 0.296575 | 8.42E-06 |
| CEACAM19   | 0.585366 | 8.46E-06 |
| C1orf43    | -0.1372  | 8.56E-06 |
| ZMPSTE24   | -0.18371 | 8.57E-06 |

|            |          |          |
|------------|----------|----------|
| FAM134A    | -0.23194 | 8.66E-06 |
| CCT6A      | -0.12367 | 8.68E-06 |
| SPOCD1     | 1.014249 | 8.70E-06 |
| ARL14EP    | -0.25306 | 8.72E-06 |
| RYK        | -0.17921 | 8.76E-06 |
| MGAT5B     | 0.17171  | 8.76E-06 |
| ZNF337     | 0.330997 | 8.77E-06 |
| MARK4      | 0.329686 | 8.80E-06 |
| LOC1019283 | 0.971548 | 8.84E-06 |
| NDRG3      | 0.249806 | 8.85E-06 |
| LAMTOR1    | -0.18025 | 8.87E-06 |
| VDAC1      | -0.15942 | 8.91E-06 |
| SEC63      | -0.17225 | 8.94E-06 |
| BIRC2      | -0.16193 | 8.95E-06 |
| MRPL36     | -0.23653 | 8.95E-06 |
| ATP5F1     | -0.14197 | 8.96E-06 |
| CREB3      | -0.21722 | 9.00E-06 |
| MCTP2      | 0.45324  | 9.03E-06 |
| MRPL45     | -0.19682 | 9.04E-06 |
| ZNF687     | -0.18283 | 9.06E-06 |
| CUL9       | 0.268317 | 9.10E-06 |
| SLC35C2    | -0.1824  | 9.11E-06 |
| ACOX1      | -0.18594 | 9.13E-06 |
| FKBP9P1    | 0.470473 | 9.17E-06 |
| OGDH       | 0.151057 | 9.17E-06 |
| ARIH2      | -0.17003 | 9.18E-06 |
| POGZ       | -0.14037 | 9.22E-06 |
| EFTUD2     | -0.13686 | 9.27E-06 |
| SLC47A1    | 0.933879 | 9.31E-06 |
| PSMB4      | -0.15093 | 9.32E-06 |
| FAM109B    | 0.839142 | 9.37E-06 |
| KIF2A      | -0.19877 | 9.45E-06 |
| SCAMP1-AS1 | 0.297421 | 9.47E-06 |
| FKBP15     | -0.19847 | 9.49E-06 |
| DDB2       | 0.201479 | 9.50E-06 |
| UBE2D2     | -0.14744 | 9.52E-06 |
| TULP3      | 0.187901 | 9.58E-06 |
| SGK2       | 0.649958 | 9.64E-06 |
| EGR3       | 0.166435 | 9.74E-06 |
| PIM2       | -0.21592 | 9.83E-06 |
| PYCR2      | -0.18152 | 9.89E-06 |
| ASF1A      | -0.1675  | 1.00E-05 |
| LINC00506  | 0.841934 | 1.00E-05 |
| HEATR1     | -0.14813 | 1.01E-05 |
| MED16      | -0.21088 | 1.01E-05 |
| LINC00493  | -0.29557 | 1.01E-05 |
| VAMP1      | 0.448937 | 1.02E-05 |

|            |          |          |
|------------|----------|----------|
| NAA20      | -0.21969 | 1.02E-05 |
| TGFBI      | -0.17557 | 1.02E-05 |
| RWDD1      | -0.18458 | 1.03E-05 |
| RHEB       | -0.15035 | 1.03E-05 |
| ST7        | -0.18867 | 1.03E-05 |
| NUP107     | -0.15073 | 1.04E-05 |
| C1orf56    | 0.552242 | 1.04E-05 |
| ZNF653     | -0.36416 | 1.04E-05 |
| CORO1C     | -0.13545 | 1.05E-05 |
| GXYLT2     | 0.916317 | 1.06E-05 |
| MAPRE1     | -0.15394 | 1.07E-05 |
| NOTCH3     | 0.809433 | 1.07E-05 |
| MFSD1      | -0.27099 | 1.07E-05 |
| ALDH1B1    | 0.217551 | 1.07E-05 |
| LOC1002870 | 0.646487 | 1.08E-05 |
| TNFRSF19   | 0.267471 | 1.08E-05 |
| ZNF630     | 0.613793 | 1.09E-05 |
| NUCB2      | 0.197124 | 1.10E-05 |
| TOP3A      | -0.17836 | 1.10E-05 |
| TOE1       | -0.18006 | 1.10E-05 |
| POLD3      | -0.18099 | 1.10E-05 |
| HIST2H2BF  | 0.583944 | 1.10E-05 |
| MAGED2     | 0.149845 | 1.11E-05 |
| ATG12      | -0.17709 | 1.11E-05 |
| ZNF490     | -0.36714 | 1.11E-05 |
| SLC29A4    | 0.910264 | 1.15E-05 |
| HIC2       | -0.36902 | 1.15E-05 |
| ZBTB3      | -0.75322 | 1.16E-05 |
| ZNF628     | -0.32027 | 1.16E-05 |
| GALT       | 0.294819 | 1.16E-05 |
| NBPF3      | 0.287446 | 1.16E-05 |
| PHYKPL     | 0.395303 | 1.16E-05 |
| SOX30      | 0.932552 | 1.17E-05 |
| ZFP62      | 0.278121 | 1.17E-05 |
| IDH1       | 0.230774 | 1.17E-05 |
| RAD54B     | 0.271378 | 1.17E-05 |
| ENO3       | 0.275603 | 1.17E-05 |
| THG1L      | -0.23191 | 1.20E-05 |
| HSF1       | -0.21249 | 1.20E-05 |
| SLC35F6    | -0.22363 | 1.20E-05 |
| LUCAT1     | 0.644582 | 1.21E-05 |
| WDR11      | -0.18862 | 1.21E-05 |
| SMPDL3B    | 0.611928 | 1.21E-05 |
| FAM92A1    | 0.289378 | 1.21E-05 |
| INPP5K     | -0.23369 | 1.22E-05 |
| TTI1       | -0.17774 | 1.22E-05 |
| GNS        | -0.23621 | 1.23E-05 |

|          |          |          |
|----------|----------|----------|
| MLXIPL   | 0.415768 | 1.23E-05 |
| TXNDC9   | -0.20209 | 1.23E-05 |
| B3GALNT1 | 0.47285  | 1.23E-05 |
| CCDC74A  | 0.455966 | 1.24E-05 |
| PHACTR4  | -0.20515 | 1.24E-05 |
| OBFC1    | 0.271259 | 1.24E-05 |
| COMMD5   | -0.29833 | 1.24E-05 |
| 10-Sep   | 0.183578 | 1.25E-05 |
| COL11A2  | 0.808227 | 1.25E-05 |
| EXOSC3   | -0.21194 | 1.26E-05 |
| FAM21A   | -0.16829 | 1.28E-05 |
| PSPC1    | -0.1575  | 1.30E-05 |
| CDKN2C   | -0.28437 | 1.31E-05 |
| ZNF223   | -0.34903 | 1.31E-05 |
| ZNF395   | 0.20468  | 1.31E-05 |
| PSMB6    | -0.16061 | 1.31E-05 |
| FAM86DP  | 0.337567 | 1.32E-05 |
| GNL3L    | -0.18034 | 1.32E-05 |
| UNC13A   | 1.072311 | 1.32E-05 |
| RAD17    | -0.24046 | 1.32E-05 |
| FIP1L1   | -0.1444  | 1.33E-05 |
| RCSD1    | 0.37447  | 1.35E-05 |
| SMARCE1  | -0.14028 | 1.35E-05 |
| ZBTB26   | -0.49223 | 1.36E-05 |
| TMEM186  | -0.54379 | 1.36E-05 |
| PWWP2A   | -0.19226 | 1.37E-05 |
| EMP3     | 0.273725 | 1.37E-05 |
| EHD4     | -0.13149 | 1.37E-05 |
| MYO10    | 0.213797 | 1.38E-05 |
| CUL4A    | -0.14683 | 1.38E-05 |
| NBPF10   | 1.068965 | 1.38E-05 |
| C5orf34  | -0.20132 | 1.38E-05 |
| FLJ37453 | 0.497569 | 1.39E-05 |
| POLR2C   | -0.14514 | 1.39E-05 |
| ARHGEF39 | 0.266505 | 1.40E-05 |
| C1GALT1  | -0.1865  | 1.41E-05 |
| GOLGA4   | -0.19941 | 1.41E-05 |
| FADS2    | 0.325556 | 1.42E-05 |
| PPIC     | 0.564532 | 1.43E-05 |
| GRK6     | -0.19956 | 1.43E-05 |
| PHF13    | 0.556728 | 1.43E-05 |
| ZNF514   | 0.693494 | 1.43E-05 |
| FBXO18   | -0.19839 | 1.44E-05 |
| C21orf67 | 0.851271 | 1.44E-05 |
| ASAH1    | 0.222226 | 1.45E-05 |
| SHISA4   | 0.420378 | 1.46E-05 |
| HAS3     | 0.181469 | 1.47E-05 |

|            |          |          |
|------------|----------|----------|
| ALS2       | -0.21905 | 1.47E-05 |
| PRR14      | 0.236648 | 1.47E-05 |
| SEC31A     | -0.15486 | 1.47E-05 |
| FLT3LG     | 0.830232 | 1.47E-05 |
| ARHGEF25   | 0.376249 | 1.48E-05 |
| OTULIN     | -0.2128  | 1.48E-05 |
| PNKD       | 0.252884 | 1.50E-05 |
| MRPL18     | -0.15948 | 1.50E-05 |
| DCUN1D5    | -0.15704 | 1.51E-05 |
| ZNF302     | 0.226235 | 1.51E-05 |
| BRIP1      | -0.18047 | 1.52E-05 |
| CATSPER1   | 0.53359  | 1.52E-05 |
| STAT5B     | 0.280035 | 1.53E-05 |
| RHOA       | -0.13871 | 1.53E-05 |
| CTDP1      | -0.22894 | 1.54E-05 |
| NSUN6      | -0.23592 | 1.54E-05 |
| LOC1019277 | 0.788004 | 1.55E-05 |
| PRKCG      | 1.193732 | 1.56E-05 |
| NSRP1      | -0.16905 | 1.56E-05 |
| ZNF100     | -0.22305 | 1.56E-05 |
| RMND5A     | -0.20859 | 1.57E-05 |
| ZNF233     | 0.621684 | 1.58E-05 |
| IGBP1      | -0.21875 | 1.59E-05 |
| PPP3CC     | -0.20913 | 1.59E-05 |
| PROSER1    | -0.19165 | 1.59E-05 |
| APEX2      | -0.16048 | 1.59E-05 |
| XPO4       | -0.21269 | 1.59E-05 |
| HSD3B7     | 0.338647 | 1.59E-05 |
| ZNF841     | -0.32469 | 1.60E-05 |
| TMEM9      | 0.224498 | 1.60E-05 |
| TNFRSF10A  | 0.313897 | 1.60E-05 |
| RAD51AP2   | 1.018589 | 1.61E-05 |
| RAPGEF3    | 0.562018 | 1.62E-05 |
| POFUT1     | 0.147695 | 1.63E-05 |
| FSCN2      | 1.115563 | 1.64E-05 |
| FNTA       | -0.16824 | 1.66E-05 |
| ARHGAP44   | 0.693988 | 1.67E-05 |
| LINC01186  | 0.731199 | 1.69E-05 |
| ARPC2      | -0.13622 | 1.69E-05 |
| RUNDC3A    | 0.773737 | 1.70E-05 |
| SYNE2      | 0.366125 | 1.73E-05 |
| IFNAR1     | -0.19992 | 1.73E-05 |
| MYO18A     | 0.164269 | 1.74E-05 |
| ST7-AS1    | 0.709804 | 1.74E-05 |
| SF3B2      | -0.1327  | 1.76E-05 |
| LOC284454  | -1.0056  | 1.78E-05 |
| VEPH1      | 0.783973 | 1.78E-05 |

|            |          |          |
|------------|----------|----------|
| RBM23      | -0.16903 | 1.79E-05 |
| DBT        | -0.19291 | 1.81E-05 |
| EXOC1      | -0.19488 | 1.82E-05 |
| UTP23      | -0.179   | 1.82E-05 |
| GCLM       | 0.255349 | 1.83E-05 |
| ACSF2      | 0.547066 | 1.83E-05 |
| RECQL5     | -0.21061 | 1.83E-05 |
| CLTCL1     | 0.731385 | 1.84E-05 |
| NABP2      | 0.159293 | 1.84E-05 |
| SYT8       | 0.738907 | 1.84E-05 |
| ALKBH2     | 0.374361 | 1.84E-05 |
| SELK       | -0.28771 | 1.85E-05 |
| PRELID2    | 0.415217 | 1.87E-05 |
| BEND7      | 0.850575 | 1.88E-05 |
| FLJ44511   | 0.845351 | 1.88E-05 |
| HIST1H1T   | 1.050353 | 1.88E-05 |
| ADAT3      | 0.418806 | 1.88E-05 |
| C19orf52   | -0.29757 | 1.90E-05 |
| DAAM1      | -0.20546 | 1.90E-05 |
| HIST1H2BK  | 0.186291 | 1.92E-05 |
| MAST4      | -0.23409 | 1.92E-05 |
| PSMB1      | -0.1568  | 1.92E-05 |
| VMP1       | -0.16347 | 1.92E-05 |
| MLLT4      | 0.170376 | 1.93E-05 |
| ATP6V0E1   | -0.19404 | 1.94E-05 |
| RPL13AP20  | 0.894157 | 1.95E-05 |
| SLC9A5     | 0.601745 | 1.96E-05 |
| NOP14      | -0.13248 | 1.96E-05 |
| NEMF       | -0.16653 | 1.97E-05 |
| PLAC1      | 1.032526 | 1.98E-05 |
| SRSF8      | -0.15174 | 1.99E-05 |
| PRICKLE2   | 0.686989 | 1.99E-05 |
| TFCP2      | -0.15377 | 1.99E-05 |
| SNRPB      | -0.13595 | 1.99E-05 |
| GNRHR2     | 0.797678 | 1.99E-05 |
| LOC1003792 | 0.984873 | 1.99E-05 |
| LOC400863  | 1.011781 | 2.01E-05 |
| ZNF646     | -0.1904  | 2.01E-05 |
| CCDC7      | 0.699235 | 2.02E-05 |
| HCFC1R1    | 0.427361 | 2.02E-05 |
| TBC1D25    | -0.26505 | 2.11E-05 |
| HIST1H3E   | -0.8789  | 2.11E-05 |
| FUT2       | 1.091761 | 2.14E-05 |
| NSMAF      | -0.16418 | 2.15E-05 |
| GNA11      | -0.17878 | 2.15E-05 |
| AATK       | 1.015248 | 2.15E-05 |
| PTP4A2     | -0.14301 | 2.16E-05 |

|            |          |          |
|------------|----------|----------|
| LENG9      | 0.751996 | 2.17E-05 |
| TP53I13    | 0.402865 | 2.17E-05 |
| PLK1       | -0.184   | 2.20E-05 |
| CCDC121    | 0.465108 | 2.21E-05 |
| DCAF13     | -0.16275 | 2.21E-05 |
| BAMBI      | -0.19286 | 2.23E-05 |
| LINC01234  | 0.393308 | 2.23E-05 |
| LOC1005059 | 0.677369 | 2.28E-05 |
| CENPO      | -0.16059 | 2.28E-05 |
| CES2       | -0.1492  | 2.30E-05 |
| ERV3-1     | 0.444833 | 2.32E-05 |
| DDX46      | -0.1427  | 2.33E-05 |
| CCDC40     | 0.315261 | 2.34E-05 |
| ZNF236     | 0.310528 | 2.34E-05 |
| NAGPA      | -0.29689 | 2.35E-05 |
| CHPF       | -0.18476 | 2.36E-05 |
| LOC1027238 | 0.541311 | 2.37E-05 |
| TTC18      | 0.925958 | 2.38E-05 |
| CFL1       | -0.12388 | 2.38E-05 |
| CSMD3      | 0.429692 | 2.39E-05 |
| SYDE2      | 0.593689 | 2.40E-05 |
| CDKN2AIP   | -0.16427 | 2.41E-05 |
| KLHL42     | 0.170804 | 2.41E-05 |
| DDN        | 0.693198 | 2.42E-05 |
| CRTC2      | -0.19285 | 2.42E-05 |
| GTF2H5     | 0.229595 | 2.42E-05 |
| WASH1      | -0.31511 | 2.43E-05 |
| DPH2       | -0.1705  | 2.44E-05 |
| IFT81      | 0.18712  | 2.45E-05 |
| SLC29A2    | 0.404657 | 2.46E-05 |
| DEPDC7     | 0.182599 | 2.47E-05 |
| RBPJ       | -0.18834 | 2.47E-05 |
| CERS6      | 0.172466 | 2.47E-05 |
| DDX51      | -0.17381 | 2.47E-05 |
| DYNLT3     | 0.182504 | 2.48E-05 |
| TAX1BP1    | -0.14482 | 2.48E-05 |
| CST7       | 0.202048 | 2.49E-05 |
| ARMC2      | 0.675387 | 2.50E-05 |
| RNFT2      | 0.653624 | 2.52E-05 |
| EVA1C      | 0.40242  | 2.54E-05 |
| PRPS2      | 0.189145 | 2.55E-05 |
| ZNF470     | 0.452925 | 2.56E-05 |
| QRSL1      | -0.20193 | 2.56E-05 |
| PCED1A     | 0.28527  | 2.58E-05 |
| PNPLA2     | -0.18495 | 2.58E-05 |
| KIAA1211   | 0.263692 | 2.58E-05 |
| MPG        | 0.186739 | 2.60E-05 |



|           |          |          |
|-----------|----------|----------|
| LOC440300 | 0.999833 | 2.61E-05 |
| PTBP3     | -0.15385 | 2.61E-05 |
| ANKMY2    | 0.204153 | 2.64E-05 |
| VPS33B    | -0.24843 | 2.66E-05 |
| FMNL1     | 0.187794 | 2.66E-05 |
| PLA2G4D   | 0.943878 | 2.67E-05 |
| SBF2      | 0.155505 | 2.67E-05 |
| SAP18     | -0.15663 | 2.69E-05 |
| SEC24D    | 0.291272 | 2.70E-05 |
| ANPEP     | 1.024518 | 2.70E-05 |
| LRRC58    | -0.17652 | 2.70E-05 |
| CADM4     | 0.27812  | 2.71E-05 |
| CES1      | 1.026924 | 2.71E-05 |
| RFX1      | -0.25744 | 2.71E-05 |
| C1orf105  | 0.82057  | 2.71E-05 |
| ZNF326    | -0.15574 | 2.72E-05 |
| MOGS      | -0.26471 | 2.73E-05 |
| MYLIP     | 0.383007 | 2.73E-05 |
| 8-Mar     | -0.24441 | 2.74E-05 |
| QPCT      | 0.370205 | 2.74E-05 |
| CARS      | -0.14108 | 2.74E-05 |
| GIGYF1    | -0.37373 | 2.76E-05 |
| CAMK4     | 0.528519 | 2.76E-05 |
| MMP25     | -1.02288 | 2.77E-05 |
| TAF9      | -0.15584 | 2.80E-05 |
| CCDC88A   | 0.173922 | 2.82E-05 |
| MZF1      | 0.388143 | 2.84E-05 |
| AOC3      | -0.72285 | 2.84E-05 |
| CSRP2BP   | 0.406348 | 2.85E-05 |
| BBX       | 0.239005 | 2.85E-05 |
| CREBL2    | -0.20735 | 2.87E-05 |
| CUX1      | 0.164367 | 2.88E-05 |
| LASP1     | -0.12298 | 2.88E-05 |
| BUB3      | -0.13819 | 2.88E-05 |
| IQCE      | 0.192664 | 2.89E-05 |
| ATAD3B    | -0.20036 | 2.90E-05 |
| GCH1      | 0.237988 | 2.91E-05 |
| CD44      | 0.348239 | 2.93E-05 |
| SHANK2    | 0.309617 | 2.93E-05 |
| ZNF48     | 0.234665 | 2.93E-05 |
| CHD3      | 0.182452 | 2.95E-05 |
| MAP4K2    | 0.336905 | 2.97E-05 |
| LOC202181 | 0.487451 | 3.00E-05 |
| AMER1     | 0.334811 | 3.00E-05 |
| PELP1     | -0.15006 | 3.04E-05 |
| CAV1      | -0.13598 | 3.05E-05 |
| MED7      | -0.33021 | 3.05E-05 |

|            |          |          |
|------------|----------|----------|
| GNA13      | -0.14882 | 3.05E-05 |
| HSF2       | -0.16273 | 3.08E-05 |
| B3GALTL    | 0.328662 | 3.09E-05 |
| LOC1019290 | 1.029074 | 3.11E-05 |
| PLA2G15    | -0.17626 | 3.11E-05 |
| FOXRED1    | -0.19157 | 3.12E-05 |
| UXS1       | 0.218768 | 3.19E-05 |
| PRKCE      | 0.52639  | 3.20E-05 |
| SELPLG     | 0.840163 | 3.20E-05 |
| FAXC       | 0.313983 | 3.21E-05 |
| RUFY1      | -0.17677 | 3.23E-05 |
| ADPGK      | -0.16495 | 3.23E-05 |
| SIPA1L3    | 0.163217 | 3.26E-05 |
| ARL3       | 0.254939 | 3.30E-05 |
| SKI        | -0.18725 | 3.30E-05 |
| RBM28      | -0.18346 | 3.32E-05 |
| SNX11      | -0.21897 | 3.38E-05 |
| TUBG2      | 0.397177 | 3.40E-05 |
| SULT1A1    | 0.328252 | 3.41E-05 |
| PPM1M      | 0.445447 | 3.41E-05 |
| PIPSL      | -0.93653 | 3.45E-05 |
| TRAIP      | -0.22528 | 3.45E-05 |
| ABCB4      | 0.860601 | 3.46E-05 |
| CD22       | 0.873697 | 3.46E-05 |
| GTF3C5     | -0.15653 | 3.48E-05 |
| AAAS       | -0.17676 | 3.50E-05 |
| FBLN1      | 0.216967 | 3.52E-05 |
| ZSCAN2     | 0.350826 | 3.53E-05 |
| SLC52A2    | -0.21925 | 3.54E-05 |
| ERI2       | -0.20795 | 3.57E-05 |
| BATF3      | 1.155087 | 3.57E-05 |
| C18orf8    | -0.16886 | 3.57E-05 |
| NLRP1      | 1.077605 | 3.58E-05 |
| METTL2A    | -0.24502 | 3.58E-05 |
| C6orf223   | 0.933292 | 3.59E-05 |
| EPHX1      | 0.224652 | 3.63E-05 |
| C9orf89    | 0.255013 | 3.65E-05 |
| CCDC84     | -0.19492 | 3.67E-05 |
| FCHSD1     | 0.264313 | 3.73E-05 |
| ZNF391     | 0.730053 | 3.73E-05 |
| CCDC64     | 0.301989 | 3.76E-05 |
| AVL9       | -0.20414 | 3.77E-05 |
| PLEKHA4    | 0.259093 | 3.78E-05 |
| RACGAP1    | -0.13181 | 3.78E-05 |
| SPNS2      | -0.1281  | 3.82E-05 |
| GGT5       | 0.994396 | 3.82E-05 |
| CCDC42B    | 0.953503 | 3.82E-05 |

|            |          |          |
|------------|----------|----------|
| AOC1       | 0.531337 | 3.83E-05 |
| PPWD1      | -0.17126 | 3.84E-05 |
| LARS2      | -0.14828 | 3.85E-05 |
| TTC3       | 0.134804 | 3.86E-05 |
| ABCA2      | 0.295141 | 3.86E-05 |
| TP53INP2   | 0.255691 | 3.89E-05 |
| ETV5       | -0.14802 | 3.92E-05 |
| NQO1       | 0.131668 | 3.94E-05 |
| ZNF708     | -0.40257 | 3.95E-05 |
| MXD4       | -0.26482 | 3.96E-05 |
| FMO4       | 0.812697 | 3.96E-05 |
| ALYREF     | -0.13366 | 3.98E-05 |
| COG1       | -0.15734 | 4.02E-05 |
| PCLO       | 0.285105 | 4.02E-05 |
| APTR       | 0.352066 | 4.04E-05 |
| LOC1005069 | 0.437858 | 4.06E-05 |
| SET        | -0.11399 | 4.10E-05 |
| NRF1       | -0.18194 | 4.10E-05 |
| UBE2D1     | -0.1679  | 4.13E-05 |
| ZFHX4      | 0.675557 | 4.14E-05 |
| KIAA1549   | 0.252908 | 4.14E-05 |
| NKD1       | -0.12427 | 4.14E-05 |
| ACP2       | -0.17327 | 4.19E-05 |
| DNAH1      | 0.408735 | 4.20E-05 |
| PARP6      | -0.1993  | 4.21E-05 |
| MFAP3      | -0.22232 | 4.22E-05 |
| TRAF1      | 0.848385 | 4.25E-05 |
| SLC25A42   | 0.302616 | 4.27E-05 |
| ZFPM1      | -0.40252 | 4.30E-05 |
| PEX14      | -0.21348 | 4.32E-05 |
| FITM2      | 0.617586 | 4.34E-05 |
| ANAPC2     | -0.25104 | 4.37E-05 |
| MIER3      | -0.18609 | 4.39E-05 |
| ZNF513     | -0.34333 | 4.40E-05 |
| ERCC3      | -0.14231 | 4.40E-05 |
| SUB1       | -0.15974 | 4.43E-05 |
| DSG2       | 0.163783 | 4.43E-05 |
| DUS1L      | -0.14376 | 4.45E-05 |
| BZRAP1-AS1 | 0.556057 | 4.48E-05 |
| EDEM3      | -0.24431 | 4.49E-05 |
| ZNF354B    | 0.346618 | 4.49E-05 |
| SFXN1      | 0.155853 | 4.51E-05 |
| PYROXD2    | 0.431652 | 4.51E-05 |
| NARF       | -0.1854  | 4.51E-05 |
| JMY        | -0.33548 | 4.52E-05 |
| TYW1       | -0.23492 | 4.53E-05 |
| CMTM7      | 0.214196 | 4.54E-05 |

|           |          |          |
|-----------|----------|----------|
| RBP1      | 0.127595 | 4.57E-05 |
| CYB5D2    | 0.226589 | 4.58E-05 |
| SPRYD7    | 0.304861 | 4.60E-05 |
| AHSA1     | -0.13878 | 4.60E-05 |
| LOXL1-AS1 | 0.58119  | 4.62E-05 |
| DLGAP5    | -0.14474 | 4.62E-05 |
| KCNC4     | 0.795958 | 4.67E-05 |
| HINFP     | -0.23538 | 4.72E-05 |
| RBM26     | -0.15386 | 4.76E-05 |
| NUDT7     | 0.431966 | 4.77E-05 |
| GID4      | -0.52217 | 4.81E-05 |
| CDC42EP4  | 0.357736 | 4.82E-05 |
| VTI1B     | -0.17254 | 4.82E-05 |
| TOMM22    | -0.13866 | 4.83E-05 |
| TCEAL1    | 0.197948 | 4.85E-05 |
| KIF3B     | -0.1599  | 4.86E-05 |
| PDZD7     | 0.418182 | 4.90E-05 |
| PTPN23    | -0.16628 | 4.91E-05 |
| KIF14     | -0.21668 | 4.92E-05 |
| PTGES3    | -0.15144 | 4.93E-05 |
| MTHFR     | 0.201244 | 4.95E-05 |
| PLOD1     | 0.158509 | 4.95E-05 |
| ZW10      | -0.18462 | 4.97E-05 |
| AFTPH     | -0.18415 | 4.98E-05 |
| ACTR2     | -0.15093 | 4.98E-05 |
| LOC388849 | 1.002815 | 5.00E-05 |
| ANKRD20A8 | 0.663351 | 5.02E-05 |
| SPATA6L   | 0.811385 | 5.03E-05 |
| ZNF784    | -0.53514 | 5.03E-05 |
| B3GNT5    | -0.26007 | 5.05E-05 |
| MUT       | -0.1821  | 5.05E-05 |
| TNNC1     | 0.716046 | 5.06E-05 |
| FAM98A    | -0.18703 | 5.06E-05 |
| PPP6R3    | -0.12023 | 5.06E-05 |
| QPRT      | 0.237995 | 5.08E-05 |
| ANKRD9    | 0.700869 | 5.10E-05 |
| CTU1      | -0.40429 | 5.11E-05 |
| NVL       | -0.15657 | 5.11E-05 |
| CCNB2     | -0.14788 | 5.11E-05 |
| LINC01232 | 0.845153 | 5.13E-05 |
| TRPM7     | -0.16775 | 5.13E-05 |
| GOT2      | -0.12523 | 5.16E-05 |
| SULT1A2   | 1.003749 | 5.16E-05 |
| KLHL30    | 0.549769 | 5.19E-05 |
| PDCD10    | -0.17883 | 5.22E-05 |
| DENR      | -0.13475 | 5.26E-05 |
| PIR       | 0.420137 | 5.26E-05 |

|           |          |          |
|-----------|----------|----------|
| FARSB     | -0.13865 | 5.27E-05 |
| SDHA      | -0.12568 | 5.28E-05 |
| NELFCD    | -0.12002 | 5.29E-05 |
| VPS13B    | 0.196582 | 5.32E-05 |
| COL6A1    | 0.205998 | 5.32E-05 |
| SOCS6     | -0.33077 | 5.34E-05 |
| PTPN4     | 0.282156 | 5.40E-05 |
| C14orf166 | -0.14065 | 5.42E-05 |
| PMEPA1    | -0.16212 | 5.44E-05 |
| PCM1      | -0.15284 | 5.44E-05 |
| TMEM63A   | 0.324295 | 5.46E-05 |
| PHF5A     | -0.18049 | 5.46E-05 |
| HKR1      | -0.19741 | 5.48E-05 |
| CASP7     | 0.201023 | 5.55E-05 |
| EIF3M     | -0.12356 | 5.56E-05 |
| AGMAT     | 0.248797 | 5.60E-05 |
| HEBP1     | 0.23631  | 5.61E-05 |
| TMEM62    | 0.228436 | 5.72E-05 |
| TTC39C    | 0.290894 | 5.77E-05 |
| ANKDD1A   | 0.527624 | 5.78E-05 |
| SYTL2     | 0.766457 | 5.81E-05 |
| MIEF2     | -0.33084 | 5.82E-05 |
| USP28     | 0.167725 | 5.83E-05 |
| MRPL4     | -0.17738 | 5.85E-05 |
| RNF126    | -0.18891 | 5.86E-05 |
| MCM8      | -0.16893 | 5.88E-05 |
| LRCH4     | -0.14963 | 5.90E-05 |
| UCHL3     | -0.1687  | 5.90E-05 |
| MLEC      | -0.13935 | 5.92E-05 |
| SMARCAD1  | -0.15788 | 5.94E-05 |
| TUBGCP2   | -0.14744 | 5.97E-05 |
| PEF1      | -0.17359 | 5.97E-05 |
| SH3BGRL   | 0.161384 | 5.98E-05 |
| BTN2A3P   | 0.413859 | 6.03E-05 |
| MAP3K5    | 0.318499 | 6.03E-05 |
| CNTRL     | 0.168242 | 6.04E-05 |
| GYS1      | 0.24205  | 6.04E-05 |
| MFSD3     | 0.399026 | 6.09E-05 |
| ZNF681    | 0.300522 | 6.10E-05 |
| MYOM3     | 0.807291 | 6.11E-05 |
| STAM      | -0.28998 | 6.11E-05 |
| CHD4      | 0.113182 | 6.14E-05 |
| AGL       | 0.168394 | 6.14E-05 |
| MARVELD1  | 0.39828  | 6.16E-05 |
| HOXA9     | -0.3858  | 6.20E-05 |
| GK        | 0.217188 | 6.29E-05 |
| LRRK1     | 0.22238  | 6.29E-05 |

|            |          |          |
|------------|----------|----------|
| WDR3       | -0.15845 | 6.29E-05 |
| PSMB8      | 0.427643 | 6.30E-05 |
| ACTR6      | -0.25316 | 6.30E-05 |
| TRIP13     | -0.15201 | 6.32E-05 |
| SLC4A11    | 0.214066 | 6.32E-05 |
| FURIN      | -0.1907  | 6.32E-05 |
| INPP1      | 0.214061 | 6.32E-05 |
| ING5       | -0.22143 | 6.34E-05 |
| ADCY7      | 0.394308 | 6.35E-05 |
| MAP2K7     | -0.17919 | 6.36E-05 |
| ALDH3A1    | 0.311758 | 6.36E-05 |
| IL7R       | 0.464407 | 6.41E-05 |
| CYP4V2     | 0.3124   | 6.54E-05 |
| LINC00638  | 0.815855 | 6.58E-05 |
| ACTL10     | 0.596854 | 6.60E-05 |
| RNPEPL1    | -0.20563 | 6.61E-05 |
| RAB3IP     | 0.187768 | 6.62E-05 |
| LOC1005072 | 0.915117 | 6.64E-05 |
| KSR2       | 0.669168 | 6.65E-05 |
| LOC1019281 | 0.484653 | 6.65E-05 |
| HMGXB3     | -0.14913 | 6.70E-05 |
| MUC1       | 0.24505  | 6.70E-05 |
| NACC2      | -0.19606 | 6.70E-05 |
| TMEM88     | -0.80758 | 6.70E-05 |
| DTX3L      | 0.220798 | 6.74E-05 |
| XRCC6      | -0.12175 | 6.74E-05 |
| RASGEF1B   | 1.029168 | 6.75E-05 |
| OGFR       | -0.20812 | 6.79E-05 |
| JARID2     | 0.243268 | 6.80E-05 |
| STXBP3     | -0.17154 | 6.88E-05 |
| CBX7       | 0.628089 | 6.91E-05 |
| TM7SF2     | 0.254971 | 6.92E-05 |
| AKAP7      | 0.484591 | 6.92E-05 |
| CDCA7L     | 0.140014 | 6.94E-05 |
| NOTUM      | -0.17365 | 6.94E-05 |
| DUSP14     | 0.19599  | 6.94E-05 |
| GRSF1      | -0.15488 | 6.96E-05 |
| PGPEP1     | 0.314612 | 7.05E-05 |
| INTS1      | -0.14659 | 7.05E-05 |
| F8A1       | 0.609558 | 7.07E-05 |
| Orai3      | 0.30522  | 7.08E-05 |
| ADO        | -0.16719 | 7.08E-05 |
| DOT1L      | -0.22933 | 7.10E-05 |
| U2SURP     | -0.11226 | 7.12E-05 |
| KCTD11     | -0.19619 | 7.13E-05 |
| HNRNPA2B1  | -0.12035 | 7.13E-05 |
| VPS13A     | 0.192463 | 7.17E-05 |

|            |          |          |
|------------|----------|----------|
| LINC00346  | 0.76644  | 7.19E-05 |
| TUBGCP3    | -0.13573 | 7.22E-05 |
| IGFBP6     | 0.204781 | 7.25E-05 |
| FN3K       | 0.483191 | 7.27E-05 |
| TRPC4AP    | -0.13042 | 7.27E-05 |
| LOC1027244 | 0.927338 | 7.28E-05 |
| MCU        | -0.16079 | 7.32E-05 |
| EXOSC4     | -0.31549 | 7.34E-05 |
| PPIP5K2    | -0.19823 | 7.37E-05 |
| ZNF595     | -0.36942 | 7.41E-05 |
| CPA5       | 0.549494 | 7.43E-05 |
| COQ2       | -0.23543 | 7.46E-05 |
| RNF219     | -0.15307 | 7.47E-05 |
| BANP       | -0.25949 | 7.47E-05 |
| LEPR       | 0.31711  | 7.50E-05 |
| LOC1019273 | 0.726635 | 7.53E-05 |
| RASAL2     | 0.213567 | 7.57E-05 |
| FXR1       | -0.14344 | 7.57E-05 |
| LTBP4      | 0.277786 | 7.61E-05 |
| ZDBF2      | 0.272309 | 7.61E-05 |
| LRP5L      | -0.27718 | 7.62E-05 |
| FOXMI      | -0.13016 | 7.62E-05 |
| ATP10A     | 0.829188 | 7.65E-05 |
| FAM135A    | 0.288341 | 7.68E-05 |
| ARL6       | 0.349361 | 7.70E-05 |
| DHX36      | -0.13355 | 7.70E-05 |
| RPP30      | -0.18532 | 7.71E-05 |
| SNX1       | -0.14513 | 7.71E-05 |
| MF12-AS1   | 0.65558  | 7.71E-05 |
| RNF169     | -0.19178 | 7.73E-05 |
| CEP19      | 0.356859 | 7.73E-05 |
| HIPK2      | 0.24286  | 7.84E-05 |
| MLYCD      | -0.27374 | 7.86E-05 |
| HOXB7      | 0.219476 | 7.86E-05 |
| VASN       | 0.300734 | 7.95E-05 |
| EXOG       | -0.20712 | 7.96E-05 |
| THAP4      | -0.22375 | 7.97E-05 |
| IPO11      | -0.19548 | 8.02E-05 |
| KIF27      | 0.512186 | 8.12E-05 |
| ABHD3      | 0.295716 | 8.16E-05 |
| FBXO34     | -0.24065 | 8.18E-05 |
| CRIP1      | 0.473499 | 8.23E-05 |
| ZBTB39     | -0.18028 | 8.24E-05 |
| APOPT1     | -0.20363 | 8.24E-05 |
| PRRC2B     | 0.137531 | 8.28E-05 |
| IL17RB     | 0.177883 | 8.28E-05 |
| C14orf23   | -0.65253 | 8.28E-05 |

|            |          |          |
|------------|----------|----------|
| SNX19      | -0.15099 | 8.33E-05 |
| PI4K2A     | -0.17258 | 8.36E-05 |
| USH1C      | 0.211551 | 8.41E-05 |
| TRIM32     | 0.235792 | 8.43E-05 |
| SH2B2      | 0.721963 | 8.43E-05 |
| FAM214B    | -0.46913 | 8.44E-05 |
| RAPH1      | 0.158612 | 8.44E-05 |
| LOC1001307 | 0.292548 | 8.45E-05 |
| LSM8       | -0.17117 | 8.45E-05 |
| PDPR       | -0.16744 | 8.50E-05 |
| ERBB2IP    | -0.1357  | 8.51E-05 |
| LYAR       | -0.16684 | 8.55E-05 |
| OGFOD1     | -0.13926 | 8.56E-05 |
| NDUFS8     | -0.17083 | 8.62E-05 |
| OXSRI      | -0.14299 | 8.66E-05 |
| LONP1      | -0.13732 | 8.70E-05 |
| RAD50      | 0.149198 | 8.73E-05 |
| ADAMTSL4   | 0.70683  | 8.74E-05 |
| STK16      | -0.26149 | 8.74E-05 |
| RALA       | -0.14964 | 8.76E-05 |
| RAB8B      | 0.2638   | 8.77E-05 |
| BHLHA15    | 0.894185 | 8.79E-05 |
| ELFN1      | 0.730006 | 8.80E-05 |
| CRIP1      | -0.35478 | 8.86E-05 |
| NOL10      | -0.19951 | 8.87E-05 |
| PGAP1      | 0.268001 | 8.89E-05 |
| SLC25A32   | -0.15093 | 8.91E-05 |
| BTN2A1     | -0.17026 | 8.92E-05 |
| FBF1       | 0.255488 | 9.06E-05 |
| ZNF570     | -0.42282 | 9.08E-05 |
| TET2       | -0.24705 | 9.09E-05 |
| CES3       | 0.717424 | 9.09E-05 |
| ZNF503     | -0.17047 | 9.11E-05 |
| NCOA5      | -0.14456 | 9.12E-05 |
| SNCG       | 0.772513 | 9.12E-05 |
| MAPK7      | -0.29608 | 9.16E-05 |
| BCL2L13    | -0.16974 | 9.18E-05 |
| FAM3C      | 0.178328 | 9.19E-05 |
| ACRBP      | 0.760645 | 9.19E-05 |
| ZNF551     | -0.28476 | 9.23E-05 |
| BCL7A      | 0.381387 | 9.23E-05 |
| SPDL1      | -0.18715 | 9.25E-05 |
| FIBCD1     | 0.186021 | 9.27E-05 |
| CD97       | 0.127879 | 9.29E-05 |
| ALG11      | -0.46441 | 9.34E-05 |
| GIPC1      | 0.155183 | 9.34E-05 |
| SGOL2      | -0.19559 | 9.36E-05 |



|            |          |          |
|------------|----------|----------|
| APOBEC3D   | 0.815056 | 9.39E-05 |
| TMEM79     | -0.63145 | 9.40E-05 |
| CALML3-AS1 | 0.681645 | 9.41E-05 |
| RILPL2     | 0.30295  | 9.47E-05 |
| GALNT16    | 0.3999   | 9.52E-05 |
| CLIC1      | -0.13696 | 9.58E-05 |
| SYTL5      | 0.952702 | 9.66E-05 |
| EIF2AK4    | 0.204512 | 9.70E-05 |
| ZHX3       | 0.31098  | 9.72E-05 |
| REL        | -0.26324 | 9.73E-05 |
| LOC645166  | 0.483678 | 9.76E-05 |
| NAALADL1   | 1.006469 | 9.76E-05 |
| ABCC4      | 0.19678  | 9.79E-05 |
| BOD1L1     | -0.15566 | 9.88E-05 |
| ILK        | -0.13029 | 9.89E-05 |
| C7orf63    | -0.34523 | 9.92E-05 |
| LOC1005068 | 0.522401 | 9.93E-05 |
| PAX6       | -0.2682  | 9.94E-05 |
| DOPEY1     | 0.198134 | 9.94E-05 |
| LTBR       | -0.14193 | 9.96E-05 |
