# Supplementary material for: Small molecule/ML327 mediated transcriptional de-repression of E-cadherin and inhibition of epithelial-to-mesenchymal transition
Source: PubMed Central journal article supplement (PMC4673210; doi:10.18632/oncotarget.4473), 2015-06-10
Supplement: oncotarget-06-22934-s003.pdf [file oncotarget-06-22934-s003.pdf]

H520\_CHX ML327 treatment differential expressed genes from RNA seq analysis

| gene    | logFC    | FDR       |
|---------|----------|-----------|
| FILIP1L | 2.540865 | 9.74E-171 |
| LDLR    | -1.01154 | 3.19E-156 |
| NEFL    | 1.138033 | 3.48E-156 |
| DMRT2   | 1.478854 | 5.42E-146 |
| FAM46A  | 2.062942 | 6.65E-145 |
| DNAJB1  | -1.06482 | 8.39E-143 |
| TUBB4B  | -0.88529 | 1.28E-138 |
| RASL11B | -0.97512 | 3.21E-138 |
| ID2     | -0.94329 | 1.57E-136 |
| SLITRK3 | 5.882672 | 1.88E-131 |
| SALL1   | 3.07429  | 5.71E-130 |
| MED26   | -1.24626 | 2.22E-124 |
| ARID5B  | 1.698039 | 5.55E-117 |
| ID3     | -0.73718 | 6.83E-116 |
| CCNL1   | -0.77092 | 5.25E-115 |
| EPDR1   | 1.100808 | 2.05E-111 |
| BRD2    | -0.86285 | 9.89E-111 |
| EOMES   | 2.809427 | 1.16E-109 |
| MKNK2   | -0.8042  | 1.59E-107 |
| TOB1    | -1.0973  | 1.97E-107 |
| L3MBTL3 | 1.759703 | 1.86E-106 |
| SLC30A2 | 3.679663 | 1.78E-105 |
| EPHA2   | 1.434825 | 2.05E-100 |
| STMN4   | 5.492688 | 9.38E-100 |
| SIX1    | 2.143772 | 1.22E-97  |
| CLK1    | -0.90779 | 3.75E-97  |
| HERPUD1 | -0.84822 | 2.45E-96  |
| SKI     | -0.84388 | 5.00E-96  |
| LPPR4   | 1.039522 | 7.32E-96  |
| LRIF1   | 1.108387 | 1.79E-95  |
| KCTD1   | 1.744849 | 5.60E-95  |
| HSPA8   | -0.99883 | 2.09E-92  |
| EGR2    | 1.688644 | 8.17E-92  |
| TOB2    | -1.23483 | 1.04E-91  |
| FAM84A  | 2.1687   | 1.36E-91  |
| ADAMTS1 | 4.224635 | 1.42E-91  |
| PCDH20  | 4.075904 | 2.32E-91  |
| SPRY1   | 4.102849 | 1.19E-89  |
| RREB1   | 1.180407 | 5.90E-89  |
| AARD    | 1.041752 | 1.19E-87  |
| TSPYL2  | -0.88206 | 1.09E-86  |
| BCL11B  | 2.250221 | 2.12E-86  |
| CSNK1A1 | -0.76848 | 2.18E-86  |
| ZBTB2   | -0.77962 | 3.66E-86  |
| PCF11   | -1.19182 | 9.93E-86  |

|          |          |          |
|----------|----------|----------|
| AXIN2    | -0.67766 | 1.48E-83 |
| ZNF574   | -1.12482 | 4.32E-83 |
| RBM39    | -0.73615 | 5.81E-82 |
| CHD7     | 0.807364 | 1.96E-80 |
| ZNF408   | -1.06725 | 3.40E-80 |
| SOX3     | 2.725573 | 2.16E-77 |
| PCDH18   | 0.731509 | 3.30E-77 |
| SOX11    | 2.362746 | 5.33E-77 |
| NKX6-1   | 1.916292 | 1.24E-76 |
| TWIST1   | 1.333773 | 1.61E-76 |
| DKK1     | 1.643763 | 2.88E-76 |
| DDIT4L   | 2.674399 | 3.67E-76 |
| TBX2     | -0.97206 | 5.69E-76 |
| ZNF365   | 1.728648 | 1.40E-75 |
| DDIT3    | -1.22542 | 3.46E-75 |
| CCDC71L  | 1.682307 | 7.93E-74 |
| IER2     | -0.77706 | 3.69E-72 |
| SOCS2    | 2.985707 | 1.63E-71 |
| GEM      | 3.034624 | 2.19E-70 |
| PITX2    | 2.043727 | 1.93E-69 |
| NAP1L5   | 2.090456 | 2.05E-69 |
| SNAI2    | 1.700357 | 1.04E-68 |
| FAM110B  | 1.79474  | 2.71E-68 |
| SGK1     | 0.954654 | 6.25E-68 |
| PTF1A    | 1.48959  | 6.25E-68 |
| NGFR     | 2.076823 | 1.09E-67 |
| CCNT2    | -0.80101 | 1.13E-67 |
| ETV1     | 1.113112 | 3.39E-67 |
| SP5      | 0.904114 | 6.98E-67 |
| KCNJ2    | 2.110951 | 1.20E-66 |
| ENPP4    | 1.95321  | 1.85E-65 |
| RND3     | 1.178004 | 2.15E-65 |
| MXD1     | -0.85307 | 1.35E-64 |
| HCFC1    | -0.62161 | 3.50E-64 |
| PCDH10   | 3.455013 | 5.45E-64 |
| BRPF1    | -0.76964 | 1.55E-63 |
| KDM6B    | -0.99443 | 3.69E-63 |
| SNIP1    | -1.09409 | 4.07E-63 |
| SH2D3C   | 2.97123  | 7.24E-63 |
| SDE2     | -0.70721 | 1.11E-62 |
| SEMA4C   | -0.66464 | 1.98E-62 |
| PPARGC1A | 1.63101  | 2.25E-62 |
| KANSL2   | -0.78707 | 3.04E-62 |
| LRRTM1   | 1.081654 | 3.39E-62 |
| RSRP1    | -1.11998 | 5.95E-62 |
| LRAT     | 3.305124 | 7.09E-62 |
| ZIC1     | 1.517355 | 3.18E-61 |

|          |          |          |
|----------|----------|----------|
| ISL1     | 1.941984 | 3.26E-61 |
| RSRC2    | -0.70506 | 6.00E-61 |
| GATA3    | 2.975829 | 6.06E-61 |
| C1orf115 | 1.209347 | 6.36E-61 |
| ARHGAP20 | 2.246948 | 7.16E-61 |
| SHC4     | 3.011096 | 1.05E-60 |
| CHST2    | 2.495475 | 1.22E-60 |
| SLC40A1  | 4.152024 | 1.43E-60 |
| FHDC1    | 0.89754  | 1.45E-60 |
| OTX1     | 3.305815 | 5.11E-60 |
| PABPC4   | -0.60675 | 1.54E-59 |
| SERTAD3  | -1.41816 | 2.76E-59 |
| RPRM     | 3.274522 | 4.48E-59 |
| MT2A     | 1.05251  | 7.39E-59 |
| TXNIP    | -0.62264 | 7.95E-59 |
| PDE4DIP  | 0.701862 | 1.51E-58 |
| CLU      | 1.344278 | 1.72E-58 |
| SFRP4    | 4.204933 | 1.90E-58 |
| FILIP1   | 1.603346 | 2.88E-58 |
| ELOVL4   | 1.118072 | 3.31E-58 |
| SHOX2    | 1.568097 | 3.37E-58 |
| EIF5     | -0.61426 | 9.56E-58 |
| HLF      | 1.565477 | 2.44E-57 |
| EPC1     | -0.61476 | 2.69E-57 |
| ZFAND5   | -0.60321 | 6.86E-57 |
| FOXC1    | 1.031833 | 7.42E-57 |
| TRPS1    | 0.667849 | 7.66E-57 |
| SP8      | 2.447924 | 1.06E-56 |
| ID4      | -0.62198 | 1.07E-56 |
| GABRG2   | 1.49543  | 1.29E-56 |
| KDM2A    | -0.58725 | 3.29E-56 |
| SYT11    | 0.559939 | 3.29E-56 |
| RAB39B   | 1.063833 | 4.97E-56 |
| CSRP1    | 0.77878  | 7.57E-56 |
| NCEH1    | 1.040605 | 8.12E-56 |
| CRISPLD1 | 1.146728 | 8.54E-56 |
| CCND2    | 7.591514 | 8.95E-56 |
| KCNV1    | 1.617876 | 9.86E-56 |
| JRKL     | 1.430315 | 1.84E-55 |
| BAMBI    | -0.56745 | 1.92E-55 |
| CWC25    | -0.71798 | 2.68E-55 |
| CXCR4    | 0.756929 | 6.39E-55 |
| DUSP1    | -0.70967 | 1.18E-54 |
| FLRT3    | 2.756458 | 1.30E-54 |
| SUPT6H   | -0.53406 | 1.92E-54 |
| CDC42EP3 | 0.701324 | 5.74E-54 |
| SLC46A1  | 0.778309 | 2.59E-52 |

|         |          |          |
|---------|----------|----------|
| HSPA2   | 1.749873 | 3.89E-52 |
| ZNF462  | 0.936105 | 3.95E-52 |
| HES1    | 0.869297 | 1.28E-51 |
| HSPA1B  | -0.89539 | 1.63E-51 |
| DMRT3   | 2.874253 | 1.68E-51 |
| TGFBR2  | 2.351513 | 2.01E-51 |
| FGF9    | 1.682047 | 3.54E-51 |
| RAB22A  | -0.74518 | 4.24E-51 |
| PCDH1   | 2.516565 | 6.65E-51 |
| FGF19   | 0.629607 | 1.06E-50 |
| TLX3    | 0.962583 | 1.59E-50 |
| FRS2    | -0.85446 | 2.96E-50 |
| FOS     | -0.84345 | 4.37E-50 |
| MIDN    | -0.83886 | 4.90E-50 |
| IDI1    | -0.61202 | 1.23E-49 |
| CYP2U1  | 1.385996 | 1.35E-49 |
| PNRC1   | -0.93905 | 1.39E-49 |
| MXD4    | -0.81688 | 1.43E-49 |
| SIRT1   | -0.62361 | 1.71E-49 |
| FOXL2   | 2.204268 | 1.85E-49 |
| SSTR1   | 2.42374  | 2.48E-49 |
| MED9    | -1.00609 | 4.99E-49 |
| TNFAIP2 | -0.88772 | 8.93E-49 |
| PPP1R3C | 3.760324 | 4.50E-48 |
| PPP1R3B | 0.64916  | 4.54E-48 |
| HOXC5   | 1.568938 | 4.97E-48 |
| TRIM32  | 1.399039 | 8.12E-48 |
| CDKN1A  | 0.946772 | 1.63E-47 |
| EP300   | -0.57467 | 1.78E-47 |
| COQ10B  | -0.69924 | 1.81E-47 |
| RBM12B  | 0.732774 | 3.46E-47 |
| PCDH17  | 0.923061 | 3.93E-47 |
| NR2F2   | 1.670308 | 4.91E-47 |
| TMCC1   | 0.911072 | 5.62E-47 |
| ID1     | -0.67539 | 7.21E-47 |
| NAP1L3  | 1.651362 | 8.37E-47 |
| NLGN1   | 2.999712 | 9.14E-47 |
| CD274   | 3.414599 | 9.40E-47 |
| TRIM59  | 0.851399 | 2.01E-46 |
| TMEM30B | 2.522956 | 2.59E-46 |
| TMEM136 | 1.878959 | 3.09E-46 |
| MBLAC2  | 1.193324 | 3.67E-46 |
| NDNF    | 3.209608 | 4.72E-46 |
| PPRC1   | -0.59438 | 4.74E-46 |
| BRD1    | -0.56528 | 8.89E-46 |
| GATA6   | 1.398124 | 2.37E-45 |
| MSX2    | 0.823229 | 2.44E-45 |

|         |          |          |
|---------|----------|----------|
| KLF4    | -0.53703 | 3.48E-45 |
| ENC1    | 2.948032 | 3.93E-45 |
| FAM83B  | 2.724217 | 4.12E-45 |
| EMX2    | 3.224587 | 7.44E-45 |
| PLK2    | 0.949537 | 9.00E-45 |
| TPRN    | -1.11586 | 1.29E-44 |
| CRAMP1L | -0.68663 | 1.69E-44 |
| UPF1    | -0.51786 | 1.94E-44 |
| RGMB    | 0.710897 | 3.28E-44 |
| SLC35G2 | 1.464287 | 4.05E-44 |
| MSL3P1  | 0.908454 | 5.57E-44 |
| C3orf58 | 0.703191 | 7.46E-44 |
| ELAVL2  | 0.914471 | 9.43E-44 |
| CRYBG3  | 1.432092 | 9.63E-44 |
| KPNA2   | -0.52713 | 1.14E-43 |
| KCTD5   | -0.53356 | 1.36E-43 |
| AKAP12  | 0.677144 | 2.07E-43 |
| SALL2   | 0.935023 | 2.25E-43 |
| H1FO    | 1.154277 | 2.75E-43 |
| BHLHE40 | -0.56857 | 2.86E-43 |
| REXO1   | -0.7125  | 5.18E-43 |
| INO80   | -0.50841 | 5.82E-43 |
| YTHDF1  | -0.61969 | 6.40E-43 |
| SRSF2   | -0.49158 | 6.61E-43 |
| NAP1L2  | 1.484173 | 7.64E-43 |
| EXO5    | 0.664833 | 7.66E-43 |
| EVX1    | 2.401039 | 1.03E-42 |
| SETD5   | -0.54117 | 2.52E-42 |
| MEIS3P1 | 1.479384 | 2.54E-42 |
| AKAP8   | -0.57307 | 2.64E-42 |
| CTTNBP2 | 2.143028 | 3.18E-42 |
| RGS16   | 2.262851 | 3.48E-42 |
| ZRANB1  | -0.53524 | 3.48E-42 |
| HS3ST1  | 1.757649 | 3.53E-42 |
| PPP1R10 | -0.57902 | 3.71E-42 |
| CD24    | 0.592673 | 5.13E-42 |
| POLR1C  | -0.81104 | 1.11E-41 |
| LMCD1   | 1.108323 | 2.06E-41 |
| ZNF367  | -0.75489 | 2.41E-41 |
| H2AFX   | -0.53675 | 2.95E-41 |
| USP42   | -0.65555 | 3.02E-41 |
| ZNF304  | -0.7598  | 3.10E-41 |
| ZNF394  | -0.86832 | 3.42E-41 |
| C2CD4A  | 3.68225  | 3.97E-41 |
| SLITRK4 | 2.338765 | 5.42E-41 |
| EGR1    | -0.63447 | 6.23E-41 |
| DNAJA1  | -0.50692 | 7.29E-41 |

|          |          |          |
|----------|----------|----------|
| RGMA     | 2.107916 | 8.95E-41 |
| SYNM     | 1.79397  | 8.98E-41 |
| LOX      | 2.475991 | 1.25E-40 |
| TMC5     | 1.491881 | 1.49E-40 |
| HOXC13   | 2.260087 | 2.35E-40 |
| PLIN2    | 0.623967 | 2.35E-40 |
| F2RL1    | 1.546509 | 2.89E-40 |
| ARID4B   | -0.53747 | 2.91E-40 |
| OLIG2    | 1.170943 | 3.10E-40 |
| DMRTA1   | 1.596036 | 3.26E-40 |
| TMEM64   | 0.81554  | 4.07E-40 |
| SIPA1L2  | 1.257622 | 4.28E-40 |
| NRARP    | -0.55793 | 4.50E-40 |
| MAP10    | 1.802583 | 4.82E-40 |
| RBBP6    | -0.65288 | 6.59E-40 |
| CDKN2B   | 0.840805 | 6.93E-40 |
| HEXIM1   | -0.78526 | 9.51E-40 |
| KIAA1551 | 0.748774 | 1.19E-39 |
| FBXL12   | -0.58442 | 1.19E-39 |
| MPHOSPH: | -0.5689  | 1.50E-39 |
| BDNF     | 0.984513 | 1.57E-39 |
| IL10RA   | 1.316336 | 1.57E-39 |
| TPBG     | 0.82943  | 1.64E-39 |
| MT1X     | 0.595107 | 1.68E-39 |
| HEYL     | 1.128795 | 1.97E-39 |
| ZNF518B  | 0.706139 | 1.98E-39 |
| MIEF1    | -0.54148 | 2.00E-39 |
| EPHA4    | 1.003981 | 3.63E-39 |
| NXF1     | -0.84677 | 3.87E-39 |
| SRRM1    | -0.53191 | 4.20E-39 |
| SVEP1    | 2.635625 | 4.90E-39 |
| SNHG1    | -0.48728 | 5.11E-39 |
| SLCO4C1  | 2.488969 | 5.91E-39 |
| SYBU     | 2.773769 | 6.38E-39 |
| PCDH8    | 2.485626 | 7.21E-39 |
| USP44    | 2.054682 | 8.54E-39 |
| FOXE1    | 2.15077  | 8.99E-39 |
| TOP1     | -0.58067 | 1.28E-38 |
| KCNMB3   | 1.347138 | 1.58E-38 |
| HOXD13   | 2.123734 | 1.75E-38 |
| GSPT2    | 1.179882 | 2.35E-38 |
| UBALD2   | -0.81475 | 2.47E-38 |
| IP6K2    | -0.61009 | 2.73E-38 |
| PRDM8    | 5.656895 | 2.99E-38 |
| CCNT1    | -0.50546 | 3.45E-38 |
| ISL2     | 1.143591 | 3.50E-38 |
| KLF3     | 0.54008  | 5.82E-38 |

|           |          |          |
|-----------|----------|----------|
| CCNJL     | 1.791582 | 1.02E-37 |
| DNAJB9    | -1.31975 | 1.44E-37 |
| TBC1D9    | 0.935763 | 1.47E-37 |
| FAM181B   | 3.389062 | 1.49E-37 |
| ZFHX2     | 1.724591 | 1.53E-37 |
| PPP1R15B  | -0.53922 | 2.57E-37 |
| CSNK1D    | -0.47526 | 2.86E-37 |
| SEC24A    | -0.51411 | 3.32E-37 |
| IGFBP5    | 0.731116 | 3.33E-37 |
| TIMP3     | 0.887908 | 3.80E-37 |
| SFSWAP    | -0.57655 | 4.05E-37 |
| ZNF207    | -0.43408 | 4.12E-37 |
| WHAMM     | -0.60121 | 4.13E-37 |
| EIF1AD    | -0.60944 | 5.96E-37 |
| ZFHX4     | 2.408213 | 6.52E-37 |
| LOC100507 | -0.52882 | 8.62E-37 |
| ZNF184    | 0.686393 | 1.10E-36 |
| CCNF      | -0.58526 | 1.12E-36 |
| NPR3      | 0.895809 | 2.03E-36 |
| ANKRD13C  | -0.53465 | 2.52E-36 |
| GFI1      | 2.448902 | 2.71E-36 |
| SIN3A     | -0.54184 | 2.93E-36 |
| SRSF6     | -0.45351 | 2.96E-36 |
| GADD45G   | -0.55814 | 3.37E-36 |
| OLIG1     | 2.387505 | 3.45E-36 |
| SRSF7     | -0.47172 | 3.53E-36 |
| IRX4      | 4.254694 | 3.99E-36 |
| BASP1     | 1.440198 | 4.06E-36 |
| SNX18     | 0.955464 | 6.21E-36 |
| CEBPA     | 1.229257 | 6.43E-36 |
| KMT2E     | -0.57562 | 7.31E-36 |
| IRF2BPL   | 0.63607  | 7.88E-36 |
| SPATA2    | -0.84118 | 8.89E-36 |
| C17orf104 | 0.619187 | 9.29E-36 |
| MEPCE     | -0.47327 | 1.30E-35 |
| AKAP8L    | -0.62852 | 1.30E-35 |
| PRRG4     | 1.357205 | 1.30E-35 |
| HCP5      | 1.213575 | 1.35E-35 |
| NPPC      | 1.813464 | 1.56E-35 |
| TBCC      | -0.74996 | 1.56E-35 |
| SPTY2D1   | -0.53133 | 1.60E-35 |
| MT1G      | 0.900417 | 1.97E-35 |
| PRKAA2    | 0.836148 | 2.14E-35 |
| C17orf96  | 0.819217 | 2.23E-35 |
| GATA2     | -0.54687 | 3.86E-35 |
| KDM7A     | -0.47407 | 4.63E-35 |
| RIMKLA    | 1.209139 | 5.75E-35 |

|          |          |          |
|----------|----------|----------|
| SBNO1    | -0.49026 | 1.03E-34 |
| FASTKD5  | -0.59269 | 1.10E-34 |
| UBN1     | -0.47255 | 1.27E-34 |
| ZNF335   | -0.49913 | 1.38E-34 |
| RANBP10  | -0.54222 | 1.58E-34 |
| IFIT5    | 1.363106 | 1.58E-34 |
| CYR61    | 1.274289 | 2.07E-34 |
| WTAP     | -0.43094 | 2.09E-34 |
| ING5     | -0.59561 | 2.13E-34 |
| RPP25    | 1.851491 | 2.66E-34 |
| TICAM1   | 0.778343 | 2.68E-34 |
| SLC25A44 | -0.53223 | 4.71E-34 |
| CLDN1    | 3.803849 | 4.97E-34 |
| POM121C  | -0.65206 | 5.47E-34 |
| MCAM     | 1.666249 | 5.83E-34 |
| SMAD7    | -0.76978 | 1.13E-33 |
| TMEM74   | 2.818234 | 1.15E-33 |
| ARMC5    | -0.64597 | 1.16E-33 |
| CKS2     | -0.49649 | 1.29E-33 |
| PER1     | -0.77261 | 1.31E-33 |
| FGF2     | 1.048321 | 1.39E-33 |
| F3       | 1.778654 | 1.39E-33 |
| LRR8A    | -0.62893 | 1.58E-33 |
| LRR8B    | 0.803057 | 1.90E-33 |
| BBS10    | 1.025511 | 1.95E-33 |
| TRA2B    | -0.47734 | 2.31E-33 |
| WDR72    | 0.632025 | 2.42E-33 |
| TXNDC11  | -0.48352 | 4.15E-33 |
| FAM110C  | 1.870219 | 5.90E-33 |
| LIMA1    | 1.16943  | 6.62E-33 |
| DCAF12L2 | 1.114058 | 1.06E-32 |
| FNBP4    | -0.46926 | 1.35E-32 |
| INA      | 2.373355 | 1.40E-32 |
| ILDR1    | 1.286612 | 1.41E-32 |
| ZFX      | -0.55507 | 1.44E-32 |
| ZBTB21   | 0.532621 | 1.45E-32 |
| PRDM1    | 1.275926 | 1.46E-32 |
| UGDH-AS1 | 0.636902 | 2.10E-32 |
| CHST10   | 1.326646 | 2.14E-32 |
| ATF4     | -0.38119 | 2.46E-32 |
| IRF6     | 1.439498 | 2.46E-32 |
| ING1     | -0.75234 | 2.75E-32 |
| FZD8     | 1.63776  | 3.11E-32 |
| SEMA6B   | 2.211628 | 3.15E-32 |
| INHBB    | 1.035353 | 3.15E-32 |
| NEFH     | 1.709073 | 3.22E-32 |
| ST6GAL2  | 1.122952 | 3.29E-32 |



|         |          |          |
|---------|----------|----------|
| TSHZ3   | 3.058762 | 3.54E-32 |
| RBM5    | -0.4852  | 3.57E-32 |
| SSTR2   | 2.592063 | 3.93E-32 |
| ESYT3   | 1.030939 | 3.93E-32 |
| SHH     | -0.60656 | 5.00E-32 |
| ZCCHC3  | -0.69254 | 5.12E-32 |
| B3GALT2 | 1.413252 | 5.12E-32 |
| MCL1    | -0.41332 | 6.84E-32 |
| CHD2    | -0.51549 | 7.12E-32 |
| CLP1    | -0.91409 | 7.52E-32 |
| ADRA2A  | 1.664069 | 8.86E-32 |
| ZNF263  | -0.48564 | 1.02E-31 |
| ITPRIP  | 2.168336 | 1.19E-31 |
| RAPH1   | 0.736675 | 2.18E-31 |
| CDH1    | 1.06876  | 3.11E-31 |
| PIAS4   | -0.67401 | 3.87E-31 |
| TRA2A   | -0.4639  | 4.25E-31 |
| EIF5A2  | 0.635316 | 4.58E-31 |
| MFAP3L  | 2.752099 | 5.63E-31 |
| SSFA2   | 0.518122 | 5.79E-31 |
| KCTD12  | 1.335213 | 6.30E-31 |
| NEUROD1 | 8.407547 | 7.47E-31 |
| MIR22HG | -1.44139 | 7.70E-31 |
| THBD    | 3.182276 | 8.11E-31 |
| ZNF598  | -0.4544  | 8.65E-31 |
| CCDC174 | -0.57136 | 9.50E-31 |
| BHLHE41 | 4.682314 | 9.50E-31 |
| SMEK1   | -0.51747 | 1.08E-30 |
| TMEM169 | 1.798065 | 1.09E-30 |
| HEY2    | 2.484486 | 1.26E-30 |
| C5orf30 | 0.582557 | 1.53E-30 |
| ZC3H12C | 0.88847  | 1.58E-30 |
| ZNF608  | 0.56884  | 1.60E-30 |
| MED13   | -0.44707 | 1.60E-30 |
| CDC34   | -0.44203 | 1.72E-30 |
| PRPF38B | -0.46486 | 1.75E-30 |
| NR2E1   | 4.000747 | 2.39E-30 |
| RNF25   | -0.5719  | 2.55E-30 |
| TNFSF10 | 1.326268 | 2.60E-30 |
| TMEM151 | 2.577732 | 2.67E-30 |
| ABCB1   | 3.096483 | 2.69E-30 |
| PLS1    | 0.631456 | 2.81E-30 |
| RNF10   | -0.4705  | 2.98E-30 |
| ARL4D   | 1.371716 | 3.25E-30 |
| SEC16A  | -0.44842 | 3.32E-30 |
| RLF     | -0.4621  | 3.38E-30 |
| SKIDA1  | 3.459868 | 3.86E-30 |

|          |          |          |
|----------|----------|----------|
| C16orf70 | -0.62728 | 4.38E-30 |
| RBM22    | -0.43063 | 4.50E-30 |
| ZNF92    | -0.67972 | 6.10E-30 |
| SNCAIP   | 2.290921 | 6.61E-30 |
| ZNF689   | -0.47466 | 6.84E-30 |
| POLR2A   | -0.59265 | 7.10E-30 |
| YTHDF3   | -0.43482 | 7.28E-30 |
| RNF144B  | 1.169941 | 7.36E-30 |
| TAGLN3   | 2.084945 | 7.46E-30 |
| SAFB2    | -0.50842 | 8.31E-30 |
| PYGO1    | 0.728606 | 9.18E-30 |
| TGFBR3   | 1.290214 | 1.05E-29 |
| SIK1     | -0.68735 | 1.09E-29 |
| ARL6IP1  | -0.46209 | 1.09E-29 |
| NAT8L    | 0.688854 | 1.64E-29 |
| FANCF    | 1.207011 | 1.73E-29 |
| AP1G1    | -0.45951 | 1.90E-29 |
| SLC2A1   | -0.41673 | 2.46E-29 |
| MAB21L3  | 0.834226 | 2.83E-29 |
| FZD10    | 2.600437 | 2.97E-29 |
| SMNDC1   | -0.55204 | 2.99E-29 |
| SON      | -0.44876 | 3.02E-29 |
| TMCC2    | 2.772739 | 3.48E-29 |
| RASD1    | -0.89896 | 3.69E-29 |
| PHLDA1   | 0.390562 | 3.71E-29 |
| FOXQ1    | -0.48167 | 3.86E-29 |
| HAS3     | 0.534272 | 5.18E-29 |
| ADRM1    | -0.46202 | 5.57E-29 |
| EIF2AK3  | -0.53975 | 5.63E-29 |
| SRSF3    | -0.40788 | 5.91E-29 |
| TERF2IP  | -0.44096 | 7.35E-29 |
| GNL3     | -0.4332  | 7.38E-29 |
| CDK12    | -0.42123 | 7.39E-29 |
| CALCB    | 1.88643  | 7.73E-29 |
| ZBTB11   | -0.55947 | 7.75E-29 |
| TMEM55B  | -0.55775 | 8.34E-29 |
| CCNA1    | 0.935622 | 9.32E-29 |
| BRAP     | -0.48038 | 1.06E-28 |
| DOHH     | -0.48569 | 1.11E-28 |
| TMEM200  | 2.714369 | 1.62E-28 |
| IGSF11   | 2.096674 | 1.63E-28 |
| KCND2    | 1.135249 | 1.97E-28 |
| SETD1B   | -0.87786 | 2.52E-28 |
| SRRT     | -0.42243 | 2.85E-28 |
| ZNF691   | 0.806674 | 3.32E-28 |
| PRRC2A   | -0.37849 | 3.70E-28 |
| ZKSCAN1  | -0.52925 | 3.78E-28 |

|          |          |          |
|----------|----------|----------|
| RBM25    | -0.45139 | 4.29E-28 |
| IRF1     | 0.769386 | 5.00E-28 |
| P2RY1    | 2.384011 | 5.29E-28 |
| ITPRIPL2 | 1.047996 | 6.61E-28 |
| SH3BGRL2 | 0.646668 | 7.49E-28 |
| DSG4     | 2.503046 | 7.63E-28 |
| RNF139   | -0.48922 | 8.77E-28 |
| DAPK3    | -0.51764 | 9.21E-28 |
| KMT2B    | -0.57549 | 9.61E-28 |
| LRR8C    | 0.846946 | 1.00E-27 |
| SH3GL2   | 0.991511 | 1.10E-27 |
| CDC25A   | -0.59486 | 1.15E-27 |
| KCNQ1OT1 | 0.678561 | 1.29E-27 |
| RGL1     | 2.626716 | 1.38E-27 |
| WEE1     | -0.83659 | 1.49E-27 |
| MICB     | 0.622751 | 1.59E-27 |
| MEX3C    | -0.49612 | 1.63E-27 |
| MLLT3    | 1.115844 | 1.63E-27 |
| BRF2     | -0.51911 | 2.10E-27 |
| ENPP1    | 1.110712 | 2.16E-27 |
| LARP4B   | -0.43442 | 2.77E-27 |
| DYRK1A   | -0.49307 | 2.80E-27 |
| HABP2    | 0.942594 | 2.97E-27 |
| HIRA     | -0.54059 | 4.29E-27 |
| RRN3     | -0.43587 | 6.36E-27 |
| GLIDR    | 0.732103 | 7.19E-27 |
| CBX4     | -0.43681 | 7.51E-27 |
| NOTCH2   | 0.568306 | 7.54E-27 |
| RSPRY1   | -0.52735 | 1.10E-26 |
| MED1     | -0.4009  | 1.12E-26 |
| ZSCAN12  | 0.964783 | 1.26E-26 |
| PER2     | -0.49843 | 1.36E-26 |
| SOX1     | 1.462471 | 1.36E-26 |
| PABPC5   | 2.098634 | 1.42E-26 |
| TMRSS2   | 1.690758 | 1.51E-26 |
| LFNG     | -0.45511 | 1.63E-26 |
| SCAF4    | -0.43989 | 1.79E-26 |
| FBXO31   | -0.4724  | 1.84E-26 |
| HNRNPA0  | -0.38753 | 1.98E-26 |
| SEPP1    | 1.333042 | 2.01E-26 |
| FOXF1    | 1.969971 | 2.03E-26 |
| PABPC4L  | 4.054332 | 2.55E-26 |
| TMEM170F | 0.981426 | 2.74E-26 |
| RABGEF1  | -0.5899  | 2.76E-26 |
| CDCA8    | -0.40256 | 2.91E-26 |
| DLX1     | 0.655997 | 3.00E-26 |
| PRICKLE1 | 2.166492 | 3.07E-26 |

|          |          |          |
|----------|----------|----------|
| TMEM246  | 1.665634 | 3.13E-26 |
| MB21D2   | 1.106772 | 3.15E-26 |
| TACC2    | 0.574686 | 3.52E-26 |
| WDR74    | -0.44217 | 3.64E-26 |
| C1GALT1  | 0.58008  | 3.89E-26 |
| MANSC1   | 0.735726 | 4.09E-26 |
| RASEF    | 0.555688 | 4.18E-26 |
| PRDM13   | 1.168746 | 4.35E-26 |
| UBC      | -0.55171 | 4.70E-26 |
| RBM3     | -0.41726 | 4.82E-26 |
| FOXN2    | 0.699156 | 5.20E-26 |
| NFX1     | -0.42502 | 5.64E-26 |
| NOTCH1   | -0.49952 | 5.99E-26 |
| CHD9     | 0.540207 | 6.13E-26 |
| CYP1A1   | 0.719283 | 6.19E-26 |
| WDR89    | 0.751961 | 6.72E-26 |
| ZFP42    | 2.594575 | 8.17E-26 |
| CCNG2    | -1.14168 | 8.66E-26 |
| STC1     | 2.683775 | 8.96E-26 |
| INSIG1   | -0.44006 | 8.97E-26 |
| IFRD1    | -0.45185 | 8.99E-26 |
| TUSC2    | -0.62946 | 9.84E-26 |
| PHKG2    | -0.47325 | 1.12E-25 |
| PAX9     | 3.318657 | 1.15E-25 |
| NOP16    | -0.45014 | 1.16E-25 |
| LCA5     | 1.858587 | 1.24E-25 |
| PHF23    | -0.76579 | 1.24E-25 |
| ABHD10   | 0.677033 | 1.29E-25 |
| RUNX3    | 1.272043 | 1.39E-25 |
| NEUROG2  | 3.331833 | 1.68E-25 |
| AMMECR1  | -0.46327 | 1.80E-25 |
| PIP5K1A  | -0.41913 | 1.83E-25 |
| CDR2     | -0.3708  | 2.21E-25 |
| NKX2-8   | 2.933111 | 2.52E-25 |
| CACTIN   | -0.42343 | 2.64E-25 |
| FBRS     | -0.52526 | 2.70E-25 |
| HSPA5    | -0.39504 | 2.94E-25 |
| HAS2     | 1.81623  | 2.95E-25 |
| EIF1     | -0.41092 | 3.10E-25 |
| FJX1     | 1.326872 | 3.19E-25 |
| SPP1     | 0.454777 | 3.60E-25 |
| KIAA0907 | -0.45814 | 3.69E-25 |
| ATMIN    | -0.45543 | 3.75E-25 |
| BMP3     | 1.973366 | 3.75E-25 |
| YY1      | -0.44894 | 3.75E-25 |
| CDKN1B   | -0.50828 | 3.83E-25 |
| EGLN3    | 2.149229 | 3.83E-25 |

|          |          |          |
|----------|----------|----------|
| RASSF5   | 2.606424 | 3.83E-25 |
| NREP     | 0.658428 | 3.96E-25 |
| GABPB1   | -0.48622 | 4.08E-25 |
| ZC3H7A   | -0.40091 | 4.08E-25 |
| KL       | 1.119942 | 4.71E-25 |
| POM121   | -0.49199 | 5.04E-25 |
| ZNF879   | 1.482855 | 5.11E-25 |
| PPM1D    | -0.48343 | 7.09E-25 |
| ATOH1    | 3.522718 | 8.10E-25 |
| AKIRIN1  | -0.36305 | 8.82E-25 |
| ZBED8    | 1.546224 | 9.51E-25 |
| MAB21L1  | 2.587285 | 1.00E-24 |
| NRIP3    | 1.016192 | 1.09E-24 |
| COL12A1  | 3.042257 | 1.13E-24 |
| C3orf80  | 1.960923 | 1.15E-24 |
| THUMPD1  | -0.40309 | 1.16E-24 |
| TBC1D2B  | 0.730475 | 1.26E-24 |
| YY1AP1   | -0.42914 | 1.28E-24 |
| TIPARP   | -0.40515 | 1.30E-24 |
| GPATCH3  | -0.63553 | 1.31E-24 |
| ZIC5     | 1.615106 | 1.34E-24 |
| MT1M     | 1.423072 | 1.34E-24 |
| NTF3     | 1.744178 | 1.35E-24 |
| ZNF287   | 1.191469 | 1.40E-24 |
| RAB5A    | -0.40986 | 1.44E-24 |
| NOV      | 2.832183 | 1.50E-24 |
| CLK3     | -0.44528 | 1.56E-24 |
| CDCP1    | 0.784975 | 1.57E-24 |
| NR2F1    | 3.345564 | 1.62E-24 |
| HAND1    | 1.364032 | 1.72E-24 |
| TTBK1    | 2.049219 | 1.81E-24 |
| SRSF4    | -0.38304 | 1.82E-24 |
| RASSF8   | 0.881483 | 2.06E-24 |
| RC3H1    | -0.57856 | 2.19E-24 |
| HIVEP2   | 0.926545 | 2.41E-24 |
| ZNF710   | 0.470344 | 2.52E-24 |
| KRT18    | -0.50323 | 2.52E-24 |
| INTS6    | -0.44598 | 2.62E-24 |
| ARHGEF38 | 1.418813 | 2.83E-24 |
| KMT2D    | -0.51142 | 2.97E-24 |
| FOXD3    | 2.454609 | 3.05E-24 |
| ASB6     | -0.52958 | 3.14E-24 |
| NOM1     | -0.43045 | 3.22E-24 |
| HOXA5    | 1.388851 | 3.79E-24 |
| ZFP82    | 0.890826 | 3.82E-24 |
| TUFT1    | -0.39366 | 4.27E-24 |
| ARHGEF26 | 0.626049 | 4.57E-24 |

|           |          |          |
|-----------|----------|----------|
| NES       | 0.624575 | 5.03E-24 |
| TSLP      | 3.696634 | 5.03E-24 |
| RFWD3     | -0.4124  | 5.52E-24 |
| SHISA2    | 0.902556 | 5.53E-24 |
| TIAL1     | -0.44602 | 5.84E-24 |
| CDCA5     | -0.38275 | 6.01E-24 |
| SOX4      | 0.385169 | 6.07E-24 |
| EIF4G2    | -0.364   | 6.84E-24 |
| ZBTB43    | -0.66924 | 6.87E-24 |
| KIF23     | -0.37113 | 7.89E-24 |
| TNFRSF11B | 0.754811 | 8.28E-24 |
| PAF1      | -0.38731 | 9.24E-24 |
| RBM24     | 4.004355 | 1.05E-23 |
| THEM6     | 1.177721 | 1.08E-23 |
| DSC3      | 1.231895 | 1.11E-23 |
| RFX7      | 0.521848 | 1.29E-23 |
| TIFA      | 1.162858 | 1.31E-23 |
| PTGS2     | 4.433682 | 1.36E-23 |
| SLU7      | -0.45195 | 1.47E-23 |
| BCLAF1    | -0.37001 | 1.54E-23 |
| PPAP2B    | 1.671352 | 1.55E-23 |
| RASSF10   | 4.399536 | 1.72E-23 |
| JMJD6     | -0.4584  | 1.73E-23 |
| FBXO28    | -0.41382 | 1.74E-23 |
| UBFD1     | -0.37951 | 1.87E-23 |
| SLFN11    | 1.429648 | 1.93E-23 |
| NDP       | 1.844214 | 2.19E-23 |
| ARIH1     | -0.36786 | 2.25E-23 |
| CXXC4     | 2.85171  | 2.31E-23 |
| LPAR3     | 3.066521 | 2.31E-23 |
| ZCCHC12   | 2.427895 | 2.32E-23 |
| DNAJC6    | 0.569868 | 2.56E-23 |
| SUPT5H    | -0.38233 | 2.94E-23 |
| JAG1      | 0.456391 | 3.04E-23 |
| SMG8      | -0.49318 | 3.17E-23 |
| PHF12     | -0.54164 | 3.22E-23 |
| NPLOC4    | -0.37615 | 3.39E-23 |
| GOLGA3    | -0.46681 | 3.59E-23 |
| FAF2      | -0.34951 | 3.65E-23 |
| SBDS      | -0.42656 | 3.92E-23 |
| DDX6      | -0.41447 | 3.95E-23 |
| ZFP69     | 0.823888 | 4.39E-23 |
| TUBB6     | 0.549045 | 4.46E-23 |
| BEND3     | 0.915404 | 4.58E-23 |
| FAM91A1   | -0.43269 | 4.69E-23 |
| SYVN1     | -0.61232 | 4.77E-23 |
| ATF7IP    | 0.44277  | 5.22E-23 |

|          |          |          |
|----------|----------|----------|
| WDR82    | -0.41629 | 5.25E-23 |
| FGF13    | 0.670685 | 5.29E-23 |
| CDK5R2   | 4.240531 | 5.54E-23 |
| RBMS1    | 1.319307 | 5.92E-23 |
| CD2BP2   | -0.38913 | 6.37E-23 |
| PPP2CA   | -0.36274 | 6.51E-23 |
| KIAA0040 | 1.122573 | 7.68E-23 |
| LHX2     | 2.214964 | 8.35E-23 |
| SUCO     | -0.37789 | 9.07E-23 |
| DSP      | -0.39276 | 9.20E-23 |
| S1PR3    | 1.371842 | 9.48E-23 |
| SF3B1    | -0.33373 | 1.04E-22 |
| FZR1     | -0.49824 | 1.06E-22 |
| PRCC     | -0.42658 | 1.20E-22 |
| DIDO1    | -0.54752 | 1.25E-22 |
| HOXA10   | 1.079095 | 1.38E-22 |
| KIAA1462 | 1.897275 | 1.41E-22 |
| EIF4A3   | -0.36385 | 1.81E-22 |
| ZNF830   | -0.52667 | 1.88E-22 |
| PCDH9    | 1.320858 | 1.97E-22 |
| SETD1A   | -0.41697 | 2.28E-22 |
| EN1      | 2.307256 | 2.29E-22 |
| RGAG4    | 1.334601 | 2.34E-22 |
| RAG1     | 2.319772 | 2.56E-22 |
| CRY2     | -0.58079 | 2.59E-22 |
| CLIC6    | 0.695783 | 2.60E-22 |
| MFHAS1   | 0.557794 | 2.71E-22 |
| ADAM19   | 0.544648 | 2.93E-22 |
| DEPDC7   | 0.533873 | 2.93E-22 |
| ARRDC3   | 0.562393 | 3.14E-22 |
| LRRC10B  | 0.936722 | 3.20E-22 |
| SART3    | -0.35922 | 3.95E-22 |
| ZNF786   | 0.777844 | 3.95E-22 |
| ZNF607   | 0.796194 | 4.12E-22 |
| TRIB2    | 0.444506 | 4.71E-22 |
| NR3C1    | 0.473984 | 4.88E-22 |
| USP36    | -0.415   | 4.95E-22 |
| T        | 2.299268 | 5.09E-22 |
| EAF1     | -0.46753 | 5.17E-22 |
| PPP1R3D  | 1.174668 | 5.45E-22 |
| SLC30A1  | -0.36152 | 5.66E-22 |
| PPP1R9B  | 0.628289 | 6.04E-22 |
| GTF2B    | -0.53108 | 6.08E-22 |
| TMEM55A  | 0.894816 | 6.22E-22 |
| FEM1C    | -0.43473 | 6.32E-22 |
| KAT6B    | -0.43145 | 6.55E-22 |
| GLUD2    | 1.367231 | 6.99E-22 |

|           |          |          |
|-----------|----------|----------|
| UBE2J2    | -0.39576 | 7.88E-22 |
| TSPYL5    | 0.699871 | 7.91E-22 |
| ZBTB38    | 0.407538 | 8.37E-22 |
| SRF       | -0.43276 | 8.65E-22 |
| SENP2     | -0.34999 | 9.69E-22 |
| MORC3     | -0.45054 | 9.69E-22 |
| PDPK1     | -0.39633 | 1.01E-21 |
| MET       | 0.905015 | 1.11E-21 |
| KBTBD7    | 1.04232  | 1.11E-21 |
| CTB-174D1 | 1.098106 | 1.12E-21 |
| LRP12     | 0.88556  | 1.14E-21 |
| USP38     | -0.43069 | 1.17E-21 |
| EFR3A     | 0.553295 | 1.19E-21 |
| FEZF1     | 2.850272 | 1.26E-21 |
| UBE2Z     | -0.38491 | 1.33E-21 |
| NACC1     | -0.40538 | 1.34E-21 |
| KCNN2     | 1.851398 | 1.34E-21 |
| VGf       | 2.312446 | 1.40E-21 |
| CCDC82    | 0.437917 | 1.49E-21 |
| GNB4      | 1.092505 | 1.61E-21 |
| PLEKHF2   | 0.761512 | 1.73E-21 |
| WT1       | 0.947217 | 1.82E-21 |
| SERTAD1   | -0.59752 | 1.90E-21 |
| INPP5J    | 1.131376 | 1.94E-21 |
| VCP       | -0.34708 | 1.95E-21 |
| AMOTL1    | 0.974827 | 1.98E-21 |
| IFNLR1    | 0.944735 | 1.98E-21 |
| ZDBF2     | 0.704008 | 2.01E-21 |
| KRT20     | 1.368134 | 2.24E-21 |
| ZDHHC7    | -0.49799 | 2.36E-21 |
| PAPOLG    | -0.44899 | 2.37E-21 |
| TUBA1C    | -0.36359 | 2.51E-21 |
| PLAGL2    | -0.56167 | 2.64E-21 |
| ZKSCAN3   | 0.848677 | 2.77E-21 |
| KLF9      | -0.57169 | 2.99E-21 |
| GATM      | 1.075279 | 3.02E-21 |
| PCSK5     | 0.649212 | 3.09E-21 |
| SUPV3L1   | -0.38183 | 3.21E-21 |
| C11orf96  | 1.718387 | 3.30E-21 |
| JUNB      | -0.62709 | 3.52E-21 |
| KAT6A     | -0.39008 | 3.75E-21 |
| FHL2      | 0.950526 | 4.19E-21 |
| BUD13     | -0.51366 | 5.17E-21 |
| FAXC      | 0.560448 | 5.70E-21 |
| ZNF7      | -0.55877 | 5.78E-21 |
| SPSB4     | 1.518271 | 6.22E-21 |
| DDX3X     | -0.35879 | 6.24E-21 |



|           |          |          |
|-----------|----------|----------|
| LOC440173 | 1.527644 | 6.65E-21 |
| ATG14     | -0.68408 | 6.68E-21 |
| GCC1      | -0.49279 | 6.77E-21 |
| HMX2      | 2.459836 | 6.91E-21 |
| FBXO38    | -0.41098 | 6.91E-21 |
| TRPC1     | 1.876945 | 6.91E-21 |
| VCP1P1    | -0.46742 | 7.13E-21 |
| CHSY1     | 0.512389 | 7.29E-21 |
| HIAT1     | -0.46519 | 8.65E-21 |
| KIAA1024  | 0.654062 | 8.68E-21 |
| PPF1A1    | -0.39001 | 8.87E-21 |
| CIC       | -0.5903  | 9.21E-21 |
| RSPO2     | 4.043929 | 9.21E-21 |
| ACVR1B    | 0.691164 | 9.29E-21 |
| PCYT1B    | 0.802353 | 9.35E-21 |
| NRBP1     | -0.38051 | 9.75E-21 |
| GRHL1     | 1.095302 | 1.07E-20 |
| RBM15     | -0.457   | 1.07E-20 |
| ASB13     | 0.567432 | 1.09E-20 |
| PAQR9     | 3.259214 | 1.12E-20 |
| LOC730101 | 0.550442 | 1.16E-20 |
| FNIP1     | -0.45875 | 1.19E-20 |
| APLN      | 2.075649 | 1.27E-20 |
| SIX2      | 1.320876 | 1.29E-20 |
| SLC12A7   | -0.47063 | 1.30E-20 |
| SYN1      | 2.475954 | 1.31E-20 |
| MYCL      | 0.646953 | 1.35E-20 |
| RPRD1B    | -0.36079 | 1.52E-20 |
| CCDC94    | -0.51981 | 1.59E-20 |
| KLHL15    | -0.6144  | 1.62E-20 |
| BDP1      | -0.41886 | 1.67E-20 |
| PSMD11    | -0.31393 | 1.77E-20 |
| OCLN      | 0.93076  | 1.79E-20 |
| ZNF827    | 0.571043 | 1.95E-20 |
| MEF2D     | -0.5383  | 2.17E-20 |
| ZIC2      | 1.288462 | 2.22E-20 |
| C6orf62   | -0.58472 | 2.37E-20 |
| DNTTIP2   | -0.38166 | 2.50E-20 |
| CRK       | -0.36236 | 2.57E-20 |
| DACT1     | 0.683508 | 2.94E-20 |
| ETF1      | -0.35757 | 3.07E-20 |
| DEDD2     | -0.41001 | 3.23E-20 |
| MTF1      | -0.45537 | 3.30E-20 |
| DYRK1B    | -0.78144 | 3.31E-20 |
| KIT       | 1.170079 | 3.33E-20 |
| MARK1     | 0.587575 | 3.39E-20 |
| TRIM2     | 0.74687  | 3.52E-20 |

|           |          |          |
|-----------|----------|----------|
| LSM12     | -0.3583  | 3.63E-20 |
| CNOT1     | -0.34916 | 3.72E-20 |
| ZNF329    | 1.528136 | 3.85E-20 |
| INCENP    | -0.35259 | 3.95E-20 |
| OSBP      | -0.34383 | 3.98E-20 |
| TRAPPC10  | -0.49389 | 4.06E-20 |
| RASGRP1   | 1.336503 | 4.31E-20 |
| CDCA2     | -0.415   | 4.32E-20 |
| TMEM51    | 1.115036 | 4.74E-20 |
| AKT1S1    | -0.44698 | 4.88E-20 |
| F11R      | -0.34069 | 5.08E-20 |
| KIAA0895  | 0.763098 | 5.15E-20 |
| KLF10     | -0.42166 | 5.16E-20 |
| GAK       | -0.33208 | 5.25E-20 |
| MGAT1     | -0.42526 | 5.26E-20 |
| C10orf118 | -0.44551 | 5.26E-20 |
| FZD2      | 1.352194 | 5.46E-20 |
| TOPORS    | -0.38257 | 5.67E-20 |
| LIN54     | -0.48288 | 5.68E-20 |
| HAND2     | 0.934432 | 5.73E-20 |
| GCNT1     | 0.528541 | 6.00E-20 |
| FASN      | -0.36783 | 6.12E-20 |
| SRSF11    | -0.34783 | 6.26E-20 |
| PHRF1     | -0.37579 | 6.95E-20 |
| NECAP1    | -0.38329 | 7.00E-20 |
| EAPP      | -0.49098 | 7.31E-20 |
| LIPG      | 1.011238 | 7.40E-20 |
| MEX3B     | 0.807495 | 8.46E-20 |
| YRDC      | -0.53299 | 8.47E-20 |
| FAM193A   | -0.46365 | 8.54E-20 |
| FYTTD1    | 0.389294 | 8.73E-20 |
| STK40     | -0.42337 | 8.92E-20 |
| LATS1     | -0.39676 | 9.10E-20 |
| HUNK      | 0.406644 | 9.44E-20 |
| KIF5B     | -0.39929 | 9.52E-20 |
| NUP50     | -0.45161 | 1.01E-19 |
| HOXA11    | 2.180096 | 1.09E-19 |
| ERF       | -0.57725 | 1.16E-19 |
| MT1A      | 1.924744 | 1.16E-19 |
| CBX6      | 0.636625 | 1.20E-19 |
| AASS      | 0.751731 | 1.20E-19 |
| RHOU      | 1.647859 | 1.26E-19 |
| B4GALT5   | 0.452114 | 1.31E-19 |
| ZNF331    | 0.57824  | 1.32E-19 |
| TEX19     | 1.758525 | 1.34E-19 |
| NRXN2     | 1.88569  | 1.34E-19 |
| EMB       | 0.656161 | 1.35E-19 |

|           |          |          |
|-----------|----------|----------|
| AKAP7     | 1.082353 | 1.43E-19 |
| MT1F      | 0.725695 | 1.47E-19 |
| POLD3     | -0.40027 | 1.47E-19 |
| TFAP2C    | 2.880144 | 1.53E-19 |
| NCOA4     | -0.36709 | 1.54E-19 |
| HOXC6     | 1.827977 | 1.54E-19 |
| ZNF202    | -0.50088 | 1.58E-19 |
| CDH6      | 2.517496 | 1.99E-19 |
| CHERP     | -0.38362 | 2.19E-19 |
| DDX5      | -0.49428 | 2.20E-19 |
| AMD1      | -0.377   | 2.31E-19 |
| BZW1      | -0.33087 | 2.34E-19 |
| BMP6      | 0.920133 | 2.43E-19 |
| ZFP62     | 0.610328 | 2.46E-19 |
| RIOK3     | -0.40409 | 2.57E-19 |
| DUSP16    | -0.34464 | 2.64E-19 |
| ELF2      | -0.47039 | 2.65E-19 |
| SDC2      | 2.00983  | 2.79E-19 |
| MAP1LC3B  | -0.4014  | 2.95E-19 |
| C1orf52   | -0.5045  | 2.96E-19 |
| MARK3     | -0.37777 | 2.96E-19 |
| ADAMTS15  | 1.585341 | 3.18E-19 |
| BMP2      | 2.390189 | 3.20E-19 |
| TP53INP2  | -0.64476 | 3.20E-19 |
| FOXP1     | 0.742497 | 3.23E-19 |
| TMCC3     | 1.846513 | 3.25E-19 |
| SOBP      | 2.112775 | 3.29E-19 |
| ZBTB5     | -0.3975  | 3.30E-19 |
| SHF       | 0.692112 | 3.31E-19 |
| ARID1A    | -0.36838 | 3.46E-19 |
| TRIM11    | -0.39101 | 3.50E-19 |
| ARID4A    | -0.45114 | 3.51E-19 |
| DNAJC2    | -0.36529 | 3.51E-19 |
| UGT8      | 1.094293 | 3.56E-19 |
| OXSM      | 1.102168 | 3.64E-19 |
| PHYHIPL   | 2.243422 | 3.66E-19 |
| SLITRK5   | 3.143838 | 3.80E-19 |
| TAOK2     | -0.44854 | 3.86E-19 |
| SCAMP5    | 0.901223 | 4.07E-19 |
| PPP2R2D   | -0.48408 | 4.07E-19 |
| POLDIP3   | -0.34282 | 4.26E-19 |
| ABCF3     | -0.34923 | 4.34E-19 |
| SYNRG     | -0.37863 | 4.45E-19 |
| LOC642366 | 1.738897 | 4.47E-19 |
| TLR6      | 2.146125 | 4.60E-19 |
| ZNF282    | -0.42182 | 4.97E-19 |
| MTA2      | -0.31426 | 5.41E-19 |

|          |          |          |
|----------|----------|----------|
| ZSWIM5   | 0.520522 | 5.44E-19 |
| KCTD21   | 0.77788  | 5.85E-19 |
| KBTBD6   | 0.531449 | 6.00E-19 |
| CCDC137  | -0.43723 | 6.09E-19 |
| CEP120   | 0.503636 | 6.37E-19 |
| PLOD2    | 0.403818 | 6.68E-19 |
| PSMD12   | -0.37204 | 6.68E-19 |
| MAD2L1BP | -0.47451 | 6.72E-19 |
| ZC3H3    | -0.48116 | 6.87E-19 |
| PALLD    | 0.410257 | 7.90E-19 |
| SRSF5    | -0.4469  | 8.45E-19 |
| TTF1     | -0.46779 | 8.77E-19 |
| SERPINB9 | 1.777744 | 8.95E-19 |
| TBP      | -0.35978 | 9.66E-19 |
| INSM1    | 0.58938  | 9.87E-19 |
| MAEA     | -0.35559 | 1.10E-18 |
| FAM83D   | -0.35272 | 1.18E-18 |
| CRMP1    | 1.352736 | 1.19E-18 |
| E2F3     | -0.37609 | 1.20E-18 |
| SMEK2    | -0.36243 | 1.24E-18 |
| KIAA0232 | -0.65762 | 1.41E-18 |
| B4GALT6  | 0.83806  | 1.52E-18 |
| LURAP1L  | 3.400128 | 1.63E-18 |
| HIC2     | -0.69642 | 1.69E-18 |
| MNT      | -0.59659 | 1.73E-18 |
| TMEM9B   | -0.66672 | 1.88E-18 |
| SFMBT2   | 1.590717 | 1.91E-18 |
| TPRA1    | -0.39785 | 1.94E-18 |
| VPRBP    | -0.36077 | 2.03E-18 |
| YTHDF2   | -0.3433  | 2.13E-18 |
| NOD2     | 1.165691 | 2.16E-18 |
| UBOX5    | -0.80743 | 2.16E-18 |
| PCNXL3   | -0.39189 | 2.27E-18 |
| IL1R1    | 1.062311 | 2.31E-18 |
| TSC22D1  | -0.34614 | 2.33E-18 |
| L3MBTL2  | -0.40188 | 2.37E-18 |
| MT1H     | 2.319801 | 2.62E-18 |
| PTPRE    | -0.40569 | 2.64E-18 |
| USP8     | -0.33632 | 2.66E-18 |
| IRS2     | 0.635375 | 2.68E-18 |
| RRP12    | -0.36135 | 2.68E-18 |
| GSE1     | -0.39146 | 2.69E-18 |
| RIN2     | 1.680828 | 2.70E-18 |
| HCCS     | -0.38419 | 2.78E-18 |
| FOXB1    | 2.911603 | 2.91E-18 |
| LITAF    | 0.413442 | 2.97E-18 |
| BRD7     | -0.29237 | 2.97E-18 |

|           |          |          |
|-----------|----------|----------|
| AREL1     | -0.45901 | 3.25E-18 |
| TNFRSF19  | 0.442913 | 3.48E-18 |
| VCPKMT    | -0.59749 | 3.65E-18 |
| GLYR1     | -0.33623 | 3.82E-18 |
| NIP7      | -0.35482 | 4.02E-18 |
| ALG2      | -0.44453 | 4.15E-18 |
| RUSC2     | 0.667878 | 4.19E-18 |
| HNRNPH1   | -0.37902 | 4.19E-18 |
| FAM103A1  | -0.47926 | 4.23E-18 |
| FKBP7     | 0.902494 | 4.42E-18 |
| DOK1      | 0.776637 | 4.79E-18 |
| LINC00052 | 0.955549 | 4.88E-18 |
| ATG101    | -0.37962 | 4.88E-18 |
| FBXO5     | -0.48903 | 5.12E-18 |
| LINC00888 | 0.927696 | 5.12E-18 |
| KDM4A     | -0.30184 | 5.25E-18 |
| PRPF4B    | -0.36064 | 5.61E-18 |
| IP6K1     | -0.453   | 5.90E-18 |
| SHCBP1    | -0.45501 | 6.15E-18 |
| RGS2      | 0.48793  | 6.26E-18 |
| AKAP10    | -0.51931 | 6.27E-18 |
| VPS11     | -0.45017 | 6.45E-18 |
| ZDHHC5    | -0.38826 | 6.64E-18 |
| MT1E      | 1.101928 | 6.85E-18 |
| RIPK2     | 0.390494 | 7.51E-18 |
| ZBTB7A    | -0.54394 | 8.01E-18 |
| ZNF532    | 0.409933 | 8.17E-18 |
| PPTC7     | -0.50938 | 8.46E-18 |
| CCND1     | -0.39769 | 8.66E-18 |
| ANXA2R    | 1.680311 | 9.12E-18 |
| ASPHD2    | 1.586975 | 9.12E-18 |
| KCNK5     | 1.0903   | 9.15E-18 |
| PRKG2     | 1.537097 | 9.33E-18 |
| ABHD17B   | -0.49061 | 9.40E-18 |
| POLR3G    | 0.453698 | 1.05E-17 |
| SAP130    | -0.39258 | 1.08E-17 |
| EPC2      | -0.355   | 1.10E-17 |
| ZNF557    | -0.63216 | 1.12E-17 |
| C17orf51  | 0.691229 | 1.27E-17 |
| TIGD7     | 0.669126 | 1.30E-17 |
| BRIX1     | -0.33502 | 1.48E-17 |
| SCAF1     | -0.48073 | 1.53E-17 |
| TESC      | 0.667958 | 1.58E-17 |
| UBAP2     | -0.42083 | 1.75E-17 |
| TBX18     | 0.525919 | 1.85E-17 |
| RAB11FIP2 | 0.567795 | 1.86E-17 |
| AAR2      | -0.37854 | 1.91E-17 |

|           |          |          |
|-----------|----------|----------|
| PPP1R15A  | -0.50595 | 1.94E-17 |
| NHLH1     | -1.87832 | 1.95E-17 |
| BEX4      | 0.641236 | 1.95E-17 |
| ZNF296    | -1.04677 | 2.05E-17 |
| AHCTF1    | -0.33822 | 2.19E-17 |
| CA2       | 0.659467 | 2.25E-17 |
| MTHFR     | -0.47378 | 2.32E-17 |
| EBF3      | 2.10122  | 2.59E-17 |
| IRX3      | 1.0634   | 2.59E-17 |
| OSER1     | -0.5104  | 2.59E-17 |
| KCNQ5     | 0.481981 | 2.64E-17 |
| NCALD     | 1.422399 | 2.64E-17 |
| TCERG1    | -0.29972 | 2.82E-17 |
| GPR63     | 1.132852 | 2.98E-17 |
| EIF4A2    | -0.29823 | 3.11E-17 |
| LEMD3     | -0.42493 | 3.31E-17 |
| ZNF503    | -0.39724 | 3.32E-17 |
| HELZ      | -0.44193 | 3.39E-17 |
| COG3      | -0.40008 | 3.45E-17 |
| AFF4      | -0.36442 | 3.57E-17 |
| WAC       | -0.30771 | 3.90E-17 |
| ELF1      | 0.592062 | 3.93E-17 |
| CRKL      | -0.4127  | 3.94E-17 |
| ZNF75A    | 0.426713 | 3.96E-17 |
| CSTF2T    | 0.417736 | 3.97E-17 |
| SETD8     | -0.33854 | 4.12E-17 |
| SRSF1     | -0.29671 | 4.25E-17 |
| NSDHL     | -0.40326 | 4.39E-17 |
| ACBD3     | -0.35052 | 4.69E-17 |
| ZFP37     | 0.83052  | 4.70E-17 |
| ZNF112    | 1.100617 | 4.76E-17 |
| SLC35F2   | 0.459672 | 4.78E-17 |
| LOC100506 | 1.307806 | 4.86E-17 |
| ABCC9     | 0.692386 | 5.03E-17 |
| LIPT2     | 0.808038 | 5.18E-17 |
| NDN       | 0.855267 | 5.32E-17 |
| CSRP2     | 0.700092 | 5.39E-17 |
| DGKE      | 0.481942 | 5.61E-17 |
| CAMK2N1   | 1.56762  | 5.61E-17 |
| UBE2G1    | -0.42296 | 5.76E-17 |
| TBC1D31   | 0.383907 | 5.97E-17 |
| LRIG3     | 0.653896 | 5.99E-17 |
| MED17     | -0.38042 | 6.10E-17 |
| WDR43     | -0.33654 | 6.16E-17 |
| CLCN6     | -0.49863 | 6.33E-17 |
| FOXA2     | -0.44635 | 6.40E-17 |
| LINC00491 | 0.998477 | 6.66E-17 |

|          |          |          |
|----------|----------|----------|
| ARID3B   | -0.75381 | 7.00E-17 |
| RBM43    | 1.074803 | 7.26E-17 |
| LUC7L    | -0.47662 | 7.42E-17 |
| NDEL1    | -0.41621 | 7.78E-17 |
| TPM1     | 0.437723 | 7.80E-17 |
| DGCR8    | -0.43409 | 7.81E-17 |
| CNOT3    | -0.53404 | 8.41E-17 |
| ZEB2     | 2.768125 | 8.88E-17 |
| SLC25A30 | 0.697716 | 8.93E-17 |
| PKIA     | 2.445328 | 9.28E-17 |
| CREBBP   | -0.32801 | 9.51E-17 |
| CARKD    | -0.43164 | 1.02E-16 |
| C2orf72  | 1.399972 | 1.06E-16 |
| C16orf72 | -0.32425 | 1.06E-16 |
| TICRR    | -0.38183 | 1.08E-16 |
| WAPAL    | -0.36564 | 1.13E-16 |
| KCTD2    | -0.46183 | 1.20E-16 |
| HHEX     | 1.090692 | 1.21E-16 |
| TP53     | -0.77297 | 1.23E-16 |
| NRIP1    | 0.472745 | 1.24E-16 |
| SLBP     | -0.3169  | 1.27E-16 |
| POFUT2   | -0.51665 | 1.27E-16 |
| SCAF8    | -0.32764 | 1.29E-16 |
| MYC      | -0.35085 | 1.32E-16 |
| LRRK2    | 1.824002 | 1.34E-16 |
| DDX39A   | -0.34786 | 1.38E-16 |
| AHR      | 0.432462 | 1.38E-16 |
| CLASP2   | 0.363526 | 1.39E-16 |
| ZNF721   | -0.33521 | 1.52E-16 |
| RBBP5    | -0.39423 | 1.56E-16 |
| VEGFA    | -0.31017 | 1.58E-16 |
| ZC3H13   | -0.35092 | 1.64E-16 |
| BEX1     | 0.584463 | 1.74E-16 |
| MYNN     | -0.39987 | 1.74E-16 |
| PLEKHA1  | 0.55752  | 1.79E-16 |
| SPRED3   | -1.35784 | 1.81E-16 |
| C17orf85 | -0.45347 | 1.84E-16 |
| EFCAB14  | -0.42104 | 1.98E-16 |
| PIM2     | -0.8505  | 2.12E-16 |
| MFN2     | -0.30195 | 2.17E-16 |
| NFKBIA   | -0.54426 | 2.25E-16 |
| DHX38    | -0.4059  | 2.28E-16 |
| SULT4A1  | 1.458804 | 2.29E-16 |
| AURKA    | -0.33668 | 2.47E-16 |
| ZNF234   | 1.028265 | 2.58E-16 |
| HYLS1    | 0.88274  | 2.65E-16 |
| SCYL1    | -0.39642 | 2.73E-16 |

|           |          |          |
|-----------|----------|----------|
| MAFF      | -0.5277  | 2.84E-16 |
| HMGXB4    | -0.35302 | 2.96E-16 |
| ZFP64     | 0.614143 | 3.16E-16 |
| RPS6KL1   | 0.709369 | 3.28E-16 |
| XDH       | 2.519594 | 3.30E-16 |
| LCMT2     | 0.554946 | 3.51E-16 |
| ZKSCAN5   | -0.39966 | 3.82E-16 |
| ETNPPL    | 1.622122 | 3.86E-16 |
| SNAI1     | 1.052075 | 3.88E-16 |
| ZNF239    | 1.272693 | 3.95E-16 |
| SPAG17    | 2.201683 | 4.11E-16 |
| CANT1     | -0.49804 | 4.11E-16 |
| ESCO1     | -0.44969 | 4.28E-16 |
| CCDC110   | 1.008862 | 4.38E-16 |
| CMTM3     | 0.962197 | 4.40E-16 |
| KAT5      | -0.34938 | 4.43E-16 |
| LOC652276 | -0.64065 | 4.66E-16 |
| ZNF280D   | 0.342839 | 4.82E-16 |
| SELT      | -0.32089 | 5.23E-16 |
| OSBPL2    | -0.45581 | 5.28E-16 |
| HOXB9     | 0.523143 | 5.40E-16 |
| PTCH1     | 1.261578 | 5.40E-16 |
| ZNF280A   | 1.342939 | 5.85E-16 |
| TCF12     | 0.319792 | 5.92E-16 |
| NFIL3     | 0.558316 | 5.99E-16 |
| PLK1      | -0.32333 | 6.17E-16 |
| GDPD1     | 1.265415 | 6.20E-16 |
| ZBTB49    | -0.71288 | 6.31E-16 |
| DNMBP     | 0.732306 | 6.50E-16 |
| TXNL1     | -0.34259 | 6.53E-16 |
| DSC2      | 0.755319 | 6.68E-16 |
| RSBN1     | -0.55047 | 7.03E-16 |
| RNF40     | -0.30602 | 7.15E-16 |
| PTP4A1    | -0.31054 | 7.21E-16 |
| ATG4D     | -0.37172 | 7.31E-16 |
| CITED2    | 0.757544 | 8.11E-16 |
| MOB3A     | 0.594691 | 8.18E-16 |
| IRX2      | -0.49249 | 8.66E-16 |
| UBAP2L    | -0.28358 | 8.69E-16 |
| KCNG3     | 1.10087  | 8.84E-16 |
| TAF1      | -0.34679 | 9.49E-16 |
| SLAIN1    | 0.53624  | 9.51E-16 |
| SLC25A25  | -0.37126 | 9.79E-16 |
| SPG20     | 0.856799 | 9.97E-16 |
| TSC1      | -0.50594 | 1.10E-15 |
| GSK3A     | -0.36945 | 1.10E-15 |
| BCL2L1    | -0.30743 | 1.15E-15 |



|         |          |          |
|---------|----------|----------|
| RAP2B   | 0.445607 | 1.23E-15 |
| EFNA4   | 0.921508 | 1.23E-15 |
| EIF3A   | -0.35451 | 1.25E-15 |
| YTHDC1  | -0.29948 | 1.27E-15 |
| C9orf40 | 0.634567 | 1.28E-15 |
| GOLPH3  | -0.28175 | 1.31E-15 |
| TMEM115 | -0.47203 | 1.32E-15 |
| NGDN    | -0.47292 | 1.42E-15 |
| HNRNPAB | -0.2707  | 1.43E-15 |
| TSPYL4  | 0.622063 | 1.46E-15 |
| MBIP    | -0.4214  | 1.54E-15 |
| KDM5C   | -0.32303 | 1.68E-15 |
| CLDN3   | 0.577558 | 1.79E-15 |
| TACC3   | -0.3426  | 1.80E-15 |
| PARM1   | 0.580523 | 1.81E-15 |
| CDC6    | -0.36566 | 1.85E-15 |
| ZNF232  | 0.818936 | 1.91E-15 |
| FTSJ3   | -0.32047 | 1.92E-15 |
| ZNF571  | 1.095346 | 1.94E-15 |
| ACVR1C  | 2.615842 | 1.99E-15 |
| FIGNL1  | 0.510071 | 2.06E-15 |
| SLC26A9 | 1.639646 | 2.06E-15 |
| NPTX1   | 1.960682 | 2.08E-15 |
| PROK2   | 2.672401 | 2.10E-15 |
| TERF2   | -0.32363 | 2.12E-15 |
| SRP68   | -0.31839 | 2.32E-15 |
| ARF4    | -0.3223  | 2.45E-15 |
| CENPN   | -0.33435 | 2.67E-15 |
| UTP14A  | -0.35487 | 2.69E-15 |
| CAPRIN2 | 0.570867 | 2.92E-15 |
| ZNF10   | 0.612327 | 2.94E-15 |
| RPS6KB1 | -0.36864 | 2.96E-15 |
| TFIP11  | -0.49328 | 3.09E-15 |
| EIF3B   | -0.27261 | 3.25E-15 |
| NRP2    | -0.30869 | 3.26E-15 |
| SF3B4   | -0.41326 | 3.41E-15 |
| EXOC8   | -0.44313 | 3.41E-15 |
| CLCN3   | 0.404918 | 3.47E-15 |
| PTGER3  | 1.613262 | 3.49E-15 |
| SH2D4A  | 0.560885 | 3.49E-15 |
| BMP8A   | 0.869836 | 3.51E-15 |
| ITPKC   | -0.65358 | 3.61E-15 |
| ARRDC4  | -0.29962 | 3.74E-15 |
| ZBTB14  | 0.808608 | 3.75E-15 |
| FGF4    | 1.537334 | 4.20E-15 |
| PHF21A  | 0.481078 | 4.25E-15 |
| BSPRY   | 0.847008 | 4.67E-15 |

|           |          |          |
|-----------|----------|----------|
| HRH1      | 2.544601 | 5.13E-15 |
| DDX20     | -0.36076 | 5.25E-15 |
| WDR37     | -0.61383 | 5.29E-15 |
| C22orf46  | 1.061305 | 5.35E-15 |
| SNHG16    | -0.36021 | 5.63E-15 |
| NRN1      | 1.064158 | 5.80E-15 |
| PTGER4    | 0.463056 | 6.05E-15 |
| LOC150776 | -0.36827 | 6.32E-15 |
| WDR62     | -0.32955 | 6.40E-15 |
| KIAA0947  | -0.33707 | 6.41E-15 |
| TCEB3     | -0.34779 | 6.43E-15 |
| RAB30     | 0.465425 | 6.58E-15 |
| ZNF230    | 0.751549 | 7.06E-15 |
| SHB       | -0.32948 | 7.09E-15 |
| FZD4      | 1.219347 | 7.13E-15 |
| GORASP2   | -0.27935 | 7.13E-15 |
| ZFP36L1   | 0.404483 | 7.41E-15 |
| COTL1     | 0.81222  | 7.57E-15 |
| LRRN1     | 0.961582 | 7.63E-15 |
| RNF4      | -0.3457  | 7.75E-15 |
| STARD13   | 0.897488 | 7.89E-15 |
| KIAA0922  | 0.614935 | 8.25E-15 |
| GUCD1     | -0.40719 | 8.48E-15 |
| PTRF      | 0.846392 | 8.66E-15 |
| C5orf51   | -0.3329  | 8.73E-15 |
| SPATA5L1  | -0.36548 | 8.73E-15 |
| PIK3R3    | -0.31717 | 9.00E-15 |
| SP2       | -0.37748 | 9.35E-15 |
| TRAM1L1   | 1.561663 | 9.41E-15 |
| ATAD2     | -0.28134 | 9.66E-15 |
| ZNF792    | 1.698738 | 9.67E-15 |
| TUBB2A    | -0.35805 | 1.03E-14 |
| LHX6      | 0.799884 | 1.11E-14 |
| SLC39A9   | -0.4067  | 1.12E-14 |
| DLGAP3    | 1.437901 | 1.16E-14 |
| TRIP11    | -0.38795 | 1.17E-14 |
| C10orf126 | 0.578975 | 1.24E-14 |
| AK4       | 0.43735  | 1.28E-14 |
| CLDND1    | 0.308133 | 1.32E-14 |
| SIRT7     | -0.50207 | 1.33E-14 |
| HOXB7     | 0.566864 | 1.34E-14 |
| SLC20A2   | -0.50384 | 1.41E-14 |
| WNT11     | 0.650804 | 1.42E-14 |
| GPR180    | 0.464473 | 1.47E-14 |
| AP3D1     | -0.2839  | 1.47E-14 |
| BRD8      | -0.37358 | 1.47E-14 |
| NEIL3     | 0.503823 | 1.48E-14 |

|           |          |          |
|-----------|----------|----------|
| YME1L1    | -0.27846 | 1.59E-14 |
| BIRC3     | 2.085223 | 1.61E-14 |
| ST7       | 0.486246 | 1.64E-14 |
| IPPK      | -0.5331  | 1.75E-14 |
| SIX4      | 0.581992 | 1.75E-14 |
| NOP58     | -0.29349 | 1.77E-14 |
| KBTBD11   | 1.416694 | 1.80E-14 |
| XAB2      | -0.31502 | 1.85E-14 |
| NEU1      | -0.44557 | 2.01E-14 |
| LOC101929 | 1.940972 | 2.09E-14 |
| ZEB1-AS1  | 1.27072  | 2.19E-14 |
| ACO2      | -0.29512 | 2.19E-14 |
| POU3F2    | 0.385694 | 2.22E-14 |
| ABHD2     | -0.37562 | 2.26E-14 |
| ARID3A    | 0.891101 | 2.30E-14 |
| PSMD1     | -0.28065 | 2.51E-14 |
| RCOR2     | 1.271937 | 2.53E-14 |
| KDELC2    | 0.330505 | 2.71E-14 |
| PLCL2     | 0.914246 | 2.72E-14 |
| FBXO41    | 0.750825 | 2.83E-14 |
| MRPL44    | -0.35689 | 2.89E-14 |
| VDR       | 1.021069 | 2.92E-14 |
| FAM43B    | 1.171972 | 2.98E-14 |
| DNAJA2    | -0.33087 | 3.00E-14 |
| FOXD2     | 2.57075  | 3.06E-14 |
| PPL       | 0.665428 | 3.07E-14 |
| HN1       | -0.2634  | 3.11E-14 |
| CBLL1     | -0.3285  | 3.15E-14 |
| DDAH1     | 0.44066  | 3.41E-14 |
| ARL5B     | -0.36977 | 3.48E-14 |
| TGFA      | 0.698716 | 3.49E-14 |
| C11orf57  | -0.40216 | 3.54E-14 |
| DHX16     | -0.29493 | 3.55E-14 |
| PNRC2     | -0.32343 | 3.89E-14 |
| SDR16C5   | 0.469708 | 3.89E-14 |
| ITGB8     | 1.328516 | 3.91E-14 |
| PHAX      | -0.30046 | 4.03E-14 |
| ZNF681    | 0.90762  | 4.26E-14 |
| CDC7      | 0.398213 | 4.42E-14 |
| CNOT4     | -0.41411 | 4.53E-14 |
| PCNT      | -0.30824 | 4.64E-14 |
| ZNF572    | 0.963501 | 4.69E-14 |
| TGIF2     | 0.50559  | 4.72E-14 |
| ENPP5     | 2.385477 | 4.73E-14 |
| BAG4      | -0.32912 | 4.74E-14 |
| FBXW7     | -0.74346 | 5.03E-14 |
| FUS       | -0.25179 | 5.09E-14 |

|           |          |          |
|-----------|----------|----------|
| LSM1      | -0.29523 | 5.39E-14 |
| DYNLL1    | -0.3182  | 5.41E-14 |
| ZBTB17    | -0.51387 | 5.46E-14 |
| POLG      | -0.28473 | 5.65E-14 |
| SEMA7A    | 0.869232 | 5.67E-14 |
| ZNF485    | 1.07853  | 5.76E-14 |
| E4F1      | -0.33397 | 6.22E-14 |
| ARHGAP29  | 2.112817 | 6.31E-14 |
| SFPQ      | -0.2611  | 6.69E-14 |
| RYR2      | 2.133642 | 7.00E-14 |
| SFRP1     | 0.599951 | 7.12E-14 |
| CDC42EP1  | 1.447415 | 7.61E-14 |
| BNIP2     | -0.33922 | 7.78E-14 |
| PLAA      | -0.34407 | 7.80E-14 |
| AGPAT9    | 0.574317 | 7.99E-14 |
| SQSTM1    | -0.26306 | 7.99E-14 |
| GFER      | -0.36605 | 8.40E-14 |
| KIAA1324L | 0.33748  | 8.59E-14 |
| TOR1AIP1  | -0.30458 | 8.59E-14 |
| SOX2      | -0.28418 | 8.76E-14 |
| NOL8      | -0.37172 | 8.92E-14 |
| FAM46C    | 0.402485 | 9.13E-14 |
| HLTF      | 0.320346 | 9.39E-14 |
| GOSR1     | -0.28693 | 9.47E-14 |
| FLCN      | -0.70291 | 9.66E-14 |
| SHISA9    | 0.281683 | 1.01E-13 |
| HMGCS1    | -0.3267  | 1.06E-13 |
| MREG      | 0.667012 | 1.08E-13 |
| C6orf120  | 0.379958 | 1.14E-13 |
| FAM115A   | 0.363558 | 1.15E-13 |
| SKIL      | -0.36651 | 1.16E-13 |
| GNAI2     | -0.30327 | 1.22E-13 |
| LAMC2     | 1.143373 | 1.23E-13 |
| MAX       | -0.37694 | 1.27E-13 |
| IGSF3     | 0.418767 | 1.29E-13 |
| GJA3      | 1.535734 | 1.35E-13 |
| TM9SF4    | -0.28922 | 1.36E-13 |
| COLGALT2  | 0.507243 | 1.37E-13 |
| KPNA6     | -0.28776 | 1.40E-13 |
| C7orf31   | 1.160922 | 1.44E-13 |
| GNA11     | -0.29547 | 1.46E-13 |
| PHACTR1   | 1.509036 | 1.46E-13 |
| MAGEA3    | -0.3147  | 1.51E-13 |
| ULBP1     | 0.601383 | 1.58E-13 |
| EFNB2     | 0.439294 | 1.64E-13 |
| BCL6      | 0.462171 | 1.71E-13 |
| TOB2P1    | 1.316159 | 1.72E-13 |

|           |          |          |
|-----------|----------|----------|
| ACSL4     | 0.499082 | 1.78E-13 |
| CYP26B1   | 1.944926 | 1.83E-13 |
| PCDH19    | -0.28133 | 1.91E-13 |
| PLEKHG1   | 0.374844 | 1.93E-13 |
| SLC4A8    | 0.33419  | 1.93E-13 |
| LOC100379 | 1.388642 | 2.01E-13 |
| CTCF      | -0.28886 | 2.09E-13 |
| AP1S3     | 0.521368 | 2.12E-13 |
| PNMA2     | 2.165285 | 2.15E-13 |
| FAM43A    | -0.26792 | 2.23E-13 |
| ZNF622    | -0.53886 | 2.24E-13 |
| RAB11FIP5 | 1.160759 | 2.29E-13 |
| HCFC2     | -0.67654 | 2.34E-13 |
| IREB2     | -0.2818  | 2.42E-13 |
| WNT16     | 1.921948 | 2.43E-13 |
| QRICH1    | -0.31171 | 2.49E-13 |
| NOL9      | -0.40649 | 2.58E-13 |
| GPNMB     | 2.107377 | 2.60E-13 |
| CDC37L1   | -0.44423 | 2.62E-13 |
| CLIP4     | 0.997007 | 2.71E-13 |
| RBM42     | -0.28859 | 2.74E-13 |
| NUAK2     | 1.497214 | 2.85E-13 |
| STON2     | 0.678965 | 2.90E-13 |
| NUMA1     | -0.26234 | 2.96E-13 |
| IL1RAP    | 1.415599 | 2.97E-13 |
| C10orf2   | -0.44648 | 3.00E-13 |
| ZNF217    | 0.307324 | 3.02E-13 |
| NOP56     | -0.26374 | 3.04E-13 |
| RBM17     | -0.27917 | 3.06E-13 |
| UBAP1     | -0.2906  | 3.17E-13 |
| DNMT3B    | 0.566009 | 3.20E-13 |
| ZNF343    | 0.62756  | 3.28E-13 |
| WBP11     | -0.28716 | 3.44E-13 |
| DYRK3     | 1.146556 | 3.49E-13 |
| SAR1A     | -0.27898 | 3.54E-13 |
| MFSD2A    | 0.301843 | 3.54E-13 |
| STOM      | 1.00592  | 3.65E-13 |
| SMARCD1   | -0.29788 | 3.68E-13 |
| MOB1A     | -0.30198 | 3.72E-13 |
| NFE2L2    | -0.27886 | 3.73E-13 |
| LOC100862 | -0.65049 | 3.74E-13 |
| DDX42     | -0.29106 | 3.80E-13 |
| FN1       | 0.414147 | 3.82E-13 |
| RAB40C    | -0.53835 | 3.89E-13 |
| CEP350    | -0.3809  | 3.90E-13 |
| SRD5A3    | 0.423576 | 3.96E-13 |
| PTGER4P2- | 2.358769 | 4.10E-13 |

|           |          |          |
|-----------|----------|----------|
| SYK       | -0.27436 | 4.19E-13 |
| STK11     | -0.30056 | 4.23E-13 |
| KLF15     | 1.120454 | 4.32E-13 |
| NAPEPLD   | 1.115935 | 4.33E-13 |
| DCP1A     | -0.31424 | 4.46E-13 |
| NKX3-1    | 0.749117 | 4.53E-13 |
| DRAM1     | 0.478112 | 4.66E-13 |
| LANCL2    | -0.32148 | 4.70E-13 |
| TSHZ1     | 0.789888 | 4.71E-13 |
| SERTM1    | 2.269543 | 4.72E-13 |
| PALB2     | -0.54477 | 4.74E-13 |
| STOX1     | 0.614245 | 4.74E-13 |
| ABCF1     | -0.29197 | 5.29E-13 |
| GSC       | 1.894458 | 5.43E-13 |
| PRRT3     | 0.845903 | 5.52E-13 |
| MEX3D     | -0.36834 | 5.60E-13 |
| VAMP3     | -0.30349 | 5.71E-13 |
| LGALS1    | 0.469454 | 5.71E-13 |
| ZNF18     | 0.857624 | 5.86E-13 |
| GPR27     | 1.090894 | 6.02E-13 |
| RLIM      | -0.28067 | 6.18E-13 |
| EIF3J     | -0.26083 | 6.22E-13 |
| WIPF3     | 2.160658 | 6.26E-13 |
| PP7080    | 0.6432   | 6.32E-13 |
| ZSCAN12P1 | 0.762057 | 6.75E-13 |
| EMC8      | -0.28112 | 6.75E-13 |
| EPB41L4A- | -0.39786 | 6.81E-13 |
| MYEF2     | 0.29586  | 6.87E-13 |
| IL12A     | 1.407078 | 6.98E-13 |
| C19orf24  | -0.47036 | 6.99E-13 |
| STARD7    | -0.29769 | 7.26E-13 |
| ORC6      | -0.28994 | 7.32E-13 |
| PUM2      | -0.28179 | 7.59E-13 |
| KIFC1     | -0.34512 | 7.67E-13 |
| HNRNPDL   | -0.26567 | 7.72E-13 |
| C3orf33   | 0.842363 | 7.87E-13 |
| TMEM11    | -0.41513 | 7.87E-13 |
| CTR9      | -0.28973 | 8.22E-13 |
| GBX2      | 0.783504 | 8.38E-13 |
| CSGALNAC  | 1.028693 | 8.60E-13 |
| GID8      | -0.34349 | 8.64E-13 |
| RNASEH1   | -0.33337 | 8.92E-13 |
| CASC9     | 0.443212 | 9.30E-13 |
| BCAR3     | 1.042403 | 9.31E-13 |
| GFPT2     | 0.459275 | 9.37E-13 |
| EIF4G1    | -0.2311  | 9.41E-13 |
| ARHGEF2   | 0.460465 | 9.52E-13 |

|           |          |          |
|-----------|----------|----------|
| RRAGC     | -0.33448 | 9.80E-13 |
| HTR1D     | 1.613603 | 1.00E-12 |
| POLQ      | -0.41509 | 1.01E-12 |
| CSTF1     | -0.36746 | 1.04E-12 |
| FAM217B   | 0.403463 | 1.09E-12 |
| SYNJ1     | -0.41122 | 1.11E-12 |
| SMCR8     | -0.35202 | 1.14E-12 |
| ACBD5     | 0.413256 | 1.14E-12 |
| GON4L     | -0.3081  | 1.19E-12 |
| SLC27A2   | 0.617162 | 1.20E-12 |
| C16orf80  | -0.26418 | 1.20E-12 |
| GTF2F1    | -0.27146 | 1.22E-12 |
| AXIN1     | -0.33977 | 1.24E-12 |
| LOC100129 | -0.51348 | 1.28E-12 |
| WDR26     | -0.31437 | 1.32E-12 |
| MAST4     | 1.174785 | 1.33E-12 |
| USP1      | -0.30233 | 1.43E-12 |
| HAUS2     | -0.31929 | 1.45E-12 |
| PHLDA2    | 1.223218 | 1.48E-12 |
| BAZ1B     | -0.25812 | 1.50E-12 |
| TBC1D30   | 0.623529 | 1.52E-12 |
| ZNF687    | -0.29982 | 1.53E-12 |
| NAA25     | -0.28738 | 1.53E-12 |
| EFCC1     | 0.39     | 1.58E-12 |
| SRCAP     | -0.34912 | 1.59E-12 |
| MSL2      | -0.29875 | 1.62E-12 |
| GADD45A   | 0.514684 | 1.70E-12 |
| TEX14     | -0.77223 | 1.72E-12 |
| SOX7      | 1.01849  | 1.78E-12 |
| GALNT3    | 1.897469 | 1.78E-12 |
| TTC8      | 0.405474 | 1.82E-12 |
| PGAP1     | 0.439711 | 1.83E-12 |
| LBH       | 0.311309 | 1.90E-12 |
| ZFP90     | 0.511565 | 1.95E-12 |
| CRTC2     | -0.33008 | 1.99E-12 |
| NOLC1     | -0.24046 | 2.05E-12 |
| CALR      | -0.24019 | 2.06E-12 |
| APOBEC3F  | 0.606607 | 2.06E-12 |
| ZNF585A   | 0.684906 | 2.06E-12 |
| TBC1D20   | -0.477   | 2.08E-12 |
| PNPLA2    | -0.48818 | 2.08E-12 |
| AZIN1     | -0.28015 | 2.11E-12 |
| TSKU      | 0.472531 | 2.22E-12 |
| LRIG1     | -0.36295 | 2.23E-12 |
| GPATCH8   | -0.30119 | 2.28E-12 |
| DUSP14    | 0.343682 | 2.28E-12 |
| ZNF266    | -0.41448 | 2.32E-12 |

|           |          |          |
|-----------|----------|----------|
| ANKLE2    | -0.36599 | 2.33E-12 |
| SETDB2    | 0.576455 | 2.34E-12 |
| ETS2      | 0.493767 | 2.38E-12 |
| SP140L    | 0.439708 | 2.44E-12 |
| PPM1B     | -0.30941 | 2.44E-12 |
| ITPKB     | 0.708825 | 2.55E-12 |
| PPM1K     | 0.690197 | 2.59E-12 |
| ZZEF1     | -0.36263 | 2.60E-12 |
| ZC3H18    | -0.28618 | 2.70E-12 |
| YARS2     | -0.38178 | 2.70E-12 |
| PPIG      | -0.27568 | 2.72E-12 |
| LPP-AS2   | 1.533675 | 2.83E-12 |
| LINC00847 | 0.83882  | 2.84E-12 |
| MESTIT1   | 1.433107 | 2.88E-12 |
| BAG5      | -0.29313 | 2.88E-12 |
| TBK1      | -0.32934 | 2.93E-12 |
| BYSL      | -0.31559 | 2.93E-12 |
| PCDHB14   | 0.90088  | 2.96E-12 |
| SNX5      | -0.30953 | 2.97E-12 |
| C14orf132 | 0.920206 | 2.99E-12 |
| CHD4      | -0.23841 | 3.13E-12 |
| CDKL2     | 0.938489 | 3.18E-12 |
| GPR176    | 0.576565 | 3.20E-12 |
| MYH7B     | -0.40831 | 3.24E-12 |
| ADAMTS2C  | 1.780341 | 3.27E-12 |
| ABHD15    | 0.709694 | 3.28E-12 |
| PRKAB1    | -0.34657 | 3.30E-12 |
| TMC7      | 0.686225 | 3.31E-12 |
| MRPL38    | -0.34571 | 3.41E-12 |
| BVES      | 1.57634  | 3.46E-12 |
| SAFB      | -0.31947 | 3.47E-12 |
| MICU3     | 0.477802 | 3.51E-12 |
| SGMS2     | 0.793971 | 3.51E-12 |
| ATG13     | -0.33862 | 3.53E-12 |
| LRRC4     | 1.28059  | 3.57E-12 |
| WBP1L     | -0.46943 | 3.57E-12 |
| ZNF654    | -0.50755 | 3.66E-12 |
| HSPA9     | -0.24154 | 3.67E-12 |
| KIAA0513  | 0.836651 | 3.74E-12 |
| CDK16     | -0.35628 | 3.77E-12 |
| ZNF12     | -0.33518 | 3.85E-12 |
| PLEKHA8P1 | 1.76245  | 3.92E-12 |
| MGA       | 0.49028  | 3.94E-12 |
| C15orf38  | 1.354521 | 3.95E-12 |
| FZD6      | 0.379298 | 4.11E-12 |
| NUP153    | -0.28375 | 4.12E-12 |
| PLEKHM2   | -0.27451 | 4.28E-12 |



|           |          |          |
|-----------|----------|----------|
| SREBF2    | -0.26364 | 4.32E-12 |
| GMEB2     | -0.34201 | 4.39E-12 |
| WDR24     | -0.44351 | 4.54E-12 |
| NEDD9     | 0.309409 | 4.60E-12 |
| BUD31     | -0.29898 | 4.67E-12 |
| GIGYF2    | -0.27513 | 5.07E-12 |
| LIN52     | -0.43094 | 5.24E-12 |
| NETO2     | 0.292267 | 5.34E-12 |
| FAM212B   | 0.871104 | 5.42E-12 |
| PSMC4     | -0.26289 | 5.44E-12 |
| GRPEL1    | -0.33008 | 5.45E-12 |
| WDR20     | -0.38808 | 5.50E-12 |
| HECTD1    | -0.27024 | 5.62E-12 |
| TMEM59L   | 1.920886 | 5.68E-12 |
| DLC1      | 2.234746 | 5.70E-12 |
| LAMTOR3   | -0.46774 | 5.73E-12 |
| ARF6      | -0.31842 | 5.86E-12 |
| FAM76B    | -0.31551 | 5.98E-12 |
| FAM107B   | 0.603219 | 6.04E-12 |
| CDC14A    | 0.347085 | 6.04E-12 |
| CLPX      | -0.28539 | 6.22E-12 |
| ATG2A     | -0.45586 | 6.47E-12 |
| ASB7      | -0.46381 | 6.49E-12 |
| MARK2     | -0.32432 | 6.50E-12 |
| AJUBA     | 0.957798 | 6.66E-12 |
| SRSF10    | -0.27291 | 6.68E-12 |
| ADPRHL2   | -0.44658 | 6.74E-12 |
| DSEL      | 1.043743 | 6.76E-12 |
| TSR1      | -0.27644 | 6.92E-12 |
| GTPBP4    | -0.25776 | 7.01E-12 |
| CLCN5     | 0.693251 | 7.18E-12 |
| PSMD5-AS: | 1.080368 | 7.52E-12 |
| ZNF597    | -0.60835 | 7.62E-12 |
| B3GNT5    | 0.326188 | 7.67E-12 |
| TOMM70A   | -0.28804 | 7.69E-12 |
| ANKRD11   | -0.3481  | 7.83E-12 |
| TLK2      | -0.26801 | 7.93E-12 |
| ARPC5L    | -0.33485 | 8.04E-12 |
| ISM2      | 1.84968  | 8.04E-12 |
| ATAD5     | -0.28983 | 8.04E-12 |
| BIK       | 0.818484 | 8.06E-12 |
| PI4KB     | -0.27727 | 8.27E-12 |
| RFXAP     | 0.557972 | 8.37E-12 |
| JUN       | -0.24115 | 8.37E-12 |
| SEC61A1   | -0.25012 | 8.41E-12 |
| SLC3A2    | -0.26042 | 8.44E-12 |
| JAM3      | 0.611485 | 8.56E-12 |

|           |          |          |
|-----------|----------|----------|
| DDX21     | -0.25327 | 8.56E-12 |
| NMT1      | -0.24141 | 8.72E-12 |
| SPTAN1    | -0.25865 | 8.72E-12 |
| CDKN2AIP  | -0.31275 | 8.87E-12 |
| COPS2     | -0.24232 | 9.00E-12 |
| SLC30A3   | 1.007941 | 9.05E-12 |
| PRRG1     | 0.746226 | 9.48E-12 |
| SLC9A2    | 0.497956 | 9.60E-12 |
| CHAC2     | 0.452084 | 9.96E-12 |
| HTATSF1P2 | 0.929492 | 9.98E-12 |
| GDF6      | 2.120497 | 1.00E-11 |
| USP22     | -0.24269 | 1.01E-11 |
| POU4F1    | 0.737291 | 1.01E-11 |
| ATG16L1   | -0.35333 | 1.01E-11 |
| PIP4K2A   | 0.458285 | 1.02E-11 |
| GOLGA2    | -0.28797 | 1.05E-11 |
| FUBP3     | -0.28628 | 1.08E-11 |
| ZNF174    | 0.443827 | 1.14E-11 |
| ANGPTL4   | 1.246856 | 1.19E-11 |
| FAM184A   | 0.361001 | 1.20E-11 |
| ZSCAN32   | -0.45499 | 1.22E-11 |
| RNMT      | -0.34979 | 1.26E-11 |
| CPSF7     | -0.32787 | 1.26E-11 |
| ITGA4     | 1.404766 | 1.26E-11 |
| SAP30BP   | -0.36002 | 1.28E-11 |
| TGFB2     | -0.28357 | 1.30E-11 |
| GDF15     | 0.692527 | 1.30E-11 |
| ZBTB24    | 0.411495 | 1.32E-11 |
| ITCH      | -0.28871 | 1.33E-11 |
| LRRC20    | 0.337228 | 1.37E-11 |
| PSMD3     | -0.26779 | 1.39E-11 |
| NBR1      | -0.31648 | 1.39E-11 |
| TAF1D     | -0.27401 | 1.40E-11 |
| C16orf91  | -0.43996 | 1.40E-11 |
| CNOT2     | -0.28138 | 1.42E-11 |
| NOL6      | -0.27479 | 1.46E-11 |
| TIMM44    | -0.28091 | 1.47E-11 |
| GLCE      | 0.45595  | 1.48E-11 |
| BCOR      | 0.369076 | 1.48E-11 |
| TINCR     | 1.457501 | 1.48E-11 |
| HES2      | 1.779232 | 1.49E-11 |
| MNX1      | 1.125527 | 1.49E-11 |
| PLEKHA5   | 0.42587  | 1.50E-11 |
| PXDC1     | 0.632649 | 1.52E-11 |
| GTF3C1    | -0.23468 | 1.52E-11 |
| ZCCHC8    | -0.31234 | 1.54E-11 |
| OSMR      | 1.197558 | 1.60E-11 |

|          |          |          |
|----------|----------|----------|
| RIC8B    | 0.37193  | 1.62E-11 |
| ARMCX4   | 0.734623 | 1.63E-11 |
| TMEM221  | 1.783724 | 1.64E-11 |
| RNF168   | -0.31806 | 1.64E-11 |
| DGAT2    | 1.361053 | 1.71E-11 |
| TBC1D10B | -0.37522 | 1.80E-11 |
| EIF4E3   | 0.495197 | 1.80E-11 |
| AP5Z1    | -0.38129 | 1.83E-11 |
| ZNF554   | 0.872957 | 1.84E-11 |
| UBR2     | -0.28093 | 1.84E-11 |
| TMEM222  | -0.32729 | 1.84E-11 |
| PLK3     | -0.3311  | 1.85E-11 |
| GPR37    | 1.82874  | 1.88E-11 |
| FZD7     | 0.915075 | 1.88E-11 |
| DNAJA3   | -0.2791  | 2.02E-11 |
| PM20D2   | 0.32889  | 2.02E-11 |
| RTF1     | -0.27609 | 2.04E-11 |
| ZNF3     | -0.34057 | 2.09E-11 |
| CCDC47   | -0.26544 | 2.13E-11 |
| MLLT11   | 0.323136 | 2.13E-11 |
| EMR2     | 1.448702 | 2.14E-11 |
| GET4     | -0.30369 | 2.15E-11 |
| HKR1     | -0.30007 | 2.18E-11 |
| PPAPDC2  | 0.792604 | 2.29E-11 |
| CCNK     | -0.32807 | 2.37E-11 |
| FRMD4B   | 1.385018 | 2.43E-11 |
| ELOVL7   | 0.539486 | 2.49E-11 |
| FBXO45   | -0.29439 | 2.49E-11 |
| SART1    | -0.29769 | 2.49E-11 |
| MEIS1    | 0.999931 | 2.50E-11 |
| TRIM28   | -0.31227 | 2.55E-11 |
| CDYL     | 0.293915 | 2.56E-11 |
| DHX30    | -0.30882 | 2.57E-11 |
| MFSD5    | -0.55231 | 2.61E-11 |
| TMCO3    | -0.34759 | 2.61E-11 |
| PDCD7    | -0.32396 | 2.62E-11 |
| FAM220A  | 0.676292 | 2.66E-11 |
| ZNF783   | 0.737043 | 2.75E-11 |
| PSMC6    | -0.27438 | 2.78E-11 |
| SNCA     | 0.951747 | 2.84E-11 |
| ACIN1    | -0.23289 | 2.96E-11 |
| KANK1    | 0.300634 | 2.97E-11 |
| DAB2     | 1.820022 | 2.98E-11 |
| TIGD2    | 1.213222 | 3.00E-11 |
| B3GALT6  | 0.530998 | 3.00E-11 |
| ARMCX5   | 0.400389 | 3.04E-11 |
| DPF2     | -0.28098 | 3.04E-11 |

|           |          |          |
|-----------|----------|----------|
| HUWE1     | -0.28276 | 3.18E-11 |
| SURF6     | -0.35228 | 3.24E-11 |
| HOXA1     | 1.034507 | 3.30E-11 |
| MAFG      | -0.29326 | 3.31E-11 |
| ARC       | 1.143307 | 3.36E-11 |
| RABGGTB   | -0.34444 | 3.42E-11 |
| KLRG2     | 1.521691 | 3.43E-11 |
| ZNF165    | 0.598868 | 3.48E-11 |
| ZNF555    | 0.605659 | 3.48E-11 |
| ZNF16     | -0.56152 | 3.51E-11 |
| RNMTL1    | -0.38415 | 3.68E-11 |
| TK2       | 0.866922 | 3.72E-11 |
| CXXC5     | 0.821456 | 3.79E-11 |
| KCNS3     | 0.57317  | 3.80E-11 |
| C11orf82  | -0.31572 | 3.86E-11 |
| FAM175B   | -0.33363 | 3.90E-11 |
| ZBED5-AS1 | 1.136974 | 3.94E-11 |
| PTPN13    | 0.453037 | 4.05E-11 |
| DCLRE1A   | 0.349573 | 4.09E-11 |
| BARX2     | 0.834543 | 4.10E-11 |
| TFCP2L1   | 0.777169 | 4.11E-11 |
| WNT5B     | 1.262107 | 4.11E-11 |
| UQCRFS1   | -0.26217 | 4.15E-11 |
| TFAP2A    | 0.46979  | 4.15E-11 |
| NCL       | -0.23925 | 4.27E-11 |
| RNF122    | 0.994909 | 4.31E-11 |
| FEZF1-AS1 | 1.768523 | 4.33E-11 |
| MAPK1IP1I | -0.263   | 4.37E-11 |
| WNT5A     | 0.34146  | 4.44E-11 |
| RAB5C     | -0.26418 | 4.55E-11 |
| FAM169A   | 0.4418   | 4.59E-11 |
| ZNF547    | -1.07973 | 4.59E-11 |
| ZNF30     | 0.731202 | 4.70E-11 |
| KIF2C     | -0.264   | 4.74E-11 |
| MED15     | -0.39179 | 5.05E-11 |
| MYSM1     | -0.38755 | 5.09E-11 |
| UNC5B     | 1.036677 | 5.42E-11 |
| RANBP3    | -0.24742 | 5.45E-11 |
| PPP2R5B   | 0.631767 | 5.63E-11 |
| FTSJ2     | -0.29569 | 5.70E-11 |
| NUP214    | -0.29318 | 5.70E-11 |
| KDM3B     | -0.25219 | 5.95E-11 |
| NSUN2     | -0.2516  | 5.95E-11 |
| CDK7      | -0.34252 | 6.00E-11 |
| TADA2B    | -0.47107 | 6.00E-11 |
| FAM124A   | 1.49265  | 6.07E-11 |
| TLE4      | 0.780614 | 6.18E-11 |

|           |          |          |
|-----------|----------|----------|
| DHX9      | -0.23874 | 6.19E-11 |
| CAND2     | 0.962125 | 6.40E-11 |
| QSOX2     | -0.27437 | 6.48E-11 |
| SLC35E1   | -0.26898 | 6.53E-11 |
| POU3F1    | 1.340976 | 6.55E-11 |
| ATXN7L3   | -0.3211  | 6.58E-11 |
| LINC00657 | -0.27316 | 6.76E-11 |
| STRN3     | -0.27966 | 6.95E-11 |
| TMEM98    | 1.857696 | 6.97E-11 |
| TXLNG     | -0.26871 | 7.19E-11 |
| YOD1      | -0.43116 | 7.22E-11 |
| ZNF384    | -0.27761 | 7.23E-11 |
| ADAMTSL2  | -0.32606 | 7.23E-11 |
| CYP2S1    | 0.637217 | 7.32E-11 |
| HPS5      | -0.38713 | 7.41E-11 |
| MRPS18B   | -0.2553  | 7.52E-11 |
| HSPA4L    | 0.29923  | 7.56E-11 |
| IST1      | -0.24047 | 7.56E-11 |
| SENP5     | -0.28278 | 7.58E-11 |
| HIPK3     | -0.34057 | 7.63E-11 |
| MAP1S     | -0.33673 | 7.67E-11 |
| LIFR      | 0.297291 | 7.80E-11 |
| PDHX      | -0.27868 | 7.89E-11 |
| MTF2      | -0.39505 | 7.99E-11 |
| CENPC     | -0.34658 | 8.23E-11 |
| GJA1      | 1.858384 | 8.24E-11 |
| MTMR9     | -0.31167 | 8.30E-11 |
| CDC23     | -0.2538  | 8.31E-11 |
| SLC38A2   | -0.34347 | 8.33E-11 |
| GZF1      | -0.38994 | 8.33E-11 |
| KMT2A     | -0.34853 | 8.34E-11 |
| MAGEE1    | 0.908495 | 8.39E-11 |
| ACTN2     | 1.522973 | 8.47E-11 |
| CDK11B    | -0.37259 | 8.47E-11 |
| NUP98     | -0.27859 | 8.55E-11 |
| TAF7      | 0.322017 | 8.68E-11 |
| IL20RA    | 1.24041  | 8.78E-11 |
| CAMK2N2   | 0.729004 | 8.90E-11 |
| MTHFD2P1  | 0.586502 | 9.28E-11 |
| DNAJC13   | -0.27653 | 9.58E-11 |
| MRAS      | 1.602638 | 9.58E-11 |
| BLOC1S4   | 0.895189 | 9.82E-11 |
| SMAD4     | -0.30626 | 9.97E-11 |
| L1CAM     | 1.691096 | 1.00E-10 |
| C15orf39  | 0.371448 | 1.01E-10 |
| EHHADH    | 0.528661 | 1.03E-10 |
| GJB2      | 1.724777 | 1.03E-10 |

|          |          |          |
|----------|----------|----------|
| KLF7     | 0.356181 | 1.03E-10 |
| RHOBTB1  | 0.744185 | 1.05E-10 |
| STX5     | -0.27662 | 1.09E-10 |
| DBX1     | 1.412903 | 1.10E-10 |
| HAGLR    | 1.319101 | 1.12E-10 |
| UTP15    | -0.3859  | 1.17E-10 |
| TMEM182  | 0.741081 | 1.19E-10 |
| MYBL1    | 0.817487 | 1.20E-10 |
| TRIM65   | 0.407898 | 1.20E-10 |
| HSPA14   | -0.30616 | 1.21E-10 |
| TFRC     | -0.23886 | 1.21E-10 |
| METAP2   | -0.23312 | 1.24E-10 |
| MGC57346 | 0.597642 | 1.24E-10 |
| TM2D3    | -0.50501 | 1.25E-10 |
| KLHL21   | 0.37102  | 1.25E-10 |
| NRAP     | 0.440248 | 1.27E-10 |
| DNAJC25  | -0.47515 | 1.28E-10 |
| RBM48    | -0.54002 | 1.30E-10 |
| MISP     | 0.323053 | 1.31E-10 |
| MAGEA6   | -0.29872 | 1.35E-10 |
| DTX4     | 1.3105   | 1.41E-10 |
| ILKAP    | -0.32931 | 1.45E-10 |
| GDNF     | 0.433587 | 1.48E-10 |
| CEP95    | -0.29664 | 1.49E-10 |
| DHX8     | -0.31069 | 1.51E-10 |
| GPBP1    | -0.30894 | 1.52E-10 |
| ZSCAN26  | 0.619153 | 1.55E-10 |
| SGCB     | 0.387354 | 1.56E-10 |
| ZFH3     | 0.416922 | 1.57E-10 |
| LSG1     | -0.22135 | 1.59E-10 |
| KLHL42   | 0.298549 | 1.67E-10 |
| RAB6B    | 0.664362 | 1.68E-10 |
| DOLPP1   | -0.29469 | 1.71E-10 |
| TTPA     | 0.601003 | 1.72E-10 |
| TMEM229  | 1.723375 | 1.74E-10 |
| KPNA4    | -0.23566 | 1.76E-10 |
| DGCR14   | -0.38962 | 1.78E-10 |
| C9orf114 | -0.33317 | 1.82E-10 |
| DPYSL2   | 0.272054 | 1.83E-10 |
| FNDC1    | 1.534582 | 1.84E-10 |
| DDA1     | -0.27234 | 1.87E-10 |
| DUS3L    | -0.25424 | 1.87E-10 |
| HSPA12A  | 0.679406 | 1.99E-10 |
| DCUN1D3  | -0.59942 | 2.02E-10 |
| FAM53C   | -0.24509 | 2.02E-10 |
| HNRNPM   | -0.23929 | 2.02E-10 |
| SLC35A2  | -0.40229 | 2.05E-10 |

|           |          |          |
|-----------|----------|----------|
| HNRNPL    | -0.23932 | 2.06E-10 |
| GPBP1L1   | -0.32863 | 2.08E-10 |
| NUDT11    | 0.985937 | 2.09E-10 |
| RNF19B    | -0.4555  | 2.17E-10 |
| SNHG12    | -0.47198 | 2.21E-10 |
| NEDD4     | 0.308159 | 2.23E-10 |
| LOC646762 | 0.416955 | 2.24E-10 |
| CHRM4     | 1.382039 | 2.24E-10 |
| ZNF324    | -0.77574 | 2.25E-10 |
| RNF149    | 0.356778 | 2.27E-10 |
| PRPF4     | -0.36416 | 2.35E-10 |
| CACHD1    | 0.37988  | 2.40E-10 |
| FKBP14    | 0.427715 | 2.43E-10 |
| ATF3      | -0.24777 | 2.48E-10 |
| SMG5      | -0.2778  | 2.65E-10 |
| SNHG15    | -0.27655 | 2.66E-10 |
| CDH3      | 1.459145 | 2.67E-10 |
| PRPF6     | -0.26009 | 2.70E-10 |
| TRAFD1    | -0.29826 | 2.73E-10 |
| MAPKAPK5  | -0.35531 | 2.73E-10 |
| DCTN5     | -0.26995 | 2.73E-10 |
| GPR1      | 1.935143 | 2.73E-10 |
| ZFAS1     | -0.30157 | 2.76E-10 |
| ZNF302    | 0.349406 | 2.76E-10 |
| DPP9      | -0.2643  | 2.76E-10 |
| EFNA3     | 1.424547 | 2.78E-10 |
| SPSB1     | 0.59317  | 2.80E-10 |
| SETD2     | -0.29949 | 2.82E-10 |
| ARHGEF37  | 1.171909 | 2.84E-10 |
| ZBTB7B    | -0.33019 | 2.86E-10 |
| SOX9      | -0.27423 | 2.90E-10 |
| TMEM185F  | 0.351478 | 2.91E-10 |
| NOP2      | -0.24021 | 3.00E-10 |
| BBC3      | -0.60801 | 3.06E-10 |
| ATP8B1    | -0.24145 | 3.14E-10 |
| SRRM2     | -0.32116 | 3.17E-10 |
| ZFP36     | -0.56925 | 3.17E-10 |
| RAI2      | 1.500118 | 3.29E-10 |
| TSSC4     | -0.4241  | 3.41E-10 |
| C1orf74   | 0.693549 | 3.42E-10 |
| SAMD4A    | 1.409138 | 3.44E-10 |
| IGFBP7    | 1.261195 | 3.48E-10 |
| LPCAT2    | 0.607785 | 3.48E-10 |
| NKX2-1    | 0.783405 | 3.54E-10 |
| POLR3D    | -0.28752 | 3.54E-10 |
| RNF182    | 1.975742 | 3.56E-10 |
| ZFAND2A   | -0.60568 | 3.58E-10 |

|           |          |          |
|-----------|----------|----------|
| PIGB      | 0.562729 | 3.67E-10 |
| PRKAG2    | 0.959847 | 3.68E-10 |
| DLST      | -0.24463 | 3.68E-10 |
| TBC1D17   | -0.55187 | 3.71E-10 |
| TLE3      | -0.27796 | 3.83E-10 |
| SLC35G1   | 1.011194 | 3.91E-10 |
| KIAA2013  | -0.28283 | 3.92E-10 |
| PDLIM1    | 0.573716 | 3.96E-10 |
| GTF2H1    | -0.32376 | 3.97E-10 |
| STX11     | 1.632177 | 4.02E-10 |
| GNPDA2    | 0.564753 | 4.10E-10 |
| C4orf19   | 0.86573  | 4.16E-10 |
| TMEM132F  | 0.847774 | 4.20E-10 |
| MORF4L1   | -0.23296 | 4.28E-10 |
| HMG20A    | 0.253205 | 4.28E-10 |
| ATF2      | -0.29519 | 4.29E-10 |
| PISD      | -0.33661 | 4.55E-10 |
| FEZ1      | 0.704698 | 4.60E-10 |
| SLC25A3   | -0.21499 | 4.67E-10 |
| COIL      | -0.30472 | 4.73E-10 |
| RC3H2     | -0.34808 | 4.75E-10 |
| PRKCQ     | 0.820944 | 5.21E-10 |
| PRPF8     | -0.24693 | 5.27E-10 |
| HPS3      | 0.314374 | 5.29E-10 |
| SORL1     | 0.341131 | 5.33E-10 |
| RNF38     | -0.32181 | 5.40E-10 |
| TOX4      | -0.25018 | 5.40E-10 |
| OTUD5     | -0.2847  | 5.40E-10 |
| CDCA4     | -0.54281 | 5.41E-10 |
| LOC646903 | 1.155137 | 5.41E-10 |
| TBC1D1    | 0.407037 | 5.42E-10 |
| CENPL     | -0.35753 | 5.47E-10 |
| OSR2      | 0.862311 | 5.73E-10 |
| MAPK6     | -0.24862 | 5.83E-10 |
| SRPR      | -0.2597  | 5.86E-10 |
| SNRNP40   | -0.30413 | 5.86E-10 |
| FAM89B    | -0.3955  | 5.92E-10 |
| TAOK1     | -0.27545 | 5.93E-10 |
| MUL1      | -0.36757 | 5.94E-10 |
| KCNK1     | 0.872338 | 6.10E-10 |
| FXR2      | -0.28591 | 6.15E-10 |
| MAFA      | 0.856478 | 6.18E-10 |
| PDPR      | -0.31661 | 6.19E-10 |
| INPP1     | 1.005862 | 6.21E-10 |
| KIF20A    | -0.29092 | 6.26E-10 |
| QTRTD1    | -0.29385 | 6.27E-10 |
| ERMAP     | -0.39377 | 6.32E-10 |



|           |          |          |
|-----------|----------|----------|
| LRRCS9    | -0.22359 | 6.43E-10 |
| NPAT      | -0.3243  | 6.56E-10 |
| SERINC1   | -0.2565  | 6.57E-10 |
| PEG10     | 0.274191 | 6.57E-10 |
| CHD1      | -0.2446  | 6.59E-10 |
| CCNL2     | -0.65267 | 6.59E-10 |
| C12orf4   | -0.33388 | 6.66E-10 |
| RNF144A-A | 0.747903 | 6.68E-10 |
| PRR15     | 0.309141 | 6.84E-10 |
| SUPT4H1   | -0.23852 | 6.89E-10 |
| USP19     | -0.40772 | 6.90E-10 |
| FAM102B   | 0.859252 | 6.96E-10 |
| NABP1     | 0.454162 | 6.97E-10 |
| MAU2      | -0.33255 | 7.13E-10 |
| C19orf43  | -0.25511 | 7.17E-10 |
| EMBP1     | 0.917293 | 7.23E-10 |
| HMX1      | 1.050124 | 7.35E-10 |
| SLC10A4   | 1.051483 | 7.36E-10 |
| SNN       | 0.638469 | 7.36E-10 |
| KDM3A     | -0.25655 | 7.37E-10 |
| ASXL3     | 1.363219 | 7.41E-10 |
| CAMTA1    | 0.291531 | 7.51E-10 |
| POMZP3    | -0.55246 | 7.59E-10 |
| KIF18B    | -0.25629 | 7.63E-10 |
| FAM84B    | 0.280687 | 7.78E-10 |
| RBM4      | -0.36286 | 8.16E-10 |
| SDF2      | -0.31409 | 8.20E-10 |
| NUP160    | -0.22474 | 8.20E-10 |
| TNFRSF11A | 1.525469 | 8.21E-10 |
| TNFRSF1B  | 1.620227 | 8.30E-10 |
| ACSL5     | 1.038268 | 8.38E-10 |
| DPYSL3    | -0.20565 | 8.46E-10 |
| NUDT16L1  | -0.32758 | 8.49E-10 |
| AIM1      | 1.31447  | 8.57E-10 |
| ZNF503-AS | 0.544047 | 8.63E-10 |
| NTRK2     | 1.514393 | 8.73E-10 |
| HOXD1     | 1.446924 | 8.73E-10 |
| SERTAD2   | 0.407245 | 8.90E-10 |
| UBALD1    | -0.32746 | 9.04E-10 |
| VEZF1     | -0.28797 | 9.16E-10 |
| FOXA1     | 0.38245  | 9.64E-10 |
| PLEKHA2   | 0.339209 | 9.88E-10 |
| ZNF397    | 0.720552 | 9.88E-10 |
| LYPD1     | 1.361763 | 1.01E-09 |
| PPARGC1B  | 0.830712 | 1.03E-09 |
| ARF1      | -0.22054 | 1.04E-09 |
| CXorf57   | 0.446976 | 1.05E-09 |

|           |          |          |
|-----------|----------|----------|
| GSPT1     | -0.20879 | 1.06E-09 |
| LOC648987 | 1.167943 | 1.07E-09 |
| PES1      | -0.28012 | 1.08E-09 |
| HNRNPU    | -0.20226 | 1.11E-09 |
| ADO       | 0.353854 | 1.13E-09 |
| TAF5L     | -0.30307 | 1.13E-09 |
| MFSD6     | 0.562913 | 1.13E-09 |
| HEG1      | 0.316277 | 1.13E-09 |
| DNAJC18   | 0.42323  | 1.14E-09 |
| NARF      | -0.42061 | 1.16E-09 |
| RAB3B     | -0.28358 | 1.16E-09 |
| GPR83     | 1.520255 | 1.17E-09 |
| ZNF200    | -0.37954 | 1.22E-09 |
| ATXN1L    | -0.29496 | 1.22E-09 |
| CDS1      | 0.485009 | 1.23E-09 |
| PTBP1     | -0.2421  | 1.26E-09 |
| LOC399815 | 0.937151 | 1.26E-09 |
| ADORA2B   | 1.129763 | 1.30E-09 |
| AK6       | -0.36733 | 1.31E-09 |
| STX3      | 0.454255 | 1.31E-09 |
| TAF5      | -0.47111 | 1.36E-09 |
| SREBF1    | -0.26047 | 1.39E-09 |
| HILPDA    | 0.937885 | 1.39E-09 |
| CABYR     | 0.298116 | 1.49E-09 |
| BTBD7     | -0.30429 | 1.50E-09 |
| HMGXB3    | -0.23658 | 1.50E-09 |
| WDR55     | -0.29012 | 1.50E-09 |
| ZNF559    | 0.566449 | 1.52E-09 |
| TAF2      | -0.2495  | 1.54E-09 |
| ZBTB41    | 0.401613 | 1.55E-09 |
| CMTR2     | 0.4189   | 1.58E-09 |
| KPNA1     | -0.24233 | 1.59E-09 |
| DLX3      | 0.439382 | 1.61E-09 |
| PTPN21    | 0.929064 | 1.61E-09 |
| GRWD1     | -0.29139 | 1.63E-09 |
| SLFN5     | 0.366475 | 1.63E-09 |
| MME       | 0.421117 | 1.63E-09 |
| ZFYVE26   | -0.35671 | 1.66E-09 |
| SCAMP1-A  | 1.085896 | 1.70E-09 |
| FAM171B   | 0.672595 | 1.73E-09 |
| MED10     | -0.30555 | 1.75E-09 |
| TSPAN13   | 0.295744 | 1.80E-09 |
| TAF13     | -0.63798 | 1.81E-09 |
| KCNJ11    | 0.932931 | 1.81E-09 |
| PSMC3     | -0.27029 | 1.85E-09 |
| KIAA2026  | -0.41033 | 1.85E-09 |
| HNRNPH3   | -0.21335 | 1.89E-09 |

|          |          |          |
|----------|----------|----------|
| ZNF410   | -0.32414 | 1.90E-09 |
| TBX3     | -0.26814 | 1.90E-09 |
| USP11    | -0.38444 | 1.92E-09 |
| THRAP3   | -0.21912 | 2.02E-09 |
| ATXN7L2  | -0.70981 | 2.02E-09 |
| IL6ST    | 0.593414 | 2.03E-09 |
| ATP6VOD1 | -0.28757 | 2.04E-09 |
| USP15    | -0.27478 | 2.04E-09 |
| PIGA     | -0.34212 | 2.05E-09 |
| MMACHC   | 0.321455 | 2.06E-09 |
| POLDIP2  | -0.22382 | 2.06E-09 |
| FBXO18   | -0.25781 | 2.07E-09 |
| SCG2     | 0.667831 | 2.07E-09 |
| KLHL24   | -0.37821 | 2.12E-09 |
| ANKRD50  | 0.47703  | 2.17E-09 |
| CYP2R1   | 1.123062 | 2.29E-09 |
| BCHE     | 0.755145 | 2.29E-09 |
| VLDLR    | 0.614584 | 2.29E-09 |
| C11orf84 | -0.26112 | 2.31E-09 |
| SMU1     | -0.24935 | 2.31E-09 |
| ZNF84    | 0.458881 | 2.34E-09 |
| MAP7D3   | 0.341366 | 2.37E-09 |
| AQR      | -0.24979 | 2.38E-09 |
| DR1      | -0.27162 | 2.41E-09 |
| ZNF195   | -0.34993 | 2.46E-09 |
| PARVG    | 0.593941 | 2.57E-09 |
| SESN3    | 0.336757 | 2.60E-09 |
| SLC1A5   | -0.23796 | 2.62E-09 |
| RCE1     | -0.37564 | 2.64E-09 |
| ZNF709   | 0.929363 | 2.65E-09 |
| EGR3     | 0.55494  | 2.68E-09 |
| GAREM    | 0.610511 | 2.73E-09 |
| TTC39C   | 0.441162 | 2.79E-09 |
| SF1      | -0.26553 | 2.84E-09 |
| IFT46    | 0.383493 | 2.88E-09 |
| CASC10   | 1.104784 | 2.94E-09 |
| IKBKG    | -0.33691 | 2.95E-09 |
| ZNF79    | -0.58209 | 2.98E-09 |
| ZNF189   | 0.438758 | 3.00E-09 |
| MAF      | 1.494552 | 3.03E-09 |
| ZNF605   | 0.557544 | 3.04E-09 |
| RNF111   | -0.31437 | 3.04E-09 |
| BEND4    | 0.836774 | 3.09E-09 |
| CBR4     | 0.391718 | 3.11E-09 |
| SUSD5    | 1.818633 | 3.13E-09 |
| CLDN23   | 1.488961 | 3.15E-09 |
| PTPDC1   | 0.559844 | 3.15E-09 |

|           |          |          |
|-----------|----------|----------|
| CLGN      | 0.726877 | 3.20E-09 |
| CBR1      | 0.320028 | 3.21E-09 |
| CDC20     | -0.21432 | 3.23E-09 |
| TPPP      | 1.256254 | 3.34E-09 |
| URB1      | -0.2276  | 3.38E-09 |
| SLC25A53  | 1.136038 | 3.38E-09 |
| IL22RA1   | 0.515765 | 3.39E-09 |
| GTSE1     | -0.25913 | 3.39E-09 |
| SCRN3     | 0.460163 | 3.41E-09 |
| UFD1L     | -0.26838 | 3.51E-09 |
| UNKL      | -0.36215 | 3.68E-09 |
| LETM1     | -0.26468 | 3.71E-09 |
| LUZP1     | 0.359768 | 3.73E-09 |
| SPG7      | -0.35106 | 3.85E-09 |
| MGC45800  | 0.963557 | 3.99E-09 |
| PMM2      | -0.24592 | 4.00E-09 |
| HAUS8     | -0.34009 | 4.02E-09 |
| CTDSPL2   | -0.23247 | 4.06E-09 |
| KIF18A    | -0.26082 | 4.09E-09 |
| SGPP1     | 0.428644 | 4.14E-09 |
| RAD21     | -0.21715 | 4.17E-09 |
| UBE4A     | -0.29508 | 4.27E-09 |
| MAP1A     | 0.909879 | 4.28E-09 |
| NASP      | -0.23702 | 4.31E-09 |
| HOXC10    | 0.355923 | 4.52E-09 |
| ERRFI1    | 0.478682 | 4.53E-09 |
| EPAS1     | 0.339455 | 4.63E-09 |
| ZNF180    | 0.529963 | 4.66E-09 |
| FOXI3     | 1.73102  | 4.69E-09 |
| DYRK2     | 0.498222 | 4.71E-09 |
| FAM174B   | 1.052965 | 4.72E-09 |
| NRF1      | -0.30281 | 4.74E-09 |
| PIM1      | -0.50983 | 4.81E-09 |
| FAM69A    | 0.342871 | 4.82E-09 |
| SYF2      | -0.33762 | 4.90E-09 |
| HDHD3     | 0.608159 | 4.99E-09 |
| ELOF1     | -0.35667 | 5.08E-09 |
| ZNF24     | -0.31323 | 5.08E-09 |
| LRRC37A6F | 1.643117 | 5.08E-09 |
| NCOA7     | 0.565487 | 5.19E-09 |
| PAFAH1B1  | -0.2475  | 5.20E-09 |
| IGHMBP2   | -0.33597 | 5.20E-09 |
| BCL2L11   | -0.39025 | 5.21E-09 |
| RBMS2     | 1.221396 | 5.21E-09 |
| RBM11     | 1.059836 | 5.21E-09 |
| NELFA     | -0.24816 | 5.23E-09 |
| VPS4B     | -0.27712 | 5.28E-09 |

|          |          |          |
|----------|----------|----------|
| EIF1AX   | -0.20453 | 5.34E-09 |
| RXRB     | -0.27715 | 5.35E-09 |
| SREK1    | -0.39371 | 5.36E-09 |
| HDX      | 0.599097 | 5.37E-09 |
| TRAPPC6B | -0.30031 | 5.37E-09 |
| EHD1     | -0.36331 | 5.41E-09 |
| RPL22L1  | -0.49809 | 5.41E-09 |
| IKZF5    | -0.44384 | 5.48E-09 |
| ATP6V1G1 | -0.30474 | 5.51E-09 |
| RBM34    | -0.29067 | 5.51E-09 |
| TNIP3    | 1.400874 | 5.56E-09 |
| TMEM194F | 0.747193 | 5.57E-09 |
| RAE1     | -0.24157 | 5.72E-09 |
| NSFL1C   | -0.24138 | 5.90E-09 |
| FBXL3    | -0.26432 | 5.91E-09 |
| C8orf33  | -0.2346  | 5.94E-09 |
| LIN7C    | -0.26503 | 5.96E-09 |
| LOC93622 | 0.37579  | 5.97E-09 |
| USP7     | -0.20894 | 6.17E-09 |
| KLHL11   | -0.4598  | 6.25E-09 |
| ZNF594   | 1.386089 | 6.36E-09 |
| NIFK     | -0.24394 | 6.37E-09 |
| ZNF227   | 0.338584 | 6.37E-09 |
| MTMR14   | -0.27899 | 6.59E-09 |
| SCNN1A   | -0.20151 | 6.59E-09 |
| MAP2K4   | -0.28199 | 6.61E-09 |
| SCAMP2   | -0.296   | 6.62E-09 |
| PGBD2    | 0.509947 | 6.71E-09 |
| DSG2     | 0.240894 | 6.72E-09 |
| RNF185   | -0.34108 | 6.84E-09 |
| DPP8     | -0.26288 | 6.88E-09 |
| ADNP     | -0.22824 | 7.05E-09 |
| ETV3     | -0.49042 | 7.05E-09 |
| ITGA2    | 0.590557 | 7.06E-09 |
| NUFIP2   | -0.28064 | 7.08E-09 |
| AKAP11   | 0.358103 | 7.08E-09 |
| GATAD2B  | -0.28367 | 7.08E-09 |
| TMEM127  | -0.34039 | 7.08E-09 |
| INPP5A   | -0.37056 | 7.19E-09 |
| MED4     | -0.2939  | 7.27E-09 |
| ZNF589   | 0.695809 | 7.34E-09 |
| ETV7     | 1.403266 | 7.35E-09 |
| DUSP19   | 1.142689 | 7.44E-09 |
| ARFGEF2  | -0.32555 | 7.50E-09 |
| PCAT1    | 1.77149  | 7.64E-09 |
| PKIB     | 1.175835 | 7.79E-09 |
| HEIH     | 0.430126 | 7.80E-09 |

|           |          |          |
|-----------|----------|----------|
| DAZAP2    | -0.23008 | 7.81E-09 |
| ACOX1     | -0.30232 | 7.93E-09 |
| ZNF490    | -0.51269 | 7.94E-09 |
| SUV39H1   | -0.35511 | 8.06E-09 |
| SAYSD1    | 0.819292 | 8.06E-09 |
| USP9X     | -0.27894 | 8.09E-09 |
| C8orf88   | 0.375336 | 8.24E-09 |
| MPV17L    | 0.434524 | 8.29E-09 |
| MSANTD4   | 0.335796 | 8.43E-09 |
| LINC00998 | 0.486685 | 8.44E-09 |
| HJURP     | -0.32626 | 8.45E-09 |
| TVP23B    | -0.52915 | 8.48E-09 |
| TMEM189   | -0.29055 | 8.73E-09 |
| CCDC59    | -0.23868 | 8.99E-09 |
| LONRF3    | 0.828424 | 9.01E-09 |
| UBE3B     | -0.34042 | 9.16E-09 |
| PDGFA     | 0.715027 | 9.18E-09 |
| FLNA      | -0.20161 | 9.18E-09 |
| ZCCHC10   | -0.30719 | 9.18E-09 |
| ZNF114    | 1.292074 | 9.19E-09 |
| RB1CC1    | -0.25978 | 9.20E-09 |
| MF12-AS1  | 1.364455 | 9.40E-09 |
| SPHK1     | 1.780012 | 9.40E-09 |
| PDE12     | -0.28278 | 9.49E-09 |
| C6orf222  | 1.53177  | 9.49E-09 |
| TRAM2-AS1 | 0.623176 | 9.68E-09 |
| SLC6A14   | 0.643189 | 9.68E-09 |
| BEST1     | 1.421401 | 9.72E-09 |
| RICTOR    | -0.31441 | 9.75E-09 |
| METTL2A   | -0.3196  | 9.75E-09 |
| C7orf43   | -0.49372 | 9.82E-09 |
| ABT1      | -0.35718 | 1.00E-08 |
| DLG5-AS1  | 1.795875 | 1.02E-08 |
| GCN1L1    | -0.2204  | 1.02E-08 |
| PDE3B     | 0.516172 | 1.05E-08 |
| HOXD10    | 1.538139 | 1.08E-08 |
| ENTHD2    | -0.41371 | 1.10E-08 |
| DNAJB4    | -0.47112 | 1.10E-08 |
| ZNF655    | -0.23287 | 1.11E-08 |
| ZCCHC18   | 1.40659  | 1.14E-08 |
| CCDC112   | 0.299002 | 1.16E-08 |
| MMD       | -0.2548  | 1.16E-08 |
| SAPCD2    | 0.353819 | 1.16E-08 |
| TCEAL8    | 0.340832 | 1.17E-08 |
| CROT      | 0.866712 | 1.17E-08 |
| ALYREF    | -0.23185 | 1.18E-08 |
| ZNF436    | 0.475584 | 1.19E-08 |

|          |          |          |
|----------|----------|----------|
| TAF6L    | -0.36884 | 1.19E-08 |
| AMMECR1  | 0.292061 | 1.19E-08 |
| GBF1     | -0.29243 | 1.20E-08 |
| LRFN3    | 1.604328 | 1.22E-08 |
| B3GNT4   | 1.329297 | 1.23E-08 |
| ZNF816   | 0.56313  | 1.24E-08 |
| CCNB1    | -0.24961 | 1.26E-08 |
| RAF1     | -0.23551 | 1.26E-08 |
| SAMD5    | 1.232431 | 1.27E-08 |
| JADE1    | 0.276704 | 1.27E-08 |
| ZNF772   | 1.250937 | 1.28E-08 |
| LRRC47   | -0.25521 | 1.29E-08 |
| KIAA1429 | -0.24437 | 1.29E-08 |
| TMEM62   | 0.316117 | 1.31E-08 |
| DLL4     | 0.731541 | 1.32E-08 |
| TUBB2B   | -0.20871 | 1.32E-08 |
| WIPI2    | -0.3272  | 1.34E-08 |
| FSD1L    | 0.626859 | 1.36E-08 |
| MKL1     | -0.31023 | 1.37E-08 |
| GPATCH1  | -0.41113 | 1.38E-08 |
| IK       | -0.20924 | 1.41E-08 |
| BRD4     | -0.30678 | 1.43E-08 |
| SESN2    | -0.3909  | 1.49E-08 |
| SRRM3    | 1.573049 | 1.50E-08 |
| CHMP1A   | -0.27785 | 1.52E-08 |
| HOXA3    | 0.668001 | 1.53E-08 |
| CLDN12   | 0.370571 | 1.59E-08 |
| KEAP1    | -0.2678  | 1.60E-08 |
| KLF16    | -0.32872 | 1.61E-08 |
| MIER3    | -0.26768 | 1.61E-08 |
| USP21    | -0.34795 | 1.62E-08 |
| NCKAP5L  | -0.3463  | 1.64E-08 |
| TMF1     | -0.39351 | 1.66E-08 |
| CLTC     | -0.21511 | 1.66E-08 |
| PLEKHG3  | 0.552956 | 1.66E-08 |
| UBR4     | -0.32462 | 1.66E-08 |
| RAD23B   | -0.20639 | 1.66E-08 |
| EDRF1    | -0.29585 | 1.66E-08 |
| SEC31A   | -0.2024  | 1.67E-08 |
| TDG      | -0.24098 | 1.69E-08 |
| ZMAT2    | -0.22635 | 1.71E-08 |
| PLEKHF1  | 1.151846 | 1.71E-08 |
| AMOTL2   | 0.283736 | 1.72E-08 |
| CALM2    | -0.22771 | 1.76E-08 |
| RNF170   | 0.538545 | 1.76E-08 |
| LPAR6    | 0.593843 | 1.81E-08 |
| RBM10    | -0.245   | 1.86E-08 |

|           |          |          |
|-----------|----------|----------|
| STIL      | -0.2429  | 1.89E-08 |
| DDX46     | -0.22305 | 1.91E-08 |
| CIR1      | -0.32177 | 1.91E-08 |
| BMP8B     | 0.454845 | 1.91E-08 |
| RAB3A     | 0.630586 | 1.92E-08 |
| SLC16A9   | 1.652661 | 1.99E-08 |
| PDE4A     | 1.544755 | 2.01E-08 |
| LOC101927 | 0.495677 | 2.04E-08 |
| C5orf22   | -0.25479 | 2.05E-08 |
| EDC3      | -0.23336 | 2.05E-08 |
| PRPF3     | -0.24403 | 2.06E-08 |
| GCC2      | -0.29143 | 2.07E-08 |
| HMGCR     | -0.25869 | 2.08E-08 |
| SP6       | 0.787993 | 2.11E-08 |
| POLR2C    | -0.24256 | 2.12E-08 |
| RPUSD2    | -0.36788 | 2.13E-08 |
| TOR1AIP2  | -0.25863 | 2.14E-08 |
| EN2       | 0.873503 | 2.15E-08 |
| EHD3      | 0.800944 | 2.16E-08 |
| THEMIS2   | 1.420935 | 2.18E-08 |
| EGR4      | 1.519771 | 2.19E-08 |
| DNTTIP1   | -0.29826 | 2.20E-08 |
| THAP6     | 0.474334 | 2.22E-08 |
| ATXN7L1   | 0.4939   | 2.24E-08 |
| TRMT44    | -0.51925 | 2.28E-08 |
| SSU72     | -0.24764 | 2.29E-08 |
| MAP3K11   | -0.35403 | 2.31E-08 |
| MINA      | 0.424004 | 2.31E-08 |
| NOL11     | -0.24904 | 2.31E-08 |
| C12orf76  | 0.65149  | 2.38E-08 |
| BAG6      | -0.20047 | 2.39E-08 |
| ZFP30     | 0.490186 | 2.40E-08 |
| RELA      | -0.27475 | 2.40E-08 |
| CYCS      | -0.20409 | 2.42E-08 |
| TMEM87A   | -0.23223 | 2.45E-08 |
| CHST15    | 0.344098 | 2.50E-08 |
| PUM1      | -0.24881 | 2.54E-08 |
| MTRFR2    | -0.44633 | 2.58E-08 |
| GCA       | 0.423477 | 2.60E-08 |
| EMC3-AS1  | 0.344869 | 2.63E-08 |
| CNBP      | -0.18795 | 2.65E-08 |
| WDR45B    | -0.24529 | 2.66E-08 |
| FAM32A    | -0.23951 | 2.66E-08 |
| TNFAIP8   | 0.68781  | 2.67E-08 |
| FUT1      | 0.766535 | 2.69E-08 |
| COPS3     | -0.27496 | 2.70E-08 |
| FBXL4     | 0.361541 | 2.70E-08 |



|           |          |          |
|-----------|----------|----------|
| SUB1      | -0.24477 | 2.74E-08 |
| THYN1     | 0.252925 | 2.76E-08 |
| TBPL1     | 0.282408 | 2.77E-08 |
| U2AF2     | -0.22797 | 2.82E-08 |
| CDC42SE2  | 0.278458 | 2.82E-08 |
| THBS1     | -0.2298  | 2.84E-08 |
| FOXO3B    | 0.680921 | 2.84E-08 |
| PDCD11    | -0.2357  | 2.85E-08 |
| TESK1     | -0.44592 | 2.86E-08 |
| PRTG      | 0.4658   | 2.93E-08 |
| EIF2S1    | -0.229   | 2.93E-08 |
| AKAP5     | 1.298503 | 2.97E-08 |
| DRG1      | -0.279   | 2.98E-08 |
| E2F5      | 0.417017 | 2.98E-08 |
| CITED4    | 0.612291 | 2.99E-08 |
| AMDHD1    | 1.614875 | 3.05E-08 |
| MAFK      | -0.35432 | 3.08E-08 |
| CNOT8     | -0.22676 | 3.10E-08 |
| RBMXL1    | 0.331914 | 3.11E-08 |
| LINC00649 | 0.66095  | 3.12E-08 |
| RNF103    | -0.28487 | 3.18E-08 |
| RNF166    | -0.38635 | 3.24E-08 |
| RHOV      | 0.790507 | 3.27E-08 |
| ANKRD40   | -0.23032 | 3.29E-08 |
| KDM5A     | -0.25468 | 3.30E-08 |
| LINC00265 | 0.603066 | 3.30E-08 |
| DBH-AS1   | 0.567776 | 3.32E-08 |
| GOLIM4    | -0.19832 | 3.35E-08 |
| THOP1     | -0.21416 | 3.39E-08 |
| CRNKL1    | -0.34554 | 3.44E-08 |
| FOXO6     | 0.747013 | 3.44E-08 |
| ZSWIM8    | -0.33531 | 3.46E-08 |
| PPP4C     | -0.23916 | 3.48E-08 |
| MAML1     | -0.2356  | 3.52E-08 |
| FAM198B   | 1.466475 | 3.52E-08 |
| ATP6V0A1  | 0.300675 | 3.61E-08 |
| RGCC      | 0.988436 | 3.66E-08 |
| CHGB      | 0.20542  | 3.68E-08 |
| USP10     | -0.20674 | 3.68E-08 |
| SMAD9     | 0.431865 | 3.70E-08 |
| PRRC2C    | -0.20984 | 3.70E-08 |
| GALNT1    | 0.246659 | 3.72E-08 |
| KRT8      | -0.2348  | 3.77E-08 |
| FUT4      | 0.402455 | 3.85E-08 |
| AFG3L2    | -0.24098 | 3.93E-08 |
| TYSND1    | 0.288033 | 3.96E-08 |
| KCMF1     | -0.23691 | 3.97E-08 |

|          |          |          |
|----------|----------|----------|
| LRCH1    | 0.614553 | 3.98E-08 |
| SLC1A4   | 0.310456 | 3.99E-08 |
| FLJ20021 | 0.857535 | 4.04E-08 |
| CHML     | 0.276629 | 4.05E-08 |
| DTL      | -0.23049 | 4.07E-08 |
| SH3BGRL  | 0.605213 | 4.08E-08 |
| GUCY1B3  | 1.709832 | 4.15E-08 |
| SOCS3    | 1.646876 | 4.15E-08 |
| USP16    | -0.26931 | 4.18E-08 |
| KAL1     | 1.384136 | 4.23E-08 |
| RTN4RL2  | 0.993998 | 4.23E-08 |
| JDP2     | 0.693508 | 4.27E-08 |
| ATL2     | -0.23652 | 4.28E-08 |
| JARID2   | 0.448191 | 4.30E-08 |
| APH1B    | 1.284384 | 4.44E-08 |
| PPM1G    | -0.2378  | 4.64E-08 |
| SLK      | 0.275135 | 4.66E-08 |
| ZNRF3    | -0.25408 | 4.69E-08 |
| EXOC3    | -0.36986 | 4.69E-08 |
| FZD3     | 0.42735  | 4.70E-08 |
| ZNF581   | -0.61159 | 4.77E-08 |
| ZNF516   | 0.55559  | 4.81E-08 |
| TMEM37   | 0.540751 | 4.91E-08 |
| ADIPOR2  | -0.20181 | 4.92E-08 |
| NOL10    | -0.25532 | 4.99E-08 |
| PALM3    | 0.801824 | 5.01E-08 |
| HOMER1   | 0.368604 | 5.08E-08 |
| UBIAD1   | -0.26458 | 5.09E-08 |
| SEC23IP  | -0.25271 | 5.17E-08 |
| SESTD1   | 0.26601  | 5.18E-08 |
| UBE2C    | -0.24827 | 5.20E-08 |
| GLS2     | 0.868798 | 5.23E-08 |
| ZNF563   | 0.881199 | 5.37E-08 |
| KDM6A    | -0.5799  | 5.52E-08 |
| YWHAH    | -0.22003 | 5.64E-08 |
| CHKA     | -0.27379 | 5.64E-08 |
| MAP1B    | 0.206343 | 5.68E-08 |
| TRIM68   | 0.726237 | 5.76E-08 |
| PITHD1   | -0.22276 | 5.76E-08 |
| BAG1     | -0.28156 | 5.87E-08 |
| SPPL3    | -0.33269 | 5.87E-08 |
| ORC1     | -0.26336 | 5.89E-08 |
| UNK      | -0.2321  | 5.93E-08 |
| SMURF2   | -0.42676 | 5.98E-08 |
| SHOC2    | -0.23989 | 6.04E-08 |
| MAP3K9   | -0.31752 | 6.06E-08 |
| FGFBP1   | 0.346328 | 6.12E-08 |

|           |          |          |
|-----------|----------|----------|
| ZNF746    | -0.35597 | 6.18E-08 |
| C17orf100 | 1.457434 | 6.24E-08 |
| FAM168B   | -0.19544 | 6.37E-08 |
| BHLHE22   | 1.487134 | 6.47E-08 |
| ALDH1B1   | 0.309958 | 6.47E-08 |
| FMN2      | 0.841236 | 6.61E-08 |
| BMS1      | -0.2096  | 6.65E-08 |
| SF3B2     | -0.18766 | 6.65E-08 |
| PHF20L1   | -0.24657 | 6.78E-08 |
| GGNBP2    | -0.24519 | 6.80E-08 |
| ZNF845    | -0.39663 | 6.82E-08 |
| CTDP1     | -0.3053  | 6.85E-08 |
| PRB3      | 1.105467 | 6.88E-08 |
| ZNF653    | -0.36522 | 6.90E-08 |
| NUFIP1    | -0.26966 | 6.92E-08 |
| PRPF38A   | -0.22137 | 6.96E-08 |
| TJAP1     | -0.30689 | 7.10E-08 |
| YWHAG     | -0.19701 | 7.12E-08 |
| QKI       | 0.247744 | 7.12E-08 |
| DNAJC11   | -0.21945 | 7.17E-08 |
| DNAJB11   | -0.19301 | 7.17E-08 |
| RPP38     | -0.31214 | 7.19E-08 |
| ZNF284    | 1.526615 | 7.27E-08 |
| DDX49     | -0.35714 | 7.41E-08 |
| HTR2C     | 0.666452 | 7.57E-08 |
| FOXJ3     | -0.19788 | 7.61E-08 |
| ABHD17C   | 0.349785 | 7.62E-08 |
| CUL3      | -0.20969 | 7.63E-08 |
| DDB1      | -0.18465 | 7.68E-08 |
| C6orf48   | -0.22932 | 8.10E-08 |
| DNAJB6    | -0.22806 | 8.14E-08 |
| STAU1     | -0.24251 | 8.14E-08 |
| SF3B3     | -0.18818 | 8.16E-08 |
| MARCKSL1  | -0.26767 | 8.33E-08 |
| PRPF40A   | -0.20269 | 8.38E-08 |
| FZD1      | 0.235795 | 8.42E-08 |
| HELZ2     | -0.3325  | 8.43E-08 |
| HFE       | 0.688503 | 8.57E-08 |
| NCOA6     | -0.22423 | 8.60E-08 |
| LOC653602 | 1.476605 | 8.60E-08 |
| LINGO1    | 0.369664 | 8.72E-08 |
| DPM1      | -0.2559  | 8.77E-08 |
| PIK3R4    | -0.26041 | 8.77E-08 |
| CDAN1     | -0.25748 | 8.77E-08 |
| ZFP3      | 0.729258 | 8.81E-08 |
| ESPN      | 0.790909 | 8.83E-08 |
| ZNF260    | 0.272812 | 8.88E-08 |

|          |          |          |
|----------|----------|----------|
| CKAP4    | 0.229823 | 8.89E-08 |
| PSMC2    | -0.23931 | 8.92E-08 |
| 9-Mar    | 0.596472 | 8.96E-08 |
| ZNF707   | -0.43841 | 8.98E-08 |
| PLA2G7   | 1.266723 | 9.03E-08 |
| CCNA2    | -0.25662 | 9.12E-08 |
| PDGFRA   | 1.395938 | 9.45E-08 |
| LDLRAP1  | 0.523774 | 9.46E-08 |
| ROBO1    | 0.392723 | 9.48E-08 |
| AHDC1    | 0.551645 | 9.50E-08 |
| ZSCAN16  | 0.523958 | 9.69E-08 |
| CSDE1    | -0.18644 | 9.96E-08 |
| PRDM10   | -0.43736 | 1.00E-07 |
| GLIS2    | 0.485552 | 1.02E-07 |
| LTN1     | -0.28604 | 1.02E-07 |
| GPR3     | 0.731429 | 1.02E-07 |
| GLTPD1   | -0.39655 | 1.03E-07 |
| CGN      | 0.512166 | 1.03E-07 |
| FAM86JP  | 1.339772 | 1.04E-07 |
| ZBTB1    | 0.263891 | 1.06E-07 |
| MYH14    | 0.272182 | 1.07E-07 |
| SEMA3F   | -0.23187 | 1.07E-07 |
| YIPF5    | -0.23854 | 1.10E-07 |
| GADD45B  | -0.29663 | 1.10E-07 |
| ZMYND8   | 0.223217 | 1.11E-07 |
| DNAJC16  | -0.34997 | 1.12E-07 |
| ZNF483   | 1.170089 | 1.14E-07 |
| HS1BP3   | 0.423543 | 1.14E-07 |
| ILDR2    | 0.763453 | 1.14E-07 |
| RUNX2    | 0.337456 | 1.15E-07 |
| FAM13B   | -0.29391 | 1.16E-07 |
| BEX5     | 0.927675 | 1.16E-07 |
| LIFR-AS1 | 1.565711 | 1.17E-07 |
| POLR3E   | -0.2219  | 1.18E-07 |
| ZHX2     | 0.44357  | 1.19E-07 |
| MON1B    | -0.25332 | 1.19E-07 |
| H3F3B    | -0.19905 | 1.21E-07 |
| EPHA7    | 1.143538 | 1.22E-07 |
| SYNCRIP  | -0.18559 | 1.23E-07 |
| SLC52A3  | 1.334257 | 1.23E-07 |
| BECN1    | -0.26194 | 1.25E-07 |
| RIC8A    | -0.26126 | 1.25E-07 |
| SPTLC1   | -0.27439 | 1.26E-07 |
| COPRS    | -0.22527 | 1.27E-07 |
| PGM5P2   | 0.875281 | 1.29E-07 |
| SENP6    | -0.21005 | 1.29E-07 |
| GPR126   | 0.4351   | 1.30E-07 |

|           |          |          |
|-----------|----------|----------|
| SPSB3     | -0.4072  | 1.34E-07 |
| TXNL4B    | -0.26347 | 1.34E-07 |
| DZIP1L    | 0.887359 | 1.34E-07 |
| RPUSD1    | -0.33902 | 1.37E-07 |
| NUP85     | -0.24281 | 1.37E-07 |
| PRDM15    | -0.32465 | 1.42E-07 |
| ARHGAP23  | 0.677842 | 1.42E-07 |
| H2AFJ     | 0.360478 | 1.45E-07 |
| EPB41L3   | 0.373622 | 1.45E-07 |
| CCDC12    | -0.37684 | 1.47E-07 |
| SAP18     | -0.26745 | 1.47E-07 |
| RSL1D1    | -0.23859 | 1.48E-07 |
| DDX19A    | -0.22078 | 1.50E-07 |
| RAD51AP2  | 1.475557 | 1.55E-07 |
| ADD3      | 0.286363 | 1.56E-07 |
| CTBP1-AS2 | 0.699142 | 1.56E-07 |
| TRAPPC8   | -0.27986 | 1.57E-07 |
| POLI      | 0.516347 | 1.60E-07 |
| NOSIP     | -0.29486 | 1.62E-07 |
| HDGFRP3   | 0.23198  | 1.62E-07 |
| SYAP1     | -0.22595 | 1.63E-07 |
| FEN1      | -0.21578 | 1.63E-07 |
| DUSP8     | -0.50084 | 1.63E-07 |
| ZNF264    | -0.30032 | 1.63E-07 |
| CPOX      | 0.402626 | 1.64E-07 |
| EEF2      | -0.17689 | 1.67E-07 |
| SLC25A12  | 0.272415 | 1.69E-07 |
| ARGLU1    | -0.22029 | 1.70E-07 |
| TWISTNB   | -0.26192 | 1.71E-07 |
| CTGF      | 0.769617 | 1.72E-07 |
| RHOF      | 0.591005 | 1.74E-07 |
| SBDSP1    | -0.28123 | 1.75E-07 |
| DHX37     | -0.23645 | 1.77E-07 |
| TM7SF3    | 0.276718 | 1.78E-07 |
| SLC6A8    | -0.26616 | 1.81E-07 |
| PXYLP1    | 0.354854 | 1.84E-07 |
| TMEM45A   | 1.196746 | 1.84E-07 |
| TRIM29    | 1.153028 | 1.84E-07 |
| SAMD1     | 0.254886 | 1.88E-07 |
| OXR1      | 0.329759 | 1.88E-07 |
| CEP104    | -0.29743 | 1.90E-07 |
| DPH7      | -0.35165 | 1.92E-07 |
| HECTD2    | 0.430528 | 1.92E-07 |
| FAM174A   | -0.46069 | 1.92E-07 |
| CMPK2     | 0.666115 | 1.94E-07 |
| NR1H2     | -0.34101 | 1.95E-07 |
| CXCL14    | -0.19752 | 1.95E-07 |

|            |          |          |
|------------|----------|----------|
| SOX21-AS1  | 0.435741 | 1.95E-07 |
| MAGEA4     | -0.19535 | 2.00E-07 |
| PSMD2      | -0.19772 | 2.00E-07 |
| PLEKHA8    | 0.395697 | 2.00E-07 |
| ALKBH1     | -0.32193 | 2.02E-07 |
| CMYA5      | 1.280125 | 2.07E-07 |
| ZNF473     | 0.36722  | 2.08E-07 |
| SNAPC4     | -0.33911 | 2.08E-07 |
| PPP6R3     | -0.21415 | 2.13E-07 |
| PAXIP1-AS1 | 0.521297 | 2.16E-07 |
| PTPN23     | -0.32342 | 2.17E-07 |
| ETNK1      | -0.2755  | 2.17E-07 |
| IWS1       | -0.24468 | 2.17E-07 |
| TBC1D8B    | 0.734747 | 2.17E-07 |
| TSC22D2    | -0.24825 | 2.19E-07 |
| SSX2IP     | 0.290129 | 2.21E-07 |
| HMGB2      | -0.19402 | 2.22E-07 |
| TEC        | 0.852948 | 2.23E-07 |
| 2-Mar      | 0.461965 | 2.23E-07 |
| ARHGAP1    | -0.27841 | 2.27E-07 |
| UBE2L3     | -0.21042 | 2.28E-07 |
| ZFYVE20    | -0.33109 | 2.29E-07 |
| PVR        | 0.272646 | 2.32E-07 |
| LYAR       | -0.21571 | 2.33E-07 |
| NADK       | -0.22326 | 2.35E-07 |
| TSEN15     | 0.280739 | 2.35E-07 |
| HACE1      | 0.514477 | 2.38E-07 |
| RAVER1     | -0.30928 | 2.40E-07 |
| STRN4      | -0.24317 | 2.41E-07 |
| SDAD1      | -0.3044  | 2.41E-07 |
| FAM149A    | 0.798543 | 2.41E-07 |
| UBQLN1     | -0.20671 | 2.45E-07 |
| CDH2       | 0.210357 | 2.47E-07 |
| MAP3K1     | -0.33862 | 2.49E-07 |
| CUL2       | -0.23325 | 2.50E-07 |
| POF1B      | 0.268266 | 2.50E-07 |
| NECAP2     | -0.22174 | 2.56E-07 |
| SLC8B1     | 1.09374  | 2.56E-07 |
| PAPD4      | -0.26303 | 2.59E-07 |
| SLC7A6OS   | -0.27849 | 2.61E-07 |
| PLEKHG5    | 0.702625 | 2.62E-07 |
| RIOK2      | -0.21987 | 2.62E-07 |
| ELAVL3     | 1.317332 | 2.62E-07 |
| ZNF48      | 0.325525 | 2.65E-07 |
| SARNP      | -0.2233  | 2.67E-07 |
| SNHG7      | -0.26716 | 2.70E-07 |
| LOC389641  | 0.549653 | 2.71E-07 |

|           |          |          |
|-----------|----------|----------|
| NFXL1     | 0.27537  | 2.75E-07 |
| PLLP      | 1.352036 | 2.79E-07 |
| MPZL1     | 0.200717 | 2.79E-07 |
| RFX4      | 1.314348 | 2.79E-07 |
| MIA3      | -0.21008 | 2.81E-07 |
| CASZ1     | 0.261019 | 2.85E-07 |
| FAM126A   | 0.31583  | 2.87E-07 |
| 6-Mar     | -0.25996 | 2.96E-07 |
| ALX4      | 0.274556 | 2.98E-07 |
| MBNL2     | 0.386893 | 2.99E-07 |
| COMMD7    | 0.292947 | 3.01E-07 |
| EPS8      | 0.282213 | 3.11E-07 |
| SBNO2     | -0.25114 | 3.12E-07 |
| VPS4A     | -0.21766 | 3.12E-07 |
| ATAD3B    | -0.3045  | 3.15E-07 |
| FGFR1OP2  | -0.34149 | 3.20E-07 |
| PPP6C     | -0.22715 | 3.23E-07 |
| PRDM2     | -0.20922 | 3.23E-07 |
| EIF2B2    | -0.2698  | 3.24E-07 |
| RNF6      | -0.25094 | 3.28E-07 |
| ATP13A1   | -0.29625 | 3.28E-07 |
| CEND1     | 0.900613 | 3.28E-07 |
| LOC102724 | 0.347609 | 3.32E-07 |
| OXCT2     | 0.849376 | 3.33E-07 |
| ZMYM3     | 0.242807 | 3.34E-07 |
| FGFR1OP   | -0.2565  | 3.39E-07 |
| PTPRU     | 0.396575 | 3.43E-07 |
| LINC01144 | 0.99648  | 3.47E-07 |
| PCYOX1L   | 0.317308 | 3.52E-07 |
| RUNX1     | -0.19135 | 3.55E-07 |
| DCTN4     | -0.1981  | 3.58E-07 |
| ASB8      | -0.33205 | 3.59E-07 |
| PPCS      | 0.240272 | 3.61E-07 |
| LINC00641 | -1.04334 | 3.67E-07 |
| PGBD1     | 0.46758  | 3.69E-07 |
| GPN2      | -0.32861 | 3.71E-07 |
| TMEM79    | -0.47221 | 3.72E-07 |
| TMTC3     | 0.259481 | 3.73E-07 |
| ITGA5     | 1.012479 | 3.74E-07 |
| ZNF646    | 0.285394 | 3.74E-07 |
| TRMT1L    | 0.257744 | 3.82E-07 |
| E2F4      | -0.26758 | 3.82E-07 |
| CPEB1     | 0.714708 | 3.83E-07 |
| LIG4      | 0.391485 | 3.85E-07 |
| HINFP     | -0.35945 | 3.90E-07 |
| EXOSC4    | -0.29202 | 3.91E-07 |
| RNF145    | 0.260401 | 3.96E-07 |

|           |          |          |
|-----------|----------|----------|
| CDK13     | -0.26003 | 3.96E-07 |
| ZNF26     | -0.39196 | 4.03E-07 |
| ZNF619    | 0.64275  | 4.08E-07 |
| BTN2A2    | 0.320887 | 4.09E-07 |
| COX10     | -0.34621 | 4.14E-07 |
| PI4K2A    | -0.2643  | 4.14E-07 |
| YLPM1     | -0.22472 | 4.15E-07 |
| USF1      | -0.26145 | 4.15E-07 |
| CEP19     | 0.760089 | 4.16E-07 |
| L2HGDH    | 0.30941  | 4.17E-07 |
| FBXO16    | 0.605104 | 4.18E-07 |
| ZBTB8A    | 0.43594  | 4.21E-07 |
| KAZN      | 0.662212 | 4.23E-07 |
| VANGL1    | 0.320221 | 4.25E-07 |
| YIPF3     | -0.23267 | 4.27E-07 |
| EPB41L5   | 0.276084 | 4.33E-07 |
| ZNF787    | -0.27131 | 4.38E-07 |
| C11orf71  | 0.727234 | 4.41E-07 |
| NOD1      | 0.733047 | 4.41E-07 |
| GNL2      | -0.23233 | 4.42E-07 |
| ZFP36L2   | 0.33017  | 4.48E-07 |
| PCBP1     | -0.21413 | 4.56E-07 |
| SH3BP5    | 0.357517 | 4.57E-07 |
| LOC113230 | 0.401041 | 4.63E-07 |
| DAXX      | -0.22045 | 4.70E-07 |
| HLA-E     | 0.271249 | 4.71E-07 |
| CHST7     | 0.91923  | 4.73E-07 |
| RAB1A     | -0.24735 | 4.74E-07 |
| ADIPOR1   | -0.21666 | 4.75E-07 |
| ZBTB9     | -0.38757 | 4.77E-07 |
| ZNF254    | -0.57117 | 4.77E-07 |
| LIN9      | -0.27403 | 4.79E-07 |
| C14orf169 | 0.490136 | 4.83E-07 |
| CRLF3     | 0.245118 | 4.88E-07 |
| RACGAP1   | -0.19212 | 4.92E-07 |
| C1RL      | 0.555057 | 4.93E-07 |
| CWC15     | -0.25526 | 4.97E-07 |
| DCSTAMP   | 1.350804 | 5.08E-07 |
| NCK1-AS1  | 0.603694 | 5.08E-07 |
| NEAT1     | 1.461589 | 5.10E-07 |
| GDAP1     | 0.240899 | 5.12E-07 |
| NVL       | -0.21766 | 5.13E-07 |
| GTF2A1    | -0.23471 | 5.15E-07 |
| HLA-B     | 0.404115 | 5.25E-07 |
| LDOC1L    | 0.201007 | 5.27E-07 |
| ALKBH5    | -0.2355  | 5.31E-07 |
| SLC9A1    | -0.30418 | 5.32E-07 |



|          |          |          |
|----------|----------|----------|
| WDR1     | -0.20342 | 5.34E-07 |
| SLC35E4  | 0.905545 | 5.35E-07 |
| TNPO2    | -0.19198 | 5.39E-07 |
| ZNF160   | -0.3512  | 5.39E-07 |
| BCL10    | -0.43475 | 5.41E-07 |
| KLHL18   | -0.33286 | 5.41E-07 |
| CYYR1    | 0.338094 | 5.43E-07 |
| FRRS1    | 0.934185 | 5.43E-07 |
| SNAP47   | -0.27823 | 5.44E-07 |
| PPP1R37  | -0.3324  | 5.45E-07 |
| KHSRP    | -0.21801 | 5.51E-07 |
| TIGD6    | 0.545937 | 5.64E-07 |
| HAS2-AS1 | 1.182159 | 5.77E-07 |
| SMC1A    | -0.20903 | 5.88E-07 |
| MAGT1    | -0.18931 | 5.90E-07 |
| SS18L1   | -0.30293 | 5.93E-07 |
| SP3      | -0.19656 | 5.93E-07 |
| PMPCA    | -0.23282 | 5.95E-07 |
| CENPBD1  | 0.526968 | 6.02E-07 |
| KAT7     | -0.2027  | 6.05E-07 |
| RBM8A    | -0.19265 | 6.06E-07 |
| TBC1D10A | -0.62411 | 6.08E-07 |
| CHMP7    | -0.21923 | 6.08E-07 |
| GMPR     | 0.405179 | 6.09E-07 |
| NAGPA    | -0.41373 | 6.15E-07 |
| MTRF1L   | -0.22133 | 6.28E-07 |
| RPF2     | -0.2146  | 6.29E-07 |
| ZMYND19  | -0.28043 | 6.30E-07 |
| TCF25    | -0.21098 | 6.35E-07 |
| NUAK1    | 0.295755 | 6.36E-07 |
| ZNF347   | 1.108404 | 6.38E-07 |
| C1orf109 | -0.225   | 6.39E-07 |
| COBL     | 0.249402 | 6.39E-07 |
| GPCPD1   | 0.264318 | 6.41E-07 |
| PAG1     | 0.697345 | 6.41E-07 |
| FBXL18   | -0.23972 | 6.48E-07 |
| OGFRL1   | 0.393381 | 6.58E-07 |
| DHRS2    | 1.415711 | 6.63E-07 |
| EIF4H    | -0.17407 | 6.68E-07 |
| XRN1     | -0.257   | 6.74E-07 |
| CHORDC1  | -0.21984 | 6.77E-07 |
| EID3     | 0.482637 | 6.81E-07 |
| DST      | 0.248702 | 6.82E-07 |
| WWTR1    | 0.241694 | 6.84E-07 |
| SIMC1    | 0.397588 | 6.91E-07 |
| PLD1     | 1.073012 | 6.93E-07 |
| PTPN3    | 0.521264 | 6.93E-07 |

|           |          |          |
|-----------|----------|----------|
| YAP1      | 0.268105 | 6.97E-07 |
| PLA2G4A   | 1.250364 | 7.01E-07 |
| NAA30     | -0.2033  | 7.01E-07 |
| IQCH      | 0.255921 | 7.03E-07 |
| PARP2     | -0.25803 | 7.05E-07 |
| C11orf30  | -0.27648 | 7.05E-07 |
| HSPA4     | -0.18912 | 7.09E-07 |
| NIPA1     | 0.225977 | 7.14E-07 |
| KDM1B     | 0.321019 | 7.17E-07 |
| CENPB     | 0.267213 | 7.20E-07 |
| LRIG2     | 0.323976 | 7.22E-07 |
| ATG4B     | -0.21527 | 7.24E-07 |
| LOC101929 | 1.003685 | 7.30E-07 |
| FNIP2     | 0.66603  | 7.32E-07 |
| CSRNP2    | -0.21586 | 7.41E-07 |
| MKRN2     | -0.20737 | 7.42E-07 |
| NLRX1     | 0.473853 | 7.60E-07 |
| CAB39     | -0.21831 | 7.60E-07 |
| ZNF791    | -0.28861 | 7.61E-07 |
| FUBP1     | -0.21982 | 7.61E-07 |
| LRP5      | -0.22271 | 7.65E-07 |
| TBC1D15   | -0.31609 | 7.65E-07 |
| RAB14     | -0.23159 | 7.66E-07 |
| HIPK1     | -0.25498 | 7.68E-07 |
| SF3A1     | -0.23565 | 7.69E-07 |
| EIF2B1    | -0.19832 | 7.70E-07 |
| DZIP1     | 0.319697 | 7.81E-07 |
| HIF1A     | -0.1978  | 7.81E-07 |
| RNPS1     | -0.17825 | 7.90E-07 |
| SLC5A3    | 0.545481 | 7.91E-07 |
| COPS5     | -0.21178 | 7.95E-07 |
| PDE5A     | 0.215066 | 8.08E-07 |
| ERMP1     | 0.275598 | 8.12E-07 |
| NPTXR     | 0.436138 | 8.35E-07 |
| CHODL     | 0.881885 | 8.36E-07 |
| ZPR1      | -0.29499 | 8.41E-07 |
| RHOB      | -0.21579 | 8.53E-07 |
| BPGM      | -0.23213 | 8.60E-07 |
| ARNT2     | 0.273098 | 8.77E-07 |
| SCML2     | 0.285782 | 8.80E-07 |
| NFKBIL1   | -0.42777 | 8.81E-07 |
| CCRN4L    | -0.36041 | 8.82E-07 |
| HBS1L     | -0.22567 | 8.98E-07 |
| STX12     | -0.30687 | 9.00E-07 |
| CCDC86    | -0.20007 | 9.01E-07 |
| HTT       | -0.24508 | 9.09E-07 |
| SLCO5A1   | 1.447055 | 9.16E-07 |

|           |          |          |
|-----------|----------|----------|
| C6orf223  | 0.327122 | 9.45E-07 |
| SNHG17    | -0.26647 | 9.47E-07 |
| HS3ST3B1  | 0.640294 | 9.52E-07 |
| CXorf40B  | -0.3617  | 9.57E-07 |
| FLNB      | 0.303053 | 9.58E-07 |
| SKP1      | -0.19599 | 9.73E-07 |
| STRIP1    | -0.25826 | 9.75E-07 |
| EWSR1     | -0.18    | 9.78E-07 |
| HOXA6     | 1.477235 | 9.86E-07 |
| LHX4      | 1.157082 | 1.01E-06 |
| ADM       | 0.373259 | 1.01E-06 |
| NDUFS3    | -0.24515 | 1.01E-06 |
| FAM134C   | -0.24656 | 1.02E-06 |
| DCLRE1B   | 0.37409  | 1.03E-06 |
| POLE3     | -0.22978 | 1.04E-06 |
| UBE3A     | -0.19665 | 1.04E-06 |
| SPAG1     | 0.317259 | 1.04E-06 |
| TMEM168   | 0.527593 | 1.05E-06 |
| BFSP1     | 1.214473 | 1.05E-06 |
| SUPT16H   | -0.18668 | 1.08E-06 |
| KIF13A    | 0.380118 | 1.08E-06 |
| LEO1      | -0.20318 | 1.09E-06 |
| RECK      | 0.904454 | 1.10E-06 |
| LACTB2    | 0.352211 | 1.10E-06 |
| HBP1      | -0.42397 | 1.12E-06 |
| SF3A3     | -0.19339 | 1.12E-06 |
| PTPRO     | 0.215189 | 1.13E-06 |
| PRKCQ-AS1 | 0.857757 | 1.14E-06 |
| USP20     | -0.33303 | 1.16E-06 |
| UTP20     | -0.23068 | 1.16E-06 |
| PPP1R32   | -0.71684 | 1.17E-06 |
| ABHD6     | 0.551771 | 1.17E-06 |
| ATP2A2    | -0.17527 | 1.18E-06 |
| PIP4K2B   | -0.22443 | 1.18E-06 |
| HPCAL4    | 0.885956 | 1.18E-06 |
| IRF2BP2   | -0.20205 | 1.18E-06 |
| PSME3     | -0.18189 | 1.18E-06 |
| KRT19     | -0.20638 | 1.19E-06 |
| CCAT1     | 0.651911 | 1.20E-06 |
| FCF1      | -0.28086 | 1.22E-06 |
| ADNP2     | -0.25557 | 1.22E-06 |
| ENDOD1    | 0.551462 | 1.24E-06 |
| SBF1      | -0.21727 | 1.25E-06 |
| SOX2-OT   | 0.420603 | 1.25E-06 |
| GSTM3     | 0.457475 | 1.26E-06 |
| ARHGAP5-1 | 1.26955  | 1.26E-06 |
| TTC9C     | -0.30983 | 1.27E-06 |

|           |          |          |
|-----------|----------|----------|
| SPRED2    | -0.24396 | 1.29E-06 |
| C2orf88   | 1.343298 | 1.31E-06 |
| ARID5A    | -0.51613 | 1.31E-06 |
| NEURL4    | -0.33062 | 1.31E-06 |
| ZBTB6     | -0.36569 | 1.31E-06 |
| SGMS1     | 0.464441 | 1.31E-06 |
| GEMIN8P4  | 0.803443 | 1.32E-06 |
| ZMPSTE24  | -0.18036 | 1.33E-06 |
| DCAF7     | -0.19742 | 1.34E-06 |
| RNFT1     | 0.489952 | 1.36E-06 |
| OTUD6B-A' | 0.241138 | 1.36E-06 |
| SCOC      | 0.360454 | 1.37E-06 |
| NRDE2     | -0.30138 | 1.37E-06 |
| RAB23     | 0.26308  | 1.37E-06 |
| DEGS2     | 1.177133 | 1.39E-06 |
| TMEM41B   | -0.29136 | 1.39E-06 |
| AKT3      | 0.484638 | 1.41E-06 |
| UBTF      | -0.23707 | 1.42E-06 |
| IGIP      | 1.105499 | 1.43E-06 |
| LOC101928 | 0.759555 | 1.43E-06 |
| GOLPH3L   | -0.28642 | 1.44E-06 |
| ENTPD8    | 0.59511  | 1.45E-06 |
| PLEKHO1   | 0.471728 | 1.45E-06 |
| FLJ37453  | 0.729035 | 1.47E-06 |
| RUFY1     | -0.19515 | 1.49E-06 |
| KIF11     | -0.19031 | 1.49E-06 |
| DLX6      | 0.328529 | 1.50E-06 |
| NANS      | -0.20496 | 1.50E-06 |
| DUSP26    | 1.311282 | 1.50E-06 |
| PANK4     | -0.26666 | 1.51E-06 |
| ADAM17    | -0.28429 | 1.52E-06 |
| RAET1K    | 0.872686 | 1.53E-06 |
| CHST6     | 1.091547 | 1.54E-06 |
| ARHGAP18  | 0.399208 | 1.54E-06 |
| CPA2      | 0.355227 | 1.54E-06 |
| RBM27     | -0.21815 | 1.55E-06 |
| COPA      | -0.17134 | 1.56E-06 |
| ENAH      | 0.194089 | 1.56E-06 |
| MRFAP1    | -0.16947 | 1.59E-06 |
| REG1A     | 0.236458 | 1.61E-06 |
| PDLIM3    | 0.248402 | 1.61E-06 |
| POLR2B    | -0.21593 | 1.62E-06 |
| SWAP70    | 0.345407 | 1.64E-06 |
| TUBGCP5   | 0.218185 | 1.66E-06 |
| ZNF362    | 0.406761 | 1.67E-06 |
| KDM4B     | -0.23592 | 1.67E-06 |
| NFKBIZ    | -0.59472 | 1.69E-06 |

|           |          |          |
|-----------|----------|----------|
| RNF2      | 0.273281 | 1.70E-06 |
| LOC100507 | 1.054745 | 1.70E-06 |
| GAS2L1    | 0.650983 | 1.71E-06 |
| ZNF45     | 0.334655 | 1.71E-06 |
| ANKFY1    | -0.21489 | 1.71E-06 |
| MOB1B     | 0.351471 | 1.71E-06 |
| B4GALT1   | 0.36512  | 1.72E-06 |
| PSMB2     | -0.21439 | 1.73E-06 |
| SETX      | -0.23798 | 1.75E-06 |
| LTV1      | -0.21277 | 1.75E-06 |
| ADAMTS18  | 0.223748 | 1.75E-06 |
| IER3      | 0.449102 | 1.75E-06 |
| IFIH1     | 0.450468 | 1.75E-06 |
| VDAC2     | -0.23189 | 1.76E-06 |
| DDX55     | -0.22883 | 1.78E-06 |
| SLC26A2   | 0.547529 | 1.80E-06 |
| FGFBP3    | 0.79819  | 1.81E-06 |
| CCDC157   | -0.60387 | 1.81E-06 |
| RBM23     | -0.19935 | 1.82E-06 |
| MSANTD2   | -0.40943 | 1.86E-06 |
| PAIP2     | -0.19311 | 1.86E-06 |
| TRIP12    | -0.2353  | 1.86E-06 |
| TTC17     | -0.23996 | 1.88E-06 |
| TIMM17A   | -0.18999 | 1.89E-06 |
| SDHAP2    | -0.68926 | 1.90E-06 |
| RNF216P1  | 0.363925 | 1.91E-06 |
| ZNF142    | -0.25647 | 1.92E-06 |
| SEMA4F    | 0.439181 | 1.92E-06 |
| C18orf54  | 0.466971 | 1.95E-06 |
| CELSR3    | 0.463229 | 1.96E-06 |
| ELOVL1    | -0.20716 | 1.97E-06 |
| PCGF1     | -0.31708 | 2.00E-06 |
| PPP4R1    | 0.269449 | 2.03E-06 |
| PAQR3     | 0.262472 | 2.03E-06 |
| PEX14     | -0.24789 | 2.03E-06 |
| ADAMTS12  | 0.416016 | 2.04E-06 |
| ZNF699    | 0.728276 | 2.04E-06 |
| C2orf47   | -0.2948  | 2.08E-06 |
| PMS1      | 0.241811 | 2.08E-06 |
| ASAP2     | 0.267754 | 2.08E-06 |
| TUBB      | -0.16263 | 2.08E-06 |
| KCNE4     | 0.353652 | 2.09E-06 |
| DMXL2     | 0.223441 | 2.10E-06 |
| RBMX      | -0.17875 | 2.11E-06 |
| PPP6R2    | -0.268   | 2.11E-06 |
| ZBTB48    | -0.28877 | 2.15E-06 |
| NIPBL     | -0.20731 | 2.17E-06 |

|           |          |          |
|-----------|----------|----------|
| RNF11     | -0.25106 | 2.18E-06 |
| MCF2L-AS1 | 0.890514 | 2.18E-06 |
| ATP2B4    | 0.497843 | 2.21E-06 |
| TRIM4     | -0.28919 | 2.22E-06 |
| CUL5      | -0.2268  | 2.23E-06 |
| HYOU1     | -0.17355 | 2.23E-06 |
| REV3L     | -0.21055 | 2.26E-06 |
| STIP1     | -0.1731  | 2.27E-06 |
| TPX2      | -0.17622 | 2.27E-06 |
| SNRNP70   | -0.2457  | 2.27E-06 |
| PAQR8     | 0.45063  | 2.29E-06 |
| RNF138    | -0.24456 | 2.33E-06 |
| BACH1     | -0.33905 | 2.33E-06 |
| ARFGAP1   | -0.24639 | 2.34E-06 |
| DIS3      | -0.19262 | 2.35E-06 |
| C1orf174  | -0.41169 | 2.39E-06 |
| ACBD4     | 0.428217 | 2.40E-06 |
| UPF2      | -0.21734 | 2.42E-06 |
| BCKDHA    | -0.24453 | 2.43E-06 |
| TMEM212   | 0.695233 | 2.43E-06 |
| MSL1      | -0.23768 | 2.45E-06 |
| MRTO4     | -0.19746 | 2.46E-06 |
| MADD      | -0.18679 | 2.46E-06 |
| SOX8      | 0.438257 | 2.46E-06 |
| C1orf27   | -0.24103 | 2.47E-06 |
| GLI3      | 1.306462 | 2.48E-06 |
| CTBS      | 0.63232  | 2.49E-06 |
| OGDH      | -0.18866 | 2.49E-06 |
| SNRK      | -0.25051 | 2.51E-06 |
| PDCD6     | -0.23428 | 2.53E-06 |
| ZNF484    | 0.525297 | 2.54E-06 |
| ARL6IP5   | 0.434137 | 2.55E-06 |
| MAP2K3    | -0.2638  | 2.56E-06 |
| SPAG5     | -0.17716 | 2.57E-06 |
| ASNA1     | -0.23112 | 2.58E-06 |
| MLF1      | 0.433909 | 2.59E-06 |
| RBBP8     | 0.229816 | 2.60E-06 |
| ENTPD1    | 0.378316 | 2.60E-06 |
| ONECUT2   | 1.107591 | 2.63E-06 |
| ZNF540    | 1.694898 | 2.66E-06 |
| NUP133    | -0.21994 | 2.70E-06 |
| RAB21     | -0.24197 | 2.71E-06 |
| PNPO      | 0.256823 | 2.71E-06 |
| PRRC2B    | -0.20941 | 2.74E-06 |
| SEC24C    | -0.2151  | 2.74E-06 |
| MAP3K7    | -0.20723 | 2.77E-06 |
| CREBRF    | -0.65589 | 2.77E-06 |

|          |          |          |
|----------|----------|----------|
| CDK17    | 0.27994  | 2.77E-06 |
| C7orf26  | -0.24809 | 2.79E-06 |
| COPB2    | -0.19772 | 2.82E-06 |
| TLR3     | 1.146377 | 2.84E-06 |
| TMED2    | -0.17893 | 2.87E-06 |
| CHD5     | 0.585777 | 2.88E-06 |
| TUBGCP2  | -0.23844 | 2.90E-06 |
| BAZ2A    | -0.23035 | 2.92E-06 |
| TBRG4    | -0.23282 | 2.93E-06 |
| LRPPRC   | -0.17825 | 2.94E-06 |
| SQRDL    | 0.531437 | 2.95E-06 |
| ZNF292   | -0.23538 | 2.96E-06 |
| USP25    | 0.310027 | 2.96E-06 |
| CCAR2    | -0.20186 | 2.97E-06 |
| RAB8B    | 0.565343 | 2.98E-06 |
| BLOC1S3  | -0.6306  | 2.98E-06 |
| GDPGP1   | 1.190629 | 2.99E-06 |
| BAP1     | -0.21944 | 3.01E-06 |
| MTMR3    | -0.30261 | 3.01E-06 |
| ESRRG    | 0.843855 | 3.03E-06 |
| HOXD11   | 0.96279  | 3.03E-06 |
| MCM7     | -0.17726 | 3.05E-06 |
| GLUL     | -0.17037 | 3.09E-06 |
| SASS6    | -0.26755 | 3.09E-06 |
| SMYD4    | 0.316451 | 3.10E-06 |
| CDKN1C   | 0.865519 | 3.12E-06 |
| TEX15    | 0.507189 | 3.21E-06 |
| HNRNPUL1 | -0.16899 | 3.23E-06 |
| CABLES1  | 0.575378 | 3.27E-06 |
| NAB1     | 0.323946 | 3.27E-06 |
| ZER1     | -0.28523 | 3.28E-06 |
| CEP76    | -0.39839 | 3.29E-06 |
| SERPINB1 | 0.299953 | 3.30E-06 |
| NPL      | 1.205015 | 3.33E-06 |
| ZNF391   | 0.679254 | 3.34E-06 |
| C1orf50  | -0.27761 | 3.35E-06 |
| FOSB     | -0.76774 | 3.36E-06 |
| ZNF318   | 0.223296 | 3.38E-06 |
| KIF5C    | 0.215518 | 3.40E-06 |
| SLC17A5  | 0.399002 | 3.48E-06 |
| BIN3     | -0.30545 | 3.49E-06 |
| SH3PXD2B | 0.207358 | 3.55E-06 |
| NSL1     | 0.243358 | 3.56E-06 |
| ZNF395   | 0.415629 | 3.57E-06 |
| BCL7B    | -0.2104  | 3.57E-06 |
| WSB1     | -0.22153 | 3.57E-06 |
| NCKIPSD  | 0.324568 | 3.60E-06 |

|                      |          |          |
|----------------------|----------|----------|
| ARAP2                | 1.097043 | 3.70E-06 |
| ZNF717               | 0.468046 | 3.70E-06 |
| PRPF39               | -0.25079 | 3.73E-06 |
| MCM3AP- <del>l</del> | 1.0225   | 3.74E-06 |
| ARCN1                | -0.17227 | 3.75E-06 |
| TUT1                 | -0.26573 | 3.78E-06 |
| MEIS3                | 1.149094 | 3.79E-06 |
| MOBP                 | 0.466586 | 3.80E-06 |
| CSNK2A1              | -0.18077 | 3.83E-06 |
| TOM1L1               | 0.205597 | 3.88E-06 |
| KATNAL1              | 0.50905  | 3.89E-06 |
| ZFP91                | -0.18281 | 3.90E-06 |
| ZNF510               | 0.411091 | 3.94E-06 |
| CEBPZ                | -0.22849 | 3.99E-06 |
| CHAF1A               | -0.1779  | 3.99E-06 |
| GOLT1B               | -0.25229 | 4.02E-06 |
| HPSE                 | 0.988536 | 4.06E-06 |
| WBP5                 | 0.26053  | 4.08E-06 |
| MASTL                | -0.25634 | 4.11E-06 |
| ZNF805               | -0.43515 | 4.13E-06 |
| RDH10                | -0.34801 | 4.19E-06 |
| MPI                  | 0.268901 | 4.24E-06 |
| PTPN1                | -0.23578 | 4.24E-06 |
| FAS                  | 1.29781  | 4.26E-06 |
| ATF7IP2              | 0.575162 | 4.27E-06 |
| HAUS3                | -0.28938 | 4.27E-06 |
| BAG2                 | 0.195442 | 4.29E-06 |
| CEP97                | 0.310964 | 4.29E-06 |
| MAGI1                | 0.346336 | 4.32E-06 |
| GLTSCR2              | -0.19093 | 4.32E-06 |
| BET1L                | -0.21149 | 4.33E-06 |
| AP1B1                | -0.21909 | 4.33E-06 |
| ZNF383               | -0.43774 | 4.38E-06 |
| CTLA4                | 0.839404 | 4.40E-06 |
| FBXO43               | 0.999674 | 4.42E-06 |
| PSMC1                | -0.18154 | 4.44E-06 |
| KANSL1               | -0.19443 | 4.44E-06 |
| LINC01206            | 1.301123 | 4.46E-06 |
| APAF1                | 0.310045 | 4.46E-06 |
| ZNFX1                | -0.46683 | 4.46E-06 |
| DLG3                 | 0.248747 | 4.48E-06 |
| SEC14L5              | 1.094775 | 4.53E-06 |
| EPT1                 | -0.22852 | 4.55E-06 |
| KLHL5                | 0.421411 | 4.61E-06 |
| BIRC6                | -0.21562 | 4.65E-06 |
| RAD50                | 0.204123 | 4.65E-06 |
| RER1                 | -0.21432 | 4.70E-06 |



|           |          |          |
|-----------|----------|----------|
| H2AFY2    | 0.264297 | 4.72E-06 |
| TNPO3     | -0.18952 | 4.74E-06 |
| SURF4     | -0.19238 | 4.80E-06 |
| PNO1      | -0.2018  | 4.94E-06 |
| ANXA4     | 0.293888 | 5.03E-06 |
| ST7-AS1   | 1.005251 | 5.05E-06 |
| EXOSC10   | -0.17947 | 5.08E-06 |
| TMEM45B   | 0.190692 | 5.09E-06 |
| WDR53     | -0.29159 | 5.10E-06 |
| IMPDH2    | -0.19498 | 5.12E-06 |
| CKAP2L    | -0.21409 | 5.12E-06 |
| TBCEL     | -0.31577 | 5.14E-06 |
| SLC25A33  | -0.25605 | 5.19E-06 |
| PLK4      | -0.21691 | 5.26E-06 |
| FAM73B    | -0.48275 | 5.26E-06 |
| ZNF74     | 0.484986 | 5.31E-06 |
| SERPINE2  | 0.665237 | 5.33E-06 |
| NR4A2     | 0.880853 | 5.37E-06 |
| TAF3      | -0.20964 | 5.37E-06 |
| CSGALNAC  | 0.289294 | 5.41E-06 |
| AFAP1L2   | 0.246047 | 5.43E-06 |
| MAST3     | 0.555444 | 5.49E-06 |
| LPPR5     | 1.082659 | 5.51E-06 |
| PDIA3P1   | 0.802345 | 5.57E-06 |
| ORAOV1    | -0.26161 | 5.64E-06 |
| LOC101927 | 0.952014 | 5.68E-06 |
| TCP1      | -0.20639 | 5.83E-06 |
| L3HYPDH   | 0.50075  | 5.85E-06 |
| GPATCH2   | -0.24105 | 5.90E-06 |
| KDF1      | 0.704928 | 5.92E-06 |
| NKD1      | -0.18103 | 5.95E-06 |
| TNFAIP8L3 | 0.232621 | 6.06E-06 |
| FARP2     | -0.3641  | 6.07E-06 |
| CROCCP2   | -0.34514 | 6.10E-06 |
| FAM117A   | -0.31133 | 6.11E-06 |
| RAD21-AS1 | 0.47928  | 6.11E-06 |
| SYNGR3    | 0.414731 | 6.14E-06 |
| DNAJC9    | -0.17839 | 6.21E-06 |
| PWWP2A    | -0.21017 | 6.23E-06 |
| KBTBD3    | 0.808506 | 6.23E-06 |
| ZNF780B   | 0.634838 | 6.26E-06 |
| NBPF3     | 0.688939 | 6.34E-06 |
| ACTB      | -0.24364 | 6.35E-06 |
| NBN       | 0.201562 | 6.40E-06 |
| PPP1R8    | -0.20475 | 6.44E-06 |
| SLC7A5    | -0.1979  | 6.44E-06 |
| YEATS2    | 0.181214 | 6.46E-06 |

|           |          |          |
|-----------|----------|----------|
| LONRF2    | 0.390037 | 6.60E-06 |
| ULK1      | -0.33069 | 6.61E-06 |
| MED7      | 0.429537 | 6.69E-06 |
| FXR1      | -0.17426 | 6.73E-06 |
| KCTD15    | 0.287076 | 6.73E-06 |
| C7orf25   | 0.477531 | 6.75E-06 |
| PHF1      | -0.32866 | 6.81E-06 |
| ING2      | -0.42723 | 6.83E-06 |
| CEP68     | 0.271555 | 6.85E-06 |
| IGFBP2    | 0.255582 | 6.95E-06 |
| YKT6      | -0.19021 | 6.96E-06 |
| TNKS2     | -0.19553 | 6.96E-06 |
| EIF3J-AS1 | 0.391904 | 6.99E-06 |
| ERCC6L2   | -0.22091 | 7.01E-06 |
| TMEM60    | 0.604006 | 7.01E-06 |
| SHC1      | -0.23433 | 7.04E-06 |
| ATL3      | 0.401715 | 7.05E-06 |
| ALDH1A1   | 0.246806 | 7.06E-06 |
| MOGS      | -0.2053  | 7.09E-06 |
| PARP9     | 0.484419 | 7.12E-06 |
| SNX16     | 0.413238 | 7.24E-06 |
| SHPRH     | 0.243713 | 7.28E-06 |
| LETM2     | 0.405519 | 7.30E-06 |
| PIGP      | 0.332212 | 7.39E-06 |
| ADAP2     | 1.224342 | 7.43E-06 |
| BTBD3     | 0.376661 | 7.45E-06 |
| POLR2D    | -0.18129 | 7.47E-06 |
| FBXL16    | 0.683162 | 7.49E-06 |
| MIS12     | -0.20923 | 7.62E-06 |
| RINT1     | -0.22876 | 7.63E-06 |
| ACAA2     | -0.16427 | 7.64E-06 |
| FERMT2    | 0.223212 | 7.67E-06 |
| MYH9      | -0.16364 | 7.68E-06 |
| FIZ1      | -0.36627 | 7.70E-06 |
| ZC3H15    | -0.17062 | 7.71E-06 |
| DHRS4-AS1 | 0.339513 | 7.73E-06 |
| TRAM2     | 0.210137 | 7.75E-06 |
| GPRC5B    | 0.198062 | 7.77E-06 |
| MIOS      | 0.315733 | 7.81E-06 |
| SLC7A8    | 0.30619  | 7.84E-06 |
| TGS1      | -0.19239 | 7.88E-06 |
| RARS      | -0.17892 | 7.90E-06 |
| ZNF280B   | 0.744723 | 7.92E-06 |
| IGF2R     | -0.21434 | 7.94E-06 |
| ZNF222    | 0.436691 | 7.94E-06 |
| TMEM65    | 0.464612 | 7.95E-06 |
| DOT1L     | -0.26886 | 7.96E-06 |

|           |          |          |
|-----------|----------|----------|
| CDH8      | 0.571086 | 7.99E-06 |
| NUP88     | -0.20073 | 8.08E-06 |
| ELAVL1    | -0.17553 | 8.09E-06 |
| WLS       | 0.345596 | 8.11E-06 |
| SYDE2     | 1.07103  | 8.13E-06 |
| AKR1E2    | 0.4271   | 8.17E-06 |
| M6PR      | -0.19055 | 8.23E-06 |
| CAPZA1    | -0.18936 | 8.24E-06 |
| H6PD      | 0.372639 | 8.28E-06 |
| NR1D2     | -0.24178 | 8.34E-06 |
| PNPLA5    | 0.45702  | 8.34E-06 |
| KHDRBS1   | -0.17162 | 8.38E-06 |
| ACOT11    | 0.860516 | 8.43E-06 |
| BNIP1     | -0.28756 | 8.46E-06 |
| CCDC14    | 0.223626 | 8.47E-06 |
| AGA       | 0.421151 | 8.52E-06 |
| ACACB     | 0.342133 | 8.57E-06 |
| RNF19A    | -0.30764 | 8.62E-06 |
| CCNG1     | -0.192   | 8.62E-06 |
| ADRBK2    | 0.335505 | 8.68E-06 |
| SMAD6     | 0.33065  | 8.71E-06 |
| AP4B1     | 0.389095 | 8.74E-06 |
| AR        | 0.355138 | 8.76E-06 |
| BBS7      | 0.304913 | 8.79E-06 |
| RNPEP     | 0.192517 | 8.81E-06 |
| TMTC4     | 0.34814  | 8.81E-06 |
| SGPP2     | 0.994826 | 8.85E-06 |
| RBPJ      | -0.19701 | 8.89E-06 |
| CHD8      | -0.19667 | 8.98E-06 |
| NR4A1     | -0.2991  | 9.04E-06 |
| SRA1      | -0.19463 | 9.06E-06 |
| IRAK1BP1  | 0.58488  | 9.15E-06 |
| ARHGEF7   | -0.21803 | 9.40E-06 |
| USP14     | -0.20577 | 9.41E-06 |
| LOC100131 | 0.544967 | 9.42E-06 |
| PGM2      | 0.209052 | 9.44E-06 |
| ISCU      | -0.20942 | 9.58E-06 |
| KDELC1    | 0.388788 | 9.62E-06 |
| PAPD7     | -0.22053 | 9.66E-06 |
| MRM1      | 0.258529 | 9.68E-06 |
| EIF6      | -0.20287 | 9.68E-06 |
| CEP290    | 0.244239 | 9.68E-06 |
| FAM111A   | 0.452394 | 9.75E-06 |
| PIAS1     | -0.23653 | 9.77E-06 |
| KCTD6     | 0.535145 | 1.00E-05 |
| LINC00525 | 0.540139 | 1.00E-05 |
| ACTRT3    | 0.728218 | 1.01E-05 |

|           |          |          |
|-----------|----------|----------|
| STARD5    | 0.704865 | 1.01E-05 |
| HSP90AB1  | -0.15551 | 1.01E-05 |
| RAC1      | -0.15703 | 1.01E-05 |
| UBE2S     | -0.18379 | 1.02E-05 |
| TRIAP1    | -0.24914 | 1.02E-05 |
| DDX47     | -0.20317 | 1.02E-05 |
| ARIH2     | -0.22919 | 1.03E-05 |
| DIXDC1    | 0.467947 | 1.03E-05 |
| RAB11FIP1 | -0.16691 | 1.03E-05 |
| SIRPA     | 0.478166 | 1.03E-05 |
| LOC101927 | 0.990451 | 1.04E-05 |
| MLLT10    | 0.238451 | 1.05E-05 |
| ARHGEF18  | -0.22342 | 1.05E-05 |
| UBE2D3    | -0.16666 | 1.05E-05 |
| PITPNB    | -0.17947 | 1.05E-05 |
| PDK3      | 0.54517  | 1.05E-05 |
| CREB1     | -0.22677 | 1.05E-05 |
| MMGT1     | -0.20578 | 1.06E-05 |
| TARBP2    | -0.28179 | 1.06E-05 |
| BSDC1     | -0.19351 | 1.06E-05 |
| NFKBIB    | -0.20367 | 1.07E-05 |
| LAMP1     | -0.17475 | 1.07E-05 |
| MTOR      | -0.18312 | 1.07E-05 |
| XK        | 1.175253 | 1.07E-05 |
| RPUSD4    | -0.23306 | 1.09E-05 |
| ZNF720    | -0.27896 | 1.09E-05 |
| KBTBD2    | -0.20441 | 1.09E-05 |
| POP7      | -0.2148  | 1.09E-05 |
| LINC00963 | 0.748307 | 1.10E-05 |
| PHF5A     | -0.20416 | 1.10E-05 |
| PIGC      | 0.356161 | 1.11E-05 |
| SEL1L     | -0.24023 | 1.11E-05 |
| TLR2      | 1.041559 | 1.13E-05 |
| GGA3      | -0.26226 | 1.13E-05 |
| TRMT10C   | -0.23935 | 1.13E-05 |
| ATP6VOC   | -0.31718 | 1.13E-05 |
| ECD       | -0.21156 | 1.13E-05 |
| FNBP1L    | 0.218414 | 1.14E-05 |
| SMC4      | -0.15798 | 1.14E-05 |
| IL27RA    | 0.36453  | 1.14E-05 |
| CPNE8     | 0.272893 | 1.15E-05 |
| GPR160    | 0.641446 | 1.15E-05 |
| PANK3     | 0.186657 | 1.16E-05 |
| WDR44     | 0.488288 | 1.16E-05 |
| UTP3      | -0.2221  | 1.18E-05 |
| CASP4     | 0.64961  | 1.18E-05 |
| DCLRE1C   | -0.30377 | 1.18E-05 |

|          |          |          |
|----------|----------|----------|
| SLC9B2   | 0.464697 | 1.18E-05 |
| SSBP2    | 0.790414 | 1.18E-05 |
| SLC4A1AP | -0.21239 | 1.19E-05 |
| PAK6     | 0.622879 | 1.19E-05 |
| YWHAZ    | -0.15239 | 1.21E-05 |
| IL17RD   | 0.417183 | 1.21E-05 |
| PSMD14   | -0.20319 | 1.22E-05 |
| CREG1    | 0.245783 | 1.24E-05 |
| GAPVD1   | -0.20841 | 1.24E-05 |
| SMG1     | -0.22524 | 1.24E-05 |
| LMX1B    | 1.123509 | 1.25E-05 |
| ACTG1    | -0.22261 | 1.25E-05 |
| NDNL2    | 0.240529 | 1.25E-05 |
| OVGP1    | -0.54398 | 1.27E-05 |
| FAM58A   | -0.24507 | 1.27E-05 |
| C2orf44  | 0.265216 | 1.27E-05 |
| RFX1     | -0.40975 | 1.29E-05 |
| RPS6KA6  | 0.598117 | 1.30E-05 |
| FARSA    | -0.177   | 1.30E-05 |
| DCAF15   | -0.21119 | 1.31E-05 |
| DDX18    | -0.18565 | 1.33E-05 |
| THAP4    | -0.21825 | 1.34E-05 |
| DSE      | 0.727949 | 1.34E-05 |
| TMEM177  | 0.476794 | 1.35E-05 |
| ZNF32    | 0.493635 | 1.37E-05 |
| GOLGA5   | -0.25283 | 1.37E-05 |
| TMEM248  | -0.21331 | 1.39E-05 |
| ANKRD17  | -0.19257 | 1.39E-05 |
| SLC30A5  | -0.20414 | 1.40E-05 |
| DDX51    | -0.25492 | 1.40E-05 |
| TNFRSF21 | 0.274877 | 1.40E-05 |
| MIR4697H | 1.300428 | 1.41E-05 |
| TCF15    | 0.853809 | 1.42E-05 |
| BLCAP    | -0.22873 | 1.43E-05 |
| ZNF33B   | 0.358012 | 1.45E-05 |
| MBTD1    | -0.25764 | 1.45E-05 |
| SMPD4    | -0.17073 | 1.45E-05 |
| LHX4-AS1 | 0.753166 | 1.45E-05 |
| PWWP2B   | 0.723762 | 1.45E-05 |
| PUS7L    | 0.317027 | 1.46E-05 |
| RAB7A    | -0.15457 | 1.46E-05 |
| PTRH2    | -0.22807 | 1.47E-05 |
| TFAM     | -0.16842 | 1.47E-05 |
| SYT6     | 0.806141 | 1.49E-05 |
| FAM214A  | -0.33413 | 1.50E-05 |
| DIABLO   | -0.19295 | 1.52E-05 |
| MRPL15   | -0.18695 | 1.53E-05 |

|           |          |          |
|-----------|----------|----------|
| LOC344887 | 0.301225 | 1.54E-05 |
| RRP15     | -0.18681 | 1.56E-05 |
| CXorf56   | -0.24924 | 1.57E-05 |
| OGDHL     | 0.482574 | 1.58E-05 |
| IL4R      | 0.876576 | 1.58E-05 |
| RAD54B    | 0.250027 | 1.59E-05 |
| OPRK1     | 0.832528 | 1.59E-05 |
| PATL1     | -0.18764 | 1.59E-05 |
| CAPN15    | -0.31499 | 1.60E-05 |
| SPR       | 0.360053 | 1.61E-05 |
| KLHL14    | 1.200601 | 1.62E-05 |
| ZNF354C   | 0.349937 | 1.63E-05 |
| NUP107    | -0.21071 | 1.65E-05 |
| ZNF25     | 0.449875 | 1.69E-05 |
| KIAA1468  | -0.20866 | 1.69E-05 |
| CCDC126   | 0.682645 | 1.69E-05 |
| KIDINS220 | -0.18223 | 1.72E-05 |
| DNAJC8    | -0.21564 | 1.72E-05 |
| PEX16     | -0.28543 | 1.74E-05 |
| KIAA2022  | 0.484462 | 1.75E-05 |
| CRY1      | -0.28135 | 1.77E-05 |
| C12orf57  | -0.21759 | 1.77E-05 |
| N4BP1     | -0.18104 | 1.81E-05 |
| TES       | 0.303861 | 1.81E-05 |
| CLPTM1    | -0.20524 | 1.81E-05 |
| PURA      | 0.231573 | 1.81E-05 |
| VWDE      | 0.478172 | 1.82E-05 |
| ZNF644    | -0.17328 | 1.82E-05 |
| HSPA13    | -0.228   | 1.83E-05 |
| LRRCC1    | 0.302535 | 1.83E-05 |
| SH3BP4    | -0.16955 | 1.84E-05 |
| LMTK2     | -0.24185 | 1.85E-05 |
| USP13     | 0.183906 | 1.85E-05 |
| CALM1     | -0.17018 | 1.87E-05 |
| CDK9      | -0.22213 | 1.87E-05 |
| FEM1B     | -0.19477 | 1.88E-05 |
| ARL8B     | -0.17607 | 1.88E-05 |
| SAMD4B    | -0.19153 | 1.88E-05 |
| SOD2      | -0.19383 | 1.90E-05 |
| KIAA1279  | -0.19616 | 1.92E-05 |
| ZNF337    | 0.404477 | 1.92E-05 |
| XYLT2     | 0.336879 | 1.94E-05 |
| GPR107    | -0.17946 | 1.95E-05 |
| C1orf56   | 0.631412 | 1.98E-05 |
| PUF60     | -0.19186 | 1.98E-05 |
| PDGFC     | 0.535404 | 2.00E-05 |
| EIF4ENIF1 | -0.2339  | 2.02E-05 |

|           |          |          |
|-----------|----------|----------|
| RARB      | 0.703458 | 2.03E-05 |
| TUBA1B    | -0.15989 | 2.06E-05 |
| PSMB1     | -0.15755 | 2.06E-05 |
| PELI1     | 0.212224 | 2.07E-05 |
| PPIL4     | -0.26033 | 2.08E-05 |
| METTL16   | -0.229   | 2.09E-05 |
| TDRP      | 0.380525 | 2.10E-05 |
| CDON      | 0.529496 | 2.10E-05 |
| DDX24     | -0.16593 | 2.10E-05 |
| RPS19BP1  | -0.17392 | 2.13E-05 |
| DGKG      | 0.334127 | 2.14E-05 |
| BROX      | -0.20119 | 2.15E-05 |
| C2orf15   | 0.4447   | 2.15E-05 |
| RNF44     | -0.21866 | 2.18E-05 |
| DNAJC7    | -0.16095 | 2.18E-05 |
| APCDD1    | 0.232803 | 2.19E-05 |
| KIF3A     | 0.345335 | 2.22E-05 |
| BIRC5     | -0.21516 | 2.22E-05 |
| TRIP4     | -0.24591 | 2.26E-05 |
| KIF24     | -0.26939 | 2.27E-05 |
| SACS      | 0.2961   | 2.28E-05 |
| EHBP1L1   | -0.53728 | 2.32E-05 |
| FOXD1     | 0.323177 | 2.33E-05 |
| DDX27     | -0.18274 | 2.34E-05 |
| ST3GAL2   | 0.410748 | 2.35E-05 |
| KCTD18    | 0.383204 | 2.36E-05 |
| GNAI3     | -0.18348 | 2.37E-05 |
| C2orf49   | -0.23409 | 2.38E-05 |
| SLFN12    | 0.678339 | 2.39E-05 |
| YWHAB     | -0.17428 | 2.43E-05 |
| IBA57     | -0.22864 | 2.45E-05 |
| GPR124    | 0.758336 | 2.50E-05 |
| NSRP1     | -0.17665 | 2.50E-05 |
| BRMS1     | -0.22956 | 2.50E-05 |
| IRAK2     | 0.28113  | 2.50E-05 |
| PLEKHB2   | -0.19642 | 2.50E-05 |
| GHITM     | -0.16318 | 2.53E-05 |
| CWC22     | -0.18192 | 2.55E-05 |
| PUS1      | -0.24315 | 2.56E-05 |
| RAD54L2   | -0.35282 | 2.57E-05 |
| NCBP2-AS2 | -0.27337 | 2.60E-05 |
| CHMP1B    | -0.24884 | 2.60E-05 |
| CHST3     | 0.73635  | 2.61E-05 |
| ERCC6L    | 0.289421 | 2.61E-05 |
| OSBPL3    | 0.274274 | 2.63E-05 |
| ZNF226    | 0.321444 | 2.64E-05 |
| LRRC49    | 0.269726 | 2.65E-05 |

|           |          |          |
|-----------|----------|----------|
| DROSHA    | -0.17815 | 2.65E-05 |
| C19orf44  | 0.402232 | 2.66E-05 |
| POLR3A    | -0.18415 | 2.67E-05 |
| DAB2IP    | 0.364034 | 2.67E-05 |
| TMBIM6    | -0.1734  | 2.72E-05 |
| ESAM      | 0.786584 | 2.72E-05 |
| URB2      | -0.24286 | 2.73E-05 |
| UBA2      | -0.16785 | 2.74E-05 |
| SH3GL1    | -0.16559 | 2.75E-05 |
| RTKN2     | 0.236604 | 2.77E-05 |
| UBA1      | -0.16098 | 2.79E-05 |
| BTG3      | 0.199205 | 2.79E-05 |
| TWF1      | -0.1964  | 2.79E-05 |
| KIF3C     | 0.290836 | 2.84E-05 |
| MAP2K7    | -0.18063 | 2.88E-05 |
| TPD52L2   | -0.18529 | 2.88E-05 |
| ZFP41     | 0.38363  | 2.88E-05 |
| ZNF2      | -0.3645  | 2.91E-05 |
| ASH2L     | -0.17171 | 2.94E-05 |
| ZNF891    | 0.942884 | 2.96E-05 |
| ELP5      | -0.21823 | 2.97E-05 |
| SLC30A7   | -0.34476 | 2.99E-05 |
| STK35     | -0.22266 | 3.00E-05 |
| DNMT1     | -0.14538 | 3.01E-05 |
| BCAS2     | -0.20245 | 3.01E-05 |
| BFAR      | -0.2524  | 3.01E-05 |
| PHC3      | -0.20333 | 3.01E-05 |
| AQP11     | 1.262413 | 3.02E-05 |
| PAK2      | -0.15651 | 3.03E-05 |
| CSNK2A2   | -0.24624 | 3.05E-05 |
| TMEM144   | 0.836962 | 3.05E-05 |
| AP2M1     | -0.14558 | 3.05E-05 |
| FBXO32    | -0.53739 | 3.06E-05 |
| PSMB4     | -0.15094 | 3.07E-05 |
| LOC100506 | 0.870365 | 3.08E-05 |
| LOC284023 | 0.988332 | 3.10E-05 |
| ZNF592    | -0.1935  | 3.11E-05 |
| NLRC5     | 0.609025 | 3.11E-05 |
| EMC1      | -0.18855 | 3.12E-05 |
| ALAS1     | -0.26355 | 3.13E-05 |
| KBTBD4    | -0.28207 | 3.13E-05 |
| LHX1      | 0.36971  | 3.13E-05 |
| CKMT1A    | 0.793554 | 3.14E-05 |
| RAVER2    | 0.42758  | 3.18E-05 |
| PRNP      | 0.225316 | 3.19E-05 |
| TOMM40    | -0.16555 | 3.19E-05 |
| MAPK13    | 0.216646 | 3.20E-05 |



|           |          |          |
|-----------|----------|----------|
| SNX25     | -0.18613 | 3.20E-05 |
| TIMM50    | -0.19246 | 3.21E-05 |
| SLC25A21- | 1.156064 | 3.21E-05 |
| MLF2      | -0.16097 | 3.22E-05 |
| IRAK4     | 0.378024 | 3.23E-05 |
| CCNC      | -0.1829  | 3.24E-05 |
| CYP1B1    | 0.344676 | 3.27E-05 |
| FCHO2     | 0.351216 | 3.28E-05 |
| CDC42     | -0.17535 | 3.28E-05 |
| FZD9      | 0.581953 | 3.29E-05 |
| SCYL2     | -0.18483 | 3.29E-05 |
| KIAA1377  | 0.815682 | 3.31E-05 |
| CS        | -0.15524 | 3.31E-05 |
| TMEM39A   | -0.21987 | 3.31E-05 |
| NFATC1    | 1.021252 | 3.31E-05 |
| ATRIP     | -0.34738 | 3.33E-05 |
| C15orf41  | 0.310579 | 3.33E-05 |
| MMP15     | 0.668071 | 3.35E-05 |
| STK17B    | -0.26188 | 3.35E-05 |
| SCARNA12  | -0.93783 | 3.35E-05 |
| PLEK2     | 0.641388 | 3.35E-05 |
| CDC5L     | -0.17126 | 3.37E-05 |
| RNH1      | -0.22799 | 3.40E-05 |
| CCDC122   | 0.899147 | 3.41E-05 |
| GAD1      | 0.407203 | 3.45E-05 |
| TOP3A     | -0.23441 | 3.45E-05 |
| INO80D    | -0.40268 | 3.46E-05 |
| ZNF821    | 0.486019 | 3.46E-05 |
| ATL1      | 1.006151 | 3.47E-05 |
| TAPT1     | -0.21939 | 3.48E-05 |
| GRB2      | -0.20205 | 3.48E-05 |
| CLK4      | -0.28248 | 3.48E-05 |
| ASB16-AS1 | 0.4579   | 3.49E-05 |
| PIGG      | -0.18673 | 3.51E-05 |
| SLC25A36  | -0.16408 | 3.53E-05 |
| ZNF451    | -0.17152 | 3.57E-05 |
| MX1       | 0.500453 | 3.58E-05 |
| PITPNA    | -0.22551 | 3.58E-05 |
| ASCL5     | 0.953395 | 3.59E-05 |
| CSNK1G3   | 0.195887 | 3.60E-05 |
| LASP1     | -0.17447 | 3.61E-05 |
| ASH1L     | -0.18882 | 3.61E-05 |
| USP43     | 0.58293  | 3.63E-05 |
| RAD54L    | -0.22514 | 3.66E-05 |
| NCR3LG1   | 0.676707 | 3.67E-05 |
| KIF1A     | -0.17862 | 3.67E-05 |
| MAGI3     | 0.237298 | 3.68E-05 |

|          |          |          |
|----------|----------|----------|
| GPR19    | 1.130189 | 3.68E-05 |
| KLHL13   | 0.418768 | 3.70E-05 |
| METTL22  | -0.24987 | 3.70E-05 |
| UMPS     | -0.18814 | 3.70E-05 |
| C3orf52  | 0.502684 | 3.71E-05 |
| SALL3    | 0.287985 | 3.72E-05 |
| TRAF3IP1 | -0.27702 | 3.77E-05 |
| RARS2    | -0.19542 | 3.77E-05 |
| LSM14B   | -0.23781 | 3.83E-05 |
| USP3     | 0.192883 | 3.85E-05 |
| NUP43    | -0.20193 | 3.85E-05 |
| KDM4D    | 0.459265 | 3.88E-05 |
| EMC3     | -0.25293 | 3.88E-05 |
| TMEM86B  | -0.91807 | 3.88E-05 |
| CSNK1G2  | -0.16471 | 3.89E-05 |
| BUB1     | -0.15987 | 3.92E-05 |
| ZNF90    | 0.598429 | 3.92E-05 |
| CLASRP   | -0.23343 | 3.94E-05 |
| ZNF212   | -0.31142 | 3.94E-05 |
| SEC23B   | -0.21175 | 3.97E-05 |
| ATP6V1D  | -0.27368 | 3.98E-05 |
| PNMA1    | 0.250355 | 3.99E-05 |
| SPEN     | -0.19147 | 3.99E-05 |
| CLN5     | 0.396291 | 4.01E-05 |
| RBL1     | 0.193359 | 4.01E-05 |
| TRAK1    | 0.302439 | 4.02E-05 |
| THNSL1   | 0.436181 | 4.02E-05 |
| KIF22    | -0.17081 | 4.05E-05 |
| TRNP1    | 0.366448 | 4.06E-05 |
| CPSF3L   | -0.16765 | 4.10E-05 |
| PSMB6    | -0.18055 | 4.12E-05 |
| SMG7     | -0.16215 | 4.21E-05 |
| MRPS2    | -0.21805 | 4.21E-05 |
| TRIM37   | -0.21138 | 4.22E-05 |
| 7-Mar    | -0.15949 | 4.27E-05 |
| HMGB3    | -0.15549 | 4.29E-05 |
| XBP1     | -0.22897 | 4.30E-05 |
| PAK1     | 0.163985 | 4.31E-05 |
| PSMA5    | -0.17423 | 4.34E-05 |
| TET1     | 0.558495 | 4.38E-05 |
| HLA-A    | 0.170292 | 4.39E-05 |
| USP35    | 0.519753 | 4.40E-05 |
| SLC45A2  | 1.195434 | 4.41E-05 |
| PAQR7    | 0.76921  | 4.41E-05 |
| TAF4     | -0.32094 | 4.44E-05 |
| ZC3H12A  | -0.5749  | 4.53E-05 |
| DDX23    | -0.17659 | 4.59E-05 |

|           |          |          |
|-----------|----------|----------|
| UBP1      | -0.17663 | 4.61E-05 |
| NOC3L     | -0.21241 | 4.65E-05 |
| SEPHS2    | 0.189233 | 4.67E-05 |
| NOB1      | -0.16181 | 4.67E-05 |
| SNORD55   | -0.68378 | 4.67E-05 |
| SDPR      | 0.176363 | 4.68E-05 |
| VEPH1     | 0.263745 | 4.72E-05 |
| P4HA2     | 0.228443 | 4.75E-05 |
| PARG      | -0.2114  | 4.75E-05 |
| RANBP2    | -0.20894 | 4.76E-05 |
| DUSP10    | -0.1642  | 4.81E-05 |
| MCM3AP    | -0.18883 | 4.81E-05 |
| TMEM30A   | -0.15731 | 4.82E-05 |
| FSTL3     | 0.479553 | 4.83E-05 |
| MED6      | -0.23866 | 4.84E-05 |
| FUT11     | 0.418697 | 4.84E-05 |
| PTPRG-AS1 | 0.714186 | 4.84E-05 |
| KLF13     | 0.219537 | 4.85E-05 |
| TRIM56    | 0.494303 | 4.86E-05 |
| NCBP1     | -0.17148 | 4.88E-05 |
| LOC101929 | 0.491106 | 4.90E-05 |
| SNRNP27   | -0.20858 | 4.91E-05 |
| IRF7      | -0.42833 | 4.93E-05 |
| FERMT1    | 0.26351  | 4.95E-05 |
| KIAA1467  | 0.470893 | 4.96E-05 |
| AOC3      | -1.12324 | 4.97E-05 |
| TRPM4     | 0.807894 | 5.00E-05 |
| SLC39A7   | -0.15945 | 5.00E-05 |
| ARMC7     | 0.284034 | 5.00E-05 |
| SDC4      | 0.698669 | 5.04E-05 |
| SLAIN2    | -0.18894 | 5.06E-05 |
| LINC01249 | 1.129414 | 5.08E-05 |
| WWP2      | -0.18505 | 5.11E-05 |
| XRCC6     | -0.15109 | 5.15E-05 |
| KIAA0753  | -0.34971 | 5.17E-05 |
| SNAPC1    | 0.421539 | 5.17E-05 |
| EPM2AIP1  | 0.929046 | 5.20E-05 |
| PHLPP2    | -0.22114 | 5.22E-05 |
| FOXO1     | 0.485052 | 5.22E-05 |
| PVRL3     | 0.305082 | 5.22E-05 |
| KAT8      | -0.1879  | 5.25E-05 |
| MBOAT1    | 0.418099 | 5.25E-05 |
| EPG5      | -0.25998 | 5.29E-05 |
| B3GALNT1  | 0.962315 | 5.29E-05 |
| DERL2     | -0.24883 | 5.29E-05 |
| ZNF780A   | 0.475652 | 5.29E-05 |
| P4HB      | -0.14867 | 5.30E-05 |

|           |          |          |
|-----------|----------|----------|
| TNFRSF1A  | -0.31266 | 5.37E-05 |
| LOC646719 | 0.567885 | 5.38E-05 |
| UBR7      | -0.19219 | 5.47E-05 |
| ZSCAN25   | -0.22287 | 5.47E-05 |
| POP4      | -0.20692 | 5.47E-05 |
| SBK1      | 0.452193 | 5.48E-05 |
| TMEM56    | 0.556223 | 5.60E-05 |
| PARP8     | 0.401526 | 5.60E-05 |
| SMIM13    | 0.283861 | 5.63E-05 |
| IRGQ      | 0.245455 | 5.63E-05 |
| STYX      | -0.2455  | 5.68E-05 |
| TMEM17    | 0.752899 | 5.69E-05 |
| C9orf78   | -0.22299 | 5.71E-05 |
| SRC       | 0.195418 | 5.74E-05 |
| PEF1      | -0.20518 | 5.74E-05 |
| NR2C2     | -0.26322 | 5.75E-05 |
| FASLG     | 1.014723 | 5.78E-05 |
| CDK11A    | -0.4191  | 5.79E-05 |
| PGGT1B    | -0.203   | 5.80E-05 |
| TTC9      | -0.1875  | 5.83E-05 |
| RPS6KB2   | -0.20013 | 5.83E-05 |
| PPP1CC    | -0.15391 | 5.83E-05 |
| TM2D2     | -0.21768 | 5.87E-05 |
| HGS       | -0.20967 | 5.89E-05 |
| USP51     | 0.952588 | 6.06E-05 |
| TSPYL1    | -0.2122  | 6.08E-05 |
| ZNF658    | 0.774043 | 6.12E-05 |
| WIBG      | -0.25762 | 6.17E-05 |
| CHL1      | 0.148386 | 6.19E-05 |
| F8A1      | 0.973907 | 6.20E-05 |
| MLH3      | 0.385579 | 6.22E-05 |
| TMEM97    | 0.184942 | 6.23E-05 |
| KIAA1191  | -0.16717 | 6.26E-05 |
| GLCCI1    | 0.190344 | 6.31E-05 |
| VAPA      | -0.17269 | 6.32E-05 |
| CEP170    | 0.183087 | 6.33E-05 |
| TNFSF9    | 0.441932 | 6.35E-05 |
| VIL1      | 0.803539 | 6.37E-05 |
| MANBA     | 0.38941  | 6.38E-05 |
| C11orf95  | 0.410191 | 6.41E-05 |
| YAE1D1    | 0.329928 | 6.41E-05 |
| ZNF346    | 0.201429 | 6.42E-05 |
| CCNB2     | -0.15231 | 6.45E-05 |
| TFB2M     | -0.24429 | 6.45E-05 |
| LPL       | 0.263446 | 6.55E-05 |
| ZNF445    | 0.398609 | 6.63E-05 |
| GAS5      | -0.15995 | 6.64E-05 |

|           |          |          |
|-----------|----------|----------|
| HES4      | 0.730795 | 6.65E-05 |
| NACAD     | 0.626126 | 6.75E-05 |
| POMGNT2   | 0.364797 | 6.78E-05 |
| UBE3C     | -0.16976 | 6.80E-05 |
| CHN2      | 0.650772 | 6.81E-05 |
| CNOT6     | -0.17736 | 6.84E-05 |
| CTSC      | 0.182953 | 6.84E-05 |
| U2AF1     | -0.21714 | 6.85E-05 |
| PTGFRN    | 0.228015 | 6.87E-05 |
| GAB1      | 0.595072 | 6.87E-05 |
| ST3GAL4-A | 0.659599 | 6.89E-05 |
| RBAK      | -0.20267 | 6.89E-05 |
| NDOR1     | -0.26752 | 6.92E-05 |
| ZNF662    | 1.030351 | 6.95E-05 |
| PRELID2   | 0.482583 | 7.00E-05 |
| PTX3      | 0.202335 | 7.07E-05 |
| WASL      | -0.24654 | 7.09E-05 |
| C12orf60  | 0.731721 | 7.10E-05 |
| LSR       | -0.19633 | 7.20E-05 |
| ZFP1      | 0.266566 | 7.23E-05 |
| DPH2      | -0.14587 | 7.23E-05 |
| LARP4     | -0.17966 | 7.23E-05 |
| MESDC1    | 0.242866 | 7.23E-05 |
| POLR3GL   | 0.398716 | 7.24E-05 |
| ATAD2B    | -0.17485 | 7.25E-05 |
| ARFGAP2   | -0.17198 | 7.25E-05 |
| TMEM171   | 0.883152 | 7.29E-05 |
| KPNB1     | -0.14723 | 7.32E-05 |
| HR        | 0.260859 | 7.32E-05 |
| FBXO34    | 0.226557 | 7.42E-05 |
| ARHGEF3   | 0.248551 | 7.46E-05 |
| HERC2P7   | 0.505263 | 7.50E-05 |
| SLC22A17  | 0.476106 | 7.53E-05 |
| SLC45A1   | 0.946369 | 7.58E-05 |
| MAPRE2    | 0.178511 | 7.65E-05 |
| ZNF37A    | 0.24648  | 7.66E-05 |
| RP9P      | 0.306178 | 7.73E-05 |
| WASF1     | 0.246799 | 7.77E-05 |
| PCDHGC3   | 0.45863  | 7.82E-05 |
| PSMD6     | -0.16464 | 7.82E-05 |
| MRPS23    | -0.20869 | 7.90E-05 |
| NSD1      | 0.155887 | 7.94E-05 |
| PNPLA3    | 0.556648 | 8.04E-05 |
| ETV6      | 0.549582 | 8.10E-05 |
| MDN1      | -0.21127 | 8.14E-05 |
| SUGP1     | -0.24493 | 8.23E-05 |
| LRRFIP2   | -0.22932 | 8.32E-05 |

|           |          |          |
|-----------|----------|----------|
| DCP1B     | 0.473024 | 8.35E-05 |
| TAX1BP1   | -0.20723 | 8.36E-05 |
| SLC9A3R1  | -0.28194 | 8.37E-05 |
| HSPH1     | -0.15209 | 8.41E-05 |
| STX7      | 0.34697  | 8.41E-05 |
| YPEL5     | -0.33778 | 8.45E-05 |
| TRIM44    | 0.205716 | 8.46E-05 |
| AGPAT4    | 0.279909 | 8.47E-05 |
| CKAP5     | -0.15305 | 8.50E-05 |
| ZC3H4     | -0.19989 | 8.53E-05 |
| LINC01184 | 0.479574 | 8.57E-05 |
| CAPRIN1   | -0.13612 | 8.58E-05 |
| MANEA     | 0.203755 | 8.60E-05 |
| FSCN1     | -0.18402 | 8.62E-05 |
| TMSB15A   | 1.110772 | 8.63E-05 |
| ZNF641    | 0.437174 | 8.66E-05 |
| WDR3      | -0.14199 | 8.72E-05 |
| PLSCR1    | 0.452275 | 8.76E-05 |
| BCL9L     | 0.651911 | 8.81E-05 |
| 2-Sep     | -0.15416 | 8.86E-05 |
| A4GALT    | 0.448545 | 8.87E-05 |
| SMARCC1   | -0.16621 | 8.90E-05 |
| PSMB5     | -0.15695 | 9.09E-05 |
| NCAPH2    | -0.2081  | 9.11E-05 |
| ZMAT1     | 0.922998 | 9.12E-05 |
| FABP5     | 0.177209 | 9.13E-05 |
| WDR36     | -0.17355 | 9.19E-05 |
| TSC2      | -0.22558 | 9.19E-05 |
| EIF4B     | -0.16308 | 9.25E-05 |
| LAMP3     | 0.556614 | 9.33E-05 |
| MPP5      | 0.187474 | 9.34E-05 |
| ASPH      | 0.158681 | 9.35E-05 |
| SLC25A4   | 0.166666 | 9.39E-05 |
| NUPL2     | -0.2289  | 9.40E-05 |
| TRAPPC12  | -0.18913 | 9.42E-05 |
| LIX1L     | 0.297186 | 9.42E-05 |
| PKD2      | 0.284381 | 9.48E-05 |
| PRKAR1A   | -0.16448 | 9.49E-05 |
| C22orf29  | 0.326073 | 9.50E-05 |
| LMBRD1    | 0.262804 | 9.51E-05 |
| EXOSC6    | -0.19954 | 9.55E-05 |
| ZBED6     | -0.64901 | 9.56E-05 |
| LPIN2     | 0.316775 | 9.61E-05 |
| NUP62     | -0.17449 | 9.67E-05 |
| VPS37A    | -0.19079 | 9.71E-05 |
| PTCD3     | -0.16289 | 9.80E-05 |
| GTPBP1    | -0.18214 | 9.85E-05 |

|        |          |          |
|--------|----------|----------|
| RBM33  | -0.21229 | 9.92E-05 |
| SAR1B  | -0.17887 | 9.94E-05 |
| MRPS30 | -0.1933  | 9.98E-05 |
